# Supplementary material for: Relay Zn(ii)- and Au(i)-catalyzed aziridination/cyclization/ring expansion sequence to form 3-benzazepine derivatives
Source: Royal Society of Chemistry journal article supplement (doi:10.1039/d3qo00134b), 2023-01-01

**Relay Zn(II)- and Au(I)-Catalyzed Aziridination/Cyclization/Ring Expansion Sequence to form 3-Benzazepine Derivatives**

**Sudhakar Dattatray Tanpure,<sup>a</sup> Rahul Dadabhau Kardile,<sup>a</sup> and Rai-Shung Liu<sup>a\*</sup>**

<sup>a</sup>Department of Chemistry, National Tsing Hua University, Hsinchu, Taiwan, ROC  
-----e-mail: rslu@mx.nthu.edu.tw

**Content:**

|                                                                        |            |
|------------------------------------------------------------------------|------------|
| <b>(1) Representative synthetic procedures-----</b>                    | <b>S2</b>  |
| <b>(2) Standard procedures for catalytic operation-----</b>            | <b>S4</b>  |
| <b>(3) Optimization of Gold Catalysts-----</b>                         | <b>S7</b>  |
| <b>(4) Synthetic procedures for chemical functionalizations-----</b>   | <b>S8</b>  |
| <b>(5) References-----</b>                                             | <b>S10</b> |
| <b>(6) Spectral data for key compounds-----</b>                        | <b>S11</b> |
| <b>(7) X-ray crystallographic data of 3a, 4a, 4q-----</b>              | <b>S34</b> |
| <b>(8) <sup>1</sup>H and <sup>13</sup>C spectra key compounds-----</b> | <b>S54</b> |

## (1) Representative Synthetic Procedures:

### (a) General procedure.

Unless otherwise noted, the preparations of substrates were performed in oven-dried glassware under nitrogen atmosphere with freshly distilled solvents. The catalytic reactions were performed under nitrogen atmosphere. DCM, DCE, and toluene were distilled from CaH<sub>2</sub> under nitrogen. THF was distilled from Na metal under nitrogen. All other commercial reagents were used without further purification, unless otherwise indicated. <sup>1</sup>H NMR and <sup>13</sup>C NMR spectra were recorded on a Varian 500, Varian 700 MHz, Bruker 400 MHz spectrometers using chloroform-*d* (CDCl<sub>3</sub>) as the internal standard. High-resolution mass spectral analysis (HRMS) data were measured on JMST100LP4G (JEOL) mass spectrometer or a TOF mass analyzer equipped with the ESI source, JEOL Model: JMS-T200GC AccuTOF GCx equipped with FD (field desorption) source and Magnetic Sector Mass Analyzer (MStation) equipped with the EI source. Single-crystal X-ray diffraction intensity data were collected on a Bruker X8 APEX diffractometer equipped with a CCD area detector and Mo K $\alpha$  radiation ( $\lambda = 0.71073 \text{ \AA}$ ) at 100 K; all data calculations were performed by using the PC version of the APEX2 program package.

### (b) Synthesis of (*E*)-*N*-(2-(phenylethynyl)benzylidene)aniline (**1a**).<sup>s1</sup>

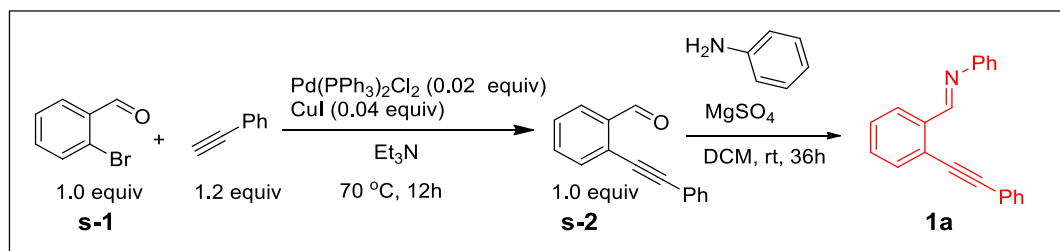

#### Synthesis of 2-(phenylethynyl)benzaldehyde (**s-2**).

A round bottom flask was charged with Pd(PPh<sub>3</sub>)<sub>2</sub>Cl<sub>2</sub> (76.6 mg, 0.010 mmol, 0.02 equiv) and CuI (41.5 mg, 0.020 mmol, 1.25 mol%, 0.04 equiv). To this mixture was added Et<sub>3</sub>N (10 mL). The solution was kept stirring and 2-bromobenzaldehyde **s-1** (1.0 g, 5.46 mmol, 1.0 equiv) was added. Finally, phenylacetylene (0.66 g, 6.55 mmol, 1.2 equiv.) was added using a syringe over 10 min at 25<sup>o</sup>C. Then the mixture was stirred at room temperature for 12 h. After completion of the reaction, the reaction mixture was filtered through celite and concentrated under reduced pressure to afford crude. The residue was purified on a silica gel column to give 2-(phenylethynyl)benzaldehyde **s-2** (1.02 g, 4.97 mmol, 91%) as a brown oil.

### Synthesis (*E*)-*N*-(2-(phenylethynyl)benzylidene)aniline (**1a**).

To a stirred solution of 2-(phenylethynyl)benzaldehyde (**s-2**) (0.5 g 2.4 mmol, 1.0 equiv) in DCM (4.0 mL) were added MgSO<sub>4</sub> (1.0 g) and aniline (0.22 g, 2.4 mmol, 1.0 equiv) at room temperature. The resulting mixture was stirred at rt for 36 h, then this reaction mixture was filtered through a short celite bed and the filtrate was concentrated under reduced pressure to afford ((*E*)-*N*-(2-(phenylethynyl)benzylidene)aniline (**1a**) (0.491 g, 1.74 mmol, 72%). Crude product of **1a** was used directly for further catalytic reaction.

Other Substrates **1b-1t** were synthesized according to the same procedure of **b**.

All Imine (**1a-1n**) were prepared from procedure reported in the literatures.<sup>s1</sup>

Substrates **1u** was synthesized according to the literature procedure.<sup>s2</sup>

### (c) Synthesis of $\alpha$ -diazo esters (**2d**).<sup>s3</sup>

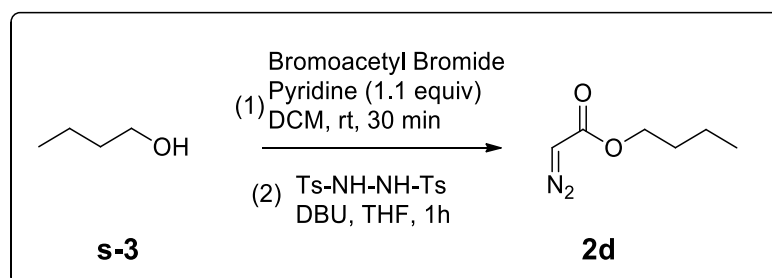

To a solution of n-butyl alcohol **s-3** (0.50 g, 6.75 mmol, 1.0 equiv) and pyridine (0.58 g, 7.43 mmol, 1.1 equiv) in DCM (20 mL) was added bromoacetyl bromide (1.61 g, 8.1 mmol, 1.2 equiv) dropwise at 0 °C; the resulting mixture was stirred for 15 min at room temperature, quenched with water, and extracted with DCM. The organic layer was washed with brine, dried with MgSO<sub>4</sub>, and concentrated in vacuo to give a bromoacetate product, which was used in the next step without purification. The bromoacetate product (0.90 g, 4.6 mmol, 1.0 equiv) and *N,N'*-ditosylhydrazine (3.1 g, 9.2 mmol, 2.0 equiv) were dissolved in THF (20 mL), and cooled to 0 °C, and to this mixture was added DBU (1.05 g, 6.9 mmol, 1.5 equiv) was added slowly over 5 min. After stirring for 1h at the same temperature, the reaction solution was quenched with saturated NaHCO<sub>3</sub> and extracted with Et<sub>2</sub>O three times. Organic phase was washed with brine, dried with MgSO<sub>4</sub> and evaporate to dryness, affording diazo crude product which was purified on a silica column using ethyl acetate/hexane (20/80) as the eluent to give desired butyl 2-diazoacetate **2d** (0.579 g, 4.08 mmol, 88%) as a pale-yellow oil.

**2a** is commercially available from Sigma-Aldrich and other diazo esters (**2b-2i**) were prepared with the above procedure.

**(d) Synthesis of 2-diazo-1-phenylethanone (2k).**

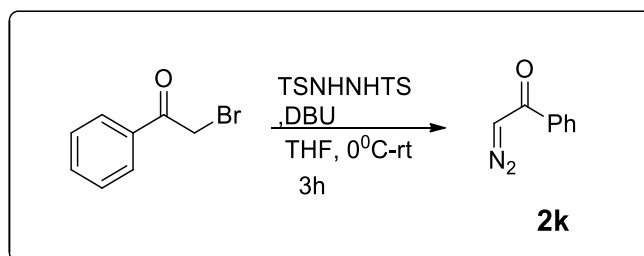

In a well-dried 200-mL flask, 2-bromo-1-phenylethanone (1.0 g, 5.0 mmol) and *N,N'*-ditosylhydrazine (3.4, 10 mmol) was dissolved in 30 mL THF, and a DBU (3.7 mL, 25.0 mmol) was added dropwise with stirring. The reaction mixture was stirred at room temperature for 3h. the reaction solution was quenched with saturated H<sub>2</sub>O and extracted with Et<sub>2</sub>O three times. Organic phase was washed with brine, dried with MgSO<sub>4</sub> and evaporate to dryness, affording diazo crude product which was purified on a silica column using ethyl acetate/hexane (8/92) as the eluent to give desired 2-diazo-1-phenylethanone **2k** (0.554 g, 3.8 mmol, 76%) as a yellow solid.

(diazomethyl)trimethylsilane **2l** is commercially available from thermo scientific.

**2. Standard procedures for catalytic operations:**

**(a) Typical procedure for (2*S*,3*R*)-ethyl 1-phenyl-3-(2-(phenylethynyl)phenyl)aziridine-2-carboxylate (3a):**

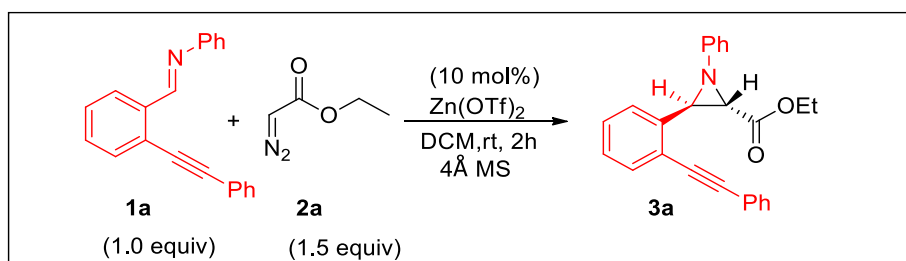

A suspension of Zn(OTf)<sub>2</sub> (7.7 mg, 0.021 mmol) and 4 Å MS (30-40 mg) in dry DCM (1.0 mL) was fitted with N<sub>2</sub> balloon and the mixture was stirred at 25°C for 2 min at 25 °C. To this solution was added a DCM (3 mL) solution of (*E*)-*N*-(2-(phenylethynyl)benzylidene)aniline **1a** (60 mg, 0.21 mmol) and ethyl 2-diazoacetate **2a** (36.5 mg, 0.32 mmol) and the reaction was further stirred at 25°C for 2h. After completion of the reaction, the solution was filtered over a short celite bed. The solvent was evaporated to dryness under reduced pressure, and the residue was purified on a neutral alumina column using ethyl acetate/hexane (2:98) as the eluent to give compound (2*S*,3*R*)-ethyl 1-phenyl-3-(2-(phenylethynyl)phenyl)aziridine-2-carboxylate **3a** (56 mg, 0.15 mmol, 71%) as off-white solid.

**(b) Typical procedure for ethyl 3,4-diphenyl-3H-benzo[d]azepine-2-carboxylate (4a):**

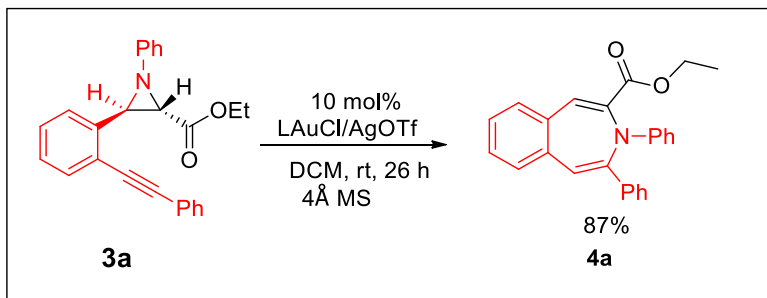

A suspension of LAuCl (L= P(*t*-Bu)<sub>2</sub>(*o*-biphenyl)) (7.2 mg, 0.013 mmol) and AgOTf (3.5 mg, 0.013 mmol) in dry DCM (1.0 mL) was fitted with a N<sub>2</sub> balloon, and the mixture was stirred at 25 °C for 5 min. To this mixture was added a dry DCM (3.0 mL) solution of ethyl 1-phenyl-3-(2-phenylethynyl)phenylaziridine-2-carboxylate **3a** (50 mg, 0.13 mmol) at 25 °C. The resulting mixture was stirred at 25 °C for 26 h. The solution was filtered over a short celite bed and evaporated under reduced pressure. The residue was purified on a silica gel column using ethyl acetate/hexane (03:97) as the eluent to give ethyl 3,4-diphenyl-3H-benzo[d]azepine-2-carboxylate **4a** as yellow solid (43.5 mg, 0.11 mmol, 87%).

**(c) Typical procedure for synthesis of (ethyl 3,4-diphenyl-3H-benzo[d]azepine-2-carboxylate (4a):**

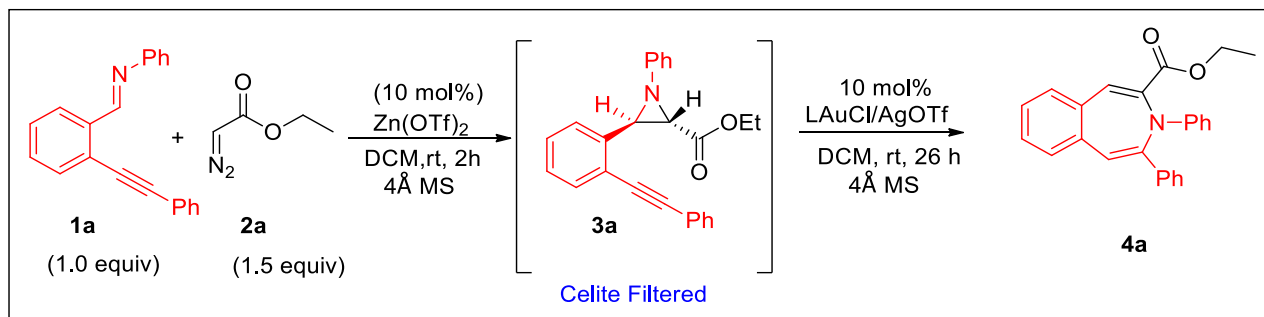

A suspension of Zn(OTf)<sub>2</sub> (7.7 mg, 0.021 mmol) and 4 Å MS (30-40 mg) in dry DCM (1.0 mL) was fitted with N<sub>2</sub> balloon and the mixture was stirred at 25°C for 2 min at 25 °C. To this solution was added a DCM (3 mL) solution of (*E*)-N-(2-(phenylethynyl)benzylidene)aniline **1a** (60 mg, 0.21 mmol) and ethyl 2-diazoacetate **2a** (36.5 mg, 0.32 mmol) and the reaction was further stirred at 25°C for 2h. After completion of the reaction, the solution was filtered over a short celite bed; to the filtrate was added LAuCl (L= P(*t*-Bu)<sub>2</sub>(*o*-biphenyl)) (11.3 mg, 0.021 mmol), AgOTf (5.4 mg, 0.021 mmol) and 4 Å MS in dry DCM (1.0 mL) under the N<sub>2</sub> atmosphere. The resulting mixture was stirred at 25 °C for 26 h. The solution was filtered over a short celite bed and evaporated under reduced pressure. The residue was purified on a silica gel column using ethyl acetate/hexane (03:97) as the eluent to give ethyl 3,4-diphenyl-3H-benzo[d]azepine-2-carboxylate **4a** as yellow solid (59.5 mg, 0.16 mmol, 76%).

**(d) Typical procedure for (2R,3R)-ethyl 1,3-diphenylaziridine-2-carboxylate (7a):**

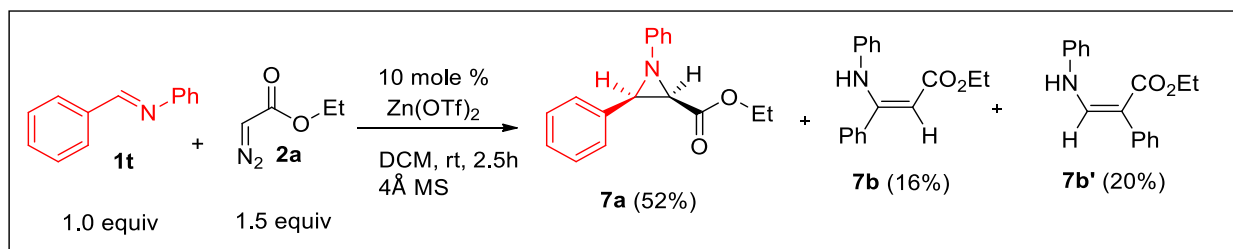

A suspension of Zn(OTf)<sub>2</sub> (16.0 mg, 0.044 mmol) and 4 Å MS (20-30 mg) in dry DCM (1.0 mL) was fitted with N<sub>2</sub> balloon and the mixture was stirred at 25°C for 2 min at 25 °C. To this solution was added a DCM (3 mL) solution of (*E*)-*N*-benzylideneaniline **1t** (80 mg, 0.44 mmol) and ethyl 2-diazoacetate **2a** (75.5 mg, 0.66 mmol) and the reaction was further stirred at 25°C for 2.5h. After completion of the reaction, the solution was filtered over a short celite bed. The solvent was evaporated to dryness under reduced pressure to afford the crude product which was analyzed by <sup>1</sup>H NMR. Crude <sup>1</sup>H NMR showed only *cis*-aziridine product peaks and *trans*-aziridine product peaks not observed in crude data. The residue was purified on a silica column using ethyl acetate/hexane (3:97) as the eluent to give (2*R*,3*R*)-ethyl 1,3-diphenylaziridine-2-carboxylate **7a** (61.3 mg, 0.22 mmol, 52%) as white solid.

**(e) Typical procedure for ethyl 1,3-diphenylaziridine-2-carboxylate (7a): (Jørgensen Procedure)<sup>s4</sup>**

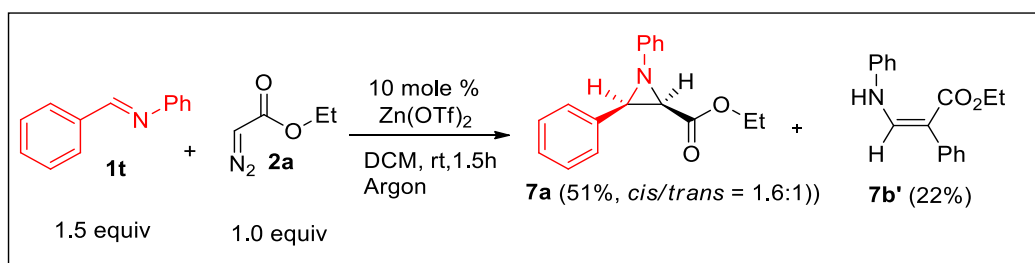

The Zn(OTf)<sub>2</sub> (25.5 mg, 0.070 mmol) was added to a 10-ml Schlenk flask which was evacuated and filled twice with Ar. The DCM (4 ml) was added followed by the (*E*)-*N*-benzylideneaniline **1t** (190 mg, 1.05 mmol) and ethyl 2-diazoacetate **2a** (80 mg, 0.70 mmol). When the evolution of N<sub>2</sub> ceased the reaction mixture was filtered through a plug of silica gel, which was washed with additional CH<sub>2</sub>Cl<sub>2</sub> (5 ml) and evaporated *in vacuo* to give the crude product which was analyzed by <sup>1</sup>H NMR. Crude <sup>1</sup>H NMR showed a mixture of *cis/trans* aziridine = 1.6:1. The crude product was purified by short flash column chromatography to give ethyl 1,3-diphenylaziridine-2-carboxylate (**7a**) (95.5 mg, 0.35 mmol, 51%).

### 3. Table S1: Optimization of Gold Catalysts:

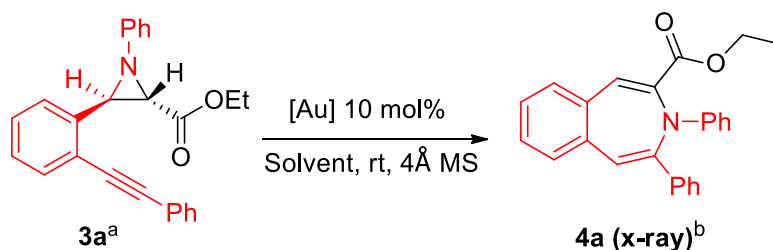

| Entry    | [Catalyst]<br>(10 mol%)                         | Time<br>(h) | Solvent    | Yield (%) <sup>b</sup> |
|----------|-------------------------------------------------|-------------|------------|------------------------|
|          |                                                 |             |            | <b>4a</b>              |
| 1        | PPh <sub>3</sub> AuCl/AgOTf                     | 30          | DCM        | 71%                    |
| 2        | (PhO) <sub>3</sub> PAuCl/AgOTf                  | 34          | DCM        | 63%                    |
| 3        | (2,4- <i>t</i> -BuPhO) <sub>3</sub> PAuCl/AgOTf | 27          | DCM        | 68%                    |
| 4        | IPrAuCl/AgOTf                                   | 28          | DCM        | 78%                    |
| <b>5</b> | <b>LAuCl/AgOTf</b>                              | <b>26</b>   | <b>DCM</b> | <b>87%</b>             |
| 6        | LAuCl/AgNTf <sub>2</sub>                        | 30          | DCM        | 80%                    |
| 7        | LAuCl/AgSbF <sub>6</sub>                        | 28          | DCM        | 75%                    |
| 8        | LAuCl/ANaBARF                                   | 23          | DCM        | 54%                    |
| 9        | AgOTf                                           | 31          | DCM        | 69%                    |
| 10       | LAuCl/AgOTf                                     | 25          | DCE        | 79%                    |
| 11       | LAuCl/AgOTf                                     | 32          | Toluene    | 73%                    |

<sup>a</sup>**1a** = 0.03M. <sup>b</sup>Product yields are obtained after purification from a silica column. L = P(*t*-Bu)<sub>2</sub>(*o*-biphenyl). IPr = 1,3-bis(diisopropylphenyl) imidazol-2-ylidene.

We optimized reaction condition for formation **4a**. Table **S1** shows the optimizations of reaction conditions of ethyl 3,4-diphenyl-3*H*-benzo[d]azepine-2-carboxylate **4a** using various catalysts; the results are summarized in Table **S1**. Our initial test of PPh<sub>3</sub>AuCl/AgOTf and P(PhO)<sub>3</sub>AuCl/AgOTf in dry DCM near 25 °C delivered **4a** in 63–71% yield, (entries 1-2). For (2,4-*t*-BuPhO)<sub>3</sub>PAuCl/AgOTf in DCM, compound **4a** was obtained in 68% yield (entry 3). Next we tested, IPrAuCl/AgOTf in DCM, yielding compound **4a** in 78% yield (entry 4). With LAuCl/AgOTf, (L = P(*t*-Bu)<sub>2</sub>(*o*-biphenyl)) we observed an enhanced efficiency, giving compound **4a** in 87% yield (entry 5). Variations of silver salts as in LAuCl/AgX, (X = NTf<sub>2</sub>, SbF<sub>6</sub>) in DCM afforded compound **4a** in 75-80% yields (entries 6-7). For LAuCl/NaBARF (L = P(*t*-Bu)<sub>2</sub>(*o*-biphenyl)) in DCM, compound **4a** was obtained in 54% yield (entry 8). With AgOTf (10 mol %), the yield of compound **4a** in 69% yield (entry 9). For LAuCl/AgOTf, (L = P(*t*-Bu)<sub>2</sub>(*o*-biphenyl)) in other solvents, the yields of compound **4a** were as follows: DCE (79%), toluene (73%) (entries 10–11).

#### 4. Synthetic procedures for chemical functionalizations:

##### (a) Synthesis of (3,4-diphenyl-3H-benzo[d]azepin-2-yl)methanol (**6a**):

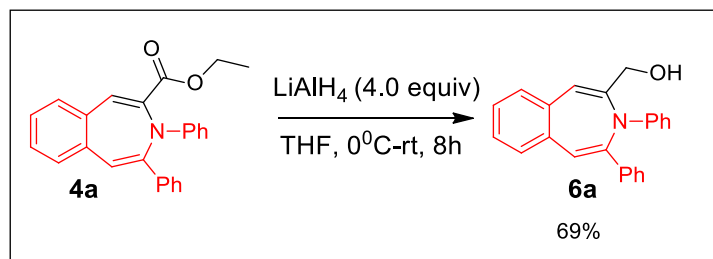

To a stirred solution of ethyl 3,4-diphenyl-3H-benzo[d]azepine-2-carboxylate **4a** (80 mg, 0.217 mmol) in dry THF (3.0 mL) at 0 °C was added LiAlH<sub>4</sub> (21.6 mg, 0.58 mmol). The resulting mixture was stirred for 6h at 25<sup>0</sup>C, confirmed the completion of reaction using TLC. Reaction mixture was quenched with saturated solution of NH<sub>4</sub>Cl, followed by separation of organic and aqueous layer. The solvent was evaporated under reduced pressure, and eluted through a silica column with ethyl acetate/hexane (20:80) to yield compound ((3,4-diphenyl-3H-benzo[d]azepin-2-yl)methanol **6a** (49 mg, 0.15 mmol, 69 %) as light-yellow oil.

##### (b) Synthesis of 3,4-diphenyl-3H-benzo[d]azepine-2-carbaldehyde (**6b**):

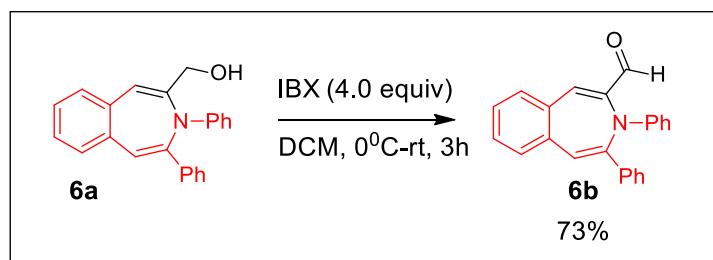

To a stirred solution of ((3,4-diphenyl-3H-benzo[d]azepin-2-yl)methanol **6a** (45 mg, 0.13 mmol) in dry DCM (4.0 mL) at 0 °C was added IBX (155.0 mg, 0.55 mmol). The resulting mixture was stirred for 3h at 0-25<sup>0</sup>C, confirmed the completion of reaction using TLC. Reaction mixture was filtered through celite and concentrated under reduced pressure, and eluted through a silica column with ethyl acetate/hexane (13:87) to afford compound 3,4-diphenyl-3H-benzo[d]azepine-2-carbaldehyde **6b** (32.6 mg, 0.10 mmol, 73 %) as light-yellow oil.



**(c) Synthesis of 2-(3,4-diphenyl-3H-benzo[d]azepin-2-yl)propan-2-ol (6c) :**

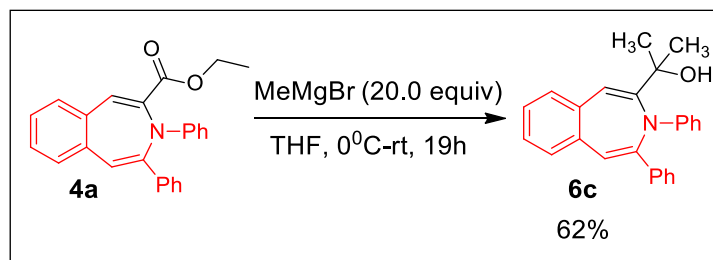

To a stirred solution of ethyl 3,4-diphenyl-3H-benzo[d]azepine-2-carboxylate **4a** (60 mg, 0.16 mmol) in dry THF (4.0 mL) at 0 °C was added MeMgBr (1.0 mL, 3.0 M in Et<sub>2</sub>O, 3.26 mmol). The resulting mixture was stirred for 19h at 0-25<sup>0</sup>C, confirmed the completion of reaction using TLC. Reaction mixture was quenched with saturated solution of NH<sub>4</sub>Cl, followed by the separation of organic and aqueous layer. The solvent was evaporated under reduced pressure, and eluted through a silica column with ethyl acetate/hexane (18:82) to yield compound 2-(3,4-diphenyl-3H-benzo[d]azepin-2-yl)propan-2-ol **6c** (36 mg, 0.10 mmol, 62 %) as yellow oil.

**(d) Synthesis of 1-(3,4-diphenyl-3H-benzo[d]azepin-2-yl)ethanone (6d) :**

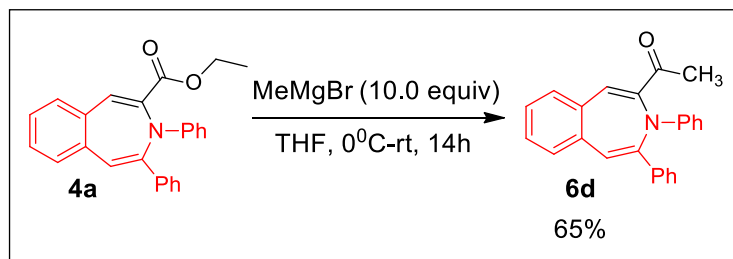

To a stirred solution of ethyl 3,4-diphenyl-3H-benzo[d]azepine-2-carboxylate **4a** (60 mg, 0.16 mmol) in dry THF (4.0 mL) at 0 °C was added MeMgBr (0.5 mL, 3.0 M in Et<sub>2</sub>O, 1.6 mmol). The resulting mixture was stirred for 14h at 0-25<sup>0</sup>C, confirmed the completion of reaction using TLC. Reaction mixture was quenched with saturated solution of NH<sub>4</sub>Cl, followed by the separation of organic and aqueous layer. The solvent was evaporated under reduced pressure, and eluted through a silica column with ethyl acetate/hexane (10:90) to afford compound 1-(3,4-diphenyl-3H-benzo[d]azepin-2-yl)ethanone **6d** (35.8 mg, 0.10 mmol, 65 %) as yellow oil.

## 5. References:

- [s1] (a) H. Luo, R. Liang, L. Chen, H. Jiang and S. Zhu, A silver-catalyzed three-component reaction via stabilized cation: synthesis of polysubstituted tetrahydronaphthols and tetrahydronaphthylamines. *Org. Chem. Front.*, 2018, **5**, 1160–1164; (b) T. Xiao, P. Peng, Y. Xie, Z.-Y. Wang and L. Zhou, Ag(I)-Catalyzed Three-Component Reaction of 2-Alkynylbenzaldehydes, Amines, and Diazo Compounds, *Org. Lett.*, 2015, **17**, 4332–4335; (c) T. Y. Chaudhari, Urvashi, S. K. Ginotra, P. Yadav, G. Kumar and V. Tandon, Regioselective synthesis of functionalized dihydroisoquinolines from *o*-alkynylarylaldimines via the Reformatsky reaction, *Org. Biomol. Chem.*, 2016, **14**, 9896–9906; (d) N. Asao, Yudha S. S, T. Nogami and Y. Yamamoto, Direct Mannich and Nitro-Mannich Reactions with Non-Activated Imines: AgOTf-Catalyzed Addition of Pronucleophiles to ortho-Alkynylaryl Aldimines Leading to 1,2-Dihydroisoquinolines, *Angew. Chem.*, 2005, **117**, 5662–5664.
- [s2] A. S. Narode and R-S. Liu, Gold-Catalyzed Bicyclic Annulations of *N*-(*o*-Alkynylphenyl)imines with  $\alpha$ -Diazo Esters to Form 5,6-Dihydroindolo[2,1-*a*]isoquinolines; *Org. Lett.*, 2022, **24**, 2165–2169.
- [s3] (a) R. D. Kardile and R.-S. Liu, Two Distinct Ag(I)- and Au(I)-Catalyzed Olefinations between  $\alpha$ -Diazo Esters and *N*-Boc-Derived Imines, *Org. Lett.*, 2019, **21**, 6452–6456; (b) A. S. Narode and R-S. Liu, Gold-Catalyzed Bicyclic Annulations of *N*-(*o*-Alkynylphenyl)imines with  $\alpha$ -Diazo Esters to Form 5,6-Dihydroindolo[2,1-*a*]isoquinolines, *Org. Lett.*, 2022, **24**, 2165–2169; (c) T. Toma, J. Shimokawa and T. Fukuyama, *N,N'*-Ditosylhydrazine: A Convenient Reagent for Facile Synthesis of Diazoacetates, *Org. Lett.*, 2007, **9**, 3195–3197; (d) H. Mao, A. Lin, Y. Shi, Z. Mao, X. Zhu, W. Li, H. Hu, Y. Cheng and C. Zhu, Construction of Enantiomerically Enriched Diazo Compounds Using Diazo Esters as Nucleophiles: Chiral Lewis Base Catalysis, *Angew. Chem. Int., Ed.*, 2013, **52**, 6288–6292; (e) D. M. Hodgson and D. Angrish, Highly Chemo- and Stereoselective Intermolecular Coupling of Diazoacetates To Give *cis*-Olefins by Using Grubbs Second-Generation Catalyst, *Chem. Eur. J.*, 2007, **13**, 3470 – 3479; (f) D. M. Carminati, D. Intrieri, A. Caselli, S. Le Gac, B. Boitrel, L. Toma, L. Legnani, E. Gallo, Designing ‘Totem’ C<sub>2</sub>-Symmetrical Iron Porphyrin Catalysts for Stereoselective Cyclopropanations, *Chem. Eur. J.*, 2016, **22**, 13599-13612; (g) H. S. A. Mandour, Y. Nakagawa, M. Tone, H. Inoue, N. Otago, I. Fujisawa, S. Chanthamath and S. Iwasa, Reusable and highly enantioselective water-soluble Ru(II)-Amm-Pheox catalyst for intramolecular cyclopropanation of diazo compounds, *Beilstein, J. Org. Chem.*, 2019, **15**, 357–363.
- [s4] K. G. Rasmussen and K. A. Jørgensen, Metal-catalysed reactions of imines with ethyl diazoacetate leading to aziridines, *J. Chem. Soc., Perkin Trans.1.*, 1997, 1287-1291.

## (6) Spectral data for key compounds:

### Spectral data of (E)-3-chloro-N-(2-(phenylethynyl)benzylidene)aniline (**1f**):

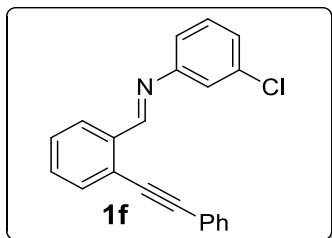

The compound **1f** was purified HPLC column using ethyl acetate/hexane:1/99 as the eluent; Brown oil (0.52 g, 1.65 mmol, 68%);  $^1\text{H}$  NMR (500 MHz,  $\text{CDCl}_3$ ):  $\delta$  9.05 (s, 1H), 8.23 (d,  $J = 7.5$  Hz, 1H), 7.60 (d,  $J = 7.0$  Hz, 1H), 7.54 ~ 7.52 (m, 2H), 7.47 ~ 7.41 (m, 2H), 7.31 ~ 7.30 (m, 4H), 7.25 ~ 7.20 (m, 2H), 7.12 (d,  $J = 7.0$  Hz, 1H);  $^{13}\text{C}$  NMR (125 MHz,  $\text{CDCl}_3$ ):  $\delta$  159.9, 153.4, 136.2, 134.7, 132.7, 131.5, 131.2, 130.2, 128.8, 128.7, 128.5, 126.7, 126.0, 125.3, 122.6, 121.2, 119.3, 95.7, 86.1; HRMS (ESI-TOF)  $m/z$ :  $[\text{M}+\text{H}]^+$  calcd. for  $\text{C}_{21}\text{H}_{15}\text{ClN}$ : 316.0893; found: 316.0894.

### Spectral data of (E)-2-chloro-N-(2-(phenylethynyl)benzylidene)aniline (**1h**):

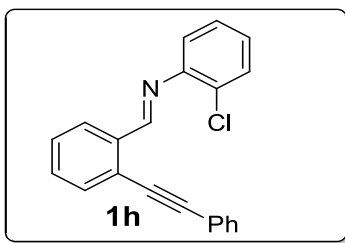

The compound **1h** was purified HPLC column using ethyl acetate/hexane:1/99 as the eluent; Brown oil (0.474 g, 1.50 mmol, 62%);  $^1\text{H}$  NMR (500 MHz,  $\text{CDCl}_3$ ):  $\delta$  9.02 (s, 1H), 8.34 (d,  $J = 7.0$  Hz, 1H), 7.62 ~ 7.60 (m, 1H), 7.53 ~ 7.51 (m, 2H), 7.48 ~ 7.43 (m, 3H), 7.36 ~ 7.34 (m, 3H), 7.28 (t,  $J = 7.5$  Hz, 1H), 7.15 (t,  $J = 7.5$  Hz, 1H), 7.08 (d,  $J = 8.0$  Hz, 1H);  $^{13}\text{C}$  NMR (125 MHz,  $\text{CDCl}_3$ ):  $\delta$  160.4, 149.5, 136.2, 132.6, 131.5, 131.2, 129.9, 128.7, 128.46, 128.45, 128.0, 127.6, 126.9, 126.5, 125.2, 122.6, 120.0, 95.4, 86.0; HRMS (ESI-TOF)  $m/z$ :  $[\text{M}+\text{H}]^+$  calcd. for  $\text{C}_{21}\text{H}_{15}\text{ClN}$ : 316.0893; found: 316.0888.

**Spectral data of (E)-N-(2-(naphthalen-2-ylethynyl)benzylidene)aniline (**1l**):**

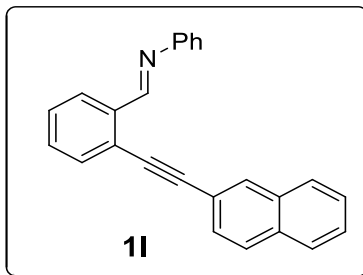

The compound **1l** was purified HPLC column using ethyl acetate/hexane: 2/98 as the eluent; Brown oil (0.465 g, 1.40 mmol, 72%);  $^1\text{H}$  NMR (400 MHz,  $\text{CDCl}_3$ ):  $\delta$  9.16 (s, 1H), 8.29 (d,  $J = 6.8$  Hz, 1H), 8.05 (s, 1H), 7.81 (d,  $J = 8.0$  Hz, 3H), 7.66 ~ 7.63 (m, 1H), 8.55 (d,  $J = 7.2$  Hz, 1H), 7.50 ~ 7.40 (m, 6H), 7.30 ~ 7.25 (m, 3H);  $^{13}\text{C}$  NMR (100 MHz,  $\text{CDCl}_3$ ):  $\delta$  158.9, 152.2, 136.8, 133.04, 133.01, 132.8, 131.6, 130.9, 129.3, 128.7, 128.2, 127.8, 126.9, 126.7, 126.2, 125.1, 121.1, 120.1, 95.9, 86.7; HRMS (ESI-TOF)  $m/z$ :  $[\text{M}+\text{H}]^+$  calcd. for  $\text{C}_{25}\text{H}_{18}\text{N}$ : 332.1439; found: 332.1442.

**Spectral data of (E)-N-(5-chloro-2-(phenylethynyl)benzylidene)aniline (**1n**):**

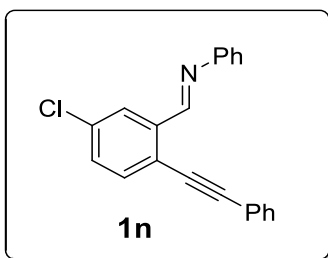

The compound **1n** was purified HPLC column using ethyl acetate/hexane: 2/98 as the eluent; Brown oil (0.452 g, 1.43 mmol, 69%);  $^1\text{H}$  NMR (400 MHz,  $\text{CDCl}_3$ ):  $\delta$  9.01 (s, 1H), 8.26 (s, 1H), 7.53 ~ 7.50 (m, 3H), 7.43 ~ 7.34 (m, 6H), 7.27 ~ 7.24 (m, 3H);  $^{13}\text{C}$  NMR (100 MHz,  $\text{CDCl}_3$ ):  $\delta$  157.2, 151.4, 138.0, 134.9, 133.7, 131.5, 130.8, 129.2, 128.8, 128.4, 126.55, 126.51, 123.2, 122.3, 121.0, 96.1, 85.2; HRMS (ESI-TOF)  $m/z$ :  $[\text{M}+\text{H}]^+$  calcd. for  $\text{C}_{21}\text{H}_{15}\text{N}$ : 316.0893; found: 316.0891.

**Spectral data of (E)-N-(5-methyl-2-(phenylethynyl)benzylidene)aniline (1p):**

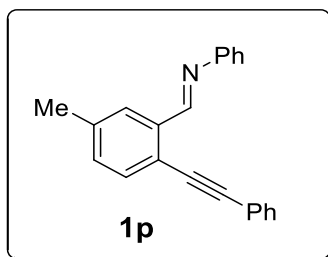

The compound **1p** was purified HPLC column using ethyl acetate/hexane:1/99 as the eluent; Brown oil (0.442 g, 1.49 mmol, 66%);  $^1\text{H}$  NMR (500 MHz,  $\text{CDCl}_3$ ):  $\delta$  9.08 (s, 1H), 8.09 (s, 1H), 7.53 ~ 7.50 (m, 3H), 7.41 (t,  $J = 8.0$  Hz, 2H), 7.35 ~ 7.34 (m, 3H), 7.28 ~ 7.25 (m, 4H), 2.44 (s, 3H);  $^{13}\text{C}$  NMR (125 MHz,  $\text{CDCl}_3$ ):  $\delta$  159.1, 152.1, 139.0, 136.4, 132.6, 131.9, 131.4, 129.2, 128.5, 128.4, 126.8, 126.0, 122.9, 122.3, 121.0, 94.7, 86.4, 21.4; HRMS (FD)  $m/z$ :  $[\text{M}]^+$  calcd. for  $\text{C}_{22}\text{H}_{17}\text{N}$ : 295.1366; found: 295.1361.

**Spectral data of (E)-N-(4-chloro-2-(phenylethynyl)benzylidene)aniline (1q):**

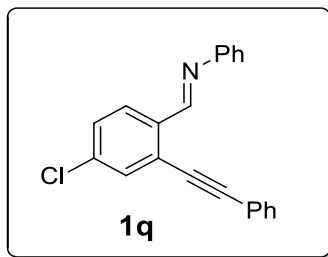

The compound **1q** was purified HPLC column using ethyl acetate/hexane:1/99 as the eluent; Brown oil (0.459 g, 1.45 mmol, 70%);  $^1\text{H}$  NMR (400 MHz,  $\text{CDCl}_3$ ):  $\delta$  9.01 (s, 1H), 8.20 (d,  $J = 8.4$  Hz, 1H), 7.58 (d,  $J = 2.4$  Hz, 1H), 7.52 ~ 7.50 (m, 2H), 7.42 ~ 7.35 (m, 6H), 7.26 ~ 7.23 (m, 3H);  $^{13}\text{C}$  NMR (100 MHz,  $\text{CDCl}_3$ ):  $\delta$  157.4, 151.7, 136.8, 135.1, 132.1, 131.6, 129.2, 129.0, 128.5, 127.9, 126.3, 122.2, 121.0, 96.4, 84.9; HRMS (ESI-TOF)  $m/z$ :  $[\text{M}+\text{H}]^+$  calcd. for  $\text{C}_{21}\text{H}_{15}\text{N}$ : 316.0893; found: 316.0894.

**Spectral data of (E)-N-(4-methyl-2-(phenylethynyl)benzylidene)aniline (1s):**

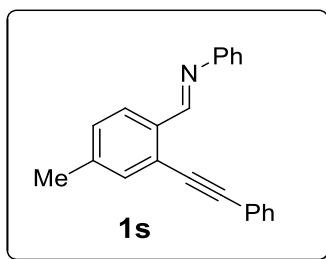

The compound **1s** was purified HPLC column using ethyl acetate/hexane:1/99 as the eluent; Brown oil (0.455 g, 1.54 mmol, 68%);  $^1\text{H}$  NMR (400 MHz,  $\text{CDCl}_3$ ):  $\delta$  9.04 (s, 1H), 8.15 (d,  $J$  = 8.0 Hz, 1H), 7.52 ~ 7.50 (m, 2H), 7.42 ~ 7.33 (m, 6H), 7.25 ~ 7.20 (m, 4H), 2.39 (s, 3H);  $^{13}\text{C}$  NMR (100 MHz,  $\text{CDCl}_3$ ):  $\delta$  158.8, 152.2, 141.3, 134.1, 133.0, 131.5, 129.8, 129.1, 128.6, 128.4, 126.5, 125.9, 124.9, 122.8, 121.0, 94.9, 86.4; HRMS (ESI-TOF)  $m/z$ :  $[\text{M}+\text{H}]^+$  calcd. for  $\text{C}_{22}\text{H}_{18}\text{N}$ : 296.1439; found: 296.1434.

**Spectral data of 2-diazo-1-phenylethanone (2k):**

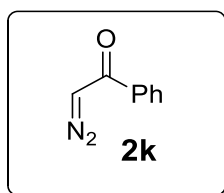

The compound **2k** was purified silica gel column using ethyl acetate/hexane:8/92 as the eluent; Yellow solid (0.554 g, 3.8 mmol, 76%); mp = 53-55°C;  $^1\text{H}$  NMR (500 MHz,  $\text{CDCl}_3$ ):  $\delta$  7.74 (d,  $J$  = 7.0 Hz, 2H), 7.52 (t,  $J$  = 6.0 Hz, 1H), 7.42 (d,  $J$  = 6.0 Hz, 2H), 5.88 (s, 1H);  $^{13}\text{C}$  NMR (100 MHz,  $\text{CDCl}_3$ ):  $\delta$  186.2, 136.5, 132.6, 128.5, 126.6, 54.1; HRMS (ESI-TOF)  $m/z$ :  $[\text{M}+\text{Na}]^+$  calcd. for  $\text{C}_8\text{H}_6\text{N}_2\text{O}$ : 169.0377; found: 169.0380.

**Spectral data of (2*S*,3*R*)-ethyl 1-phenyl-3-(2-(phenylethynyl)phenyl)aziridine-2-carboxylate (3a):**

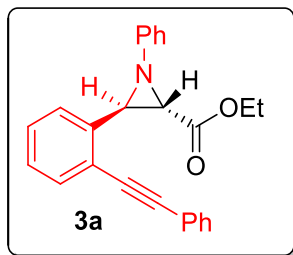

The compound **3a** was purified Neutral alumina column using ethyl acetate/hexane:2/98 as the eluent; Off-white solid (56 mg, 0.15 mmol, 71%); mp = 103-105°C; <sup>1</sup>H NMR (500 MHz, CDCl<sub>3</sub>): δ 7.55 ~ 7.54 (m, 1H), 7.48 ~ 7.46 (m, 2H), 7.37 ~ 7.28 (m, 6H), 7.22 (t, *J* = 8.0 Hz, 2H), 6.99 ~ 6.94 (m, 3H), 4.32 (d, *J* = 2.5 Hz, 1H), 4.06 ~ 3.95 (m, 2H), 3.19 (d, *J* = 2.0 Hz, 1H), 1.01 (t, *J* = 7.0 Hz, 3H); <sup>13</sup>C NMR (175 MHz, CDCl<sub>3</sub>): δ 167.2, 148.8, 138.6, 131.58, 131.52, 128.8, 128.5, 128.4, 128.2, 127.6, 125.6, 122.9, 122.89, 122.80, 119.8, 94.9, 86.7, 61.1, 45.3, 45.2, 13.8; HRMS (ESI-TOF) *m/z*: [M+Na]<sup>+</sup> calcd. for C<sub>25</sub>H<sub>21</sub>NO<sub>2</sub>Na: 390.1470; found: 390.1473.

**Spectral data of ethyl 2-diazo-2-(2,3-diphenyl-1,2-dihydroisoquinolin-1-yl)acetate(II):**

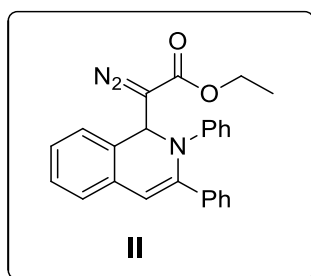

The compound **II** was purified silica gel column using ethyl acetate/hexane:4/96 as the eluent; Yellow solid (64.0 mg, 0.16 mmol, 76 %); <sup>1</sup>H NMR (700 MHz, CDCl<sub>3</sub>): δ 7.55 (d, *J* = 7.7 Hz, 2H), 7.34 ~ 7.30 (m, 2H), 7.27 ~ 7.17 (m, 7H), 7.12 (t, *J* = 7.7 Hz, 2H), 6.86 (t, *J* = 7.0 Hz, 1H), 6.63 (s, 1H), 6.16 (s, 1H), 4.36 (t, *J* = 5.6 Hz, 2H), 1.34 (s, 3H); <sup>13</sup>C NMR (175 MHz, CDCl<sub>3</sub>): δ 166.1, 146.3, 141.9, 137.1, 132.0, 128.6, 128.37, 128.33, 128.1, 127.5, 127.3, 127.1, 125.7, 124.6, 122.5, 122.3, 112.5, 60.9, 60.3, 14.4; HRMS (ESI-TOF) *m/z*: [M+H]<sup>+</sup> C<sub>25</sub>H<sub>22</sub>N<sub>3</sub>O<sub>2</sub>: 396.1712; found: 396.1714.

**Spectral data of ethyl 3,4-diphenyl-3H-benzo[d]azepine-1-carboxylate (III):**

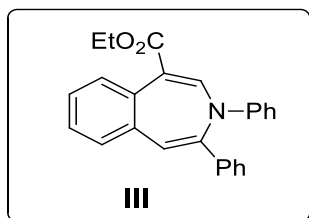

The compound **III** was purified silica gel column using ethyl acetate/hexane:4/96 as the eluent; Yellow solid (25.0 mg, 0.06 mmol, 32 %);  $^1\text{H}$  NMR (700 MHz,  $\text{CDCl}_3$ ):  $\delta$  8.03 (s, 1H), 7.47 (d,  $J = 7.7$  Hz, 1H), 7.32 (d,  $J = 7.7$  Hz, 2H), 7.28 ~ 7.20 (m, 6H), 7.07 (t,  $J = 8.4$  Hz, 2H), 6.77 ~ 6.73 (m, 4H), 4.34 (q,  $J = 7.0$  Hz, 2H), 1.37 (t,  $J = 7.0$  Hz, 3H);  $^{13}\text{C}$  NMR (175 MHz,  $\text{CDCl}_3$ ):  $\delta$  167.2, 147.8, 147.4, 143.2, 137.2, 136.8, 133.9, 130.1, 128.8, 128.7, 128.6, 127.9, 127.3, 126.9, 126.3, 124.9, 124.5, 120.1, 114.3, 61.0, 14.3; HRMS (ESI-TOF)  $m/z$ :  $[\text{M}+\text{Na}]^+$   $\text{C}_{25}\text{H}_{21}\text{NO}_2\text{Na}$ : 390.1470.; found: 390.1459.

**Spectral data of ethyl 3,4-diphenyl-3H-benzo[d]azepine-2-carboxylate (4a):**

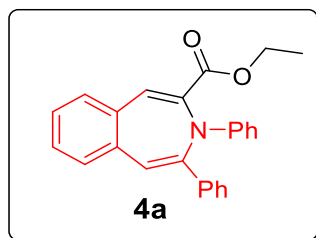

The compound **4a** was purified silica gel column using ethyl acetate/hexane:3/97 as the eluent; Yellow solid (59.5 mg, 0.16 mmol, 76%); mp = 130-132°C;  $^1\text{H}$  NMR (700 MHz,  $\text{CDCl}_3$ ):  $\delta$  8.04 (d,  $J = 7.7$  Hz, 2H), 8.00 (s, 1H), 7.41 ~ 7.29 (m, 7H), 7.23 (t,  $J = 7.7$  Hz, 1H), 6.98 (t,  $J = 8.4$  Hz, 2H), 6.65 (t,  $J = 7.0$  Hz, 1H), 6.54 (d,  $J = 8.4$  Hz, 2H), 4.35 (d,  $J = 7.0$  Hz, 2H), 1.35 (t,  $J = 7.7$  Hz, 3H);  $^{13}\text{C}$  NMR (175 MHz,  $\text{CDCl}_3$ ):  $\delta$  164.8, 145.7, 145.6, 138.8, 136.9, 136.8, 134.5, 133.2, 131.1, 130.3, 128.8, 128.6, 128.5, 127.0, 126.7, 124.2, 118.4, 112.5, 61.5, 14.3; HRMS (ESI-TOF)  $m/z$ :  $[\text{M}+\text{Na}]^+$  calcd. for  $\text{C}_{25}\text{H}_{21}\text{NO}_2\text{Na}$ : 390.1470; found: 390.1474.



**Spectral data of ethyl 3-(4-chlorophenyl)-4-phenyl-3H-benzo[d]azepine-2-carboxylate (4b):**

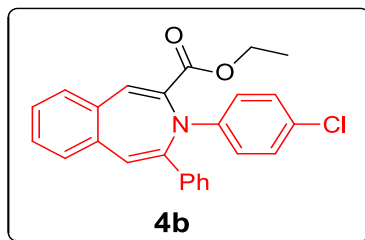

The compound **4b** was purified on silica gel column using ethyl acetate/hexane:3/97 as the eluent; Yellow solid (53 mg, 0.13 mmol, 69%); mp = 172-174°C; <sup>1</sup>H NMR (700 MHz, CDCl<sub>3</sub>): δ 8.02 ~ 8.01 (m, 3H), 7.42 ~ 7.31 (m, 7H), 7.26 (t, *J* = 7.7 Hz, 1H), 6.93 (d, *J* = 9.1 Hz, 2H), 6.47 (d, *J* = 9.1 Hz, 2H), 4.35 (s, 2H), 1.36 (t, *J* = 7.0 Hz, 3H); <sup>13</sup>C NMR (175 MHz, CDCl<sub>3</sub>): δ 164.4, 145.3, 144.3, 139.2, 136.7, 136.5, 134.1, 133.1, 131.2, 130.4, 129.1, 128.8, 128.7, 128.4, 127.2, 126.6, 124.4, 123.4, 113.6, 61.6, 14.3; HRMS (ESI-TOF) *m/z*: [M+Na]<sup>+</sup> calcd. for C<sub>25</sub>H<sub>20</sub>ClNO<sub>2</sub>Na: 424.1080; found: 424.1084.

**Spectral data of ethyl 3-(4-Bromophenyl)-4-phenyl-3H-benzo[d]azepine-2-carboxylate (4c):**

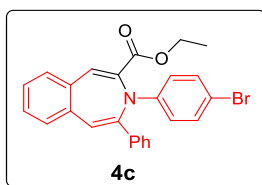

The compound **4c** was purified on silica gel column using ethyl acetate/hexane:3/97 as the eluent; Yellow solid (48 mg, 0.10 mmol, 64%); mp = 175-177°C; <sup>1</sup>H NMR (700 MHz, CDCl<sub>3</sub>): δ 7.99 ~ 7.98 (m, 3H), 7.41 ~ 7.29 (m, 7H), 7.25 (t, *J* = 7.0 Hz, 1H), 7.04 (d, *J* = 8.4 Hz, 2H), 6.39 (d, *J* = 9.1 Hz, 2H), 4.33 (s, 2H), 1.34 (t, *J* = 7.7 Hz, 3H); <sup>13</sup>C NMR (175 MHz, CDCl<sub>3</sub>): δ 164.4, 145.1, 144.8, 139.2, 136.6, 136.4, 134.0, 133.0, 131.27, 131.21, 130.4, 129.1, 128.8, 128.7, 127.2, 126.6, 124.4, 114.1, 110.6, 61.6, 14.3; HRMS (ESI-TOF) *m/z*: [M+Na]<sup>+</sup> calcd. for C<sub>25</sub>H<sub>20</sub>BrNO<sub>2</sub>Na: 468.0575; found: 468.0579.

**Spectral data of ethyl 3-(4-fluorophenyl)-4-phenyl-3H-benzo[d]azepine-2-carboxylate (4d):**

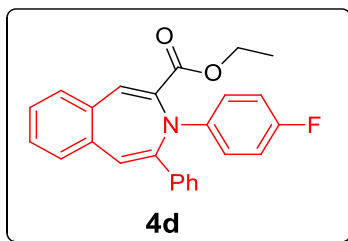

The compound **4d** was purified on silica gel column using ethyl acetate/hexane:4/96 as the eluent; Yellow oil (56 mg, 0.14 mmol, 73%);  $^1\text{H}$  NMR (700 MHz,  $\text{CDCl}_3$ ):  $\delta$  8.03 (d,  $J = 7.7$  Hz, 2H), 8.01 (s, 1H), 7.41 ~ 7.36 (m, 4H), 7.32 ~ 7.30 (m, 3H), 7.25 (t,  $J = 7.7$  Hz, 1H), 6.69 (t,  $J = 8.4$  Hz, 2H), 6.48 ~ 6.46 (m, 2H), 4.36 (q,  $J = 7.0$  Hz, 2H), 1.36 (t,  $J = 7.0$  Hz, 3H);  $^{13}\text{C}$  NMR (175 MHz,  $\text{CDCl}_3$ ):  $\delta$  164.6, 157.1, 155.8, 145.8, 141.96, 141.95, 139.1, 136.8, 134.6, 133.1, 131.1, 130.3, 128.9, 128.7, 128.6, 127.0, 126.6, 124.3, 115.0, 114.9, 113.19, 113.15, 61.5, 14.2.; HRMS (ESI-TOF)  $m/z$ :  $[\text{M}+\text{Na}]^+$  calcd. for  $\text{C}_{25}\text{H}_{20}\text{FNO}_2\text{Na}$ : 408.1375; found: 408.1376.

**Spectral data of ethyl 4-phenyl-3-(*p*-tolyl)-3*H*-benzo[d]azepine-2-carboxylate (4e):**

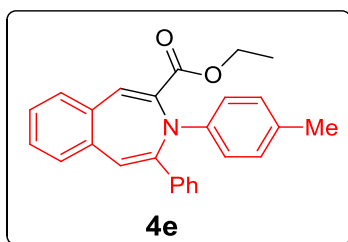

The compound **4e** was purified on silica gel column using ethyl acetate/hexane:3/97 as the eluent; Yellow oil (52 mg, 0.13 mmol, 68%);  $^1\text{H}$  NMR (700 MHz,  $\text{CDCl}_3$ ):  $\delta$  8.00 (d,  $J = 7.7$  Hz, 2H), 7.94 (s, 1H), 7.35 ~ 7.30 (m, 4H), 7.27 ~ 7.24 (m, 3H), 7.20 ~ 7.17 (m, 1H), 6.75 (d,  $J = 9.1$  Hz, 2H), 6.41 (d,  $J = 9.1$  Hz, 2H), 4.31 (d,  $J = 6.3$  Hz, 2H), 2.07 (s, 3H), 1.32 (t,  $J = 7.0$  Hz, 3H);  $^{13}\text{C}$  NMR (175 MHz,  $\text{CDCl}_3$ ):  $\delta$  164.9, 146.0, 143.4, 138.8, 137.2, 136.9, 134.8, 133.3, 131.1, 130.3, 129.0, 128.8, 128.6, 128.4, 127.5, 126.9, 126.7, 124.1, 112.4, 61.4, 20.2, 14.3; HRMS (ESI-TOF)  $m/z$ :  $[\text{M}+\text{Na}]^+$  calcd. for  $\text{C}_{26}\text{H}_{23}\text{NO}_2\text{Na}$ : 404.1626; found: 404.1630.

**Spectral data of ethyl 3-(3-chlorophenyl)-4-phenyl-3*H*-benzo[d]azepine-2-carboxylate (4f):**

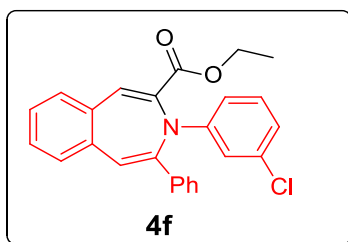

The compound **4f** was purified on silica gel column using ethyl acetate/hexane: 4/96 as the eluent; Yellow oil (49.6 mg, 0.12 mmol, 65%);  $^1\text{H}$  NMR (500 MHz,  $\text{CDCl}_3$ ):  $\delta$  8.01 ~ 7.99 (m, 3H), 7.42 ~ 7.29 (m, 7H), 7.27 ~ 7.22 (m, 1H), 6.86 (t,  $J = 8.0$  Hz, 1H), 6.60 (d,  $J = 8.0$  Hz, 1H), 6.49 ~ 6.48 (m, 1H), 6.39 (dd,  $J = 2.5$  Hz, 8.5 Hz, 1H), 4.34 (t,  $J = 7.0$  Hz, 2H), 1.34 (t,  $J = 7.5$  Hz, 3H);  $^{13}\text{C}$  NMR (175 MHz,  $\text{CDCl}_3$ ):  $\delta$  164.3, 146.9, 144.8, 139.3, 136.6, 134.3, 133.7, 133.0, 131.2, 130.4, 129.4, 129.1, 128.8, 128.7, 127.2, 126.6, 124.5, 118.5, 112.4, 110.8, 61.6, 14.3 ; HRMS (ESI-TOF)  $m/z$ :  $[\text{M}+\text{Na}]^+$  calcd. for  $\text{C}_{25}\text{H}_{20}\text{ClNO}_2\text{Na}$ : 424.1080; found: 424.1087.

**Spectral data of ethyl 4-phenyl-3-(*m*-tolyl)-3*H*-benzo[d]azepine-2-carboxylate (4g):**

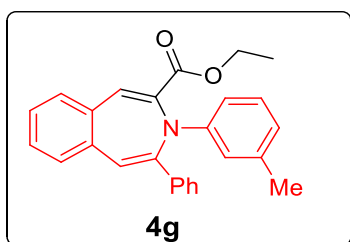

The compound **4g** was purified on silica gel column using ethyl acetate/hexane:3/97 as the eluent; Yellow oil (47 mg, 0.12 mmol, 60%);  $^1\text{H}$  NMR (500 MHz,  $\text{CDCl}_3$ ):  $\delta$  8.03 (d,  $J = 7.5$  Hz, 2H), 7.98 (s, 1H), 7.40 ~ 7.27 (m, 7H), 7.23 ~ 7.20 (m, 1H), 6.85 (t,  $J = 7.5$  Hz, 1H), 6.47 (d,  $J = 7.5$  Hz, 1H), 6.34 ~ 6.32 (m, 2H), 4.34 (d,  $J = 7.0$  Hz, 2H), 2.11 (s, 3H), 1.34 (t,  $J = 7.0$  Hz, 3H);  $^{13}\text{C}$  NMR (175 MHz,  $\text{CDCl}_3$ ):  $\delta$  164.9, 145.75, 145.70, 138.7, 138.1, 137.0, 136.9, 134.6, 133.3, 131.1, 130.3, 128.8, 128.6, 128.4, 128.3, 126.9, 126.7, 124.2, 119.4, 113.0, 109.8, 61.4, 21.7, 14.3; HRMS (ESI-TOF)  $m/z$ :  $[\text{M}+\text{Na}]^+$  calcd. for  $\text{C}_{26}\text{H}_{23}\text{NO}_2\text{Na}$ : 404.1626; found: 404.1622.

**Spectral data of ethyl ethyl 3-(2-chlorophenyl)-4-phenyl-3*H*-benzo[d]azepine-2-carboxylate (4h):**

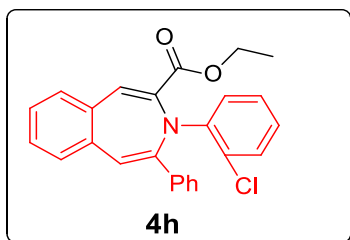

The compound **4h** was purified on silica gel column using ethyl acetate/hexane:5/95 as the eluent; Yellow oil (43.5 mg, 0.10 mmol, 57%);  $^1\text{H}$  NMR (500 MHz,  $\text{CDCl}_3$ ):  $\delta$  8.02 (d,  $J = 7.5$  Hz, 2H),

7.88 (s, 1H), 7.50 (s, 1H), 7.45 (t,  $J = 7.5$  Hz, 2H), 7.36 ~ 7.30 (m, 4H), 7.28 ~ 7.26 (m, 1H), 7.08 (d,  $J = 7.5$  Hz, 1H), 6.76 (d,  $J = 7.5$  Hz, 1H), 6.69 (d,  $J = 7.5$  Hz, 1H), 6.58 (t,  $J = 7.0$  Hz, 1H), 4.28 (q,  $J = 7.0$  Hz, 2H), 1.29 (t,  $J = 7.5$  Hz, 3H);  $^{13}\text{C}$  NMR (175 MHz,  $\text{CDCl}_3$ ):  $\delta$  165.9, 145.1, 141.7, 137.1, 136.5, 136.0, 134.6, 133.4, 131.8, 130.9, 129.9, 128.6, 128.5, 128.4, 127.1, 126.8, 126.7, 124.9, 120.7, 120.2, 118.5, 61.2, 14.2; HRMS (ESI-TOF)  $m/z$ :  $[\text{M}+\text{Na}]^+$  calcd. for  $\text{C}_{25}\text{H}_{20}\text{ClNO}_2\text{Na}$ : 424.1080; found: 424.1077.

**Spectral data of ethyl 4-(4-chlorophenyl)-3-phenyl-3H-benzo[d]azepine-2-carboxylate (4i):**

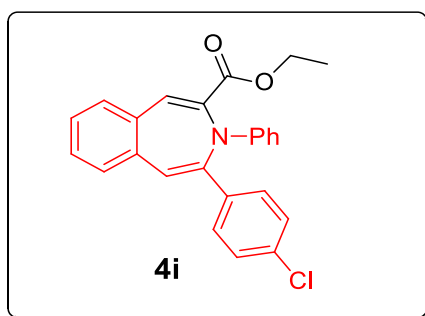

The compound **4i** was purified on silica gel column using ethyl acetate/hexane:3/97 as the eluent; Yellow solid (53 mg, 0.13 mmol, 70%); mp = 122-124°C;  $^1\text{H}$  NMR (700 MHz,  $\text{CDCl}_3$ ):  $\delta$  7.98 ~ 7.97 (m, 3H), 7.40 ~ 7.36 (m, 2H), 7.32 ~ 7.29 (m, 4H), 7.24 (t,  $J = 7.7$  Hz, 1H), 6.99 (t,  $J = 9.1$  Hz, 2H), 6.66 (t,  $J = 7.7$  Hz, 1H), 6.50 (d,  $J = 8.4$  Hz, 2H), 4.34 (s, 2H), 1.35 (t,  $J = 7.0$  Hz, 3H);  $^{13}\text{C}$  NMR (175 MHz,  $\text{CDCl}_3$ ):  $\delta$  164.7, 145.3, 144.5, 138.9, 136.6, 135.5, 134.4, 134.3, 133.2, 131.2, 130.3, 128.9, 128.8, 128.5, 128.0, 127.2, 124.5, 118.6, 112.4, 61.6, 14.3; HRMS (ESI-TOF)  $m/z$ :  $[\text{M}+\text{Na}]^+$  calcd. for  $\text{C}_{25}\text{H}_{20}\text{ClNO}_2\text{Na}$ : 424.1080; found: 424.1080.

**Spectral data of ethyl 3-phenyl-4-(*p*-tolyl)-3H-benzo[d]azepine-2-carboxylate (4j):**

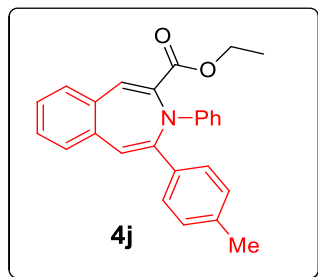

The compound **4j** was purified on silica gel column using ethyl acetate/hexane:4/96 as the eluent; Yellow solid (58 mg, 0.15 mmol, 72%); mp = 119-121°C;  $^1\text{H}$  NMR (700 MHz,  $\text{CDCl}_3$ ):  $\delta$  7.99 (s, 1H), 7.92 (d,  $J = 8.4$  Hz, 2H), 7.38 (q,  $J = 7.7$  Hz, 2H), 7.29 ~ 7.28 (m, 2H), 7.23 ~ 7.21 (m, 1H), 7.16 (d,  $J = 7.7$  Hz, 2H), 6.98 (t,  $J = 8.4$  Hz, 2H), 6.64 (t,  $J = 7.7$  Hz, 1H), 6.54 (d,  $J = 8.4$  Hz, 2H), 4.34 (s, 2H), 2.35 (s, 3H), 1.35 (t,  $J = 7.0$  Hz, 3H);  $^{13}\text{C}$  NMR (175 MHz,  $\text{CDCl}_3$ ):  $\delta$  164.8, 145.8, 145.6, 138.9, 138.5, 137.0, 134.4, 134.0, 133.2, 131.1, 130.2, 129.4, 128.8, 128.4, 126.8, 126.6, 123.3, 118.2, 112.4, 61.4, 21.2, 14.3; HRMS (ESI-TOF)  $m/z$ :  $[\text{M}+\text{Na}]^+$  calcd. for  $\text{C}_{26}\text{H}_{23}\text{NO}_2\text{Na}$ : 404.1626; found: 404.1634.

**Spectral data of ethyl 4-(4-methoxyphenyl)-3-phenyl-3H-benzo[d]azepine-2-carboxylate (4k):**

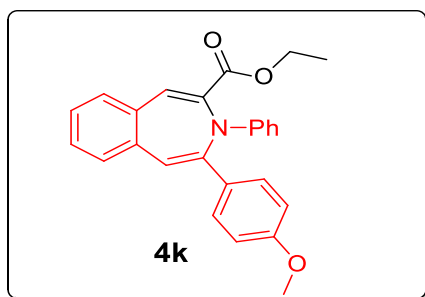

The compound **4k** was purified on silica gel column using ethyl acetate/hexane:4/96 as the eluent; Yellow oil (57 mg, 0.14 mmol, 74%);  $^1\text{H}$  NMR (500 MHz,  $\text{CDCl}_3$ ):  $\delta$  7.99 ~ 7.96 (m, 3H), 7.39 ~ 7.35 (m, 2H), 7.28 (t,  $J = 7.0$  Hz, 1H), 7.22 ~ 7.19 (m, 2H), 6.99 (t,  $J = 8.00$  Hz, 2H), 6.88 (d,  $J = 9.0$  Hz, 2H), 6.64 (t,  $J = 7.5$  Hz, 1H), 6.54 (d,  $J = 8.0$  Hz, 2H), 4.34 (s, 2H), 3.80 (s, 3H), 1.35 (t,  $J = 7.0$  Hz, 3H);  $^{13}\text{C}$  NMR (175 MHz,  $\text{CDCl}_3$ ):  $\delta$  164.8, 159.9, 145.7, 145.3, 139.0, 137.1, 134.2, 133.0, 131.1, 130.1, 129.4, 128.8, 128.4, 128.2, 126.6, 122.2, 118.2, 114.0, 112.4, 61.4, 55.2, 14.3; HRMS (ESI-TOF)  $m/z$ :  $[\text{M}+\text{Na}]^+$  calcd. for  $\text{C}_{26}\text{H}_{23}\text{NO}_3\text{Na}$ : 420.1575; found: 420.1578.

**Spectral data of ethyl 4-(naphthalen-2-yl)-3-phenyl-3H-benzo[d]azepine-2-carboxylate (4l):**

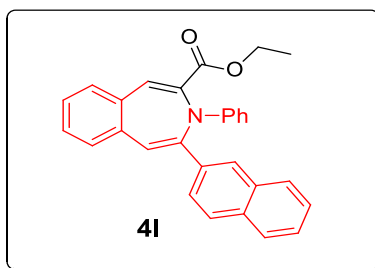

The compound **4l** was purified on silica gel column using ethyl acetate/hexane:3/97 as the eluent; Yellow solid (58 mg, 0.13 mmol, 76%); mp = 185-187°C; <sup>1</sup>H NMR (700 MHz, CDCl<sub>3</sub>): δ 8.59 (s, 1H), 8.12 (d, *J* = 8.4 Hz, 1H), 8.06 (s, 1H), 7.86 ~ 7.81 (m, 3H), 7.49 (s, 1H), 7.46 ~ 7.43 (m, 4H), 7.32 (t, *J* = 7.7 Hz, 1H), 7.26 ~ 7.23 (m, 1H), 7.00 (t, *J* = 7.7 Hz, 2H), 6.67 (t, *J* = 7.7 Hz, 1H), 6.62 (d, *J* = 8.4 Hz, 2H), 4.41 (q, *J* = 7.0 Hz, 2H), 1.41 (t, *J* = 7.0 Hz, 3H); <sup>13</sup>C NMR (175 MHz, CDCl<sub>3</sub>): δ 164.8, 145.8, 145.6, 138.9, 136.8, 134.6, 134.2, 133.5, 133.3, 133.2, 131.1, 130.4, 128.9, 128.7, 128.5, 128.3, 127.5, 127.0, 126.6, 126.3, 126.1, 124.8, 124.0, 118.4, 112.5, 61.5, 14.4; HRMS (ESI-TOF) *m/z*: [M+Na]<sup>+</sup> calcd. for C<sub>29</sub>H<sub>23</sub>NO<sub>2</sub>Na: 440.1626; found: 440.1626.

**Spectral data of butyl 4-butyl-3-phenyl-3H-benzo[d]azepine-2-carboxylate (4m):**

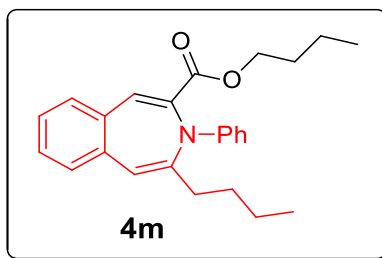

The compound **4m** was purified on silica gel column using ethyl acetate/hexane:4/96 as the eluent; Yellow oil (57 mg, 0.15 mmol, 66%); <sup>1</sup>H NMR (400 MHz, CDCl<sub>3</sub>): δ 7.81 (s, 1H), 7.34 (d, *J* = 7.6 Hz, 1H), 7.25 ~ 7.23 (m, 2H), 7.19 ~ 7.15 (m, 1H), 7.07 (t, *J* = 8.8 Hz, 2H), 6.68 (t, *J* = 7.2 Hz, 1H), 6.58 ~ 6.52 (m, 3H), 4.24 (t, *J* = 6.8 Hz, 2H), 2.54 (t, *J* = 7.6 Hz, 2H), 1.70 ~ 1.61 (m, 4H), 1.39 ~ 1.31 (m, 4H), 0.93 ~ 0.87 (m, 6H); <sup>13</sup>C NMR (175 MHz, CDCl<sub>3</sub>): δ 165.0, 149.6, 145.0, 137.3, 137.0, 134.4, 133.1, 130.9, 129.6, 128.6, 128.5, 126.3, 124.9, 118.0, 111.6, 65.1, 34.4, 30.71, 30.70, 22.4, 19.0, 13.9, 13.6; HRMS (ESI-TOF) *m/z*: [M+Na]<sup>+</sup> calcd. for C<sub>25</sub>H<sub>29</sub>NO<sub>2</sub>Na: 398.2096; found: 398.2098.

**Spectral data of ethyl 8-chloro-3,4-diphenyl-3H-benzo[d]azepine-2-carboxylate (4n):**

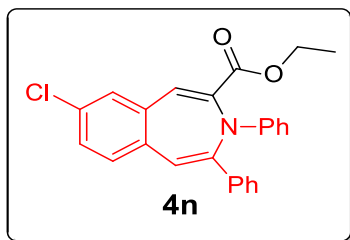

The compound **4n** was purified silica gel column using ethyl acetate/hexane:3/97 as the eluent;

Yellow solid (54 mg, 0.13 mmol, 71%); mp = 191-193°C;  $^1\text{H NMR}$  (700 MHz,  $\text{CDCl}_3$ ):  $\delta$  8.02 (d,  $J = 7.0$  Hz, 2H), 7.91 (s, 1H), 7.39 ~ 7.35 (m, 3H), 7.31 (t,  $J = 7.0$  Hz, 2H), 7.28 (s, 1H), 7.26 ~ 7.24 (m, 1H), 6.99 (t,  $J = 7.0$  Hz, 2H), 6.68 (t,  $J = 7.7$  Hz, 1H), 6.52 (d,  $J = 7.7$  Hz, 2H), 4.35 (q,  $J = 6.3$  Hz, 2H), 1.35 (t,  $J = 7.0$  Hz, 3H);  $^{13}\text{C NMR}$  (175 MHz,  $\text{CDCl}_3$ ):  $\delta$  164.4, 146.2, 145.4, 137.5, 136.7, 135.7, 135.2, 134.7, 132.6, 131.6, 130.4, 128.9, 128.7, 128.5, 126.7, 123.3, 118.7, 112.5, 61.6, 14.2; HRMS (ESI-TOF)  $m/z$ :  $[\text{M}+\text{Na}]^+$   $\text{C}_{25}\text{H}_{20}\text{ClNO}_2\text{Na}$ : 424.1080; found: 424.1074.

**Spectral data of ethyl 8-methoxy-3,4-diphenyl-3H-benzo[d]azepine-2-carboxylate (4o):**

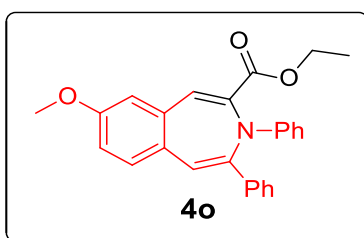

The compound **4o** was purified silica gel column using ethyl acetate/hexane:3/97 as the eluent; Yellow oil (57.4 mg, 0.14 mmol, 75%);  $^1\text{H NMR}$  (700 MHz,  $\text{CDCl}_3$ ):  $\delta$  8.02 (d,  $J = 7.0$  Hz, 2H), 7.97 (s, 1H), 7.35 (t,  $J = 7.7$  Hz, 2H), 7.32 ~ 7.28 (m, 3H), 6.99 (t,  $J = 7.7$  Hz, 2H), 6.89 ~ 6.87 (m, 2H), 6.66 (t,  $J = 7.0$  Hz, 1H), 6.55 (d,  $J = 8.4$  Hz, 2H), 4.35 (s, 2H), 3.78 (s, 3H), 1.35 (t,  $J = 7.0$  Hz, 3H);  $^{13}\text{C NMR}$  (175 MHz,  $\text{CDCl}_3$ ):  $\delta$  164.8, 158.1, 145.7, 143.2, 138.6, 137.0, 134.5, 134.3, 131.8, 129.9, 128.6, 128.4, 128.1, 126.4, 124.0, 118.3, 116.3, 114.3, 112.3, 61.5, 55.3, 14.2; HRMS (ESI-TOF)  $m/z$ :  $[\text{M}+\text{Na}]^+$   $\text{C}_{26}\text{H}_{23}\text{NO}_3\text{Na}$ : 420.1575; found: 420.1576.

**Spectral data of ethyl 8-methyl-3,4-diphenyl-3H-benzo[d]azepine-2-carboxylate (4p):**

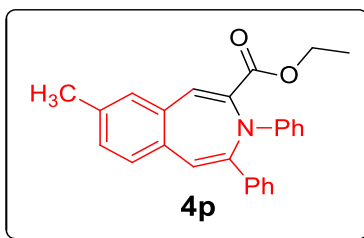

The compound **4p** was purified silica gel column using ethyl acetate/hexane:4/96 as the eluent; Yellow solid (57 mg, 0.14 mmol, 74%); mp = 170-172°C;  $^1\text{H NMR}$  (700 MHz,  $\text{CDCl}_3$ ):  $\delta$  8.04 (d,  $J = 7.7$  Hz, 2H), 7.98 (s, 1H), 7.37 ~ 7.33 (m, 3H), 7.31 ~ 7.28 (m, 2H), 7.22 (s, 1H), 7.11 (d,

$J = 8.4$  Hz, 1H), 6.99 (t,  $J = 8.4$  Hz, 2H), 6.65 (t,  $J = 7.0$  Hz, 1H), 6.54 (d,  $J = 8.4$  Hz, 2H), 4.35 (s, 2H), 2.32 (s, 3H), 1.35 (t,  $J = 7.0$  Hz, 3H);  $^{13}\text{C}$  NMR (175 MHz,  $\text{CDCl}_3$ ):  $\delta$  164.9, 145.8, 144.6, 139.0, 137.0, 136.9, 134.2, 134.1, 133.1, 131.4, 130.3, 129.9, 128.6, 128.4, 128.3, 126.5, 124.2, 118.2, 112.4, 61.4, 21.0, 14.2; HRMS (ESI-TOF)  $m/z$ :  $[\text{M}+\text{Na}]^+$   $\text{C}_{26}\text{H}_{23}\text{NO}_2\text{Na}$ : 404.1626; found: 404.1626.

**Spectral data of ethyl 7-chloro-3,4-diphenyl-3H-benzo[d]azepine-2-carboxylate (4q):**

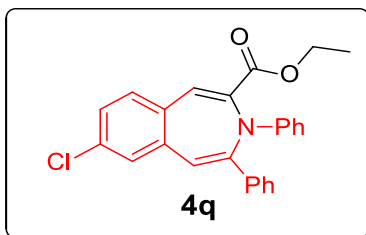

The compound **4q** was purified silica gel column using ethyl acetate/hexane:4/96 as the eluent; Yellow solid (59.5 mg, 0.14 mmol, 78%); mp = 188-190°C;  $^1\text{H}$  NMR (700 MHz,  $\text{CDCl}_3$ ):  $\delta$  8.04 (d,  $J = 7.7$  Hz, 2H), 7.95 (s, 1H), 7.38 (t,  $J = 7.0$  Hz, 3H), 7.34 ~ 7.31 (m, 2H), 7.25 (s, 1H), 7.19 (dd,  $J = 2.1$  Hz, 8.4 Hz, 1H), 7.01 (t,  $J = 8.4$  Hz, 2H), 6.69 (t,  $J = 7.0$  Hz, 1H), 6.54 (d,  $J = 7.7$  Hz, 2H), 4.36 (q,  $J = 7.0$  Hz, 2H), 1.36 (t,  $J = 7.0$  Hz, 3H);  $^{13}\text{C}$  NMR (175 MHz,  $\text{CDCl}_3$ ):  $\delta$  164.5, 147.0, 145.4, 138.3, 137.9, 136.6, 134.9, 134.6, 132.3, 131.6, 129.8, 128.8, 128.7, 128.5, 127.2, 126.8, 123.0, 118.7, 112.5, 61.6, 14.2; HRMS (ESI-TOF)  $m/z$ :  $[\text{M}+\text{Na}]^+$   $\text{C}_{25}\text{H}_{20}\text{ClNO}_2\text{Na}$ : 424.1080; found: 424.1082.

**Spectral data of ethyl 7-fluoro-3,4-diphenyl-3H-benzo[d]azepine-2-carboxylate (4r):**

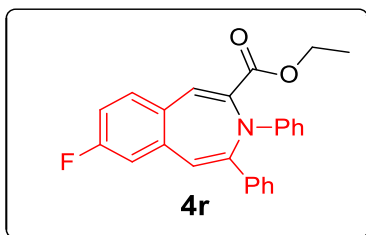

The compound **4r** was purified silica gel column using ethyl acetate/hexane:5/95 as the eluent; Yellow oil (60 mg, 0.15 mmol, 77%);  $^1\text{H}$  NMR (700 MHz,  $\text{CDCl}_3$ ):  $\delta$  8.05 (d,  $J = 7.0$  Hz, 2H), 7.97 (s, 1H), 7.39 ~ 7.36 (m, 3H), 7.34 ~ 7.32 (m, 1H), 7.26 (s, 1H), 7.08 (dd,  $J = 2.1$  Hz, 9.1 Hz, 1H), 7.01 (t,  $J = 8.4$  Hz, 2H), 6.96 ~ 6.93 (m, 1H), 6.68 (t,  $J = 7.0$  Hz, 1H), 6.55 (d,  $J = 7.7$  Hz, 2H), 4.35 (d,  $J = 7.0$  Hz, 2H), 1.36 (t,  $J = 7.7$  Hz, 3H);  $^{13}\text{C}$  NMR (175 MHz,  $\text{CDCl}_3$ ):  $\delta$  164.6,



162.9, 161.5, 146.7, 145.4, 139.18, 139.13, 138.0, 136.6, 134.0, 133.3, 133.2, 129.6, 129.5, 128.8, 128.7, 128.5, 126.8, 123.2, 118.6, 116.2, 116.1, 114.8, 114.6, 112.5, 61.5, 14.2; HRMS (ESI-TOF)  $m/z$ :  $[M+Na]^+$   $C_{25}H_{20}FNO_2Na$ : 408.1375; found: 408.1380.

**Spectral data of ethyl 7-methyl-3,4-diphenyl-3*H*-benzo[*d*]azepine-2-carboxylate (**4s**):**

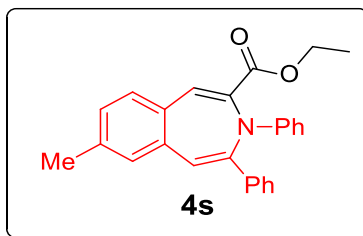

The compound **4s** was purified silica gel column using ethyl acetate/hexane:3/97 as the eluent; Yellow oil (33 mg, 0.08 mmol, 42%);  $^1H$  NMR (500 MHz,  $CDCl_3$ ):  $\delta$  8.03 (d,  $J = 7.5$  Hz, 2H), 7.98 (s, 1H), 7.36 ~ 7.29 (m, 5H), 7.20 (s, 1H), 7.05 (t,  $J = 7.5$  Hz, 1H), 6.97 (t,  $J = 8.5$  Hz, 2H), 6.63 (t,  $J = 7.5$  Hz, 1H), 6.52 (d,  $J = 8.5$  Hz, 2H), 4.33 (s, 2H), 2.33 (s, 3H), 1.34 (t,  $J = 7.0$  Hz, 3H);  $^{13}C$  NMR (100 MHz,  $CDCl_3$ ):  $\delta$  164.9, 145.8, 145.2, 139.1, 138.9, 137.0, 136.8, 133.5, 131.2, 130.7, 128.7, 128.5, 128.1, 126.6, 124.3, 118.3, 112.4, 61.4, 21.3, 14.3; HRMS (ESI-TOF)  $m/z$ :  $[M+Na]^+$   $C_{26}H_{23}NO_2Na$ : 404.1626; found: 404.1616.

**Spectral data of isobutyl 3,4-diphenyl-3*H*-benzo[*d*]azepine-2-carboxylate (**5b**):**

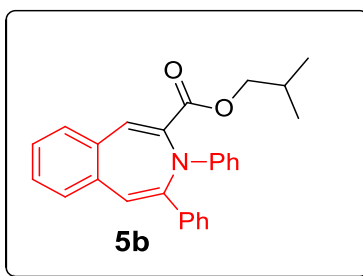

The compound **5b** was purified silica gel column using ethyl acetate/hexane:3/97 as the eluent; Yellow oil (61 mg, 0.15 mmol, 73%);  $^1H$  NMR (400 MHz,  $CDCl_3$ ):  $\delta$  8.04 ~ 7.99 (m, 3H), 7.41 ~ 7.23 (m, 8H), 6.98 (t,  $J = 7.2$  Hz, 2H), 6.65 (t,  $J = 7.2$  Hz, 1H), 6.54 (d,  $J = 8.8$  Hz, 2H), 4.07 (d,  $J = 6.8$  Hz, 2H), 2.06 ~ 2.00 (m, 1H), 0.93 (d,  $J = 6.8$  Hz, 6H);  $^{13}C$  NMR (175 MHz,  $CDCl_3$ ):  $\delta$  164.9, 145.7, 145.6, 138.8, 137.0, 136.8, 134.6, 133.2, 131.1, 130.3, 128.8, 128.7, 128.4, 127.0, 126.6, 124.3, 118.4, 112.5, 71.8, 27.8, 19.2, 19.1; HRMS (ESI-TOF)  $m/z$ :  $[M+Na]^+$   $C_{27}H_{25}NO_2Na$ : 418.1783; found: 418.1785.

**Spectral data of benzyl 3,4-diphenyl-3*H*-benzo[d]azepine-2-carboxylate (5c):**

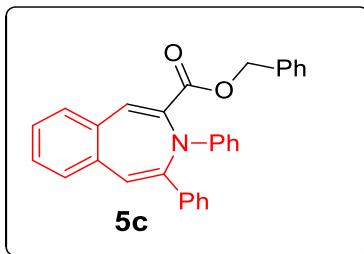

The compound **5c** was purified silica gel column using ethyl acetate/hexane:3/97 as the eluent; Yellow solid (63 mg, 0.14 mmol, 70%); mp = 133-135°C; <sup>1</sup>H NMR (700 MHz, CDCl<sub>3</sub>): δ 8.03 (s, 1H), 7.97 (d, *J* = 7.7 Hz, 2H), 7.39 ~ 7.21 (m, 13H), 6.98 (t, *J* = 7.7 Hz, 2H), 6.66 (t, *J* = 7.0 Hz, 1H), 6.54 (d, *J* = 7.7 Hz, 2H), 5.32 (s, 2H); <sup>13</sup>C NMR (175 MHz, CDCl<sub>3</sub>): δ 164.6, 145.8, 145.5, 139.3, 136.9, 135.5, 134.3, 133.2, 131.2, 130.3, 128.9, 128.6, 128.58, 128.56, 128.52, 128.4, 128.3, 127.0, 126.6, 124.2, 118.5, 67.4; HRMS (ESI-TOF) *m/z*: [M+Na]<sup>+</sup> C<sub>30</sub>H<sub>23</sub>NO<sub>2</sub>Na: 452.1626; found: 452.1621.

**Spectral data of butyl 3,4-diphenyl-3*H*-benzo[d]azepine-2-carboxylate (5d):**

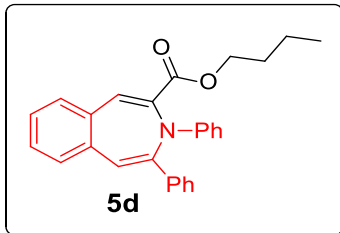

The compound **5d** was purified silica gel column using ethyl acetate/hexane:2/98 as the eluent; Yellow solid (67 mg, 0.16 mmol, 79%); mp = 132-134°C; <sup>1</sup>H NMR (400 MHz, CDCl<sub>3</sub>): δ 8.06 (d, *J* = 8.0 Hz, 2H), 8.01 (s, 1H), 7.43 ~ 7.30 (m, 7H), 7.27 ~ 7.23 (m, 1H), 7.01 (t, *J* = 8.8 Hz, 2H), 6.67 (t, *J* = 8.4 Hz, 1H), 6.56 (d, *J* = 8.4 Hz, 2H), 4.31 (t, *J* = 5.6 Hz, 2H), 1.76 ~ 1.69 (m, 2H), 1.43 ~ 1.34 (m, 2H), 0.94 (t, *J* = 7.6 Hz, 3H); <sup>13</sup>C NMR (175 MHz, CDCl<sub>3</sub>): δ 164.9, 145.7, 145.6, 138.7, 137.0, 136.8, 134.6, 133.2, 131.1, 130.3, 128.8, 128.6, 128.4, 127.0, 126.6, 124.3, 118.4, 112.5, 65.4, 30.7, 19.1, 13.6; HRMS (ESI-TOF) *m/z*: [M+Na]<sup>+</sup> C<sub>27</sub>H<sub>25</sub>NO<sub>2</sub>Na: 418.1783; found: 418.1780.

**Spectral data of propyl 3,4-diphenyl-3H-benzo[d]azepine-2-carboxylate (5e):**

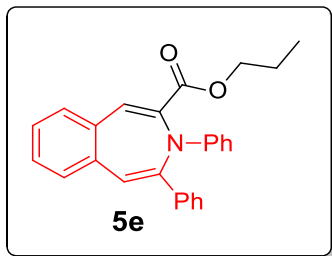

The compound **5e** was purified silica gel column using ethyl acetate/hexane: 3/97 as the eluent; Yellow solid (62 mg, 0.16 mmol, 76%); mp = 130-132°C; <sup>1</sup>H NMR (700 MHz, CDCl<sub>3</sub>): δ 8.07 (d, *J* = 8.4 Hz, 2H), 8.03 (s, 1H), 7.43 ~ 7.37 (m, 4H), 7.35 ~ 7.30 (m, 3H), 7.25 (t, *J* = 7.0 Hz, 1H), 7.01 (t, *J* = 8.4 Hz, 2H), 6.68 (t, *J* = 7.7 Hz, 1H), 6.58 (d, *J* = 8.4 Hz, 2H), 4.28 (s, 2H), 1.79 ~ 1.76 (m, 2H), 0.96 (t, *J* = 7.7 Hz, 3H); <sup>13</sup>C NMR (175 MHz, CDCl<sub>3</sub>): δ 164.9, 145.7, 145.6, 138.8, 137.0, 136.8, 134.6, 133.2, 131.1, 130.3, 128.8, 128.6, 128.4, 126.9, 126.6, 124.3, 118.4, 112.5, 67.1, 22.0, 10.4; HRMS (ESI-TOF) *m/z*: [M+Na]<sup>+</sup> C<sub>26</sub>H<sub>23</sub>NO<sub>2</sub>Na: 404.1626; found: 404.1633.

**Spectral data of *tert*-butyl 3,4-diphenyl-3H-benzo[d]azepine-2-carboxylate (5f):**

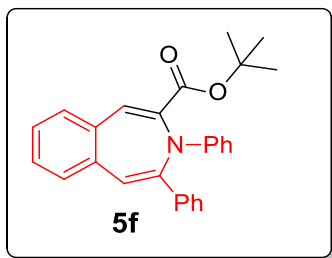

The compound **5f** was purified silica gel column using ethyl acetate/hexane:4/96 as the eluent; Yellow oil (51 mg, 0.12 mmol, 60%); <sup>1</sup>H NMR (500 MHz, CDCl<sub>3</sub>): δ 8.04 (d, *J* = 7.5 Hz, 2H), 7.89 (s, 1H), 7.38 ~ 7.26 (m, 7H), 7.22 ~ 7.20 (m, 1H), 6.98 (t, *J* = 9.0 Hz, 2H), 6.64 (t, *J* = 7.5 Hz, 1H), 6.53 (d, *J* = 8.0 Hz, 2H), 1.55 (s, 9H); <sup>13</sup>C NMR (175 MHz, CDCl<sub>3</sub>): δ 164.0, 145.7, 145.6, 137.6, 137.1, 136.7, 136.2, 133.5, 131.0, 130.2, 128.6, 128.5, 128.4, 128.3, 126.9, 126.7, 124.2, 118.2, 112.5, 82.0, 28.1; HRMS (ESI-TOF) *m/z*: [M+Na]<sup>+</sup> C<sub>27</sub>H<sub>25</sub>NO<sub>2</sub>Na: 418.1783; found: 418.1783.

**Spectral data of isopropyl 3,4-diphenyl-3H-benzo[d]azepine-2-carboxylate (5g):**

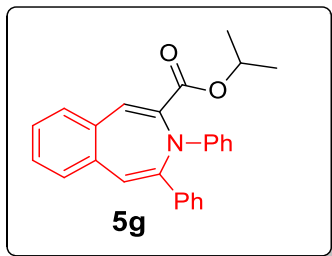

The compound **5g** was purified silica gel column using ethyl acetate/hexane:3/97 as the eluent; Yellow oil (58 mg, 0.15 mmol, 71%);  $^1\text{H}$  NMR (500 MHz,  $\text{CDCl}_3$ ):  $\delta$  8.07 (d,  $J = 8.0$  Hz, 2H), 8.00 (s, 1H), 7.43 ~ 7.30 (m, 7H), 7.26 ~ 7.25 (m, 1H), 7.00 (t,  $J = 8.0$  Hz, 2H), 6.67 (t,  $J = 7.5$  Hz, 1H), 6.55 (d,  $J = 8.5$  Hz, 2H), 5.25 ~ 5.20 (m, 1H), 1.35 (d,  $J = 6.0$  Hz, 6H);  $^{13}\text{C}$  NMR (175 MHz,  $\text{CDCl}_3$ ):  $\delta$  164.3, 145.7, 145.6, 138.5, 137.0, 136.8, 135.0, 133.3, 131.1, 130.3, 128.8, 128.6, 128.46, 128.43, 126.9, 126.7, 124.2, 118.3, 112.5, 69.1, 21.8; HRMS (ESI-TOF)  $m/z$ :  $[\text{M}+\text{Na}]^+$   $\text{C}_{26}\text{H}_{23}\text{NO}_2\text{Na}$ : 404.1626; found: 404.1626.

**Spectral data of cyclohexyl 3,4-diphenyl-3H-benzo[d]azepine-2-carboxylate (5h):**

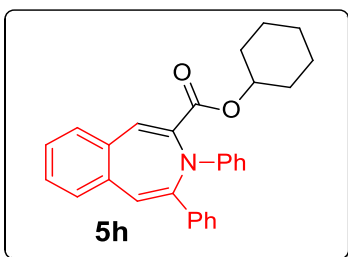

The compound **5h** was purified silica gel column using ethyl acetate/hexane:4/96 as the eluent; Yellow oil (64 mg, 0.15 mmol, 71%);  $^1\text{H}$  NMR (700 MHz,  $\text{CDCl}_3$ ):  $\delta$  8.08 (d,  $J = 7.0$  Hz, 2H), 8.01 (s, 1H), 7.43 ~ 7.30 (m, 7H), 7.26 ~ 7.24 (m, 1H), 7.00 (t,  $J = 7.7$  Hz, 2H), 6.67 (t,  $J = 7.7$  Hz, 1H), 6.57 (d,  $J = 8.4$  Hz, 2H), 5.02 ~ 4.98 (m, 1H), 1.97 (s, 2H), 1.75 (s, 2H), 1.58 ~ 1.56 (m, 3H), 1.44 ~ 1.39 (m, 2H), 1.31 ~ 1.26 (m, 1H);  $^{13}\text{C}$  NMR (175 MHz,  $\text{CDCl}_3$ ):  $\delta$  164.2, 145.7, 145.6, 138.5, 137.1, 136.8, 135.1, 133.3, 131.1, 130.3, 128.8, 128.6, 128.46, 128.42, 127.0, 126.7, 124.3, 118.3, 112.5, 74.1, 31.6, 25.3, 23.7; HRMS (ESI-TOF)  $m/z$ :  $[\text{M}+\text{H}]^+$   $\text{C}_{29}\text{H}_{28}\text{NO}_2$ : 422.2120; found: 422.2123.

**Spectral data of allyl 3,4-diphenyl-3H-benzo[d]azepine-2-carboxylate (5i):**

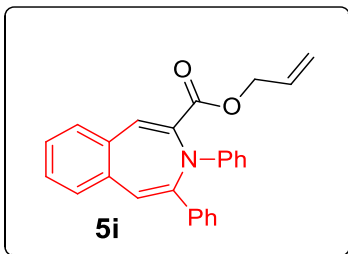

The compound **5i** was purified silica gel column using ethyl acetate/hexane:5/95 as the eluent; Yellow oil (55.0 g, 0.14 mmol, 68%);  $^1\text{H}$  NMR (700 MHz,  $\text{CDCl}_3$ ):  $\delta$  8.06 ~ 8.05 (m, 3H), 7.42 ~ 7.30 (m, 7H), 7.26 ~ 7.24 (m, 1H), 7.00 (t,  $J = 7.7$  Hz, 2H), 6.67 (t,  $J = 7.7$  Hz, 1H), 6.57 (d,  $J = 8.4$  Hz, 2H), 6.04 ~ 5.98 (m, 1H), 5.36 (dd,  $J = 1.4$  Hz, 17.5 Hz, 1H), 5.27 (dd,  $J = 0.7$  Hz, 10.5 Hz, 1H), 4.81 (d,  $J = 4.2$  Hz, 2H);  $^{13}\text{C}$  NMR (175 MHz,  $\text{CDCl}_3$ ):  $\delta$  164.3, 145.7, 145.6, 139.3, 136.96, 136.92, 134.2, 133.1, 131.9, 131.1, 130.3, 128.9, 128.7, 128.5, 127.0, 126.6, 124.2, 118.7, 118.4, 112.5, 66.1; HRMS (FD)  $m/z$ :  $[\text{M}]^+$   $\text{C}_{26}\text{H}_{21}\text{NO}_2$ : 379.1577; found: 379.1582.

**Spectral data of prop-2-yn-1-yl 3,4-diphenyl-3H-benzo[d]azepine-2-carboxylate (5j):**

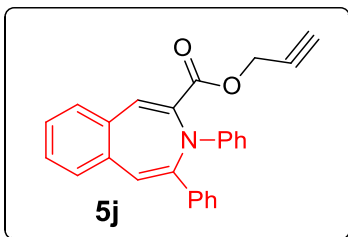

The compound **5j** was purified silica gel column using ethyl acetate/hexane:4/96 as the eluent; Yellow oil (52 mg, 0.13 mmol, 65%);  $^1\text{H}$  NMR (500 MHz,  $\text{CDCl}_3$ ):  $\delta$  8.06 ~ 8.05 (m, 3H), 7.42 ~ 7.36 (m, 4H), 7.34 ~ 7.30 (m, 3H), 7.27 ~ 7.23 (m, 1H), 7.00 (t,  $J = 8.5$  Hz, 2H), 6.67 (t,  $J = 7.5$  Hz, 1H), 6.56 (d,  $J = 8.0$  Hz, 2H), 4.88 (s, 2H), 2.53 (s, 1H);  $^{13}\text{C}$  NMR (175 MHz,  $\text{CDCl}_3$ ):  $\delta$  163.8, 145.8, 145.5, 140.1, 137.0, 136.8, 133.4, 133.0, 131.2, 130.3, 129.1, 128.7, 128.5, 127.0, 126.6, 124.2, 118.6, 112.5, 77.4, 75.2, 52.8; HRMS (FD)  $m/z$ :  $[\text{M}]^+$   $\text{C}_{26}\text{H}_{19}\text{NO}_2$ : 377.1421; found: 377.1420.

**Spectral data of (3,4-diphenyl-3H-benzo[d]azepin-2-yl)methanol (6a):**

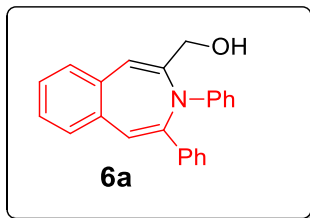

The compound **6a** was purified silica gel column using ethyl acetate/hexane:20/80 as the eluent; Pale yellow oil (49 mg, 0.15 mmol, 69 %);  $^1\text{H}$  NMR (500 MHz,  $\text{CDCl}_3$ ):  $\delta$  7.75 (d,  $J = 7.5$  Hz, 2H), 7.46 (s, 1H), 7.40 ~ 7.31 (m, 5H), 7.20 ~ 7.18 (m, 2H), 7.05 (s, 1H), 6.97 (t,  $J = 8.5$  Hz, 2H), 6.65 ~ 6.60 (m, 3H), 4.46 (s, 2H), 1.91 (s, 1H);  $^{13}\text{C}$  NMR (175 MHz,  $\text{CDCl}_3$ ):  $\delta$  146.4, 145.6, 143.2, 137.2, 135.1, 134.7, 130.2, 129.7, 128.9, 128.6, 128.3, 126.8, 126.7, 126.1, 125.8, 125.2, 118.1, 112.2, 63.5; HRMS (FD)  $m/z$ :  $[\text{M}]^+$   $\text{C}_{24}\text{H}_{19}\text{NO}_3$ : 325.1472; found: 325.1473.

**Spectral data of 3,4-diphenyl-3H-benzo[d]azepine-2-carbaldehyde (6b):**

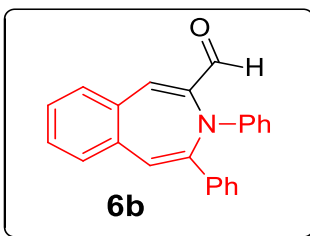

The compound **6b** was purified silica gel column using ethyl acetate/hexane:9/91 as the eluent; Pale Yellow oil (32 mg, 0.10 mmol, 73%);  $^1\text{H}$  NMR (700 MHz,  $\text{CDCl}_3$ ):  $\delta$  9.78 (s, 1H), 8.01 (d,  $J = 8.4$  Hz, 2H), 7.75 (s, 1H), 7.44 ~ 7.26 (m, 7H), 7.21 (s, 1H), 6.99 (t,  $J = 8.4$  Hz, 2H), 6.68 (t,  $J = 7.0$  Hz, 1H), 6.52 (d,  $J = 8.4$  Hz, 2H);  $^{13}\text{C}$  NMR (175 MHz,  $\text{CDCl}_3$ ):  $\delta$  188.8, 147.4, 146.1, 144.7, 144.2, 137.3, 137.0, 132.9, 131.2, 130.5, 129.9, 128.9, 128.8, 128.6, 127.2, 126.1, 124.0, 118.8, 112.8; HRMS (FD)  $m/z$ :  $[\text{M}]^+$   $\text{C}_{23}\text{H}_{17}\text{NO}$ : 323.1315; found: 323.1320.

**Spectral data of 2-(3,4-diphenyl-3H-benzo[d]azepin-2-yl)propan-2-ol (6c):**

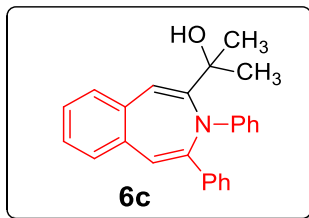

The compound **6c** was purified silica gel column using ethyl acetate/hexane:12/88 as the eluent; Yellow oil (36 mg, 0.10 mmol, 62 %);  $^1\text{H}$  NMR (700 MHz,  $\text{CDCl}_3$ ):  $\delta$  7.75 (d,  $J = 8.4$  Hz, 2H), 7.49 (s, 1H), 7.41 (t,  $J = 7.0$  Hz, 2H), 7.36 ~ 7.35 (m, 3H), 7.17 ~ 7.14 (m, 2H), 7.10 (s, 1H), 6.93 (t,  $J = 7.7$  Hz, 2H), 6.78 (d,  $J = 9.1$  Hz, 2H), 6.60 (t,  $J = 7.0$  Hz, 1H), 2.42 (s, 1H), 1.55 (s, 3H), 1.33 (s, 3H);  $^{13}\text{C}$  NMR (175 MHz,  $\text{CDCl}_3$ ):  $\delta$  152.4, 148.5, 145.1, 138.0, 134.7, 134.4, 130.2, 129.9, 128.9, 128.5, 128.1, 126.7, 126.6, 126.55, 126.50, 124.7, 118.7, 113.5, 73.6, 30.3, 29.1; HRMS (FD)  $m/z$ :  $[\text{M}]^+$   $\text{C}_{25}\text{H}_{23}\text{NO}$ : 353.1785; found: 353.1792.

**Spectral data of 1-(3,4-diphenyl-3H-benzo[d]azepin-2-yl)ethanone (6d):**

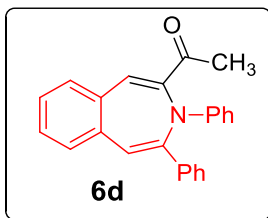

The compound **6d** was purified silica gel column using ethyl acetate/hexane:10/90 as the eluent; Yellow oil (35.8 mg, 0.10 mmol, 65 %);  $^1\text{H}$  NMR (700 MHz,  $\text{CDCl}_3$ ):  $\delta$  7.95 ~ 7.93 (m, 3H), 7.45 ~ 7.37 (m, 5H), 7.33 (q,  $J = 7.0$  Hz, 2H), 7.25 (t,  $J = 7.7$  Hz, 1H), 6.98 (t,  $J = 7.7$  Hz, 2H), 6.65 (t,  $J = 7.7$  Hz, 1H), 6.52 (d,  $J = 7.0$  Hz, 2H), 2.49 (s, 3H);  $^{13}\text{C}$  NMR (175 MHz,  $\text{CDCl}_3$ ):  $\delta$  196.4, 146.2, 145.0, 142.3, 138.4, 136.88, 136.80, 133.0, 131.4, 130.5, 129.1, 128.76, 128.70, 128.5, 127.1, 126.8, 125.2, 118.5, 112.4, 27.0; HRMS (ESI-TOF)  $m/z$ :  $[\text{M}+\text{Na}]^+$   $\text{C}_{24}\text{H}_{19}\text{NONa}$ : 360.1364; found: 360.1364.

**Spectral data of (2R,3R)-ethyl 1,3-diphenylaziridine-2-carboxylate (7a):**

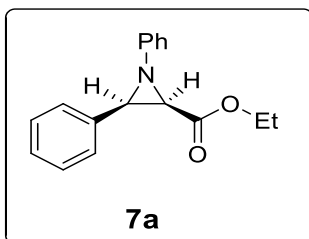

The compound **7a** was purified silica gel column using ethyl acetate/hexane:3/97 as the eluent; White solid (61.3 mg, 0.22 mmol, 52 %); mp = 63-65°C; <sup>1</sup>H NMR for *Cis* isomer (400 MHz, CDCl<sub>3</sub>): 7.50 (d, *J* = 8.4 Hz, 2H), 7.35 ~ 7.24 (m, 5H), 7.06 ~ 7.01 (m, 3H), 4.06 ~ 3.94 (m, 2H), 3.58 (d, *J* = 6.8 Hz, 1H), 3.19 (d, *J* = 6.8 Hz, 1H), 0.97 (t, *J* = 6.8 Hz, 3H); <sup>13</sup>C NMR (100 MHz, CDCl<sub>3</sub>): δ 167.6, 152.3, 134.6, 129.1, 128.0, 127.8, 127.6, 123.4, 119.9, 60.9, 47.1, 45.5, 13.8; HRMS (ESI-TOF) *m/z*: [M+Na]<sup>+</sup> C<sub>17</sub>H<sub>17</sub>NO<sub>2</sub>Na: 290.1157.; found: 290.1154.

**Spectral data of ethyl 1,3-diphenylaziridine-2-carboxylate (7a):**<sup>s4</sup>

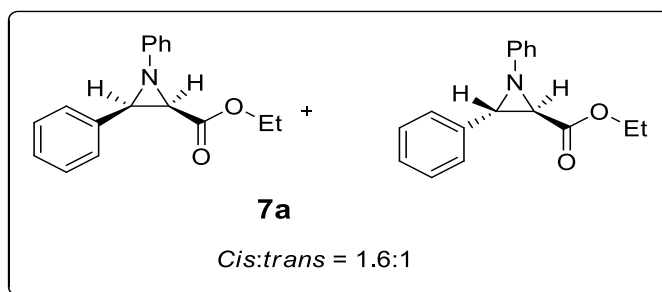

This obtained crude <sup>1</sup>H NMR data consistent with reported literature data **S5**. Crude <sup>1</sup>H NMR for *trans*- aziridine (400 MHz, CDCl<sub>3</sub>): 7.27 ~ 7.17 (m, 2H), 7.02 ~ 6.85 (m, 3H), 4.12 (q, *J* = 7.2 Hz, 2H), 3.81(d, *J* = 2.4 Hz, 1H), 3.23 (d, *J* = 2.4 Hz, 1H), 1.16 (t, *J* = 7.2 Hz, 3H); rest of peak merged with aromatic regions.

**Spectral data of (Z)-ethyl 3-phenyl-3-(phenylamino)acrylate (7b):**

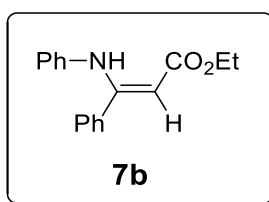

The compound **7b** was purified silica gel column using ethyl acetate/hexane:3/97 as the eluent; Pale yellow oil (14.0 mg, 0.05 mmol, 16%); <sup>1</sup>H NMR (700 MHz, CDCl<sub>3</sub>): δ 10.27 (s, 1H), 7.33 ~ 7.30 (m, 3H), 7.27 ~ 7.25 (m, 2H), 7.05 (t, *J* = 7.7 Hz, 2H), 6.88 (t, *J* = 7.0 Hz, 1H), 6.64 (d, *J* = 8.4 Hz, 2H), 4.97 (s, 1H), 4.19 (q, *J* = 7.0 Hz, 2H), 1.30 (t, *J* = 7.0 Hz, 3H); <sup>13</sup>C NMR (175 MHz, CDCl<sub>3</sub>): δ 170.1, 159.0, 140.3, 135.9, 129.4, 128.5, 128.4, 128.2, 122.9, 122.1, 91.1, 59.2, 14.5; HRMS (ESI-TOF) *m/z*: [M+H]<sup>+</sup> C<sub>17</sub>H<sub>18</sub>NO<sub>2</sub>: 268.1337.; found: 268.1338.



**Spectral data of (Z)-ethyl 2-phenyl-3-(phenylamino)acrylate (7b')**:

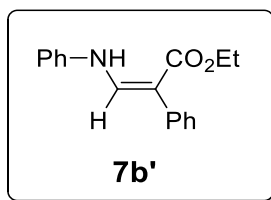

The compound **7b'** was purified silica gel column using ethyl acetate/hexane:3/97 as the eluent; Pale yellow oil (14.0 mg, 0.05 mmol, 20%); <sup>1</sup>H NMR (400 MHz, CDCl<sub>3</sub>): δ 10.33 (br d, 12.4Hz, 1H), 7.41 (t, *J* = 12.8 Hz, 1H), 7.53 ~ 7.24 (m, 7H), 7.01 ~ 6.99 (m, 3H), 4.26 (q, *J* = 6.8 Hz, 2H), 1.29 (t, *J* = 7.2 Hz, 3H); <sup>13</sup>C NMR (100 MHz, CDCl<sub>3</sub>): δ 169.2, 143.6, 140.7, 137.9, 129.6, 129.5, 127.9, 126.0, 122.6, 115.5, 102.9, 59.8, 14.3; HRMS (ESI-TOF) *m/z*: [M]<sup>+</sup> C<sub>17</sub>H<sub>17</sub>NO<sub>2</sub>: 267.1259; found: 267.1207

**Spectral data of (2S,3S)-ethyl 3-phenyl-1-(2-(phenylethynyl)phenyl)aziridine-2-carboxylate (7c):**

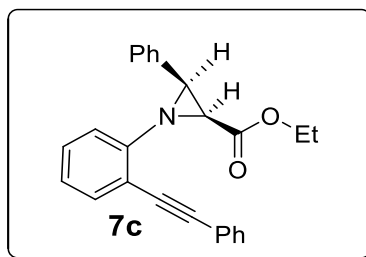

The compound **7c** was purified silica gel column using ethyl acetate/hexane:3/97 as the eluent; Brown oil (42.3 mg, 0.11 mmol, 54%); <sup>1</sup>H NMR (400 MHz, CDCl<sub>3</sub>): δ 7.55 (d, *J* = 7.6, 2H), 7.47 (d, *J* = 7.6, 2H), 7.32 ~ 7.15 (m, 7H), 7.08 ~ 7.06 (m, 2H), 7.04 ~ 7.00 (m, 2H), 3.89 ~ 3.84 (m, 2H), 3.77 (d, *J* = 6.8 Hz, 1H), 3.34 (d, *J* = 6.8 Hz, 1H), 0.86 (t, *J* = 7.2 Hz, 3H), <sup>13</sup>C NMR (100 MHz, CDCl<sub>3</sub>): δ 167.5, 153.2, 134.6, 133.2, 131.3, 129.1, 128.05, 128.0, 127.9, 127.8, 127.7, 123.1, 123.0, 119.9, 115.6, 95.6, 86.06, 60.9, 47.9, 46.7, 13.7; HRMS (EI-MS) *m/z*: [M+Na]<sup>+</sup> calcd. for C<sub>25</sub>H<sub>21</sub>NO<sub>2</sub>Na: 390.1470; found: 390.1466.

## (7) X-ray crystallographic data of compound:

### 7.1 X-ray crystallographic structure and data of compound (3a):

Experimental: The sample was dissolved in appropriate amount of ethyl acetate followed by the addition of pentane to furnish a saturated solution. Afterwards, the mixture was allowed to stand at room temperature to form the crystals.

Crystal measurements:

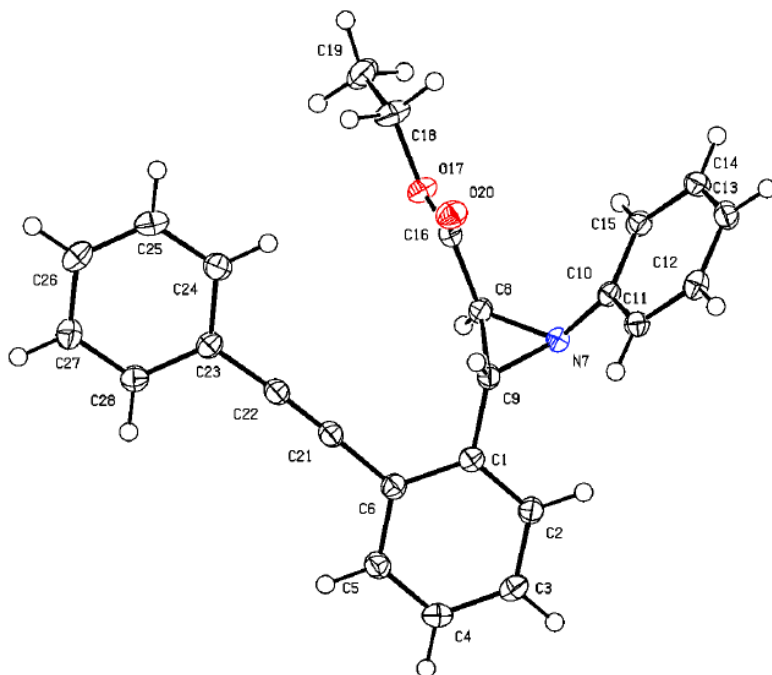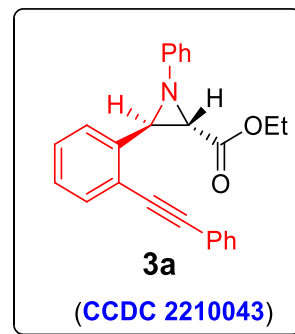

### 220613lt\_auto

**Table S2: Crystal data and structure refinement for 220613lt\_auto.**

|                       |                                                 |
|-----------------------|-------------------------------------------------|
| Identification code   | 220613lt_auto                                   |
| Empirical formula     | C <sub>25</sub> H <sub>21</sub> NO <sub>2</sub> |
| Formula weight        | 367.43                                          |
| Temperature/K         | 100.00(10)                                      |
| Crystal system        | triclinic                                       |
| Space group           | P-1                                             |
| a/Å                   | 9.03855(12)                                     |
| b/Å                   | 10.22281(12)                                    |
| c/Å                   | 10.74746(12)                                    |
| α/°                   | 90.6728(9)                                      |
| β/°                   | 100.9741(10)                                    |
| γ/°                   | 93.6105(10)                                     |
| Volume/Å <sup>3</sup> | 972.68(2)                                       |

|                                                |                                                               |
|------------------------------------------------|---------------------------------------------------------------|
| Z                                              | 2                                                             |
| $\rho_{\text{calc}}/\text{cm}^3$               | 1.255                                                         |
| $\mu/\text{mm}^{-1}$                           | 0.626                                                         |
| F(000)                                         | 388.0                                                         |
| Crystal size/ $\text{mm}^3$                    | $0.21 \times 0.2 \times 0.16$                                 |
| Radiation                                      | Cu K $\alpha$ ( $\lambda = 1.54184$ )                         |
| $2\Theta$ range for data collection/ $^\circ$  | 8.67 to 149.736                                               |
| Index ranges                                   | $-10 \leq h \leq 11, -12 \leq k \leq 10, -12 \leq l \leq 13$  |
| Reflections collected                          | 10355                                                         |
| Independent reflections                        | 3748 [ $R_{\text{int}} = 0.0129, R_{\text{sigma}} = 0.0142$ ] |
| Data/restraints/parameters                     | 3748/0/255                                                    |
| Goodness-of-fit on $F^2$                       | 1.030                                                         |
| Final R indexes [ $I \geq 2\sigma(I)$ ]        | $R_1 = 0.0328, wR_2 = 0.0831$                                 |
| Final R indexes [all data]                     | $R_1 = 0.0342, wR_2 = 0.0841$                                 |
| Largest diff. peak/hole / $e \text{ \AA}^{-3}$ | 0.22/-0.16                                                    |

**Table S3: Fractional Atomic Coordinates ( $\times 10^4$ ) and Equivalent Isotropic Displacement Parameters ( $\text{\AA}^2 \times 10^3$ ) for 220613lt\_auto.  $U_{\text{eq}}$  is defined as 1/3 of the trace of the orthogonalised  $U_{\text{ij}}$  tensor.**

| Atom | x           | y          | z          | $U(\text{eq})$ |
|------|-------------|------------|------------|----------------|
| C1   | 4145.2(11)  | 6553.1(9)  | 2727.1(9)  | 18.4(2)        |
| C2   | 2714.0(11)  | 5976.1(10) | 2732.6(10) | 20.9(2)        |
| C3   | 1850.0(12)  | 5397.1(10) | 1635.0(10) | 23.3(2)        |
| C4   | 2399.2(12)  | 5404.5(10) | 514.4(10)  | 23.0(2)        |
| C5   | 3820.8(12)  | 5979.6(10) | 490.0(10)  | 21.6(2)        |
| C6   | 4717.8(11)  | 6546.6(10) | 1595.8(10) | 19.2(2)        |
| C8   | 6264.4(11)  | 6489.6(10) | 4742.2(9)  | 19.1(2)        |
| C9   | 5082.3(11)  | 7207.0(10) | 3883.7(9)  | 18.3(2)        |
| C10  | 4734.5(11)  | 7682.0(9)  | 6093.7(9)  | 17.9(2)        |
| C11  | 3796.5(11)  | 8716.7(10) | 5854.3(10) | 19.9(2)        |
| C12  | 3535.7(12)  | 9484.8(10) | 6855.3(10) | 22.2(2)        |
| C13  | 4229.7(12)  | 9248.8(10) | 8091.5(10) | 23.4(2)        |
| C14  | 5195.7(12)  | 8236.4(11) | 8322.1(10) | 23.1(2)        |
| C15  | 5442.2(11)  | 7445.9(10) | 7332.1(10) | 20.7(2)        |
| C16  | 7673.7(11)  | 7283.8(10) | 5327.0(9)  | 19.8(2)        |
| C18  | 10227.7(12) | 7155.5(12) | 6318.8(12) | 32.0(3)        |
| C19  | 11331.5(12) | 6125.3(13) | 6659.1(12) | 32.8(3)        |
| C21  | 6216.3(11)  | 7096.2(10) | 1576.0(9)  | 20.3(2)        |
| C22  | 7469.2(12)  | 7538.6(10) | 1524.1(9)  | 21.0(2)        |

**Table S3: Fractional Atomic Coordinates ( $\times 10^4$ ) and Equivalent Isotropic Displacement Parameters ( $\text{\AA}^2 \times 10^3$ ) for 220613lt\_auto.  $U_{\text{eq}}$  is defined as 1/3 of the trace of the orthogonalised  $U_{\text{IJ}}$  tensor.**

| Atom | $x$         | $y$        | $z$        | $U(\text{eq})$ |
|------|-------------|------------|------------|----------------|
| C23  | 8941.6(11)  | 8065.5(10) | 1388.0(10) | 20.3(2)        |
| C24  | 9924.4(12)  | 8728.7(10) | 2395.6(10) | 24.1(2)        |
| C25  | 11336.2(12) | 9233.2(11) | 2235.3(11) | 26.2(2)        |
| C26  | 11788.7(12) | 9067.8(11) | 1084.7(11) | 26.3(2)        |
| C27  | 10821.4(12) | 8420.0(11) | 80.9(11)   | 25.2(2)        |
| C28  | 9400.8(12)  | 7925.0(10) | 223.4(10)  | 22.2(2)        |
| N7   | 4818.3(9)   | 6773.2(8)  | 5105.6(8)  | 17.97(19)      |
| O17  | 8795.3(8)   | 6497.9(7)  | 5709.9(7)  | 23.66(18)      |
| O20  | 7795.2(8)   | 8462.4(7)  | 5442.8(7)  | 25.87(19)      |

**Table S4: Anisotropic Displacement Parameters ( $\text{\AA}^2 \times 10^3$ ) for 220613lt\_auto. The Anisotropic displacement factor exponent takes the form:  $-2\pi^2[\text{h}^2\text{a}^{*2}U_{11}+2\text{hka}^*\text{b}^*U_{12}+\dots]$ .**

| Atom | $U_{11}$ | $U_{22}$ | $U_{33}$ | $U_{23}$ | $U_{13}$ | $U_{12}$ |
|------|----------|----------|----------|----------|----------|----------|
| C1   | 18.4(5)  | 17.2(5)  | 19.4(5)  | 1.4(4)   | 3.1(4)   | 2.6(4)   |
| C2   | 19.7(5)  | 22.8(5)  | 20.9(5)  | 2.1(4)   | 5.2(4)   | 2.0(4)   |
| C3   | 17.4(5)  | 24.1(5)  | 27.2(5)  | 1.9(4)   | 2.0(4)   | -1.2(4)  |
| C4   | 21.6(5)  | 23.2(5)  | 21.8(5)  | -1.5(4)  | -1.7(4)  | 1.1(4)   |
| C5   | 22.6(5)  | 23.2(5)  | 19.3(5)  | -0.3(4)  | 4.2(4)   | 3.8(4)   |
| C6   | 18.6(5)  | 19.3(5)  | 19.9(5)  | 0.6(4)   | 3.9(4)   | 3.1(4)   |
| C8   | 17.1(5)  | 20.0(5)  | 20.3(5)  | -1.4(4)  | 4.6(4)   | 0.2(4)   |
| C9   | 18.2(5)  | 19.3(5)  | 18.0(5)  | 0.5(4)   | 5.6(4)   | 0.4(4)   |
| C10  | 16.1(5)  | 18.8(5)  | 18.9(5)  | 0.4(4)   | 5.0(4)   | -3.2(4)  |
| C11  | 18.8(5)  | 21.7(5)  | 18.9(5)  | 2.8(4)   | 3.5(4)   | -0.6(4)  |
| C12  | 20.3(5)  | 20.3(5)  | 27.0(5)  | 0.8(4)   | 7.7(4)   | 0.3(4)   |
| C13  | 25.1(5)  | 24.3(5)  | 21.7(5)  | -4.1(4)  | 8.7(4)   | -4.2(4)  |
| C14  | 22.5(5)  | 28.3(5)  | 17.3(5)  | 1.4(4)   | 2.4(4)   | -4.1(4)  |
| C15  | 18.5(5)  | 22.2(5)  | 21.3(5)  | 2.9(4)   | 3.4(4)   | 0.2(4)   |
| C16  | 19.7(5)  | 23.2(5)  | 17.0(5)  | -0.8(4)  | 5.1(4)   | 0.3(4)   |
| C18  | 19.0(5)  | 34.9(6)  | 37.8(7)  | -3.9(5)  | -3.8(5)  | -3.7(5)  |
| C19  | 17.8(5)  | 43.6(7)  | 36.4(6)  | 9.5(5)   | 4.2(5)   | 0.3(5)   |
| C21  | 21.6(5)  | 22.7(5)  | 16.9(5)  | -0.7(4)  | 4.1(4)   | 2.4(4)   |
| C22  | 22.3(5)  | 23.4(5)  | 17.4(5)  | -0.5(4)  | 4.0(4)   | 2.8(4)   |
| C23  | 18.5(5)  | 19.7(5)  | 22.8(5)  | 1.5(4)   | 3.5(4)   | 2.1(4)   |
| C24  | 24.2(5)  | 26.2(5)  | 21.6(5)  | -1.0(4)  | 2.7(4)   | 3.6(4)   |
| C25  | 22.3(5)  | 23.7(5)  | 29.3(6)  | -2.1(4)  | -2.9(4)  | -0.4(4)  |
| C26  | 19.1(5)  | 23.0(5)  | 36.2(6)  | 3.3(4)   | 4.8(4)   | -1.2(4)  |

**Table S4: Anisotropic Displacement Parameters ( $\text{\AA}^2 \times 10^3$ ) for 220613lt\_auto. The Anisotropic displacement factor exponent takes the form:  $-2\pi^2[h^2a^{*2}U_{11}+2hka^*b^*U_{12}+\dots]$ .**

| Atom | U <sub>11</sub> | U <sub>22</sub> | U <sub>33</sub> | U <sub>23</sub> | U <sub>13</sub> | U <sub>12</sub> |
|------|-----------------|-----------------|-----------------|-----------------|-----------------|-----------------|
| C27  | 24.5(5)         | 25.9(5)         | 26.8(6)         | 1.6(4)          | 9.2(4)          | 0.0(4)          |
| C28  | 21.7(5)         | 21.6(5)         | 22.5(5)         | -1.7(4)         | 3.0(4)          | -1.1(4)         |
| N7   | 16.2(4)         | 20.4(4)         | 17.4(4)         | 0.5(3)          | 3.6(3)          | 0.8(3)          |
| O17  | 16.1(4)         | 25.2(4)         | 28.0(4)         | -0.9(3)         | 0.9(3)          | -0.4(3)         |
| O20  | 23.8(4)         | 22.2(4)         | 29.9(4)         | -3.3(3)         | 2.5(3)          | -2.2(3)         |

**Table S5: Bond Lengths for 220613lt\_auto.**

| Atom | Atom | Length/ $\text{\AA}$ | Atom | Atom | Length/ $\text{\AA}$ |
|------|------|----------------------|------|------|----------------------|
| C1   | C2   | 1.3886(14)           | C12  | C13  | 1.3878(15)           |
| C1   | C6   | 1.4093(14)           | C13  | C14  | 1.3902(15)           |
| C1   | C9   | 1.4893(14)           | C14  | C15  | 1.3883(15)           |
| C2   | C3   | 1.3879(15)           | C16  | O17  | 1.3394(12)           |
| C3   | C4   | 1.3872(15)           | C16  | O20  | 1.2058(13)           |
| C4   | C5   | 1.3840(15)           | C18  | C19  | 1.4969(17)           |
| C5   | C6   | 1.4013(14)           | C18  | O17  | 1.4539(13)           |
| C6   | C21  | 1.4374(14)           | C21  | C22  | 1.2043(15)           |
| C8   | C9   | 1.5067(14)           | C22  | C23  | 1.4382(14)           |
| C8   | C16  | 1.4932(14)           | C23  | C24  | 1.4008(15)           |
| C8   | N7   | 1.4780(12)           | C23  | C28  | 1.4002(15)           |
| C9   | N7   | 1.4483(12)           | C24  | C25  | 1.3881(15)           |
| C10  | C11  | 1.3928(14)           | C25  | C26  | 1.3862(16)           |
| C10  | C15  | 1.3935(14)           | C26  | C27  | 1.3849(16)           |
| C10  | N7   | 1.4187(13)           | C27  | C28  | 1.3868(15)           |
| C11  | C12  | 1.3891(14)           |      |      |                      |

**Table S6: Bond Angles for 220613lt\_auto.**

| Atom | Atom | Atom | Angle/ $^\circ$ | Atom | Atom | Atom | Angle/ $^\circ$ |
|------|------|------|-----------------|------|------|------|-----------------|
| C2   | C1   | C6   | 119.46(9)       | C12  | C13  | C14  | 119.40(10)      |
| C2   | C1   | C9   | 121.58(9)       | C15  | C14  | C13  | 120.58(10)      |
| C6   | C1   | C9   | 118.95(9)       | C14  | C15  | C10  | 119.75(10)      |
| C3   | C2   | C1   | 120.47(10)      | O17  | C16  | C8   | 110.22(8)       |
| C4   | C3   | C2   | 120.31(10)      | O20  | C16  | C8   | 125.31(9)       |
| C5   | C4   | C3   | 120.01(10)      | O20  | C16  | O17  | 124.47(9)       |
| C4   | C5   | C6   | 120.34(10)      | O17  | C18  | C19  | 107.59(9)       |
| C1   | C6   | C21  | 120.53(9)       | C22  | C21  | C6   | 178.02(11)      |

**Table S6: Bond Angles for 220613lt\_auto.**

| Atom | Atom | Atom | Angle/°    | Atom | Atom | Atom | Angle/°    |
|------|------|------|------------|------|------|------|------------|
| C5   | C6   | C1   | 119.39(9)  | C21  | C22  | C23  | 176.87(11) |
| C5   | C6   | C21  | 120.08(9)  | C24  | C23  | C22  | 121.30(9)  |
| C16  | C8   | C9   | 116.24(8)  | C28  | C23  | C22  | 119.53(9)  |
| N7   | C8   | C9   | 58.05(6)   | C28  | C23  | C24  | 119.17(10) |
| N7   | C8   | C16  | 119.44(8)  | C25  | C24  | C23  | 120.07(10) |
| C1   | C9   | C8   | 121.06(8)  | C26  | C25  | C24  | 120.24(10) |
| N7   | C9   | C1   | 117.88(8)  | C27  | C26  | C25  | 120.10(10) |
| N7   | C9   | C8   | 59.98(6)   | C26  | C27  | C28  | 120.25(10) |
| C11  | C10  | C15  | 119.87(9)  | C27  | C28  | C23  | 120.16(10) |
| C11  | C10  | N7   | 119.92(9)  | C9   | N7   | C8   | 61.97(6)   |
| C15  | C10  | N7   | 119.73(9)  | C10  | N7   | C8   | 122.38(8)  |
| C12  | C11  | C10  | 119.83(9)  | C10  | N7   | C9   | 121.41(8)  |
| C13  | C12  | C11  | 120.53(10) | C16  | O17  | C18  | 115.54(8)  |

**Table S7: Torsion Angles for 220613lt\_auto.**

| A  | B   | C   | D   | Angle/°     | A   | B   | C   | D   | Angle/°     |
|----|-----|-----|-----|-------------|-----|-----|-----|-----|-------------|
| C1 | C2  | C3  | C4  | -0.90(16)   | C11 | C12 | C13 | C14 | 0.20(15)    |
| C1 | C9  | N7  | C8  | 111.62(10)  | C12 | C13 | C14 | C15 | -1.46(15)   |
| C1 | C9  | N7  | C10 | -135.69(9)  | C13 | C14 | C15 | C10 | 1.04(15)    |
| C2 | C1  | C6  | C5  | 1.20(14)    | C15 | C10 | C11 | C12 | -1.89(14)   |
| C2 | C1  | C6  | C21 | -177.80(9)  | C15 | C10 | N7  | C8  | -63.05(12)  |
| C2 | C1  | C9  | C8  | 96.26(12)   | C15 | C10 | N7  | C9  | -137.69(10) |
| C2 | C1  | C9  | N7  | 26.27(14)   | C16 | C8  | C9  | C1  | 143.82(9)   |
| C2 | C3  | C4  | C5  | 0.64(16)    | C16 | C8  | C9  | N7  | -109.78(9)  |
| C3 | C4  | C5  | C6  | 0.55(15)    | C16 | C8  | N7  | C9  | 104.27(10)  |
| C4 | C5  | C6  | C1  | -1.47(15)   | C16 | C8  | N7  | C10 | -6.92(14)   |
| C4 | C5  | C6  | C21 | 177.54(9)   | C19 | C18 | O17 | C16 | -179.26(9)  |
| C6 | C1  | C2  | C3  | -0.03(15)   | C22 | C23 | C24 | C25 | -179.66(10) |
| C6 | C1  | C9  | C8  | -85.08(12)  | C22 | C23 | C28 | C27 | -179.55(9)  |
| C6 | C1  | C9  | N7  | -155.07(9)  | C23 | C24 | C25 | C26 | -0.90(16)   |
| C8 | C9  | N7  | C10 | 112.69(10)  | C24 | C23 | C28 | C27 | 1.02(15)    |
| C8 | C16 | O17 | C18 | -178.95(9)  | C24 | C25 | C26 | C27 | 1.27(16)    |
| C9 | C1  | C2  | C3  | 178.63(9)   | C25 | C26 | C27 | C28 | -0.48(16)   |
| C9 | C1  | C6  | C5  | -177.49(9)  | C26 | C27 | C28 | C23 | -0.66(16)   |
| C9 | C1  | C6  | C21 | 3.51(14)    | C28 | C23 | C24 | C25 | -0.23(15)   |
| C9 | C8  | C16 | O17 | -159.90(8)  | N7  | C8  | C9  | C1  | -106.40(10) |
| C9 | C8  | C16 | O20 | 20.15(15)   | N7  | C8  | C16 | O17 | 133.63(9)   |
| C9 | C8  | N7  | C10 | -111.19(10) | N7  | C8  | C16 | O20 | -46.32(14)  |

**Table S7: Torsion Angles for 220613lt\_auto.**

| A   | B   | C   | D   | Angle/°    | A   | B   | C   | D   | Angle/°    |
|-----|-----|-----|-----|------------|-----|-----|-----|-----|------------|
| C10 | C11 | C12 | C13 | 1.47(15)   | N7  | C10 | C11 | C12 | 170.16(9)  |
| C11 | C10 | C15 | C14 | 0.64(15)   | N7  | C10 | C15 | C14 | -171.42(9) |
| C11 | C10 | N7  | C8  | 124.89(10) | O20 | C16 | O17 | C18 | 1.00(15)   |
| C11 | C10 | N7  | C9  | 50.25(13)  |     |     |     |     |            |

**Table S8: Hydrogen Atom Coordinates ( $\text{\AA} \times 10^4$ ) and Isotropic Displacement Parameters ( $\text{\AA}^2 \times 10^3$ ) for 220613lt\_auto.**

| Atom | x        | y        | z       | U(eq) |
|------|----------|----------|---------|-------|
| H2   | 2323.37  | 5977.75  | 3493    | 25    |
| H3   | 878.01   | 4993.88  | 1651.25 | 28    |
| H4   | 1799.4   | 5014.66  | -236.38 | 28    |
| H5   | 4190.47  | 5989.97  | -280.52 | 26    |
| H8   | 6380.83  | 5560.63  | 4496.53 | 23    |
| H9   | 5315.8   | 8170.71  | 3822.87 | 22    |
| H11  | 3336.35  | 8896.63  | 5008.61 | 24    |
| H12  | 2877.05  | 10177.27 | 6692.37 | 27    |
| H13  | 4046.15  | 9774.45  | 8773.96 | 28    |
| H14  | 5691.6   | 8084.07  | 9164.52 | 28    |
| H15  | 6090.89  | 6746.72  | 7498.34 | 25    |
| H18A | 10105.07 | 7642.2   | 7090.56 | 38    |
| H18B | 10593.1  | 7785.69  | 5734.53 | 38    |
| H19A | 11506.75 | 5698.87  | 5883.55 | 49    |
| H19B | 10923.06 | 5470.59  | 7184.6  | 49    |
| H19C | 12287.47 | 6532.14  | 7132.08 | 49    |
| H24  | 9624.45  | 8833.33  | 3189.51 | 29    |
| H25  | 11994.6  | 9693.55  | 2916.63 | 31    |
| H26  | 12763.74 | 9399.37  | 984.53  | 32    |
| H27  | 11132.28 | 8314.28  | -708.32 | 30    |
| H28  | 8737.55  | 7489.52  | -470.8  | 27    |

## Experimental

Single crystals of  $\text{C}_{25}\text{H}_{21}\text{NO}_2$  [220613lt\_auto] were [1]. A suitable crystal was selected and [2] on a **XtaLAB Synergy R, DW system, HyPix-Arc 150** diffractometer. The crystal was kept at 100.00(10) K during data collection. Using Olex2 [1], the structure was solved with the SHELXT [2] structure solution program using Intrinsic Phasing and refined with the SHELXL [3] refinement package using Least Squares minimisation.

1. Dolomanov, O.V., Bourhis, L.J., Gildea, R.J., Howard, J.A.K. & Puschmann, H. (2009), *J. Appl. Cryst.* 42, 339-341.

2. Sheldrick, G.M. (2015). Acta Cryst. A71, 3-8.
3. Sheldrick, G.M. (2015). Acta Cryst. C71, 3-8.

### Crystal structure determination of [220613lt\_auto]

**Crystal Data** for  $C_{25}H_{21}NO_2$  ( $M = 367.43$  g/mol): triclinic, space group P-1 (no. 2),  $a = 9.03855(12)$  Å,  $b = 10.22281(12)$  Å,  $c = 10.74746(12)$  Å,  $\alpha = 90.6728(9)^\circ$ ,  $\beta = 100.9741(10)^\circ$ ,  $\gamma = 93.6105(10)^\circ$ ,  $V = 972.68(2)$  Å<sup>3</sup>,  $Z = 2$ ,  $T = 100.00(10)$  K,  $\mu(\text{Cu K}\alpha) = 0.626$  mm<sup>-1</sup>,  $D_{\text{calc}} = 1.255$  g/cm<sup>3</sup>, 10355 reflections measured ( $8.67^\circ \leq 2\theta \leq 149.736^\circ$ ), 3748 unique ( $R_{\text{int}} = 0.0129$ ,  $R_{\text{sigma}} = 0.0142$ ) which were used in all calculations. The final  $R_1$  was 0.0328 ( $I > 2\sigma(I)$ ) and  $wR_2$  was 0.0841 (all data).

### Refinement model description

Number of restraints - 0, number of constraints - unknown.

Details:

1. Fixed Uiso

At 1.2 times of:

All C(H) groups, All C(H,H) groups

At 1.5 times of:

All C(H,H,H) groups

2.a Ternary CH refined with riding coordinates:

C8(H8), C9(H9)

2.b Secondary CH2 refined with riding coordinates:

C18(H18A,H18B)

2.c Aromatic/amide H refined with riding coordinates:

C2(H2), C3(H3), C4(H4), C5(H5), C11(H11), C12(H12), C13(H13), C14(H14),  
C15(H15), C24(H24), C25(H25), C26(H26), C27(H27), C28(H28)

2.d Idealised Me refined as rotating group:

C19(H19A,H19B,H19C)



## 7.2 X-ray crystallographic structure and data of compound (4a):

Experimental: The sample was dissolved in appropriate amount of ethyl acetate followed by the addition of pentane to furnish a saturated solution. Afterwards, the mixture was allowed to stand at room temperature to form the crystals.

### Crystal Measurement:

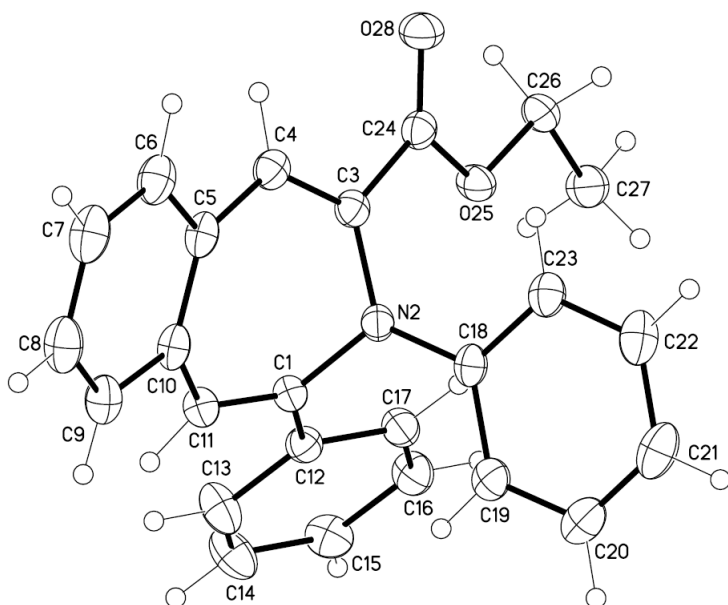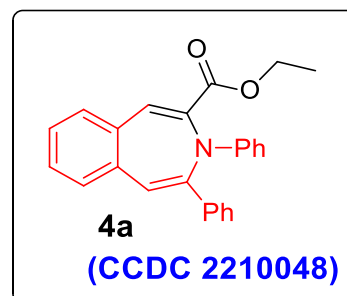

### 211143LT\_auto

**Table S9: Crystal data and structure refinement for 211143LT\_auto.**

|                     |                                                 |
|---------------------|-------------------------------------------------|
| Identification code | 211143LT_auto                                   |
| Empirical formula   | C <sub>25</sub> H <sub>21</sub> NO <sub>2</sub> |
| Formula weight      | 367.43                                          |
| Temperature/K       | 100.00(10)                                      |
| Crystal system      | triclinic                                       |
| Space group         | P-1                                             |
| a/Å                 | 9.6318(3)                                       |
| b/Å                 | 10.8319(4)                                      |
| c/Å                 | 11.3759(4)                                      |
| α/°                 | 92.501(3)                                       |
| β/°                 | 114.674(3)                                      |
| γ/°                 | 115.008(3)                                      |

|                                             |                                                               |
|---------------------------------------------|---------------------------------------------------------------|
| Volume/Å <sup>3</sup>                       | 941.83(7)                                                     |
| Z                                           | 2                                                             |
| ρ <sub>calc</sub> /g/cm <sup>3</sup>        | 1.296                                                         |
| μ/mm <sup>-1</sup>                          | 0.646                                                         |
| F(000)                                      | 388.0                                                         |
| Crystal size/mm <sup>3</sup>                | 0.17 × 0.14 × 0.12                                            |
| Radiation                                   | Cu Kα (λ = 1.54184)                                           |
| 2Θ range for data collection/°              | 8.878 to 145.99                                               |
| Index ranges                                | -11 ≤ h ≤ 11, -11 ≤ k ≤ 13, -13 ≤ l ≤ 12                      |
| Reflections collected                       | 10151                                                         |
| Independent reflections                     | 3521 [R <sub>int</sub> = 0.0217, R <sub>sigma</sub> = 0.0248] |
| Data/restraints/parameters                  | 3521/0/255                                                    |
| Goodness-of-fit on F <sup>2</sup>           | 1.055                                                         |
| Final R indexes [I ≥ 2σ (I)]                | R <sub>1</sub> = 0.0363, wR <sub>2</sub> = 0.0950             |
| Final R indexes [all data]                  | R <sub>1</sub> = 0.0403, wR <sub>2</sub> = 0.0975             |
| Largest diff. peak/hole / e Å <sup>-3</sup> | 0.55/-0.17                                                    |

**Table S10: Fractional Atomic Coordinates (×10<sup>4</sup>) and Equivalent Isotropic Displacement Parameters (Å<sup>2</sup>×10<sup>3</sup>) for 211143LT\_auto. U<sub>eq</sub> is defined as 1/3 of the trace of the orthogonalised U<sub>ij</sub> tensor.**

| Atom | x           | y          | z          | U(eq)   |
|------|-------------|------------|------------|---------|
| C1   | 5097.0(15)  | 6021.4(12) | 2651.1(12) | 20.2(3) |
| C3   | 4658.9(15)  | 6613.3(12) | 4500.3(12) | 20.2(3) |
| C4   | 6210.0(16)  | 7032.7(12) | 5579.2(12) | 22.3(3) |
| C5   | 7914.2(16)  | 7715.5(12) | 5627.9(12) | 23.2(3) |
| C6   | 9375.2(17)  | 8582.8(13) | 6876.1(13) | 28.6(3) |
| C7   | 11041.5(17) | 9279.4(14) | 7025.4(14) | 32.4(3) |
| C8   | 11304.0(17) | 9090.9(14) | 5933.9(15) | 31.6(3) |
| C9   | 9897.1(16)  | 8198.3(13) | 4706.8(14) | 27.4(3) |
| C10  | 8180.4(16)  | 7503.1(12) | 4517.3(12) | 23.2(3) |
| C11  | 6810.2(16)  | 6451.3(13) | 3235.4(12) | 22.6(3) |
| C12  | 3742.2(16)  | 4791.6(12) | 1460.7(12) | 21.2(3) |
| C13  | 4186.5(17)  | 3944.4(14) | 887.8(14)  | 31.7(3) |
| C14  | 2913.7(18)  | 2783.9(15) | -206.5(15) | 34.5(3) |
| C15  | 1169.2(17)  | 2429.7(14) | -753.3(13) | 28.9(3) |
| C16  | 710.1(16)   | 3256.4(14) | -198.0(13) | 27.2(3) |
| C17  | 1982.4(16)  | 4426.1(13) | 899.2(12)  | 23.5(3) |
| C18  | 4178.6(14)  | 7821.4(12) | 2725.4(12) | 20.3(3) |
| C19  | 4169.7(15)  | 8054.1(13) | 1521.0(12) | 23.8(3) |

**Table S10: Fractional Atomic Coordinates ( $\times 10^4$ ) and Equivalent Isotropic Displacement Parameters ( $\text{\AA}^2 \times 10^3$ ) for 211143LT\_auto.  $U_{eq}$  is defined as 1/3 of the trace of the orthogonalised  $U_{IJ}$  tensor.**

| Atom | x           | y          | z          | U(eq)   |
|------|-------------|------------|------------|---------|
| C20  | 3874.4(16)  | 9127.0(14) | 1044.3(14) | 29.9(3) |
| C21  | 3579.4(18)  | 9988.9(14) | 1742.2(14) | 34.0(3) |
| C22  | 3564.3(17)  | 9748.2(14) | 2924.2(14) | 30.6(3) |
| C23  | 3853.9(16)  | 8682.4(13) | 3417.5(12) | 24.3(3) |
| C24  | 3032.4(16)  | 5976.2(12) | 4633.6(12) | 21.6(3) |
| C26  | -55.7(16)   | 4607.3(13) | 3453.1(12) | 24.4(3) |
| C27  | -1464.8(16) | 3801.8(14) | 2034.1(13) | 29.0(3) |
| N2   | 4495.4(13)  | 6762.3(10) | 3224.9(9)  | 19.4(2) |
| O25  | 1598.9(11)  | 5311.5(9)  | 3432.9(8)  | 23.1(2) |
| O28  | 3025.8(12)  | 6060.0(10) | 5695.3(9)  | 28.3(2) |

**Table S11: Anisotropic Displacement Parameters ( $\text{\AA}^2 \times 10^3$ ) for 211143LT\_auto. The Anisotropic displacement factor exponent takes the form:  $-2\pi^2[h^2a^{*2}U_{11}+2hka^*b^*U_{12}+\dots]$ .**

| Atom | U <sub>11</sub> | U <sub>22</sub> | U <sub>33</sub> | U <sub>23</sub> | U <sub>13</sub> | U <sub>12</sub> |
|------|-----------------|-----------------|-----------------|-----------------|-----------------|-----------------|
| C1   | 20.7(6)         | 21.5(6)         | 21.4(6)         | 6.4(5)          | 10.9(5)         | 11.8(5)         |
| C3   | 21.8(6)         | 18.6(6)         | 20.1(6)         | 3.8(5)          | 9.2(5)          | 10.8(5)         |
| C4   | 24.8(6)         | 19.2(6)         | 21.2(6)         | 4.2(5)          | 8.9(5)          | 11.7(5)         |
| C5   | 20.8(6)         | 18.7(6)         | 25.2(6)         | 4.6(5)          | 5.6(5)          | 10.9(5)         |
| C6   | 26.5(7)         | 23.8(6)         | 27.2(7)         | 2.7(5)          | 5.2(6)          | 13.5(5)         |
| C7   | 21.8(6)         | 22.0(6)         | 34.0(7)         | 0.0(5)          | 0.5(6)          | 8.4(5)          |
| C8   | 18.7(6)         | 23.3(6)         | 42.8(8)         | 7.3(6)          | 8.6(6)          | 8.2(5)          |
| C9   | 21.3(6)         | 23.6(6)         | 34.6(7)         | 8.6(5)          | 10.8(6)         | 11.3(5)         |
| C10  | 20.1(6)         | 18.8(6)         | 27.4(6)         | 6.4(5)          | 7.2(5)          | 11.0(5)         |
| C11  | 22.1(6)         | 22.6(6)         | 24.6(6)         | 5.5(5)          | 11.2(5)         | 12.1(5)         |
| C12  | 20.6(6)         | 21.8(6)         | 21.0(6)         | 5.9(5)          | 10.2(5)         | 10.0(5)         |
| C13  | 21.5(6)         | 30.2(7)         | 38.0(8)         | -2.3(6)         | 12.4(6)         | 11.2(6)         |
| C14  | 31.1(7)         | 30.5(7)         | 39.8(8)         | -3.1(6)         | 18.6(7)         | 12.9(6)         |
| C15  | 25.4(7)         | 26.0(6)         | 25.2(7)         | -0.6(5)         | 10.2(6)         | 6.8(5)          |
| C16  | 19.8(6)         | 29.3(7)         | 25.2(7)         | 2.8(5)          | 7.7(5)          | 9.6(5)          |
| C17  | 21.9(6)         | 26.3(6)         | 22.6(6)         | 4.2(5)          | 10.4(5)         | 12.3(5)         |
| C18  | 12.3(5)         | 18.6(6)         | 22.5(6)         | 3.1(5)          | 4.1(5)          | 5.9(4)          |
| C19  | 14.6(5)         | 24.8(6)         | 24.8(6)         | 5.2(5)          | 6.8(5)          | 6.6(5)          |
| C20  | 20.7(6)         | 28.4(7)         | 29.9(7)         | 12.2(6)         | 8.1(5)          | 6.8(5)          |
| C21  | 29.4(7)         | 23.3(6)         | 37.4(8)         | 10.3(6)         | 6.5(6)          | 12.4(6)         |
| C22  | 25.8(7)         | 22.6(6)         | 32.0(7)         | -0.4(5)         | 4.2(6)          | 12.8(5)         |
| C23  | 20.7(6)         | 22.4(6)         | 23.2(6)         | 2.1(5)          | 5.6(5)          | 10.2(5)         |

**Table S11: Anisotropic Displacement Parameters ( $\text{\AA}^2 \times 10^3$ ) for 211143LT\_auto. The Anisotropic displacement factor exponent takes the form:  $-2\pi^2[h^2a^{*2}U_{11}+2hka^*b^*U_{12}+\dots]$ .**

| Atom | U <sub>11</sub> | U <sub>22</sub> | U <sub>33</sub> | U <sub>23</sub> | U <sub>13</sub> | U <sub>12</sub> |
|------|-----------------|-----------------|-----------------|-----------------|-----------------|-----------------|
| C24  | 23.4(6)         | 21.1(6)         | 21.2(6)         | 5.6(5)          | 9.4(5)          | 12.8(5)         |
| C26  | 20.7(6)         | 29.9(6)         | 25.9(6)         | 8.9(5)          | 13.5(5)         | 12.7(5)         |
| C27  | 20.0(6)         | 36.4(7)         | 26.3(7)         | 7.9(6)          | 9.9(5)          | 11.5(6)         |
| N2   | 18.9(5)         | 20.5(5)         | 19.2(5)         | 4.6(4)          | 8.1(4)          | 11.2(4)         |
| O25  | 17.9(4)         | 28.2(5)         | 20.4(4)         | 4.2(3)          | 9.1(4)          | 9.3(4)          |
| O28  | 29.0(5)         | 35.3(5)         | 21.0(5)         | 6.0(4)          | 12.7(4)         | 15.3(4)         |

**Table S12: Bond Lengths for 211143LT\_auto.**

| Atom | Atom | Length/ $\text{\AA}$ | Atom | Atom | Length/ $\text{\AA}$ |
|------|------|----------------------|------|------|----------------------|
| C1   | C11  | 1.3376(17)           | C13  | C14  | 1.3853(19)           |
| C1   | C12  | 1.4862(16)           | C14  | C15  | 1.3853(19)           |
| C1   | N2   | 1.4384(15)           | C15  | C16  | 1.3838(18)           |
| C3   | C4   | 1.3384(17)           | C16  | C17  | 1.3918(17)           |
| C3   | C24  | 1.4990(16)           | C18  | C19  | 1.4010(17)           |
| C3   | N2   | 1.4167(14)           | C18  | C23  | 1.4055(17)           |
| C4   | C5   | 1.4623(17)           | C18  | N2   | 1.3930(15)           |
| C5   | C6   | 1.4059(17)           | C19  | C20  | 1.3898(18)           |
| C5   | C10  | 1.4176(18)           | C20  | C21  | 1.389(2)             |
| C6   | C7   | 1.3825(19)           | C21  | C22  | 1.386(2)             |
| C7   | C8   | 1.390(2)             | C22  | C23  | 1.3869(17)           |
| C8   | C9   | 1.3838(19)           | C24  | O25  | 1.3378(14)           |
| C9   | C10  | 1.4082(17)           | C24  | O28  | 1.2100(14)           |
| C10  | C11  | 1.4640(17)           | C26  | C27  | 1.5019(17)           |
| C12  | C13  | 1.4009(17)           | C26  | O25  | 1.4583(14)           |
| C12  | C17  | 1.3944(17)           |      |      |                      |

**Table S13: Bond Angles for 211143LT\_auto.**

| Atom | Atom | Atom | Angle/ $^\circ$ | Atom | Atom | Atom | Angle/ $^\circ$ |
|------|------|------|-----------------|------|------|------|-----------------|
| C11  | C1   | C12  | 124.52(11)      | C14  | C13  | C12  | 120.86(12)      |
| C11  | C1   | N2   | 118.56(11)      | C15  | C14  | C13  | 120.65(12)      |
| N2   | C1   | C12  | 116.90(10)      | C16  | C15  | C14  | 119.16(12)      |
| C4   | C3   | C24  | 119.54(11)      | C15  | C16  | C17  | 120.51(12)      |
| C4   | C3   | N2   | 122.14(11)      | C16  | C17  | C12  | 120.88(11)      |
| N2   | C3   | C24  | 118.32(10)      | C19  | C18  | C23  | 118.29(11)      |
| C3   | C4   | C5   | 126.27(11)      | N2   | C18  | C19  | 121.00(11)      |

**Table S13: Bond Angles for 211143LT\_auto.**

| Atom | Atom | Atom | Angle/°    | Atom | Atom | Atom | Angle/°    |
|------|------|------|------------|------|------|------|------------|
| C6   | C5   | C4   | 117.14(11) | N2   | C18  | C23  | 120.71(11) |
| C6   | C5   | C10  | 118.72(12) | C20  | C19  | C18  | 120.35(12) |
| C10  | C5   | C4   | 124.07(11) | C21  | C20  | C19  | 121.15(12) |
| C7   | C6   | C5   | 121.57(13) | C22  | C21  | C20  | 118.59(12) |
| C6   | C7   | C8   | 119.81(12) | C21  | C22  | C23  | 121.22(13) |
| C9   | C8   | C7   | 119.76(12) | C22  | C23  | C18  | 120.39(12) |
| C8   | C9   | C10  | 121.63(13) | O25  | C24  | C3   | 111.38(10) |
| C5   | C10  | C11  | 123.44(11) | O28  | C24  | C3   | 124.01(11) |
| C9   | C10  | C5   | 118.43(12) | O28  | C24  | O25  | 124.61(11) |
| C9   | C10  | C11  | 117.56(11) | O25  | C26  | C27  | 107.32(9)  |
| C1   | C11  | C10  | 127.41(11) | C3   | N2   | C1   | 116.06(9)  |
| C13  | C12  | C1   | 121.12(11) | C18  | N2   | C1   | 121.40(9)  |
| C17  | C12  | C1   | 120.91(11) | C18  | N2   | C3   | 120.76(10) |
| C17  | C12  | C13  | 117.95(11) | C24  | O25  | C26  | 115.75(9)  |

**Table S14: Torsion Angles for 211143LT\_auto.**

| A  | B   | C   | D   | Angle/°     | A   | B   | C   | D   | Angle/°     |
|----|-----|-----|-----|-------------|-----|-----|-----|-----|-------------|
| C1 | C12 | C13 | C14 | 178.79(12)  | C12 | C13 | C14 | C15 | -0.4(2)     |
| C1 | C12 | C17 | C16 | -178.62(10) | C13 | C12 | C17 | C16 | -0.12(18)   |
| C3 | C4  | C5  | C6  | 154.20(12)  | C13 | C14 | C15 | C16 | 0.4(2)      |
| C3 | C4  | C5  | C10 | -28.78(19)  | C14 | C15 | C16 | C17 | -0.25(19)   |
| C3 | C24 | O25 | C26 | 177.78(9)   | C15 | C16 | C17 | C12 | 0.10(19)    |
| C4 | C3  | C24 | O25 | -164.79(10) | C17 | C12 | C13 | C14 | 0.3(2)      |
| C4 | C3  | C24 | O28 | 15.41(18)   | C18 | C19 | C20 | C21 | -0.11(19)   |
| C4 | C3  | N2  | C1  | 60.93(15)   | C19 | C18 | C23 | C22 | -1.11(17)   |
| C4 | C3  | N2  | C18 | -104.09(13) | C19 | C18 | N2  | C1  | 10.07(17)   |
| C4 | C5  | C6  | C7  | -179.73(11) | C19 | C18 | N2  | C3  | 174.28(10)  |
| C4 | C5  | C10 | C9  | -178.42(11) | C19 | C20 | C21 | C22 | -0.7(2)     |
| C4 | C5  | C10 | C11 | -7.29(18)   | C20 | C21 | C22 | C23 | 0.7(2)      |
| C5 | C6  | C7  | C8  | -2.13(19)   | C21 | C22 | C23 | C18 | 0.27(19)    |
| C5 | C10 | C11 | C1  | 33.13(19)   | C23 | C18 | C19 | C20 | 1.04(17)    |
| C6 | C5  | C10 | C9  | -1.45(17)   | C23 | C18 | N2  | C1  | -170.12(10) |
| C6 | C5  | C10 | C11 | 169.68(11)  | C23 | C18 | N2  | C3  | -5.91(16)   |
| C6 | C7  | C8  | C9  | -0.49(19)   | C24 | C3  | C4  | C5  | -177.70(10) |
| C7 | C8  | C9  | C10 | 2.12(19)    | C24 | C3  | N2  | C1  | -119.67(11) |
| C8 | C9  | C10 | C5  | -1.11(18)   | C24 | C3  | N2  | C18 | 75.31(14)   |
| C8 | C9  | C10 | C11 | -172.77(11) | C27 | C26 | O25 | C24 | -173.88(10) |
| C9 | C10 | C11 | C1  | -155.67(12) | N2  | C1  | C11 | C10 | 8.25(18)    |

**Table S14: Torsion Angles for 211143LT\_auto.**

| A   | B  | C   | D   | Angle/°     | A   | B   | C   | D   | Angle/°     |
|-----|----|-----|-----|-------------|-----|-----|-----|-----|-------------|
| C10 | C5 | C6  | C7  | 3.09(18)    | N2  | C1  | C12 | C13 | -175.55(11) |
| C11 | C1 | C12 | C13 | 2.52(19)    | N2  | C1  | C12 | C17 | 2.90(16)    |
| C11 | C1 | C12 | C17 | -179.02(11) | N2  | C3  | C4  | C5  | 1.69(19)    |
| C11 | C1 | N2  | C3  | -67.97(14)  | N2  | C3  | C24 | O25 | 15.80(14)   |
| C11 | C1 | N2  | C18 | 96.94(13)   | N2  | C3  | C24 | O28 | -164.00(11) |
| C12 | C1 | C11 | C10 | -169.79(11) | N2  | C18 | C19 | C20 | -179.15(11) |
| C12 | C1 | N2  | C3  | 110.22(11)  | N2  | C18 | C23 | C22 | 179.07(11)  |
| C12 | C1 | N2  | C18 | -84.86(13)  | O28 | C24 | O25 | C26 | -2.43(17)   |

**Table S15: Hydrogen Atom Coordinates ( $\text{\AA} \times 10^4$ ) and Isotropic Displacement Parameters ( $\text{\AA}^2 \times 10^3$ ) for 211143LT\_auto.**

| Atom | x        | y        | z        | U(eq) |
|------|----------|----------|----------|-------|
| H4   | 6203.25  | 6871.38  | 6391.39  | 27    |
| H6   | 9213.62  | 8692.68  | 7634.92  | 34    |
| H7   | 12004.25 | 9885.2   | 7871.83  | 39    |
| H8   | 12445.25 | 9573.05  | 6029.82  | 38    |
| H9   | 10094.17 | 8050.84  | 3974.05  | 33    |
| H11  | 7179.95  | 6025.49  | 2764.96  | 27    |
| H13  | 5375.96  | 4168.68  | 1254.52  | 38    |
| H14  | 3240.49  | 2225.45  | -585.56  | 41    |
| H15  | 299.02   | 1629.51  | -1500.07 | 35    |
| H16  | -482.5   | 3023.84  | -568.6   | 33    |
| H17  | 1647.34  | 4982.79  | 1270.69  | 28    |
| H19  | 4366.61  | 7475.4   | 1027.71  | 29    |
| H20  | 3874.13  | 9273.68  | 226.92   | 36    |
| H21  | 3392.11  | 10727.54 | 1416     | 41    |
| H22  | 3351.56  | 10323.8  | 3405.55  | 37    |
| H23  | 3832.69  | 8533.45  | 4227.98  | 29    |
| H26A | -280.11  | 5313     | 3808.44  | 29    |
| H26B | -22.96   | 3953.74  | 4033.34  | 29    |
| H27A | -1561.83 | 4467.37  | 1489.18  | 44    |
| H27B | -2581.26 | 3240.92  | 2022.16  | 44    |
| H27C | -1170.68 | 3171.47  | 1665.09  | 44    |

**Experimental**

Single crystals of  $\text{C}_{25}\text{H}_{21}\text{NO}_2$  [211143LT\_auto] were [ ]. A suitable crystal was selected and [ ] on a XtaLAB Synergy R, DW system, HyPix-Arc 150 diffractometer. The crystal was kept at 100.00(10) K during data collection. Using Olex2 [1], the structure was solved with the SHELXT

[2] structure solution program using Intrinsic Phasing and refined with the SHELXL [3] refinement package using Least Squares minimisation.

1. Dolomanov, O.V., Bourhis, L.J., Gildea, R.J., Howard, J.A.K. & Puschmann, H. (2009), *J. Appl. Cryst.* 42, 339-341.
2. Sheldrick, G.M. (2015). *Acta Cryst.* A71, 3-8.
3. Sheldrick, G.M. (2015). *Acta Cryst.* C71, 3-8.

### Crystal structure determination of [211143LT\_auto]

**Crystal Data** for  $C_{25}H_{21}NO_2$  ( $M = 367.43$  g/mol): triclinic, space group P-1 (no. 2),  $a = 9.6318(3)$  Å,  $b = 10.8319(4)$  Å,  $c = 11.3759(4)$  Å,  $\alpha = 92.501(3)^\circ$ ,  $\beta = 114.674(3)^\circ$ ,  $\gamma = 115.008(3)^\circ$ ,  $V = 941.83(7)$  Å<sup>3</sup>,  $Z = 2$ ,  $T = 100.00(10)$  K,  $\mu(\text{Cu K}\alpha) = 0.646$  mm<sup>-1</sup>,  $D_{\text{calc}} = 1.296$  g/cm<sup>3</sup>, 10151 reflections measured ( $8.878^\circ \leq 2\theta \leq 145.99^\circ$ ), 3521 unique ( $R_{\text{int}} = 0.0217$ ,  $R_{\text{sigma}} = 0.0248$ ) which were used in all calculations. The final  $R_1$  was 0.0363 ( $I > 2\sigma(I)$ ) and  $wR_2$  was 0.0975 (all data).

### Refinement model description

Number of restraints - 0, number of constraints - unknown.

Details:

1. Fixed Uiso

At 1.2 times of:

All C(H) groups, All C(H,H) groups

At 1.5 times of:

All C(H,H,H) groups

2.a Secondary CH2 refined with riding coordinates:

C26(H26A,H26B)

2.b Aromatic/amide H refined with riding coordinates:

C4(H4), C6(H6), C7(H7), C8(H8), C9(H9), C11(H11), C13(H13), C14(H14),

C15(H15), C16(H16), C17(H17), C19(H19), C20(H20), C21(H21), C22(H22), C23(H23)

2.c Idealised Me refined as rotating group:

C27(H27A,H27B,H27C)

### 7.3 X-ray crystallographic structure and data of compound (4q):

Experimental: The sample was dissolved in appropriate amount of ethyl acetate followed by the addition of pentane to furnish a saturated solution. Afterwards, the mixture was allowed to stand at room temperature to form the crystals.

*Crystal Measurement:*

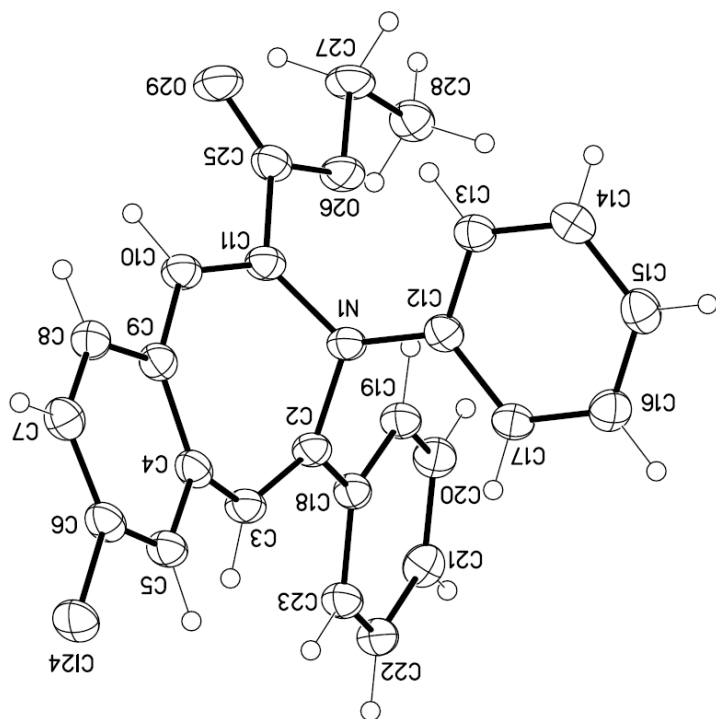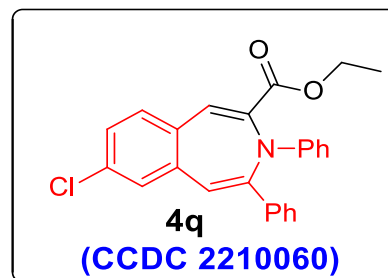

#### 2205108lt\_auto

**Table S16: Crystal data and structure refinement for 2205108lt\_auto.**

|                     |                                                   |
|---------------------|---------------------------------------------------|
| Identification code | 2205108lt_auto                                    |
| Empirical formula   | C <sub>25</sub> H <sub>20</sub> ClNO <sub>2</sub> |
| Formula weight      | 401.87                                            |
| Temperature/K       | 100.01(10)                                        |
| Crystal system      | monoclinic                                        |
| Space group         | C2/c                                              |
| a/Å                 | 11.3472(3)                                        |
| b/Å                 | 18.7364(4)                                        |
| c/Å                 | 18.9688(3)                                        |
| α/°                 | 90                                                |
| β/°                 | 103.100(2)                                        |
| γ/°                 | 90                                                |



|                                             |                                                               |
|---------------------------------------------|---------------------------------------------------------------|
| Volume/Å <sup>3</sup>                       | 3927.94(14)                                                   |
| Z                                           | 8                                                             |
| ρ <sub>calc</sub> /cm <sup>3</sup>          | 1.359                                                         |
| μ/mm <sup>-1</sup>                          | 1.890                                                         |
| F(000)                                      | 1680.0                                                        |
| Crystal size/mm <sup>3</sup>                | 0.14 × 0.05 × 0.02                                            |
| Radiation                                   | Cu Kα (λ = 1.54184)                                           |
| 2θ range for data collection/°              | 9.29 to 150.384                                               |
| Index ranges                                | -14 ≤ h ≤ 14, -22 ≤ k ≤ 22, -22 ≤ l ≤ 12                      |
| Reflections collected                       | 15232                                                         |
| Independent reflections                     | 3835 [R <sub>int</sub> = 0.0349, R <sub>sigma</sub> = 0.0281] |
| Data/restraints/parameters                  | 3835/0/263                                                    |
| Goodness-of-fit on F <sup>2</sup>           | 1.104                                                         |
| Final R indexes [I ≥ 2σ (I)]                | R <sub>1</sub> = 0.0447, wR <sub>2</sub> = 0.1255             |
| Final R indexes [all data]                  | R <sub>1</sub> = 0.0492, wR <sub>2</sub> = 0.1327             |
| Largest diff. peak/hole / e Å <sup>-3</sup> | 0.45/-0.71                                                    |

**Table S17: Fractional Atomic Coordinates (×10<sup>4</sup>) and Equivalent Isotropic Displacement Parameters (Å<sup>2</sup>×10<sup>3</sup>) for 2205108lt\_auto. U<sub>eq</sub> is defined as 1/3 of the trace of the orthogonalised U<sub>ij</sub> tensor.**

| Atom | x          | y          | z         | U(eq)   |
|------|------------|------------|-----------|---------|
| C2   | 5236.3(14) | 5999.3(9)  | 4172.7(8) | 22.9(3) |
| C3   | 4316.1(14) | 5591.3(9)  | 3818.2(8) | 24.3(3) |
| C4   | 4386.9(14) | 4870.9(9)  | 3535.2(8) | 23.9(3) |
| C5   | 3453.7(15) | 4666.1(9)  | 2942.4(8) | 25.7(3) |
| C6   | 3368.5(15) | 3966.7(10) | 2708.8(8) | 26.4(4) |
| C7   | 4148.3(15) | 3441.4(9)  | 3059.1(9) | 27.2(4) |
| C8   | 5065.9(15) | 3639.2(9)  | 3639.3(9) | 26.1(4) |
| C9   | 5232.0(14) | 4349.2(9)  | 3869.8(8) | 23.6(3) |
| C10  | 6243.9(14) | 4495.3(9)  | 4479.8(8) | 23.8(3) |
| C11  | 6796.1(14) | 5122.6(9)  | 4656.3(8) | 23.1(3) |
| C12  | 7095.9(14) | 5963.1(8)  | 3724.4(8) | 22.3(3) |
| C13  | 8239.3(15) | 5673.9(9)  | 3724.7(9) | 25.0(3) |
| C14  | 8874.2(15) | 5899.2(9)  | 3217.8(9) | 28.5(4) |
| C15  | 8390.2(16) | 6407.5(9)  | 2701.0(9) | 28.9(4) |
| C16  | 7255.1(16) | 6693.8(9)  | 2698.9(9) | 28.0(4) |
| C17  | 6612.7(15) | 6475.9(9)  | 3201.8(8) | 24.9(3) |
| C18  | 5064.4(14) | 6700.3(9)  | 4498.3(8) | 23.1(3) |
| C19  | 6023.7(15) | 7022.0(9)  | 4995.0(8) | 25.1(3) |

**Table S17: Fractional Atomic Coordinates ( $\times 10^4$ ) and Equivalent Isotropic Displacement Parameters ( $\text{\AA}^2 \times 10^3$ ) for 2205108lt\_auto.  $U_{\text{eq}}$  is defined as 1/3 of the trace of the orthogonalised  $U_{\text{IJ}}$  tensor.**

| Atom | <i>x</i>   | <i>y</i>   | <i>z</i>  | $U(\text{eq})$ |
|------|------------|------------|-----------|----------------|
| C20  | 5859.2(16) | 7661.3(9)  | 5328.5(9) | 27.7(4)        |
| C21  | 4747.5(16) | 8007.7(9)  | 5168.1(9) | 27.7(4)        |
| C22  | 3792.9(15) | 7701.3(9)  | 4666.7(9) | 27.5(4)        |
| C23  | 3944.1(15) | 7058.4(9)  | 4338.5(9) | 25.4(3)        |
| C25  | 7811.4(14) | 5146.1(9)  | 5321.8(9) | 24.9(3)        |
| C27  | 9045.9(16) | 5886.9(10) | 6201.1(9) | 30.3(4)        |
| C28  | 9018.1(16) | 6649.4(10) | 6441.1(9) | 29.7(4)        |
| Cl24 | 2234.8(4)  | 3728.2(2)  | 1962.6(2) | 31.04(16)      |
| N1   | 6459.5(12) | 5754.1(7)  | 4244.1(7) | 22.5(3)        |
| O26  | 8104.5(10) | 5812.7(6)  | 5538.4(6) | 27.5(3)        |
| O29  | 8293.8(11) | 4620.5(7)  | 5624.6(6) | 32.3(3)        |

**Table S18: Anisotropic Displacement Parameters ( $\text{\AA}^2 \times 10^3$ ) for 2205108lt\_auto. The Anisotropic displacement factor exponent takes the form:  $-2\pi^2[\text{h}^2\text{a}^{*2}U_{11}+2\text{hka}^*\text{b}^*U_{12}+\dots]$ .**

| Atom | $U_{11}$ | $U_{22}$ | $U_{33}$ | $U_{23}$ | $U_{13}$ | $U_{12}$ |
|------|----------|----------|----------|----------|----------|----------|
| C2   | 20.1(7)  | 29.7(8)  | 17.5(7)  | 3.2(6)   | 1.1(6)   | 0.9(6)   |
| C3   | 20.1(7)  | 29.8(9)  | 21.4(7)  | 2.3(6)   | 1.3(6)   | 1.6(6)   |
| C4   | 19.2(7)  | 30.7(9)  | 20.6(7)  | 0.2(6)   | 2.2(6)   | -4.4(6)  |
| C5   | 20.5(7)  | 31.9(9)  | 22.9(8)  | 1.8(7)   | 1.3(6)   | -0.8(6)  |
| C6   | 21.3(8)  | 34.9(9)  | 21.3(8)  | -1.3(7)  | 1.3(6)   | -4.7(7)  |
| C7   | 26.1(8)  | 28.8(9)  | 26.2(8)  | -3.5(7)  | 4.8(7)   | -4.1(7)  |
| C8   | 24.0(8)  | 28.5(9)  | 25.1(8)  | 2.0(6)   | 3.9(7)   | -1.2(6)  |
| C9   | 21.2(7)  | 29.1(8)  | 20.2(7)  | 1.0(6)   | 4.0(6)   | -1.5(6)  |
| C10  | 21.0(8)  | 29.2(8)  | 19.9(7)  | 1.6(6)   | 1.9(6)   | 1.4(6)   |
| C11  | 19.7(7)  | 28.2(8)  | 19.8(7)  | 0.6(6)   | 1.3(6)   | 1.2(6)   |
| C12  | 21.6(8)  | 24.2(8)  | 19.2(7)  | -3.3(6)  | 0.6(6)   | -2.6(6)  |
| C13  | 22.4(8)  | 26.6(8)  | 23.9(8)  | -1.5(6)  | 1.2(6)   | -0.3(6)  |
| C14  | 22.5(8)  | 33.0(9)  | 29.8(9)  | -5.1(7)  | 5.5(7)   | -0.5(6)  |
| C15  | 27.9(9)  | 33.8(9)  | 25.9(8)  | -1.2(7)  | 7.9(7)   | -4.7(7)  |
| C16  | 29.7(9)  | 30.4(9)  | 22.1(8)  | 0.6(6)   | 2.0(6)   | -1.9(7)  |
| C17  | 21.3(8)  | 28.2(8)  | 22.9(8)  | -1.3(6)  | 0.5(6)   | 0.0(6)   |
| C18  | 20.4(7)  | 27.5(8)  | 20.3(7)  | 2.4(6)   | 2.5(6)   | -0.8(6)  |
| C19  | 21.3(8)  | 29.7(9)  | 22.1(8)  | 1.9(6)   | 0.3(6)   | -0.5(6)  |
| C20  | 27.0(8)  | 30.5(9)  | 23.0(8)  | -0.7(6)  | 0.5(6)   | -2.3(7)  |
| C21  | 31.7(9)  | 26.8(9)  | 24.2(8)  | -0.6(6)  | 5.8(7)   | -0.3(7)  |
| C22  | 23.9(8)  | 30.3(9)  | 27.5(8)  | 4.3(7)   | 4.5(6)   | 2.6(6)   |

**Table S18: Anisotropic Displacement Parameters ( $\text{\AA}^2 \times 10^3$ ) for 2205108lt\_auto. The Anisotropic displacement factor exponent takes the form:  $-2\pi^2[h^2a^{*2}U_{11}+2hka^*b^*U_{12}+\dots]$ .**

| Atom | U <sub>11</sub> | U <sub>22</sub> | U <sub>33</sub> | U <sub>23</sub> | U <sub>13</sub> | U <sub>12</sub> |
|------|-----------------|-----------------|-----------------|-----------------|-----------------|-----------------|
| C23  | 20.9(8)         | 29.9(9)         | 23.5(8)         | 1.4(6)          | 0.9(6)          | 0.2(6)          |
| C25  | 19.5(7)         | 30.3(9)         | 23.4(8)         | 0.3(6)          | 1.9(6)          | -0.7(6)         |
| C27  | 23.3(8)         | 37.1(10)        | 24.1(8)         | 0.1(7)          | -8.3(7)         | 0.9(7)          |
| C28  | 27.0(8)         | 36.6(10)        | 23.3(8)         | -0.8(7)         | 1.2(6)          | -2.0(7)         |
| Cl24 | 26.3(2)         | 37.2(3)         | 25.5(2)         | -3.71(15)       | -2.71(17)       | -5.74(15)       |
| N1   | 18.7(6)         | 26.0(7)         | 21.3(6)         | 2.0(5)          | 1.3(5)          | 1.6(5)          |
| O26  | 23.1(6)         | 30.6(6)         | 23.6(6)         | 0.4(5)          | -6.0(5)         | -1.5(5)         |
| O29  | 27.8(6)         | 31.8(7)         | 31.4(6)         | 2.8(5)          | -5.7(5)         | 3.5(5)          |

**Table S19: Bond Lengths for 2205108lt\_auto.**

| Atom Atom | Length/ $\text{\AA}$ | Atom Atom | Length/ $\text{\AA}$ |
|-----------|----------------------|-----------|----------------------|
| C2 C3     | 1.345(2)             | C12 C17   | 1.400(2)             |
| C2 C18    | 1.483(2)             | C12 N1    | 1.403(2)             |
| C2 N1     | 1.439(2)             | C13 C14   | 1.391(2)             |
| C3 C4     | 1.461(2)             | C14 C15   | 1.388(3)             |
| C4 C5     | 1.412(2)             | C15 C16   | 1.395(2)             |
| C4 C9     | 1.415(2)             | C16 C17   | 1.387(2)             |
| C5 C6     | 1.380(2)             | C18 C19   | 1.404(2)             |
| C6 C7     | 1.388(2)             | C18 C23   | 1.408(2)             |
| C6 Cl24   | 1.7414(16)           | C19 C20   | 1.387(2)             |
| C7 C8     | 1.383(2)             | C20 C21   | 1.390(2)             |
| C8 C9     | 1.400(2)             | C21 C22   | 1.393(2)             |
| C9 C10    | 1.460(2)             | C22 C23   | 1.384(2)             |
| C10 C11   | 1.338(2)             | C25 O26   | 1.333(2)             |
| C11 C25   | 1.505(2)             | C25 O29   | 1.207(2)             |
| C11 N1    | 1.422(2)             | C27 C28   | 1.502(2)             |
| C12 C13   | 1.406(2)             | C27 O26   | 1.4601(18)           |

**Table S20: Bond Angles for 2205108lt\_auto.**

| Atom Atom Atom | Angle/ $^\circ$ | Atom Atom Atom | Angle/ $^\circ$ |
|----------------|-----------------|----------------|-----------------|
| C3 C2 C18      | 123.45(15)      | N1 C12 C13     | 120.92(14)      |
| C3 C2 N1       | 119.25(15)      | C14 C13 C12    | 120.34(15)      |
| N1 C2 C18      | 117.30(13)      | C15 C14 C13    | 120.82(16)      |
| C2 C3 C4       | 127.41(15)      | C14 C15 C16    | 118.91(15)      |
| C5 C4 C3       | 116.73(15)      | C17 C16 C15    | 120.92(16)      |

**Table S20: Bond Angles for 2205108lt\_auto.**

| Atom | Atom | Atom | Angle/°    | Atom | Atom | Atom | Angle/°    |
|------|------|------|------------|------|------|------|------------|
| C5   | C4   | C9   | 118.63(15) | C16  | C17  | C12  | 120.44(15) |
| C9   | C4   | C3   | 124.15(14) | C19  | C18  | C2   | 120.31(14) |
| C6   | C5   | C4   | 119.96(15) | C19  | C18  | C23  | 117.68(15) |
| C5   | C6   | C7   | 121.94(15) | C23  | C18  | C2   | 122.00(14) |
| C5   | C6   | Cl24 | 119.34(13) | C20  | C19  | C18  | 120.86(15) |
| C7   | C6   | Cl24 | 118.72(13) | C19  | C20  | C21  | 120.85(15) |
| C8   | C7   | C6   | 118.30(16) | C20  | C21  | C22  | 118.94(16) |
| C7   | C8   | C9   | 121.80(16) | C23  | C22  | C21  | 120.60(16) |
| C4   | C9   | C10  | 123.88(15) | C22  | C23  | C18  | 121.04(15) |
| C8   | C9   | C4   | 119.14(15) | O26  | C25  | C11  | 112.10(14) |
| C8   | C9   | C10  | 116.87(15) | O29  | C25  | C11  | 123.63(15) |
| C11  | C10  | C9   | 127.06(15) | O29  | C25  | O26  | 124.27(15) |
| C10  | C11  | C25  | 117.50(15) | O26  | C27  | C28  | 106.86(13) |
| C10  | C11  | N1   | 122.76(14) | C11  | N1   | C2   | 116.78(13) |
| N1   | C11  | C25  | 119.74(14) | C12  | N1   | C2   | 118.93(13) |
| C17  | C12  | C13  | 118.57(15) | C12  | N1   | C11  | 120.10(13) |
| C17  | C12  | N1   | 120.50(14) | C25  | O26  | C27  | 115.93(13) |

**Table S21: Torsion Angles for 2205108lt\_auto.**

| A  | B   | C   | D    | Angle/°     | A   | B   | C   | D   | Angle/°     |
|----|-----|-----|------|-------------|-----|-----|-----|-----|-------------|
| C2 | C3  | C4  | C5   | -153.82(16) | C13 | C12 | C17 | C16 | -0.3(2)     |
| C2 | C3  | C4  | C9   | 34.3(2)     | C13 | C12 | N1  | C2  | -172.77(14) |
| C2 | C18 | C19 | C20  | -177.00(14) | C13 | C12 | N1  | C11 | -16.5(2)    |
| C2 | C18 | C23 | C22  | 177.86(14)  | C13 | C14 | C15 | C16 | 0.3(3)      |
| C3 | C2  | C18 | C19  | 165.53(15)  | C14 | C15 | C16 | C17 | -0.2(3)     |
| C3 | C2  | C18 | C23  | -13.0(2)    | C15 | C16 | C17 | C12 | 0.2(2)      |
| C3 | C2  | N1  | C11  | -64.37(19)  | C17 | C12 | C13 | C14 | 0.4(2)      |
| C3 | C2  | N1  | C12  | 92.69(18)   | C17 | C12 | N1  | C2  | 8.5(2)      |
| C3 | C4  | C5  | C6   | -171.28(15) | C17 | C12 | N1  | C11 | 164.74(14)  |
| C3 | C4  | C9  | C8   | 167.05(15)  | C18 | C2  | C3  | C4  | -174.26(14) |
| C3 | C4  | C9  | C10  | -9.0(2)     | C18 | C2  | N1  | C11 | 115.83(15)  |
| C4 | C5  | C6  | C7   | 2.8(2)      | C18 | C2  | N1  | C12 | -87.11(17)  |
| C4 | C5  | C6  | Cl24 | -178.40(12) | C18 | C19 | C20 | C21 | -1.4(2)     |
| C4 | C9  | C10 | C11  | -25.3(3)    | C19 | C18 | C23 | C22 | -0.7(2)     |
| C5 | C4  | C9  | C8   | -4.7(2)     | C19 | C20 | C21 | C22 | 0.2(2)      |
| C5 | C4  | C9  | C10  | 179.23(14)  | C20 | C21 | C22 | C23 | 0.7(2)      |
| C5 | C6  | C7  | C8   | -2.9(2)     | C21 | C22 | C23 | C18 | -0.4(2)     |
| C6 | C7  | C8  | C9   | -0.9(2)     | C23 | C18 | C19 | C20 | 1.6(2)      |

**Table S21: Torsion Angles for 2205108lt\_auto.**

| A   | B   | C   | D   | Angle/°     | A    | B   | C   | D   | Angle/°     |
|-----|-----|-----|-----|-------------|------|-----|-----|-----|-------------|
| C7  | C8  | C9  | C4  | 4.7(2)      | C25  | C11 | N1  | C2  | -119.77(16) |
| C7  | C8  | C9  | C10 | -178.94(14) | C25  | C11 | N1  | C12 | 83.45(18)   |
| C8  | C9  | C10 | C11 | 158.58(16)  | C28  | C27 | O26 | C25 | -166.47(14) |
| C9  | C4  | C5  | C6  | 1.1(2)      | C124 | C6  | C7  | C8  | 178.31(12)  |
| C9  | C10 | C11 | C25 | 178.90(14)  | N1   | C2  | C3  | C4  | 5.9(2)      |
| C9  | C10 | C11 | N1  | -1.0(3)     | N1   | C2  | C18 | C19 | -14.7(2)    |
| C10 | C11 | C25 | O26 | -165.61(14) | N1   | C2  | C18 | C23 | 166.79(14)  |
| C10 | C11 | C25 | O29 | 13.9(2)     | N1   | C11 | C25 | O26 | 14.3(2)     |
| C10 | C11 | N1  | C2  | 60.1(2)     | N1   | C11 | C25 | O29 | -166.23(15) |
| C10 | C11 | N1  | C12 | -96.66(19)  | N1   | C12 | C13 | C14 | -178.35(15) |
| C11 | C25 | O26 | C27 | 177.31(13)  | N1   | C12 | C17 | C16 | 178.51(15)  |
| C12 | C13 | C14 | C15 | -0.5(2)     | O29  | C25 | O26 | C27 | -2.2(2)     |

**Table S22: Hydrogen Atom Coordinates ( $\text{\AA} \times 10^4$ ) and Isotropic Displacement Parameters ( $\text{\AA}^2 \times 10^3$ ) for 2205108lt\_auto.**

| Atom | x       | y       | z       | U(eq) |
|------|---------|---------|---------|-------|
| H3   | 3530.44 | 5794.51 | 3743.23 | 29    |
| H5   | 2884.82 | 5009.59 | 2704.6  | 31    |
| H7   | 4054.19 | 2958.32 | 2904.41 | 33    |
| H8   | 5597.96 | 3283.41 | 3888.13 | 31    |
| H10  | 6542.9  | 4102.52 | 4784.8  | 29    |
| H13  | 8580.06 | 5322.82 | 4072.87 | 30    |
| H14  | 9648.8  | 5702.54 | 3225.65 | 34    |
| H15  | 8824.97 | 6557.89 | 2354.23 | 35    |
| H16  | 6917.08 | 7043.14 | 2348.13 | 34    |
| H17  | 5839.69 | 6675.82 | 3191.6  | 30    |
| H19  | 6795.52 | 6798.92 | 5104.01 | 30    |
| H20  | 6515.06 | 7865.05 | 5670.98 | 33    |
| H21  | 4640.28 | 8446.38 | 5396.72 | 33    |
| H22  | 3031.04 | 7935.71 | 4548.97 | 33    |
| H23  | 3281.7  | 6855.62 | 4000.22 | 31    |
| H27A | 9847.71 | 5770.05 | 6107.77 | 36    |
| H27B | 8887.23 | 5560.62 | 6579.56 | 36    |
| H28A | 9198.55 | 6965.41 | 6067.52 | 45    |
| H28B | 9624.51 | 6718.91 | 6893.96 | 45    |
| H28C | 8213.27 | 6761.42 | 6518.42 | 45    |

**Experimental**

Single crystals of C<sub>25</sub>H<sub>20</sub>ClNO<sub>2</sub> [2205108lt\_auto] were [ ]. A suitable crystal was selected and [ ] on a XtaLAB Synergy R, DW system, HyPix-Arc 150 diffractometer. The crystal was kept at 100.01(10) K during data collection. Using Olex2 [1], the structure was solved with the SHELXT [2] structure solution program using Intrinsic Phasing and refined with the SHELXL [3] refinement package using Least Squares minimisation.

1. Dolomanov, O.V., Bourhis, L.J., Gildea, R.J, Howard, J.A.K. & Puschmann, H. (2009), J. Appl. Cryst. 42, 339-341.
2. Sheldrick, G.M. (2015). Acta Cryst. A71, 3-8.
3. Sheldrick, G.M. (2015). Acta Cryst. C71, 3-8.

### Crystal structure determination of [2205108lt\_auto]

**Crystal Data** for C<sub>25</sub>H<sub>20</sub>ClNO<sub>2</sub> (*M* = 401.87 g/mol): monoclinic, space group C2/c (no. 15), *a* = 11.3472(3) Å, *b* = 18.7364(4) Å, *c* = 18.9688(3) Å, *β* = 103.100(2)°, *V* = 3927.94(14) Å<sup>3</sup>, *Z* = 8, *T* = 100.01(10) K, *μ*(Cu Kα) = 1.890 mm<sup>-1</sup>, *D*<sub>calc</sub> = 1.359 g/cm<sup>3</sup>, 15232 reflections measured (9.29° ≤ 2θ ≤ 150.384°), 3835 unique (*R*<sub>int</sub> = 0.0349, *R*<sub>sigma</sub> = 0.0281) which were used in all calculations. The final *R*<sub>1</sub> was 0.0447 (*I* > 2σ(*I*)) and *wR*<sub>2</sub> was 0.1327 (all data).

### Refinement model description

Number of restraints - 0, number of constraints - unknown.

Details:

1. Fixed Uiso

At 1.2 times of:

All C(H) groups, All C(H,H) groups

At 1.5 times of:

All C(H,H,H) groups

2.a Secondary CH<sub>2</sub> refined with riding coordinates:

C27(H27A,H27B)

2.b Aromatic/amide H refined with riding coordinates:

C3(H3), C5(H5), C7(H7), C8(H8), C10(H10), C13(H13), C14(H14), C15(H15),  
C16(H16), C17(H17), C19(H19), C20(H20), C21(H21), C22(H22), C23(H23)

2.c Idealised Me refined as rotating group:

C28(H28A,H28B,H28C)

(8) <sup>1</sup>H and <sup>13</sup>C spectra key compounds:

Solvent: CDCl<sub>3</sub>  
SFO1: 500 MHz

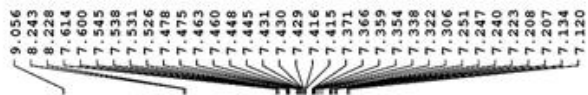

1.606

DT-03-108-3CL Imine-HPL

Current Data Parameters  
NAME SDT-03-108-3CL-Imin  
EXPNO 1  
PROCNO 1

F2 - Processing parameters  
SI 32768  
SF 499.7727652 MHz  
WDW EM  
SSB 0  
LB 0.30 Hz  
GB 0  
PC 1.00

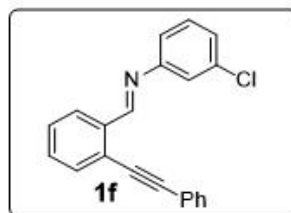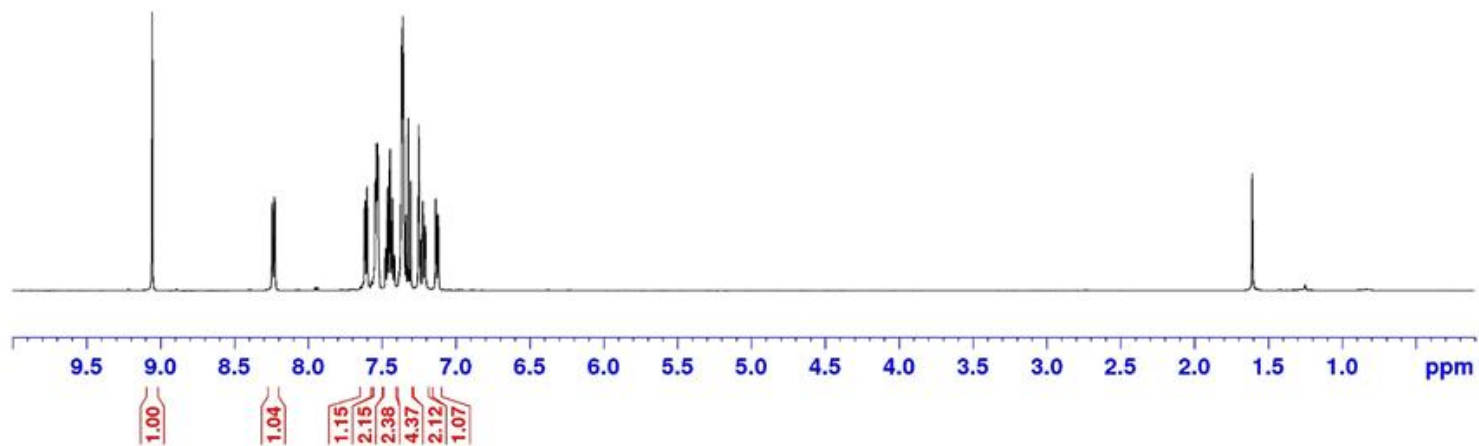

Solvent: CDCl<sub>3</sub>  
SFO1: 125 MHz

SDT-03-108-3Cl-Imine-HPLC

159.91 153.45 136.26 134.79 132.74 131.58 131.25 130.24 128.85 128.73 128.54 128.52 128.52 126.71 126.00 125.33 122.66 121.24 119.36

95.70 86.10 77.29 77.03 76.78

Current Data Parameters  
NAME SDT-03-108-3Cl-Imine-HPLC-13C-E14  
EXPNO 1  
PROCNO 1  
F2 - Processing parameters  
F2 43134  
SF 125.6479592 MHz  
WDW EM  
SSB 0  
LB 0.30 Hz  
GB 0  
PC 1.00

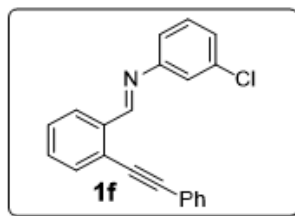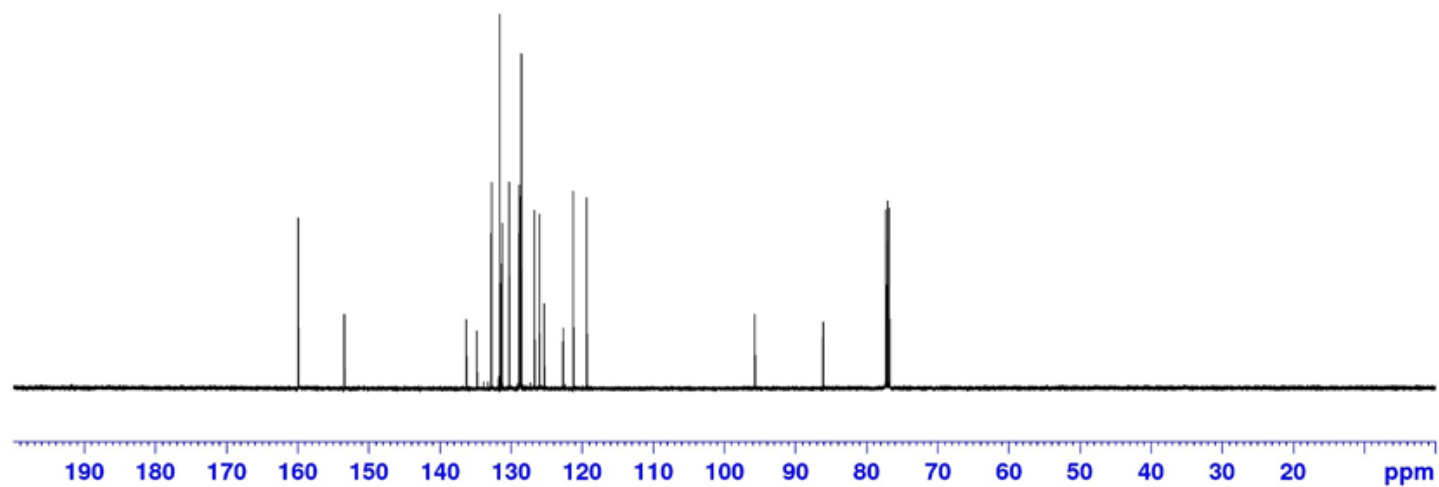



Solvent: CDCl<sub>3</sub>  
SFO1: 500 MHz

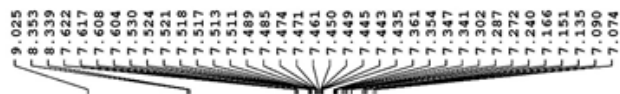

1.587

### SDT-03-108-2Cl-Imine-HPLC

Current Data Parameters  
NAME SDT-03-108-2Cl-Imin  
EXPNO 1  
PROCNO 1

F2 - Processing parameters  
SI 32768  
SF 499.7727652 MHz  
WDW EM  
SSB 0  
LB 0.30 Hz  
GB 0  
PC 1.00

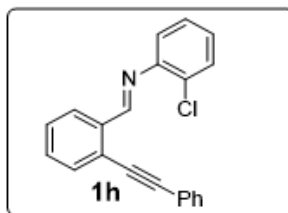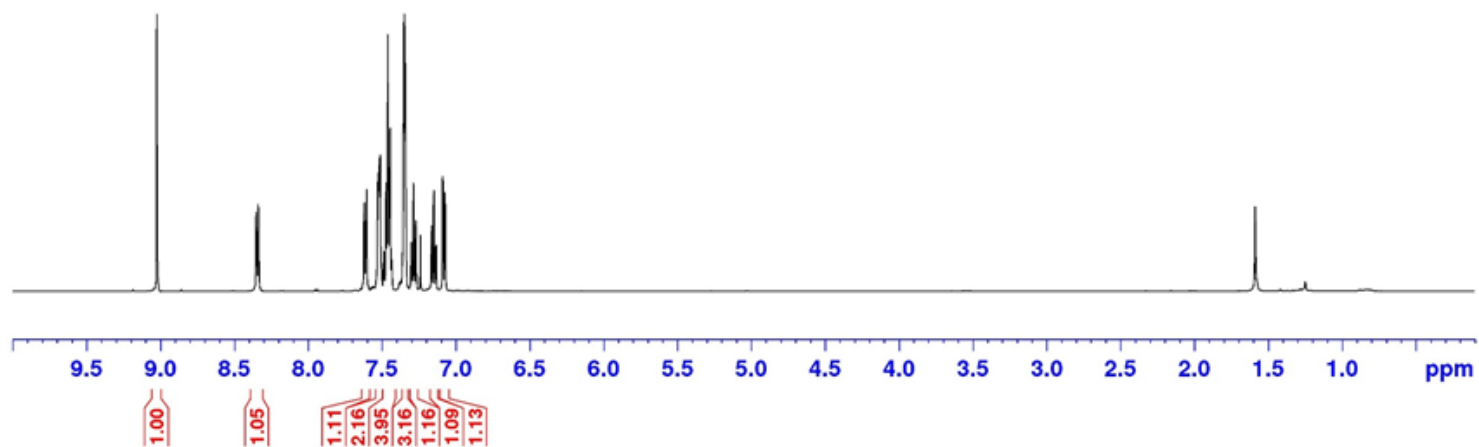

Solvent: CDCl<sub>3</sub>  
SFO1: 125 MHz

SDT-03-108-2Cl-Imine-HPLC

|        |        |        |        |        |        |        |        |        |        |        |        |        |        |        |        |       |       |       |       |       |
|--------|--------|--------|--------|--------|--------|--------|--------|--------|--------|--------|--------|--------|--------|--------|--------|-------|-------|-------|-------|-------|
| 160.46 | 149.54 | 136.28 | 132.68 | 131.55 | 131.27 | 129.97 | 128.76 | 128.45 | 128.08 | 127.68 | 126.98 | 126.53 | 125.25 | 122.66 | 120.07 | 95.44 | 86.07 | 77.25 | 77.00 | 76.75 |
|--------|--------|--------|--------|--------|--------|--------|--------|--------|--------|--------|--------|--------|--------|--------|--------|-------|-------|-------|-------|-------|

Current Data Parameters  
NAME SDT-03-108-2Cl-Imine-HPLC-13C-E14  
EXPNO 1  
PROCNO 1  
F2 - Processing parameters  
F2 43234  
SF 125.6478634 MHz  
WDW EM  
SSB 0  
LB 0.30 Hz  
GB 0  
PC 1.00

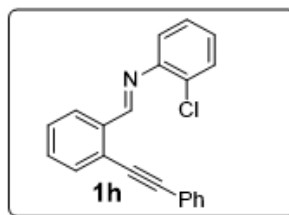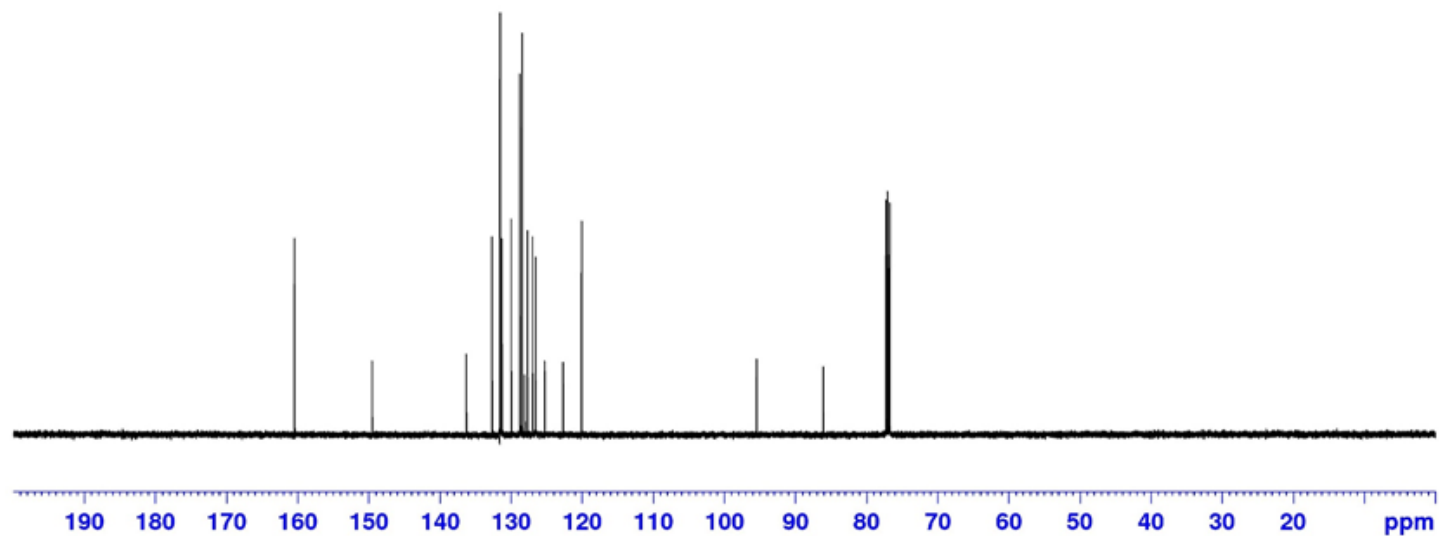

Solvent: CDCl<sub>3</sub>  
SFO1: 400 MHz

**SDT-03-149-P**

Current Data Parameters  
NAME SDT-03-149-P  
EXPNO 1  
PROCNO 1

F2 - Acquisition Parameters  
Date\_ 20220523  
Time 22.18  
INSTRUM spect  
PROBHD 5 mm DUL 13C-1  
PULPROG zg30  
TD 32768  
SOLVENT CDCl<sub>3</sub>  
NS 10  
DS 0  
SWH 6410.256 Hz  
FIDRES 0.195625 Hz  
AQ 2.5559039 sec  
RG 512  
DW 78.000 usec  
DE 6.00 usec  
TE 300.0 K  
D1 2.00000000 sec  
TDO 1

==== CHANNEL f1 =====  
NUC1 1H  
P1 10.00 usec  
PL1 -2.40 dB  
SFO1 400.1528010 MHz

F2 - Processing parameters  
SI 16384  
SF 400.1500168 MHz  
WDW EM  
SSB 0  
LB 0 Hz  
GB 0  
PC 1.00

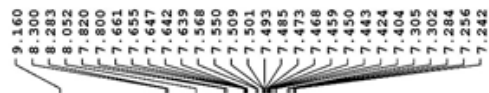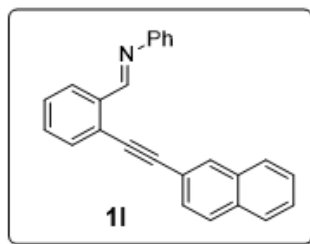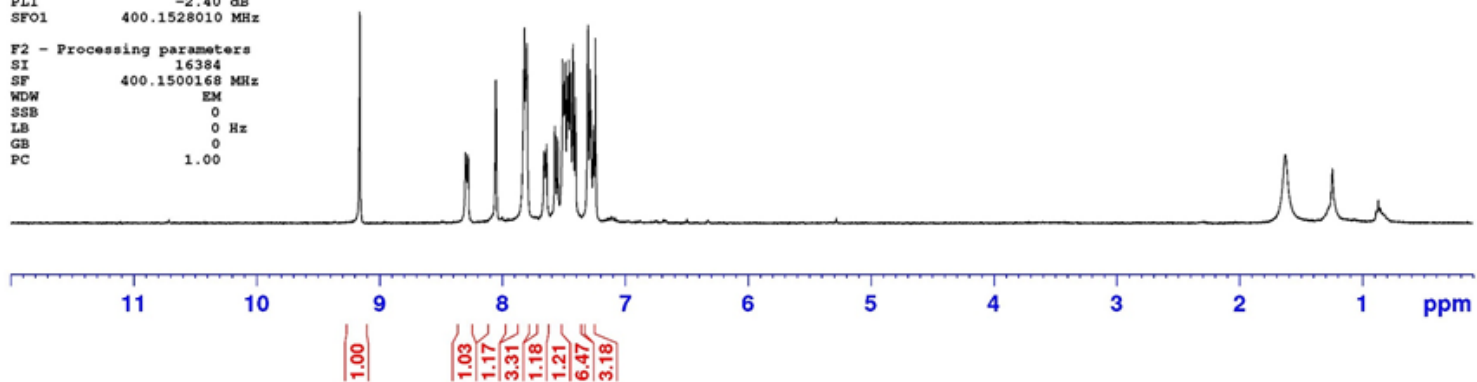

Solvent: CDCl<sub>3</sub>  
SFO1: 100 MHz

SDT-03-149-Heating-CR

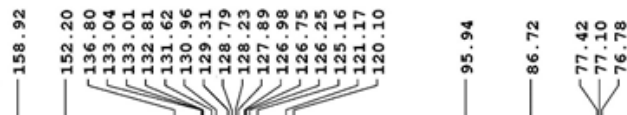

Current Data Parameters  
NAME SDT-03-149-CR  
EXPNO 3  
PROCNO 1

F2 - Acquisition Parameters  
Date\_ 20220503  
Time 23.08  
INSTRUM spect  
PROBHD 5 mm DUL 13C-1  
PULPROG zgpg30  
TD 65536  
SOLVENT cdcl3  
NS 80  
DS 0  
SWH 22727.273 Hz  
FIDRES 0.346791 Hz  
AQ 1.4417920 sec  
RG 2050  
DM 22.000 usec  
DE 6.00 usec  
TE 300.0 K  
D1 2.00000000 sec  
d11 0.03000000 sec  
DELTA 1.89999998 sec  
TD0 1

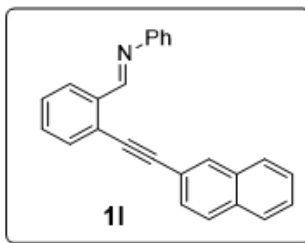

\*\*\*\*\* CHANNEL f1 \*\*\*\*\*  
NUC1 13C  
P1 9.70 usec  
PL1 -0.50 dB  
SFO1 100.6288660 MHz

\*\*\*\*\* CHANNEL f2 \*\*\*\*\*  
CPDPRG2 waltz16  
NUC2 1R  
PCPD2 90.00 usec  
PL2 -2.40 dB  
PL12 15.10 dB  
PL13 18.10 dB  
SFO2 400.1516010 MHz

F2 - Processing parameters  
SI 32768  
SF 100.6177990 MHz  
WDW EM  
SSB 0  
LB 3.00 Hz  
GB 0  
PC 1.00

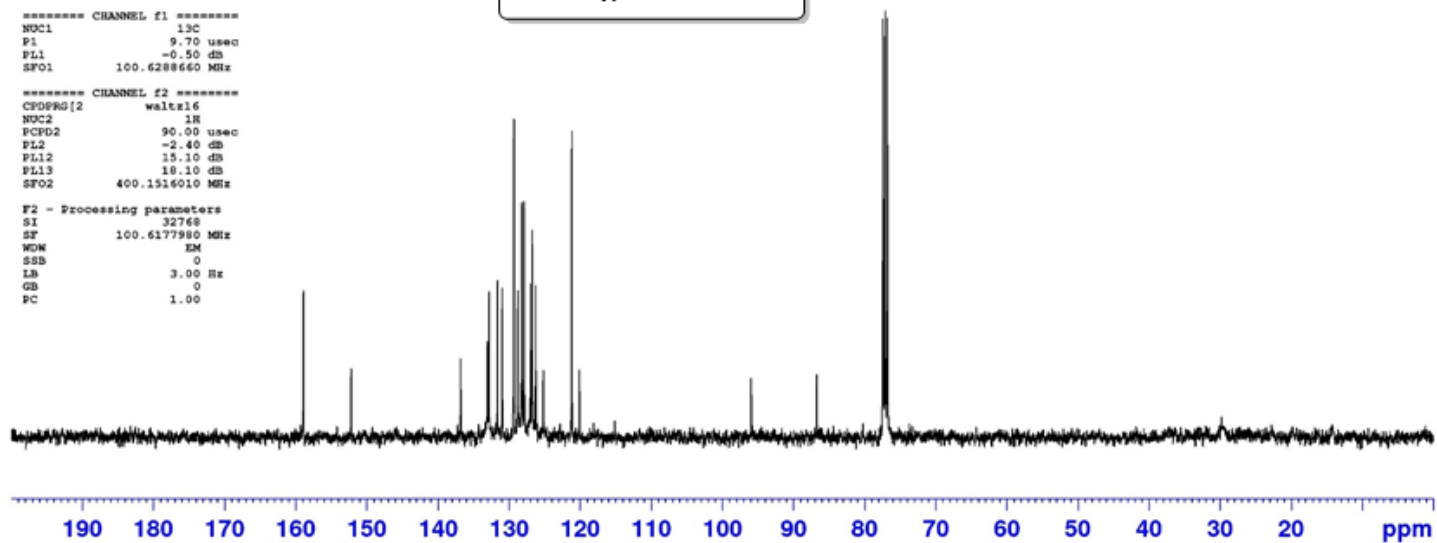

Solvent: CDCl<sub>3</sub>  
SFO1: 400 MHz

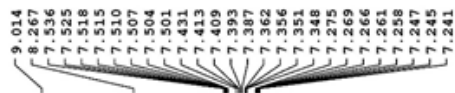

1.555

SDT-03-131-CR

Current Data Parameters  
NAME SDT-03-131  
EXPNO 1  
PROCNO 1

F2 - Acquisition Parameters  
Date\_ 20220415  
Time 15.03  
INSTRUM spect  
PROBHD 5 mm DUL 13C-1  
PULPROG zg30  
TD 32768  
SOLVENT CDCl3  
NS 10  
DS 0  
SWH 6410.256 Hz  
FIDRES 0.195625 Hz  
AQ 2.5559039 sec  
RG 724  
DW 78.000 usec  
DE 6.00 usec  
TE 300.0 K  
D1 2.00000000 sec  
TD0 1

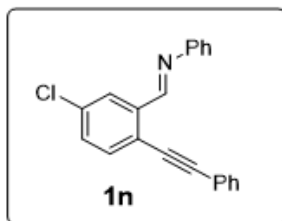

===== CHANNEL f1 =====  
NUC1 1H  
P1 10.00 usec  
PL1 -2.40 dB  
SFO1 400.1528010 MHz

F2 - Processing parameters  
SI 16384  
SF 400.1500168 MHz  
WDW EM  
SSB 0  
LB 0 Hz  
GB 0  
PC 31.00

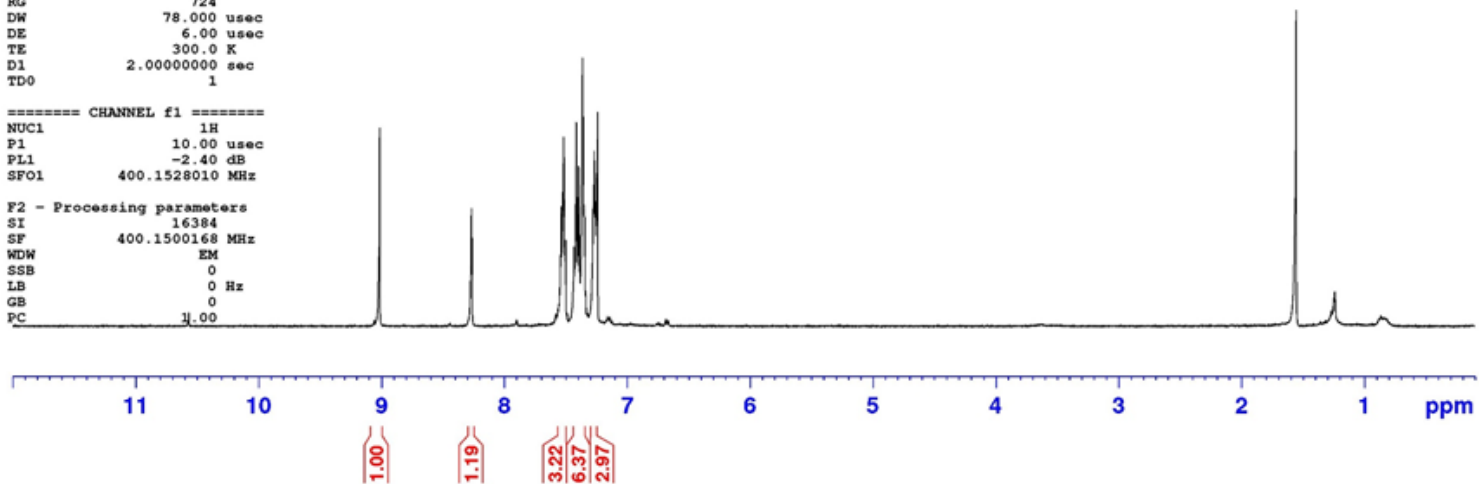

Solvent: CDCl<sub>3</sub>  
SFO1: 100 MHz

157.24  
151.46  
138.02  
134.95  
133.76  
131.51  
130.87  
129.25  
128.89  
128.46  
126.55  
126.51  
123.28  
122.39  
121.03  
96.16  
85.28  
77.31  
76.99  
76.68

SDT-03-131-CR

Current Data Parameters  
NAME SDT-03-131  
EXPNO 2  
PROCNO 1

F2 - Acquisition Parameters  
Date\_ 20220419  
Time 23.08  
INSTRUM spect  
PROBHD 5 mm DUL 13C-1  
PULPROG zgpg30  
TD 45536  
SOLVENT CDCl<sub>3</sub>  
NS 73  
DS 0  
SWH 22727.273 Hz  
FIDRES 0.346200 Hz  
AQ 1.4417920 sec  
RG 2050  
DM 22.000 usec  
DE 6.00 usec  
TE 300.0 K  
D1 2.00000000 sec  
d11 0.03000000 sec  
DELTA 1.89999998 sec  
TDO 1

----- CHANNEL f1 -----  
NUC1 13C  
P1 9.70 usec  
PL1 -0.50 dB  
SFO1 100.6288460 MHz

----- CHANNEL f2 -----  
CFOF2[2] waltz16  
PCPD 90.00 usec  
PL2 -2.40 dB  
PL12 15.10 dB  
PL13 18.10 dB  
SFO2 400.1516010 MHz

F2 - Processing parameters  
SI 32768  
SF 100.6178082 MHz  
MCW 8M  
SSB 0  
LB 3.00 Hz  
GB 0  
PC 1.00

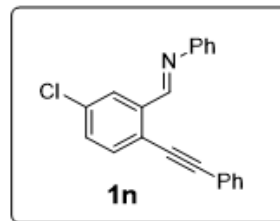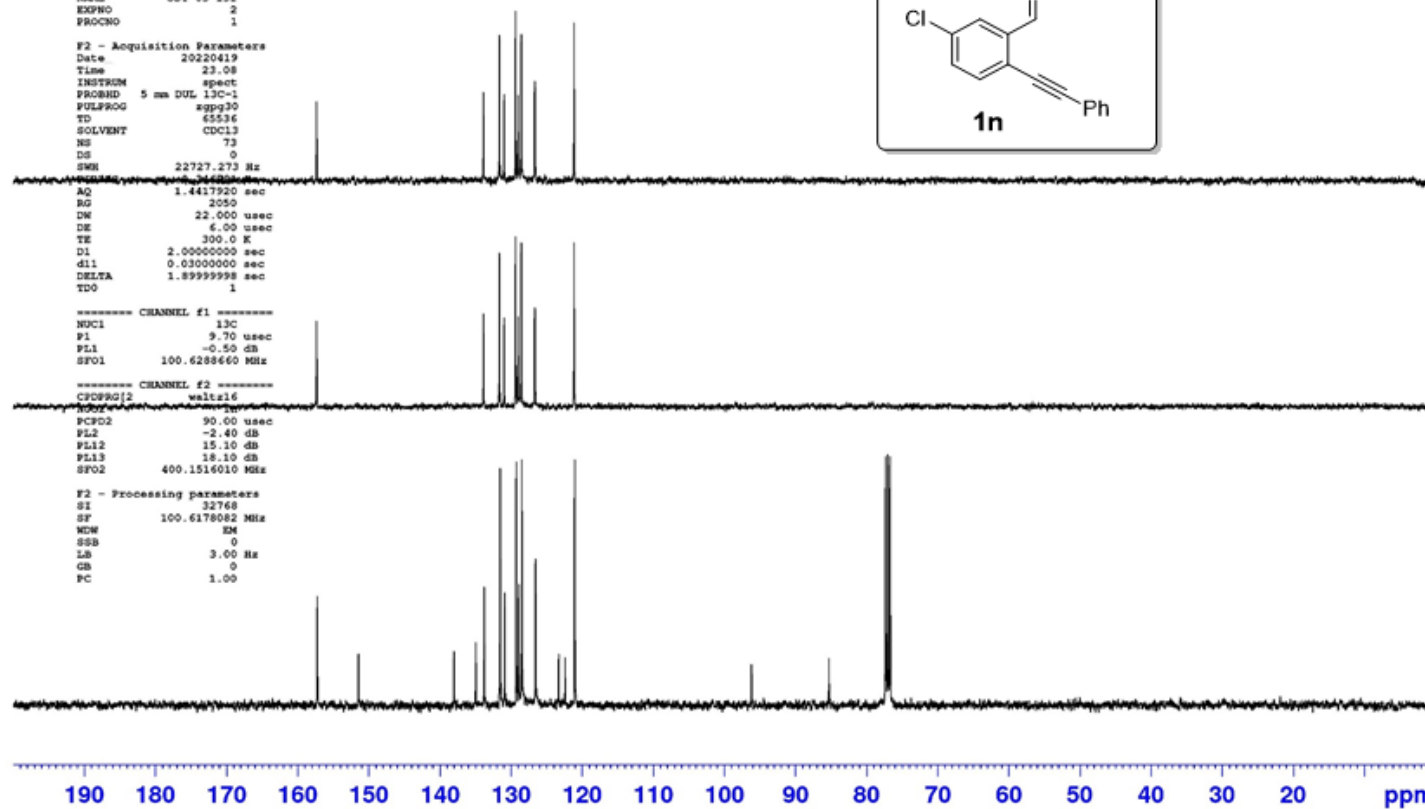

Solvent: CDCl<sub>3</sub>  
SFO1: 500 MHz

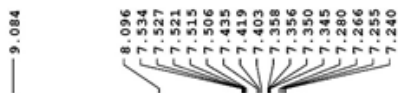

SDT-03-162-HPLC

Current Data Parameters  
NAME SDT-03-165-HPLC-P.f  
EXPNO 1  
PROCNO 1

F2 - Processing parameters  
SI 32768  
SF 499.7727577 MHz  
WDW EM  
SSB 0  
LB 0.30 Hz  
GB 0  
PC 1.00

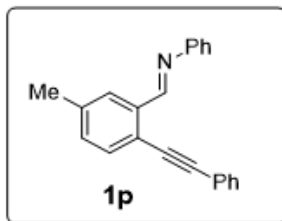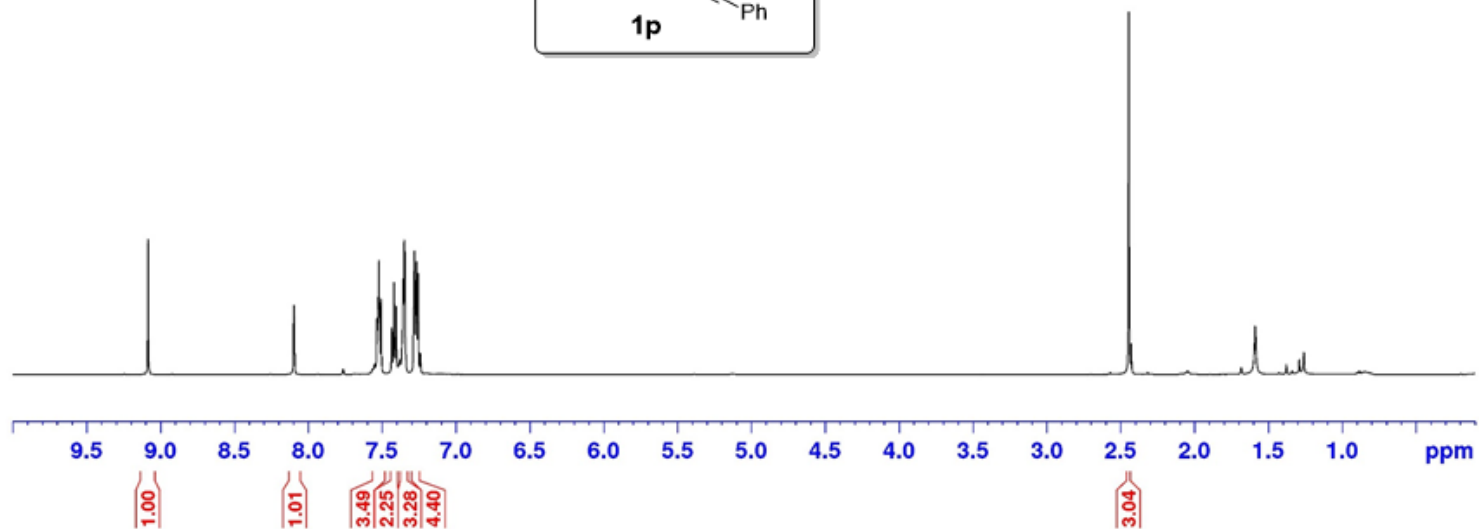

Solvent: CDCl<sub>3</sub>  
SFO1: 125 MHz

SDT-03-162-HPLC

159.14  
152.15  
139.00  
136.40  
132.60  
131.94  
131.49  
129.21  
128.54  
128.42  
126.87  
126.08  
122.95  
122.30  
121.04  
94.70  
86.40  
77.25  
77.00  
76.75  
21.45

Current Data Parameters  
NAME SDT-03-165-HPLC-9-13C.fid  
EXPNO 1  
PROCNO 1  
F2 - Processing parameters  
SI 45536  
SF 125.6679609 MHz  
WDW EM  
SSB 0  
LB 0.30 Hz  
GB 0  
PC 1.00

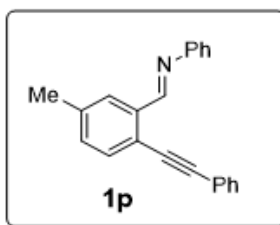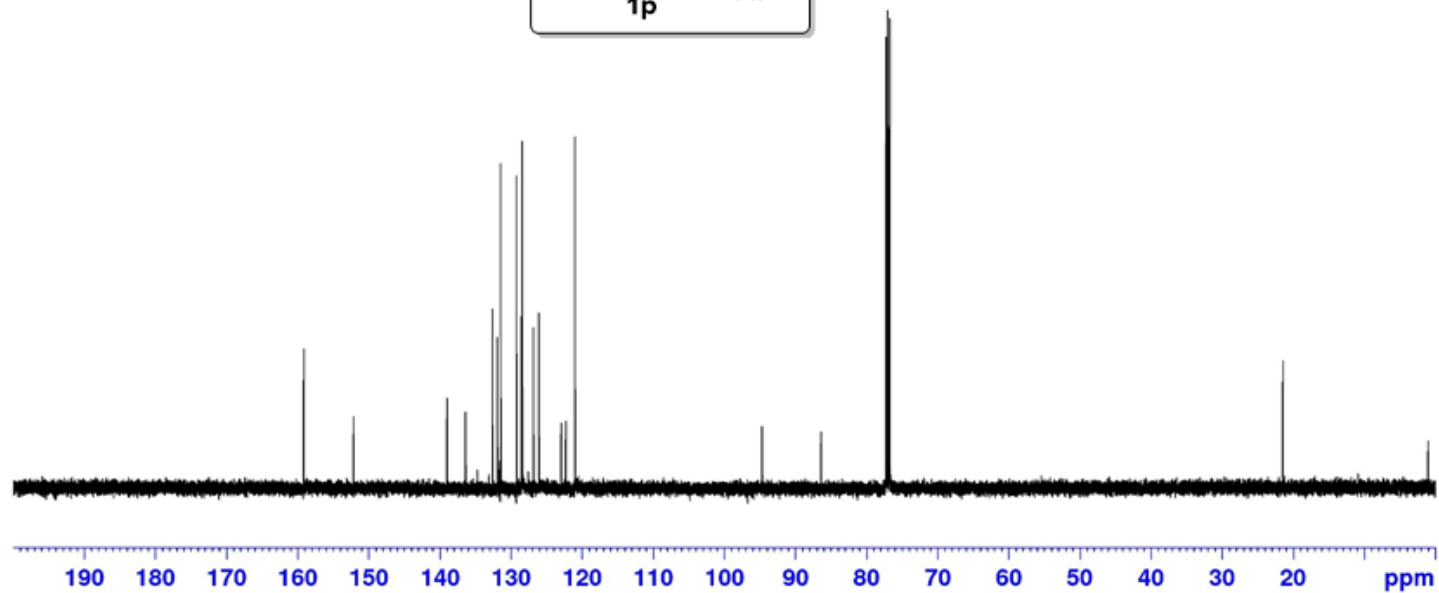



Solvent: CDCl<sub>3</sub>  
SFO1: 400 MHz

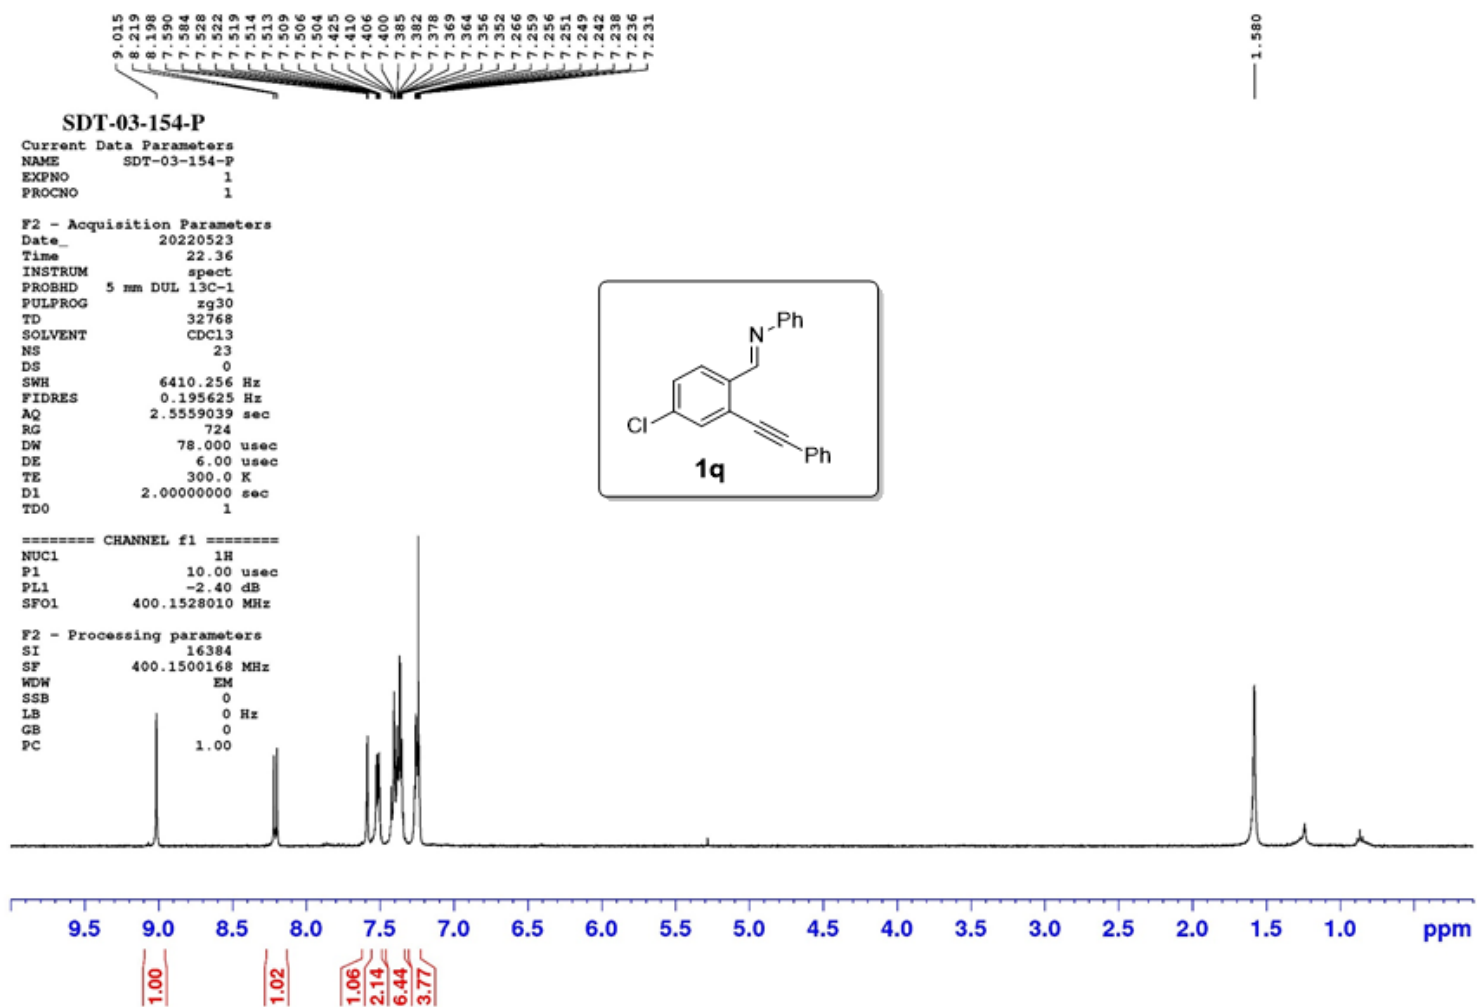

Solvent: CDCl<sub>3</sub>  
SFO1: 100 MHz

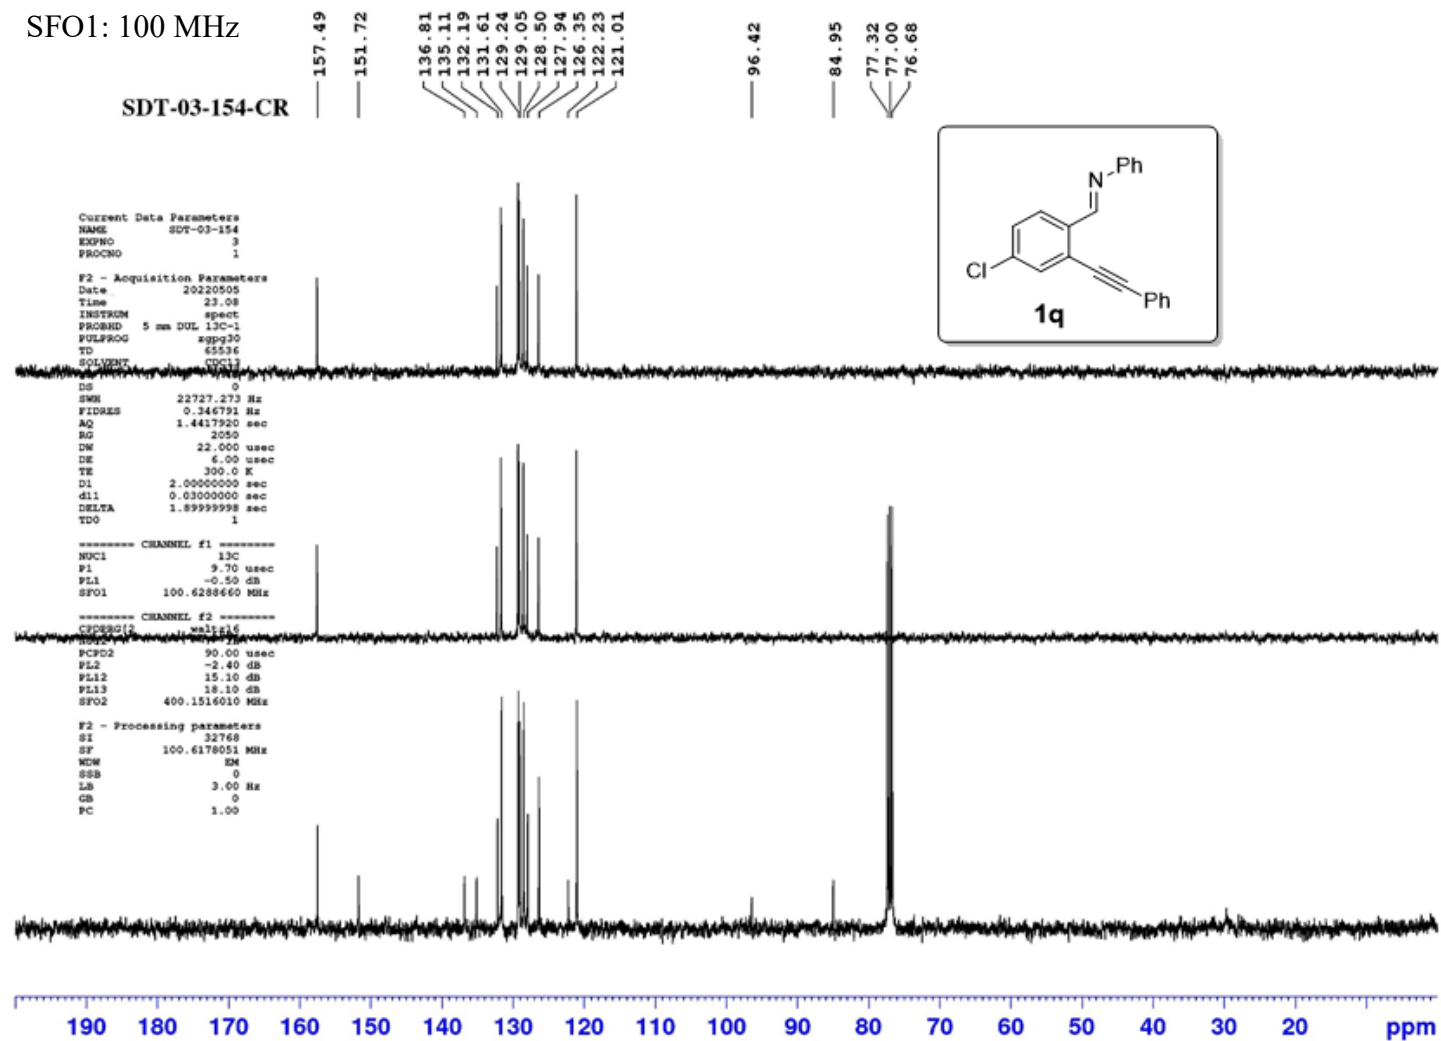

Solvent: CDCl<sub>3</sub>  
SFO1: 500 MHz

Imine 1S-Pure

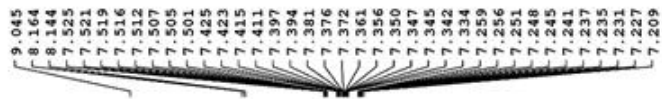

2.337

1.598

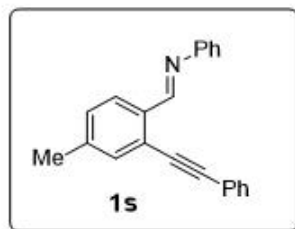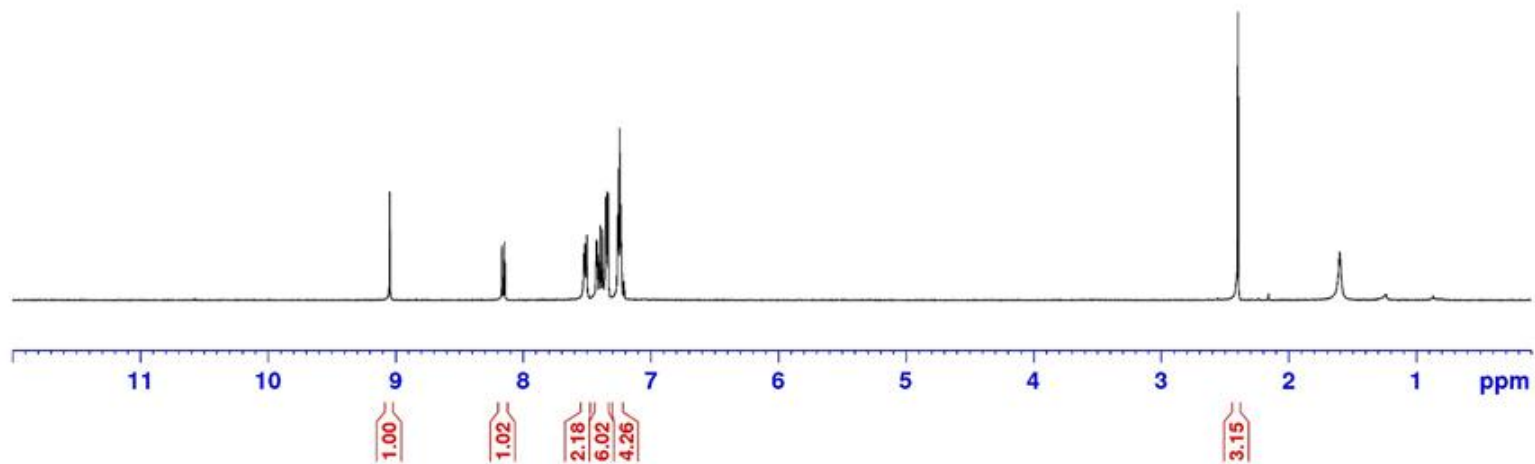

Solvent: CDCl<sub>3</sub>  
SFO1: 100 MHz

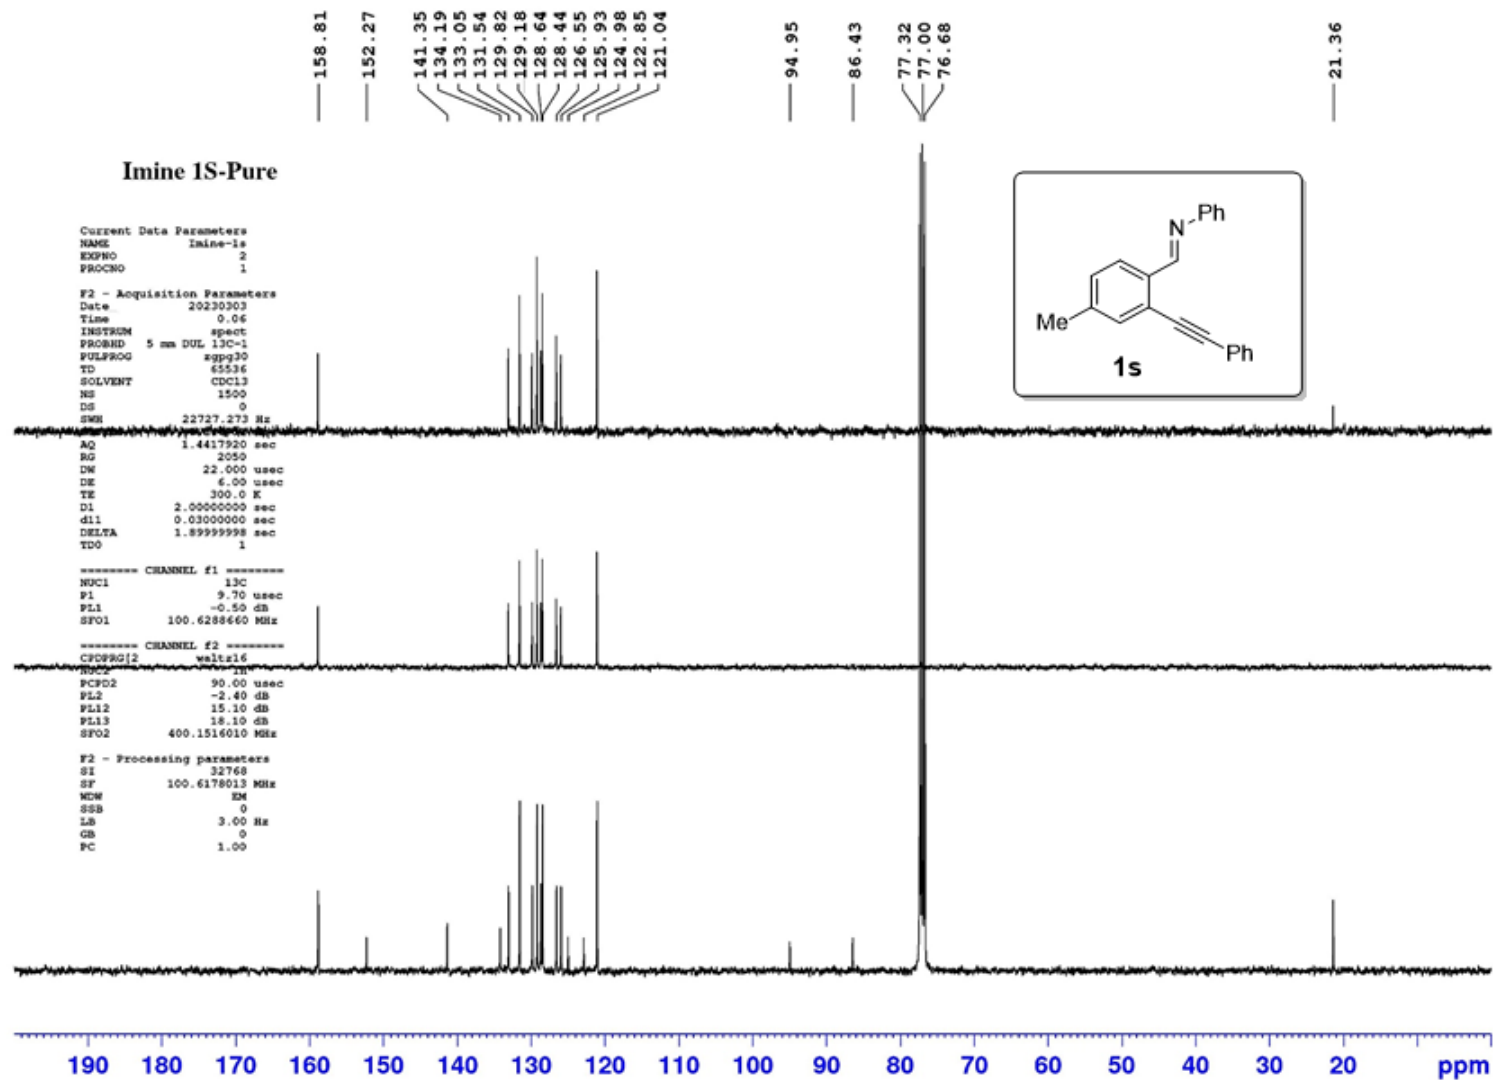

Solvent: CDCl<sub>3</sub>  
SFO1: 500 MHz

7.748  
7.734  
7.539  
7.524  
7.509  
7.444  
7.429  
7.414  
7.240

5.881

1.594

**SDT-04-35-P**  
Current Data Parameters  
NAME SDT-04-35-P-1H.fid  
EXPNO 1  
PROCNO 1  
F2 - Processing parameters  
SI 32768  
SF 499.7727655 MHz  
WDW EM  
SSB 0  
LB 0.30 Hz  
GB 0  
PC 1.00

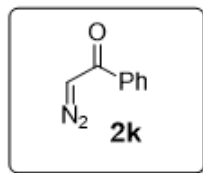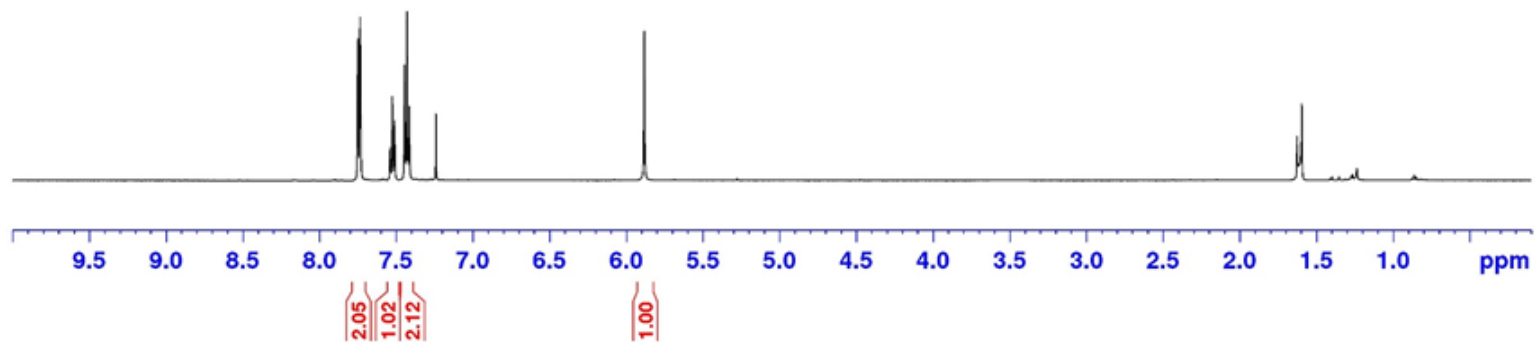

Solvent: CDCl<sub>3</sub>  
SFO1: 100 MHz

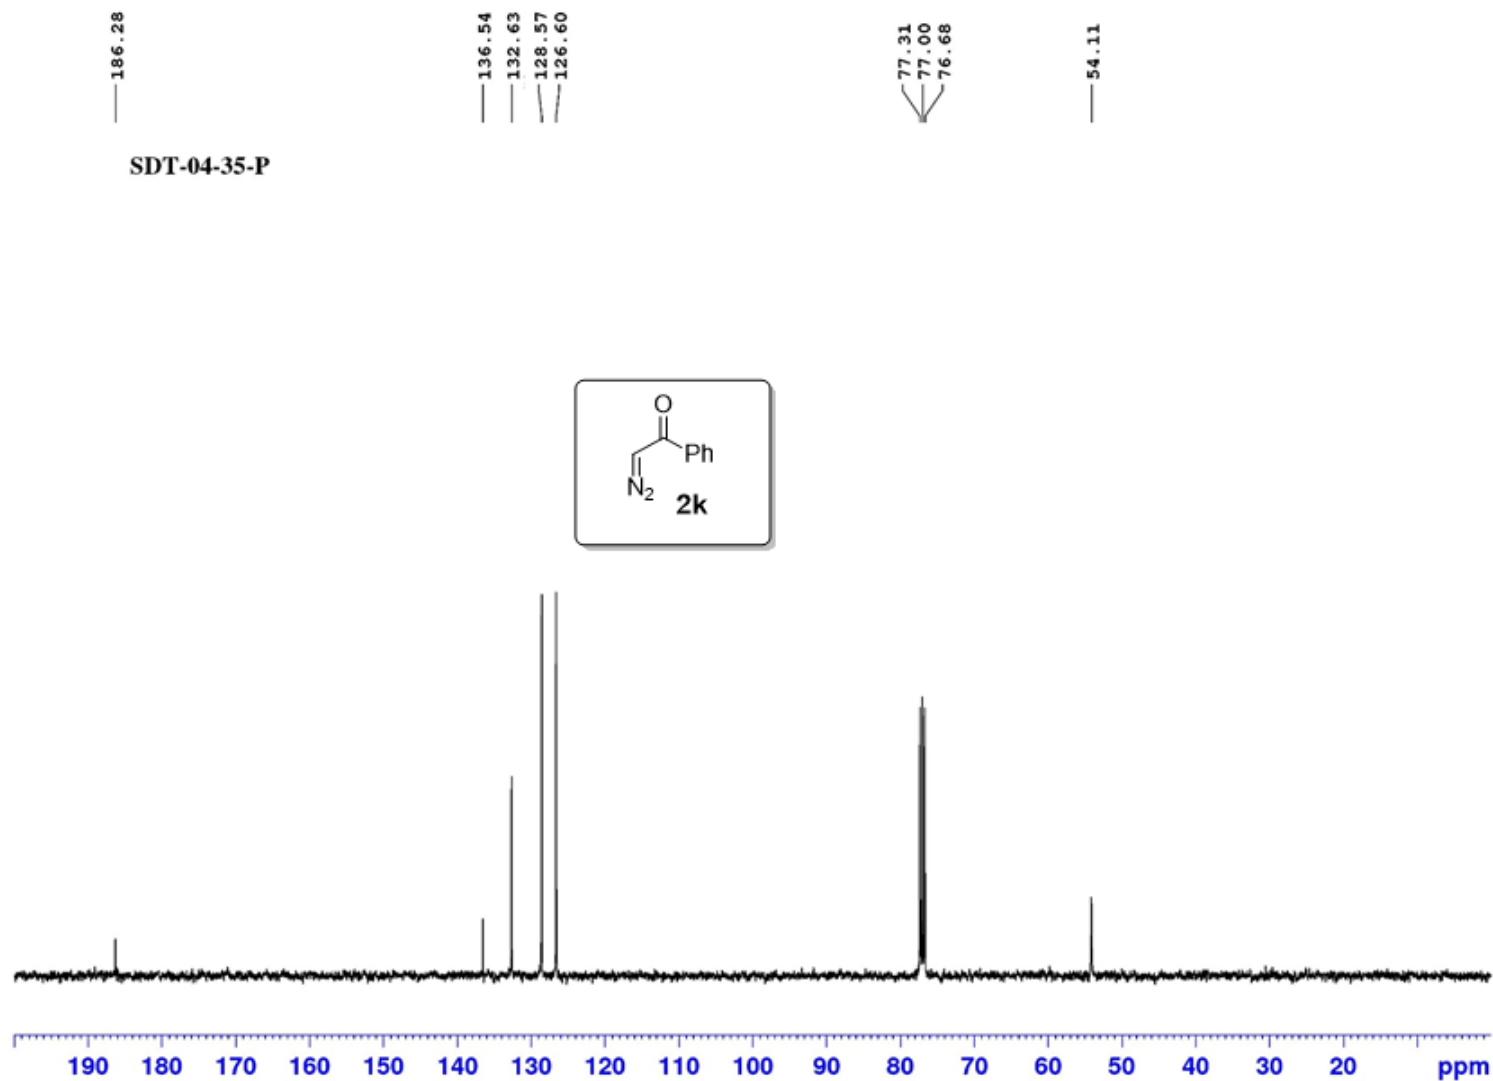

Solvent: CDCl<sub>3</sub>  
SFO1: 500 MHz

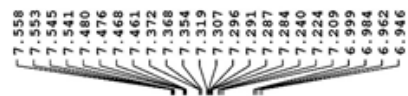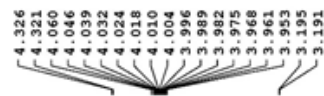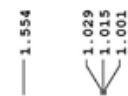

SDt-03-179-AP-C

Current Data Parameters  
NAME SDT-03-179-AP-C-Int  
EXPNO 1  
PROCNO 1

F2 - Processing parameters  
SI 32768  
SF 499.7727705 MHz  
WDW EM  
SSB 0  
LB 0.30 Hz  
GB 0  
PC 1.00

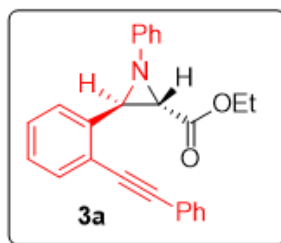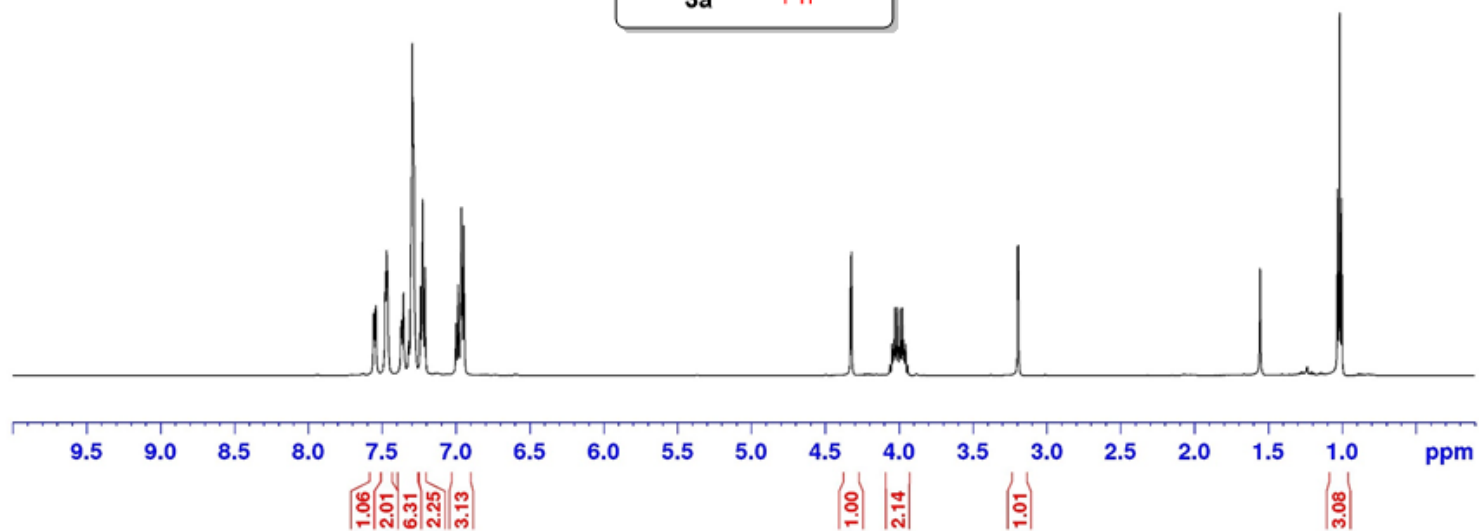

Solvent: CDCl<sub>3</sub>  
SFO1: 175 MHz

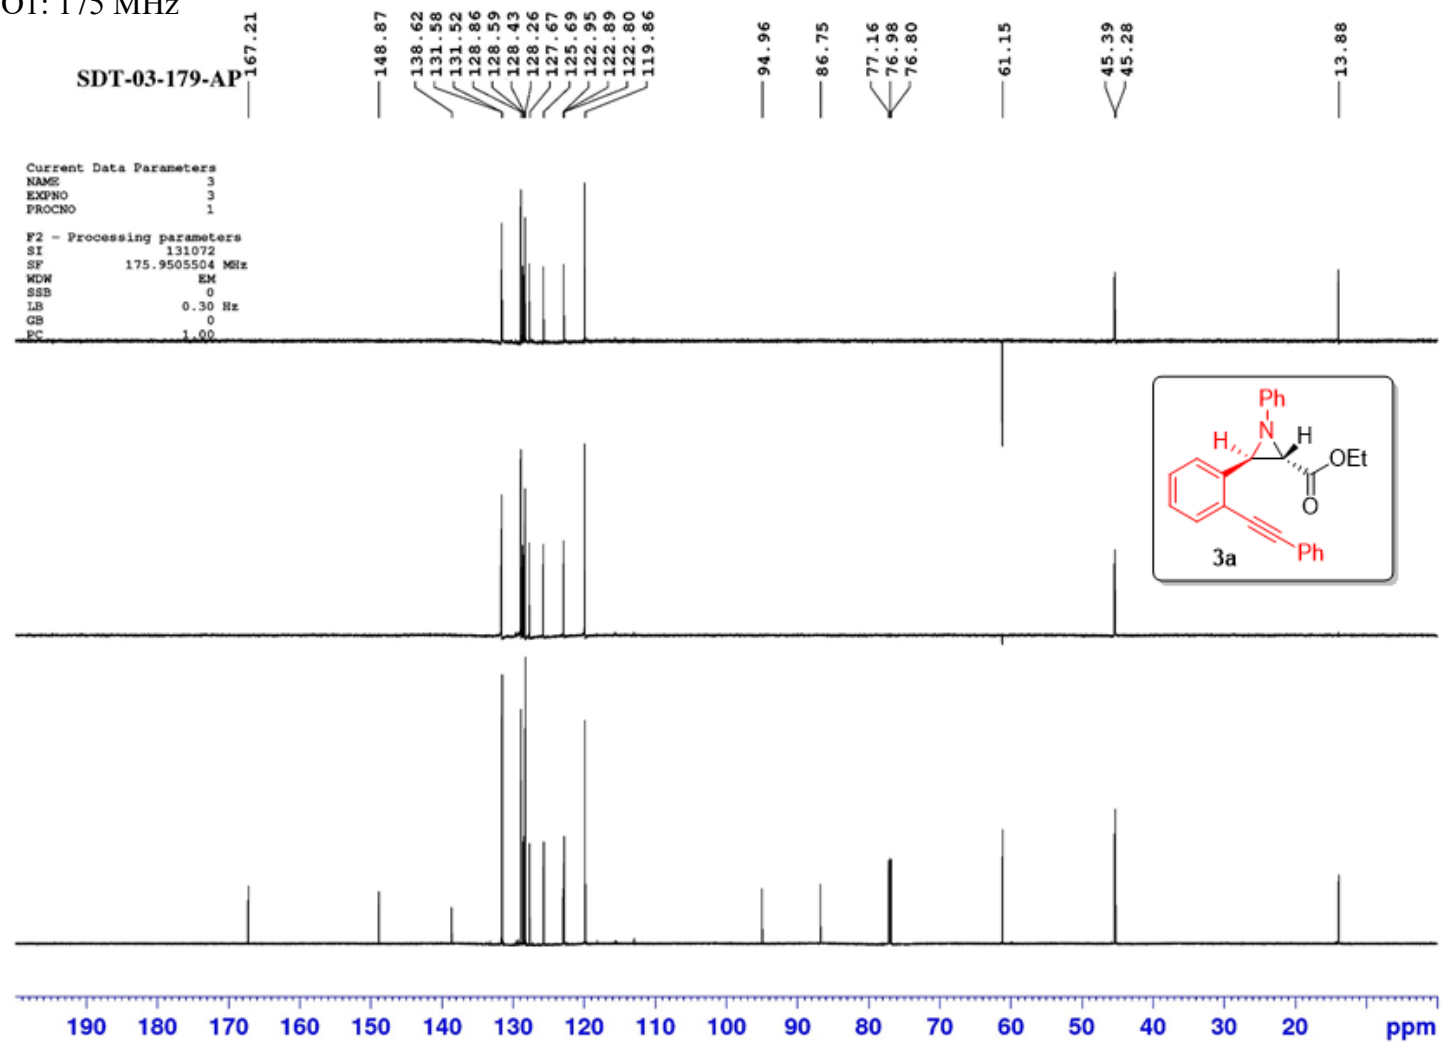



Solvent: CDCl<sub>3</sub>  
SFO1: 700 MHz

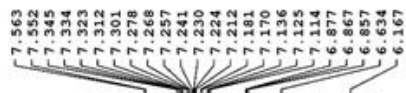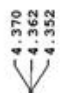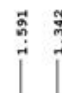

SDT-03-205-AP-B

Current Data Parameters  
NAME SDT-03-205-AP-B-H.f  
EXPNO 1  
PROCNO 1

F2 - Processing parameters  
SI 65536  
SF 699.7431022 MHz  
WDW EM  
SSB 0  
LB 0.30 Hz  
GB 0  
PC 1.00

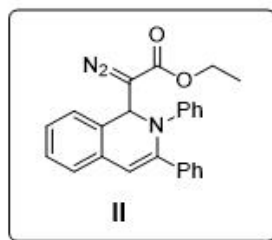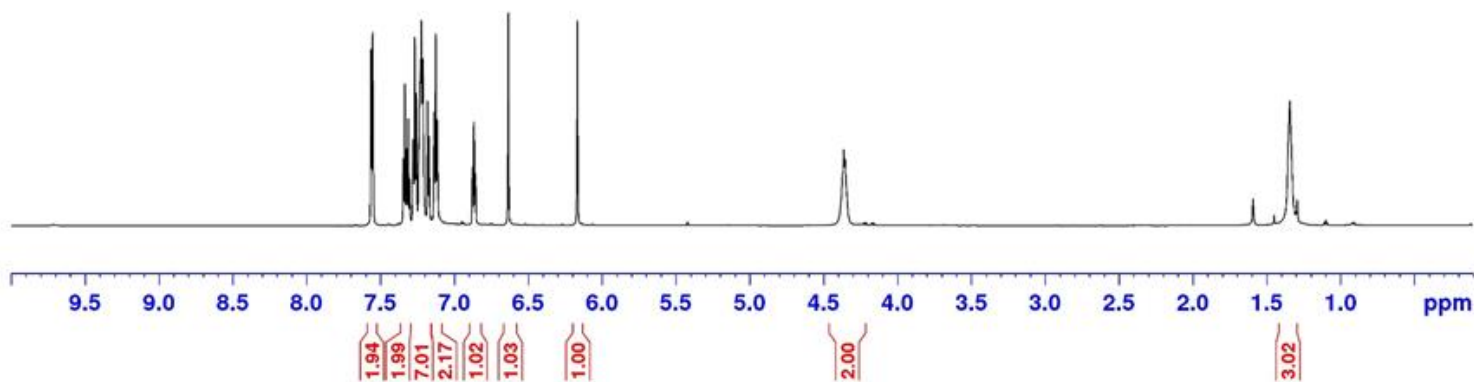

Solvent: CDCl<sub>3</sub>  
SFO1: 175 MHz

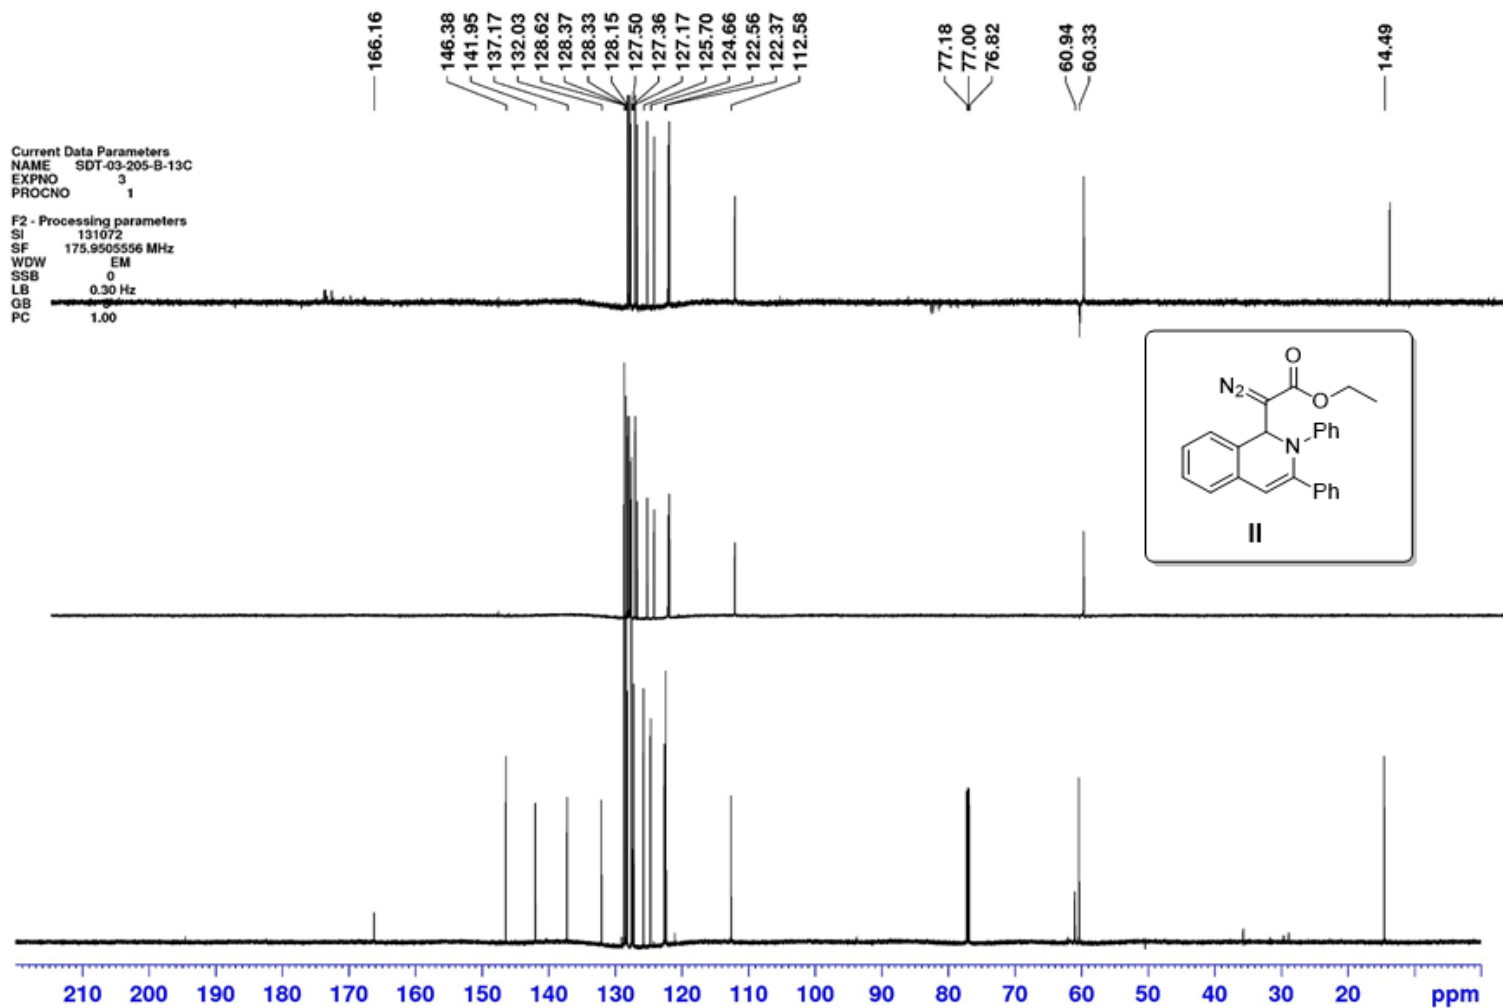

Solvent: CDCl<sub>3</sub>  
SFO1: 700 MHz

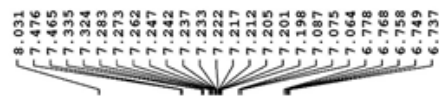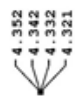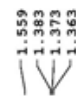

SDT-03-211-AP

Current Data Parameters  
NAME SDT-03-211-AP-H.fid  
EXPNO 1  
PROCNO 1

F2 - Processing parameters  
SI 65536  
SF 699.7431036 MHz  
WDW EM  
SSB 0  
LB 0.30 Hz  
GB 0  
PC 1.00

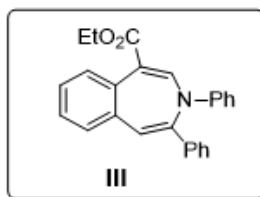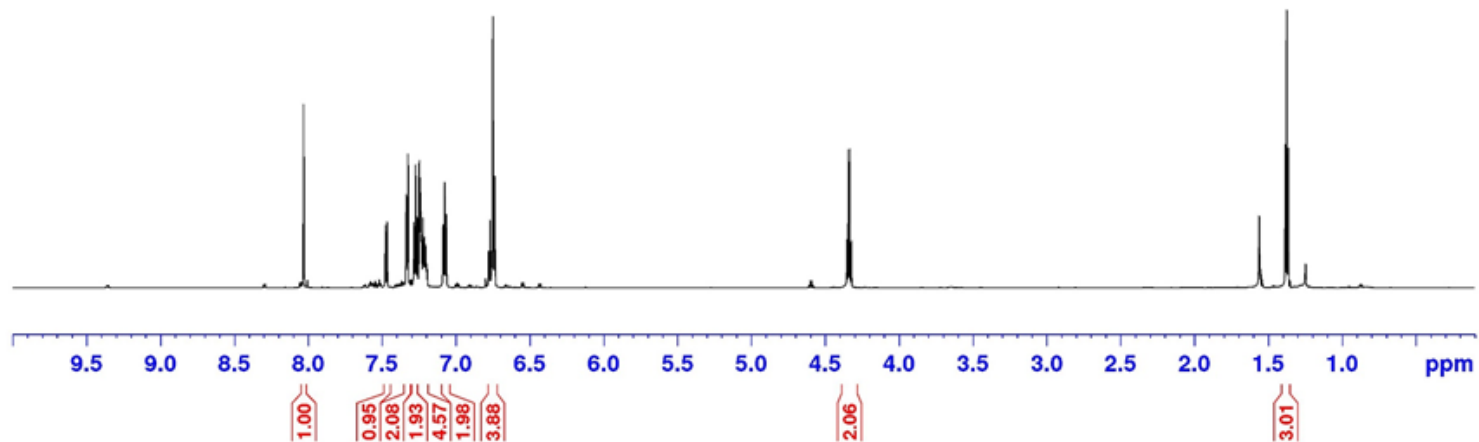

Solvent: CDCl<sub>3</sub>  
SFO1: 175 MHz

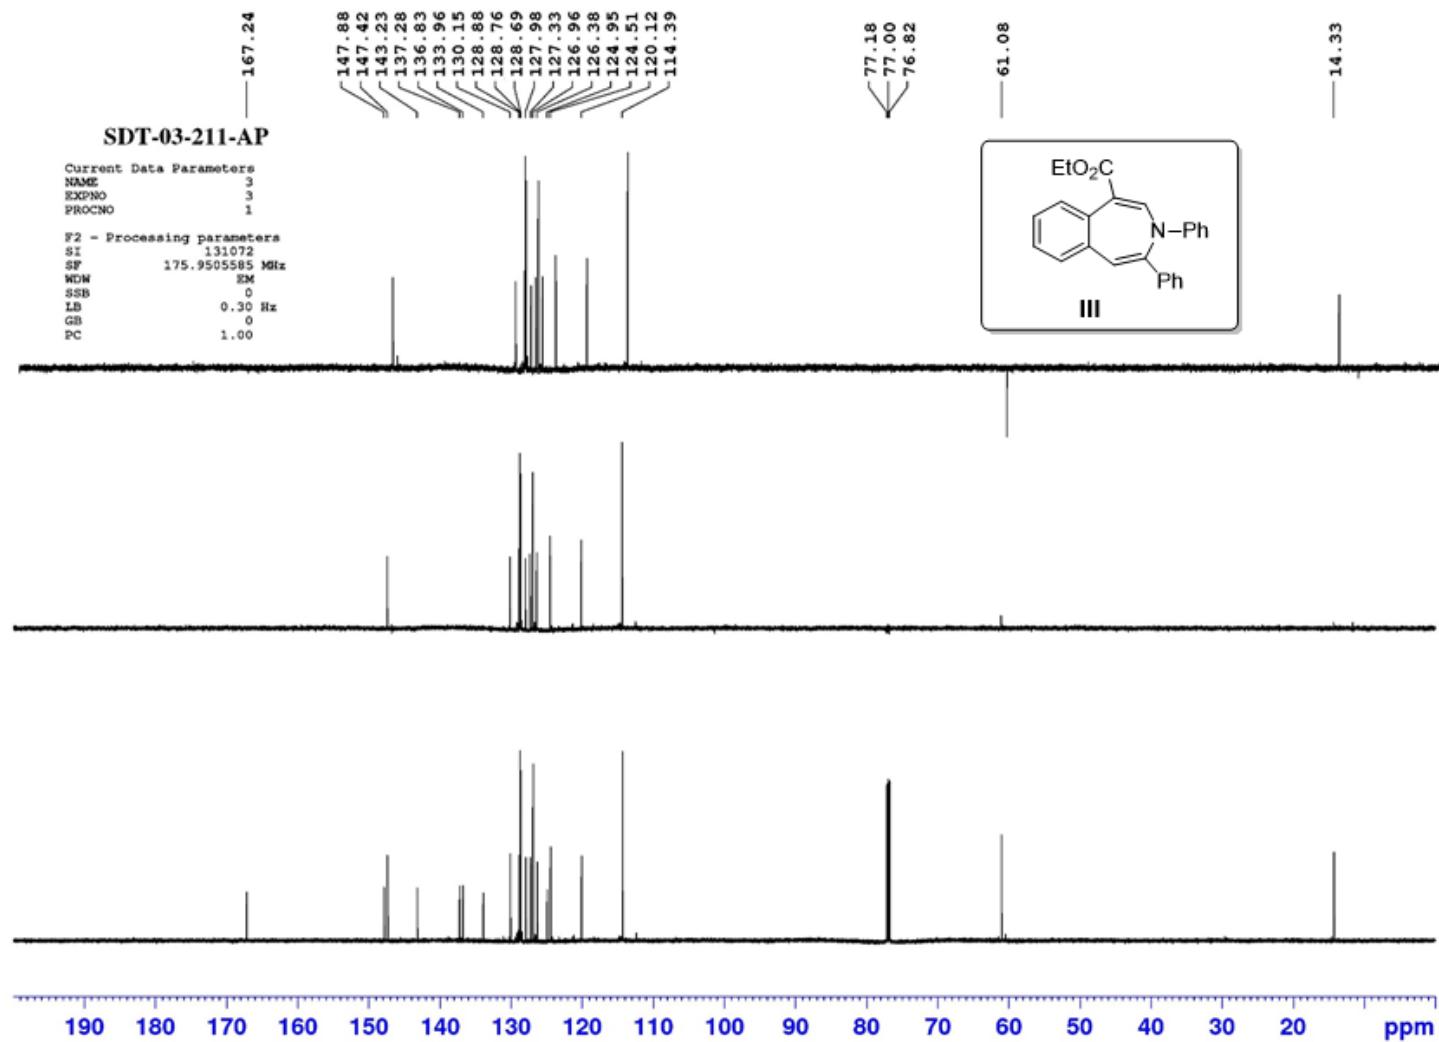

Solvent: CDCl<sub>3</sub>  
SFO1: 700 MHz

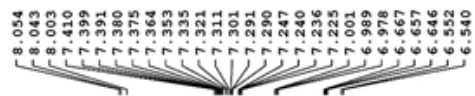

**SDT-03-89-AP**

Current Data Parameters  
NAME SDT-03-89-AP-H.fid  
EXPNO 1  
PROCNO 1

F2 - Processing parameters  
SI 65536  
SF 699.7431009 MHz  
WDW EM  
SSB 0  
LB 0.30 Hz  
GB 0  
PC 1.00

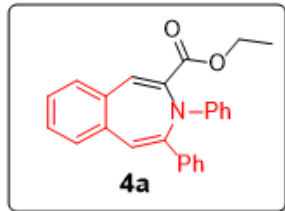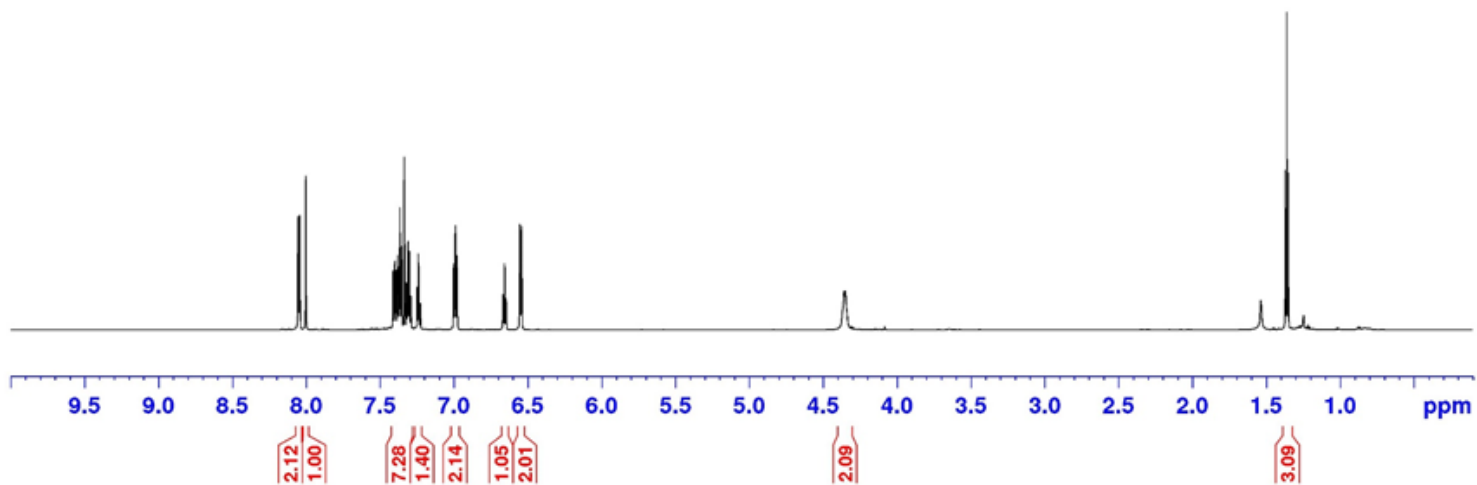

Solvent: CDCl<sub>3</sub>  
SFO1: 175 MHz

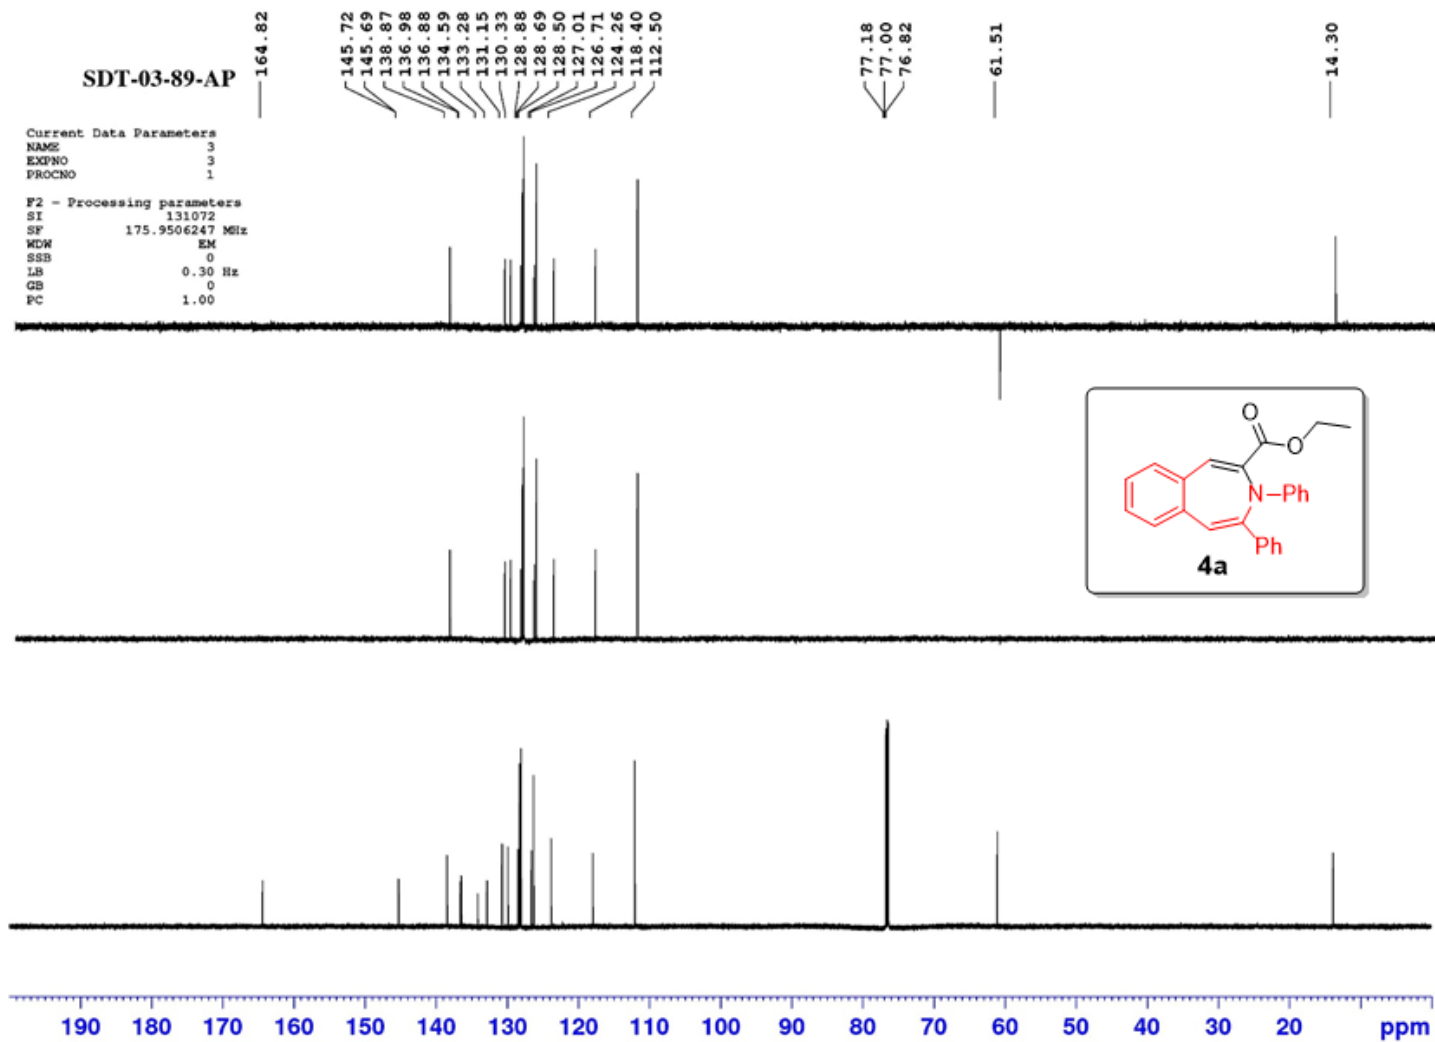

Solvent: CDCl<sub>3</sub>  
SFO1: 700 MHz

8.028  
8.023  
8.017  
7.426  
7.415  
7.408  
7.397  
7.389  
7.379  
7.368  
7.357  
7.338  
7.328  
7.317  
7.273  
7.262  
7.251  
7.240  
6.942  
6.929  
6.478  
6.465

4.356

1.565  
1.377  
1.367  
1.356

SDT-03-90-2

Current Data Parameters  
NAME SDT-03-90-2-AP-H.fi  
EXPNO 1  
PROCNO 1

F2 - Processing parameters  
SI 65536  
SF 699.7431022 MHz  
WDW EM  
SSB 0  
LB 0.30 Hz  
GB 0  
PC 1.00

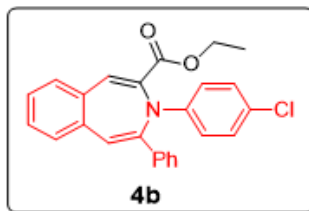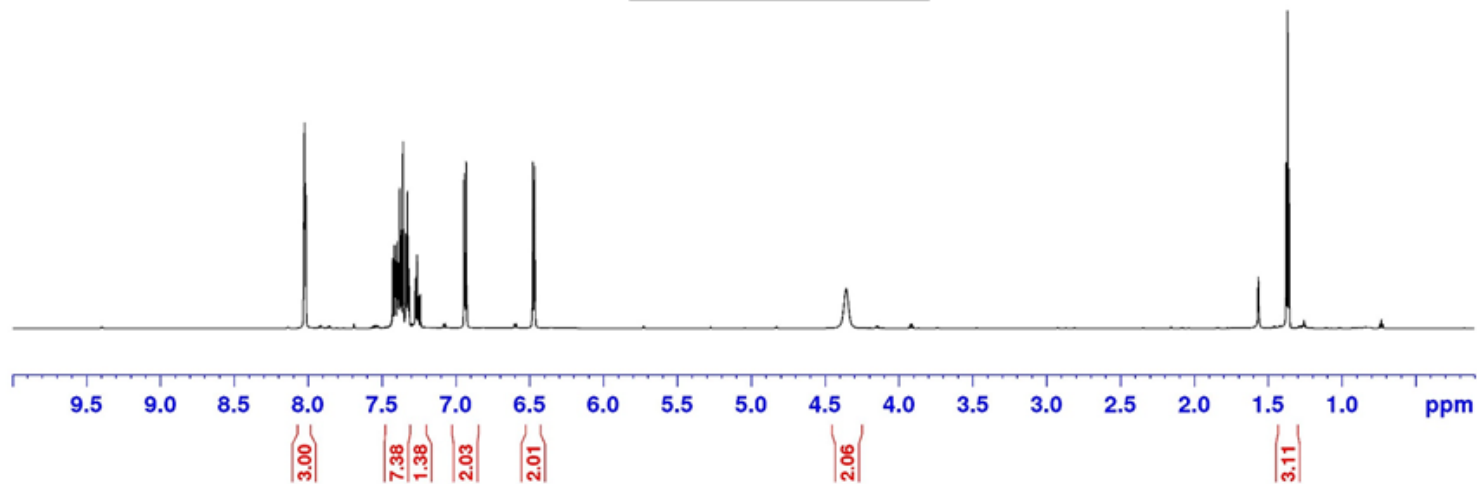

Solvent: CDCl<sub>3</sub>  
SFO1: 175 MHz

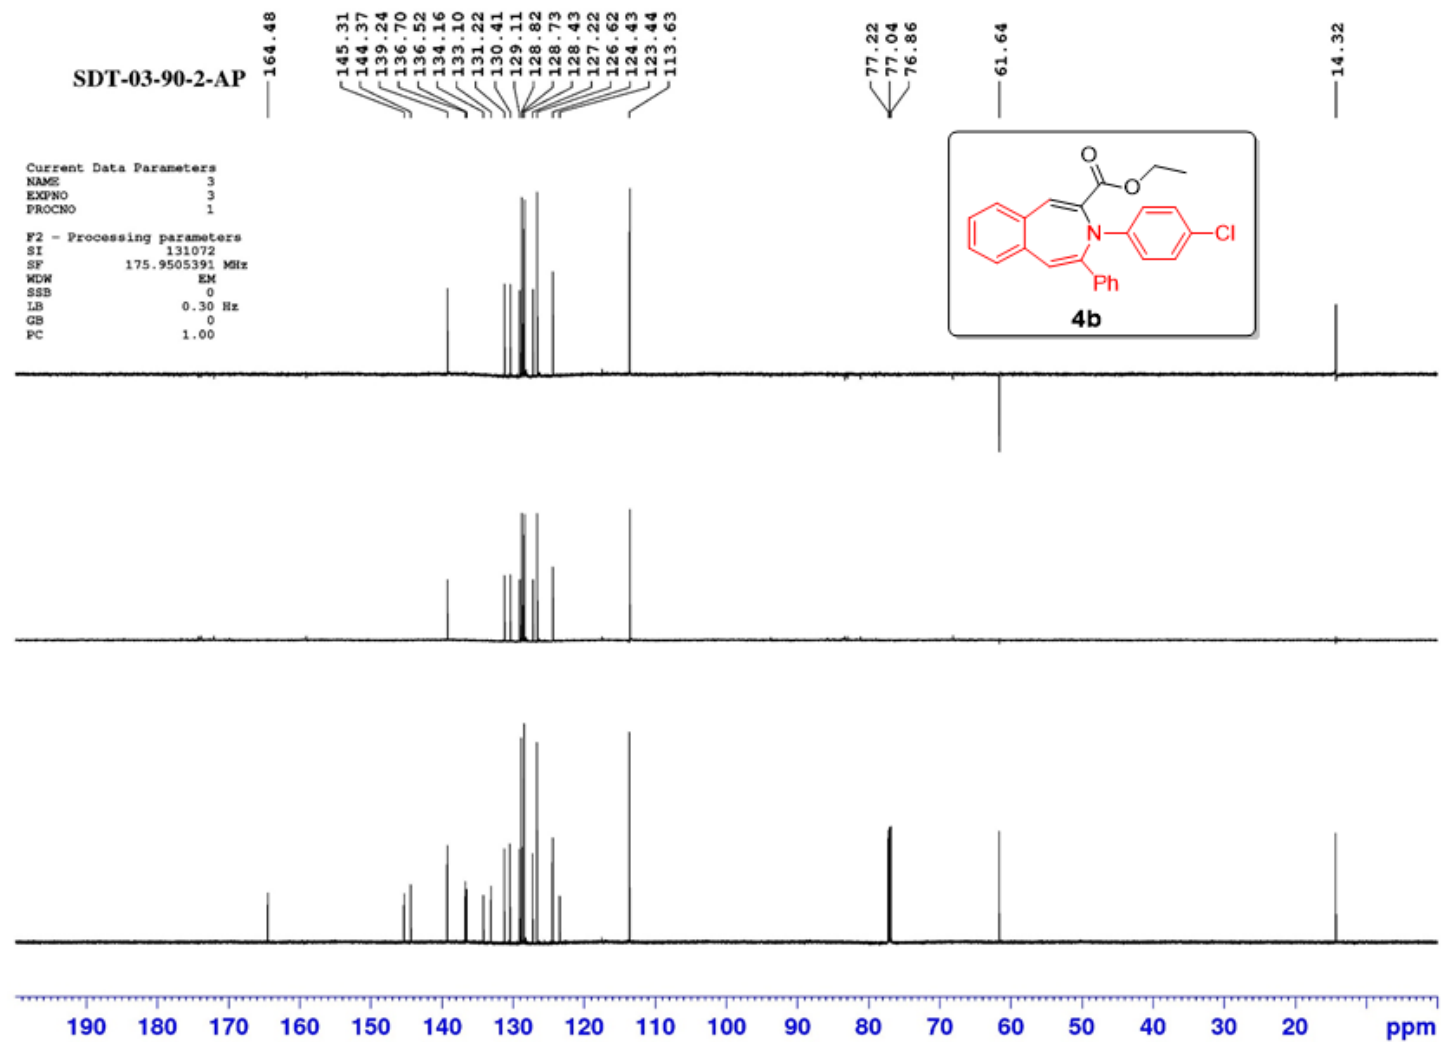



Solvent: CDCl<sub>3</sub>  
SFO1: 700 MHz

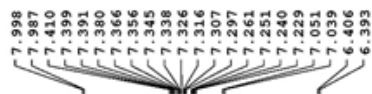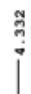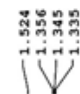

**SDT-03-100-AP-r**

Current Data Parameters  
NAME SDT-03-100-AP-r-H.f  
EXPNO 1  
PROCNO 1

F2 - Processing parameters  
SI 65536  
SF 699.7431058 MHz  
WDW EM  
SSB 0  
LB 0.30 Hz  
GB 0  
PC 1.00

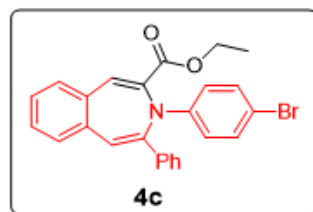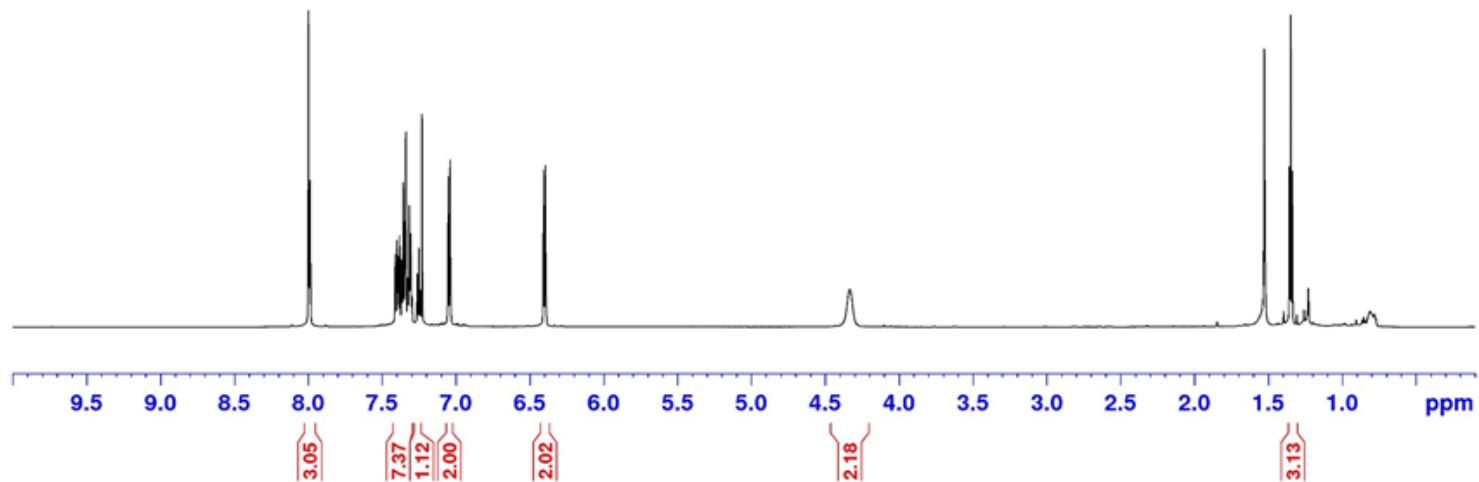

Solvent: CDCl<sub>3</sub>  
SFO1: 175 MHz

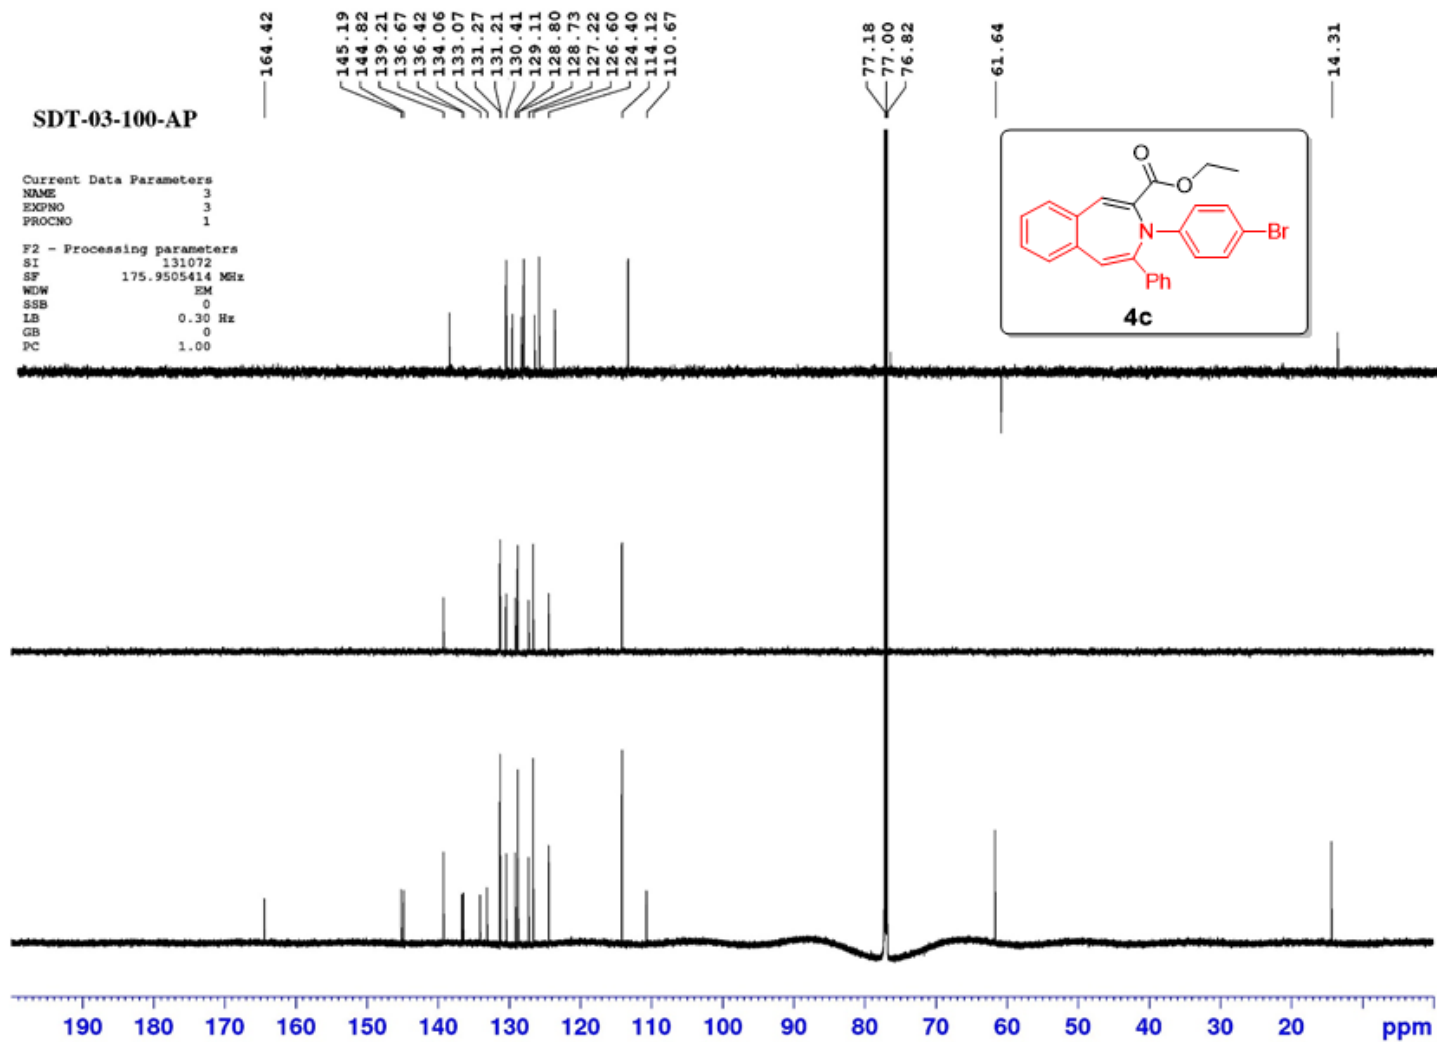

Solvent: CDCl<sub>3</sub>  
SFO1: 700 MHz

8.041  
8.030  
8.011  
7.417  
7.406  
7.398  
7.388  
7.377  
7.366  
7.329  
7.324  
7.319  
7.313  
7.308  
7.264  
7.253  
7.240  
6.705  
6.693  
6.680  
6.480  
6.473  
6.470  
6.466  
6.460

4.372  
4.362  
4.352  
4.342

1.550  
1.378  
1.368  
1.358

SDT-03-69-AP

Current Data Parameters  
NAME SDT-03-109-AP-H.fid  
EXPNO 1  
PROCNO 1

F2 - Processing parameters  
SI 65536  
SF 699.7431026 MHz  
WDW EM  
SSB 0  
LB 0.30 Hz  
GB 0  
PC 1.00

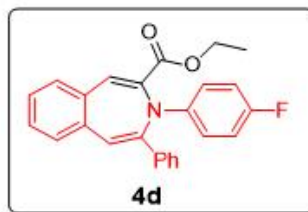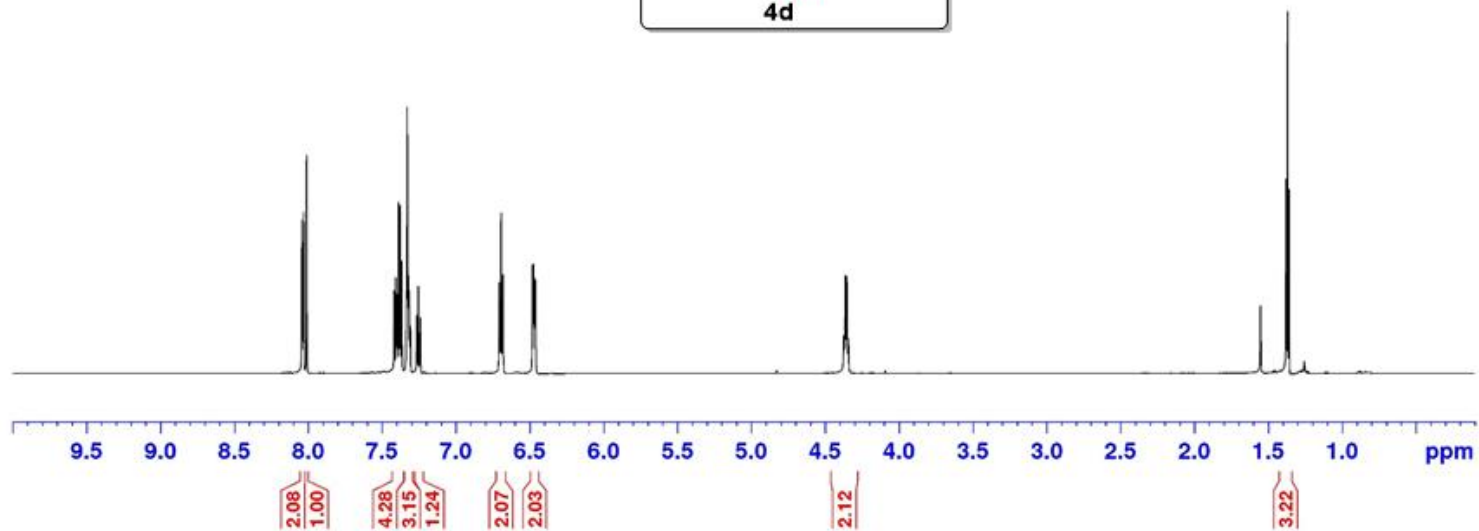

Solvent: CDCl<sub>3</sub>  
SFO1: 175 MHz

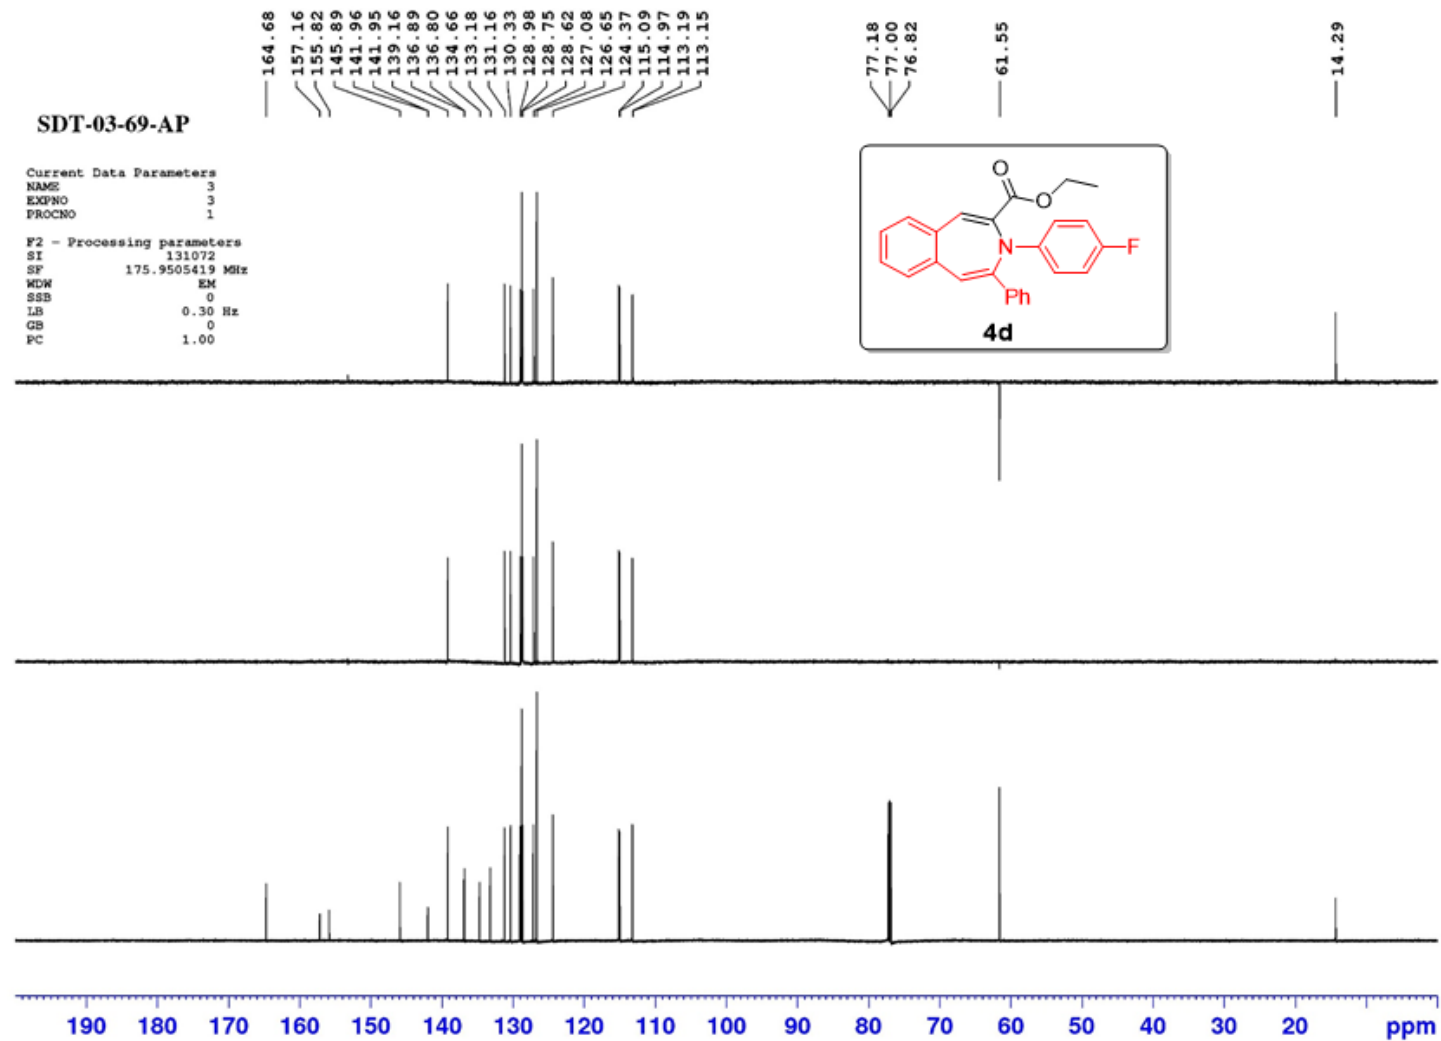

Solvent: CDCl<sub>3</sub>  
SFO1: 500 MHz

YT-03-10g-A-P

```
Current Data Parameters
ME      110u220322.001
PNO     2
OCNO    1

- Acquisition Parameters
te      20220322
tu      13.43 h
ISTRIM  spect
IQBMND  Z119470 0234 (
ILPROG  zgpg30
)       131072
SOLVENT CDCl3
       120
       4
F1      163043.484 Hz
F2      1.243923 Hz
SFO1    0.4019541 sec
       191.01
W       3.067 usec
E       6.50 usec
K       299.5 K
I       1.00000000 sec
II      0.03000000 sec
I2      0.00002000 sec
DO      1
FO1     470.5735434 MHz
FDC1    19F
       15.00 usec
FMI     48.50000000 W
FPC2    500.1620006 MHz
FUC2    1H
:PDPPG12  waltz16
XPCD2   80.00 usec
FLW2    29.50000000 W
FLM12   0.46094000 W

F2 - Processing parameters
F1      65536
SF      470.6206054 MHz
WDW     EM
SSB     0
LB      3.00 Hz
GB      0
PC      1.00
```

---127.163

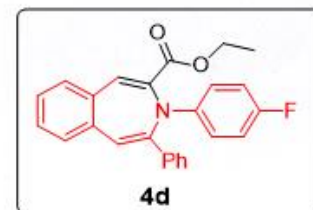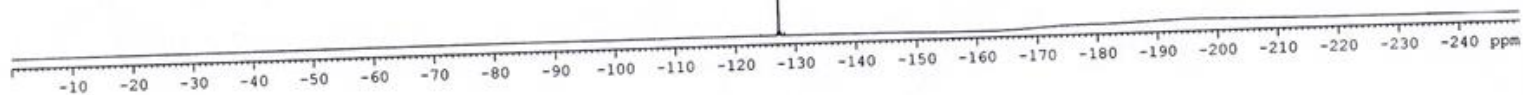

Solvent: CDCl<sub>3</sub>  
SFO1: 700 MHz

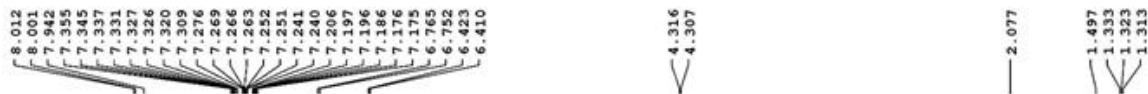

SDT-03-103-AP

Current Data Parameters  
NAME SDT-03-103-AP-H.fid  
EXPNO 1  
PROCNO 1

F2 - Processing parameters  
SI 65536  
SF 699.7431240 MHz  
WDW EM  
SSB 0  
LB 0.30 Hz  
GB 0  
PC 1.00

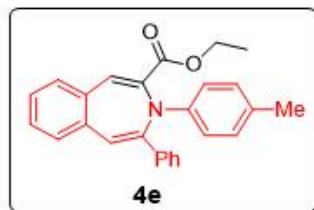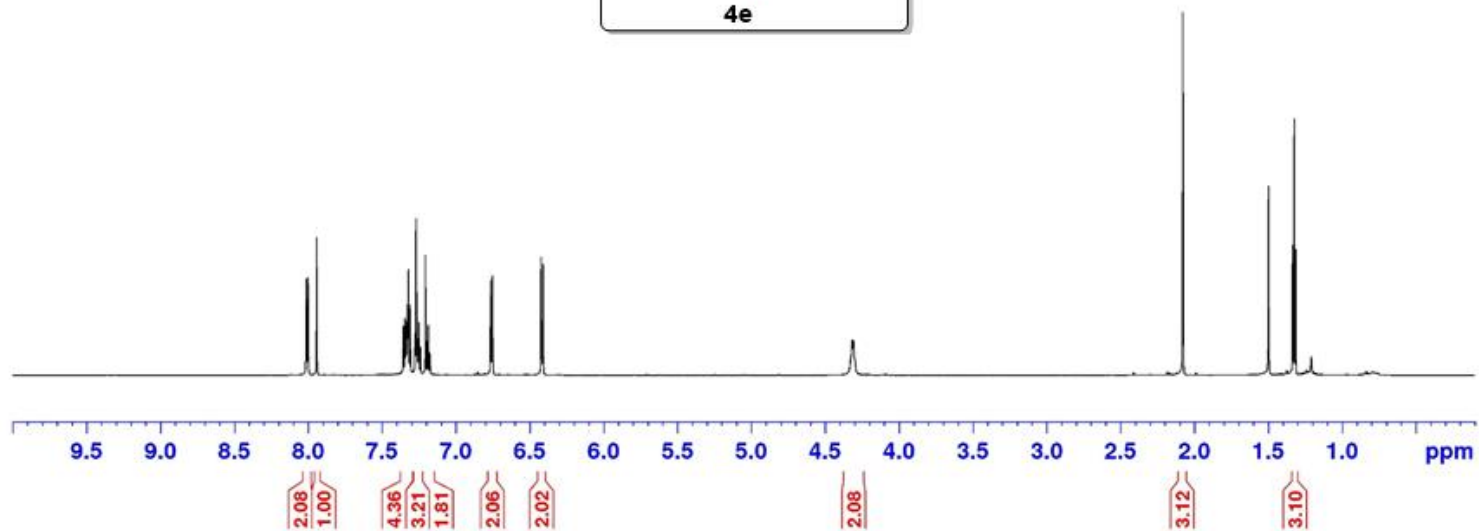

Solvent: CDCl<sub>3</sub>  
SFO1: 175 MHz

SDT-03-103-AP

Current Data Parameters  
NAME 3  
EXPNO 3  
PROCNO 1  
F2 - Processing parameters  
SI 131072  
SF 175.9506435 MHz  
WDW EM  
SSB 0  
LB 0.30 Hz  
GB 0  
PC 1.00

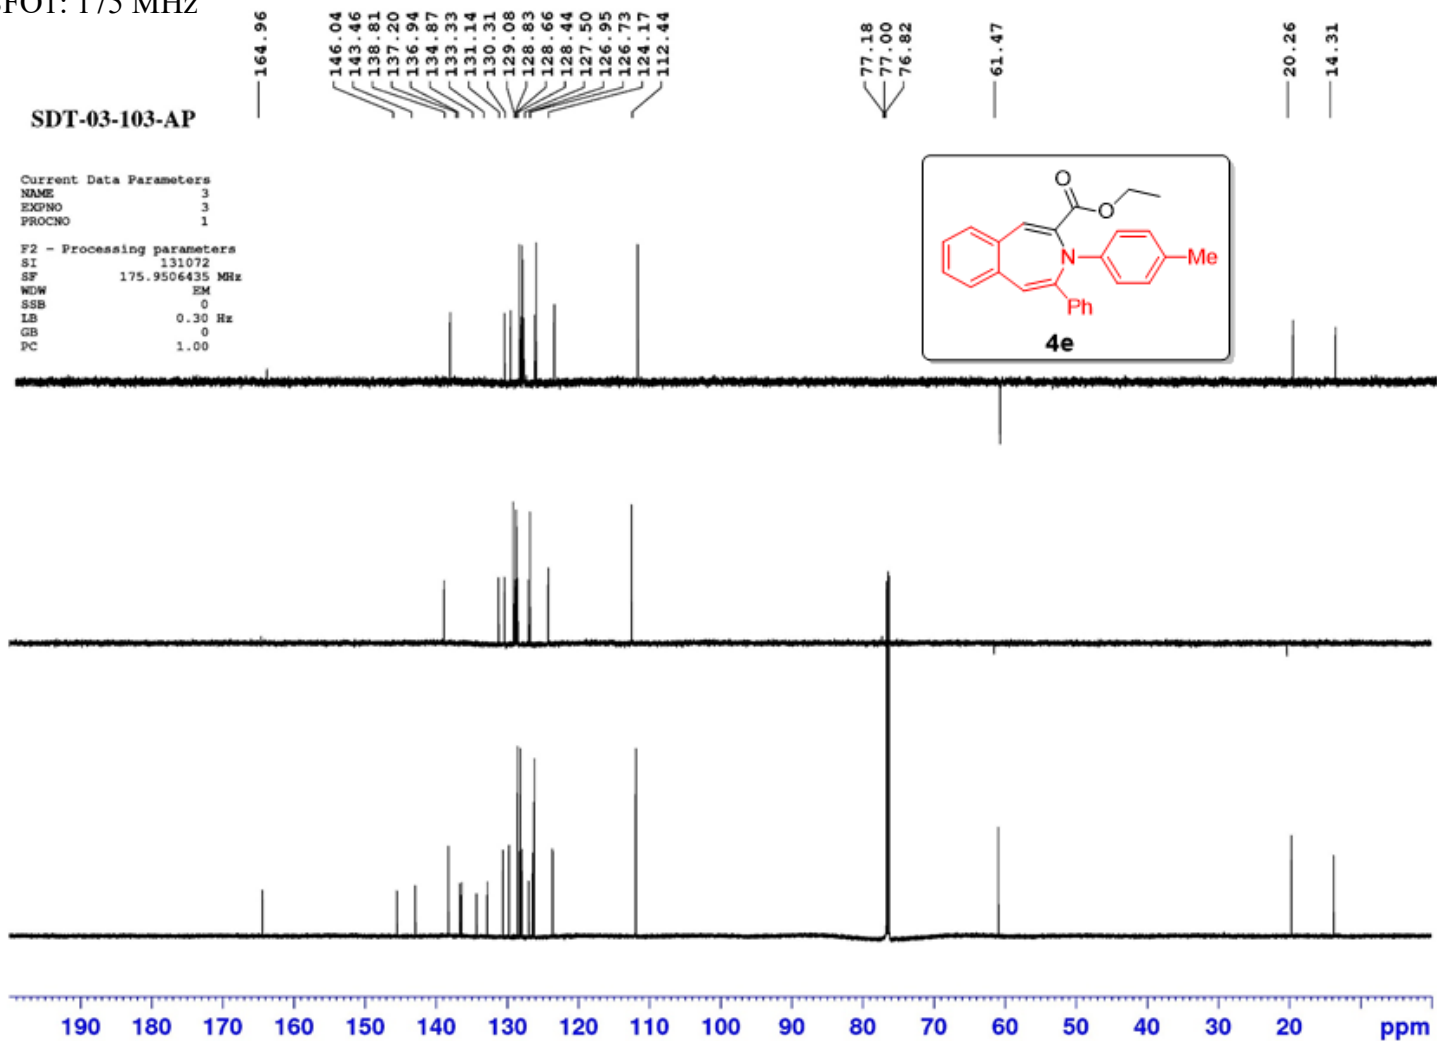

Solvent: CDCl<sub>3</sub>  
SFO1: 500 MHz

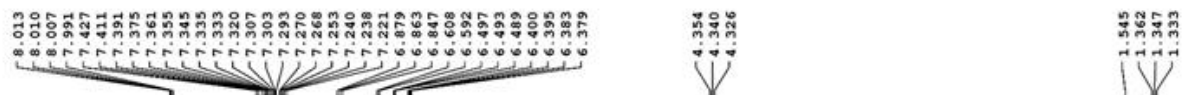

SDT-03-112-AP

Current Data Parameters  
NAME SDT-03-112-Final-AP  
EXPNO 1  
PROCNO 1

F2 - Processing parameters  
SI 32768  
SF 499.7727748 MHz  
WDW EM  
SSB 0  
LB 0.30 Hz  
GB 0  
PC 1.00

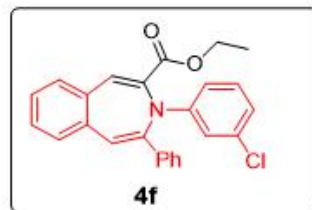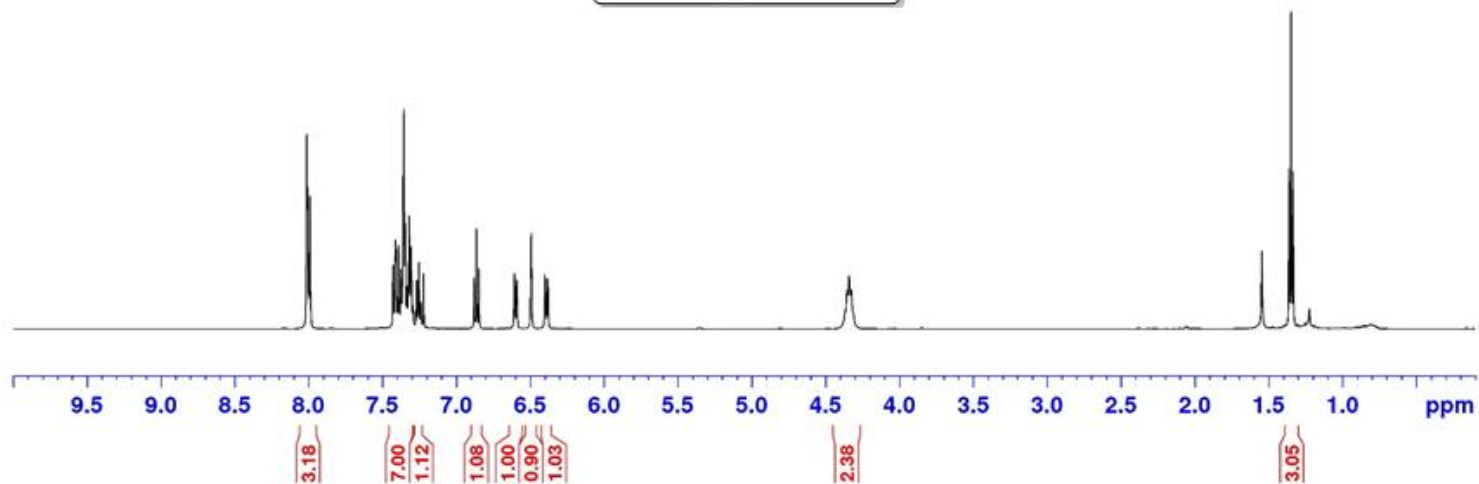



Solvent: CDCl<sub>3</sub>  
SFO1: 175 MHz

SDT-03-112-AP

Current Data Parameters  
NAME 3  
EXPNO 3  
PROCNO 1

F2 - Processing parameters  
SI 131072  
SF 175.9505404 MHz  
WDW EM  
SSB 0  
LB 0.30 Hz  
GB 0  
PC 1.00

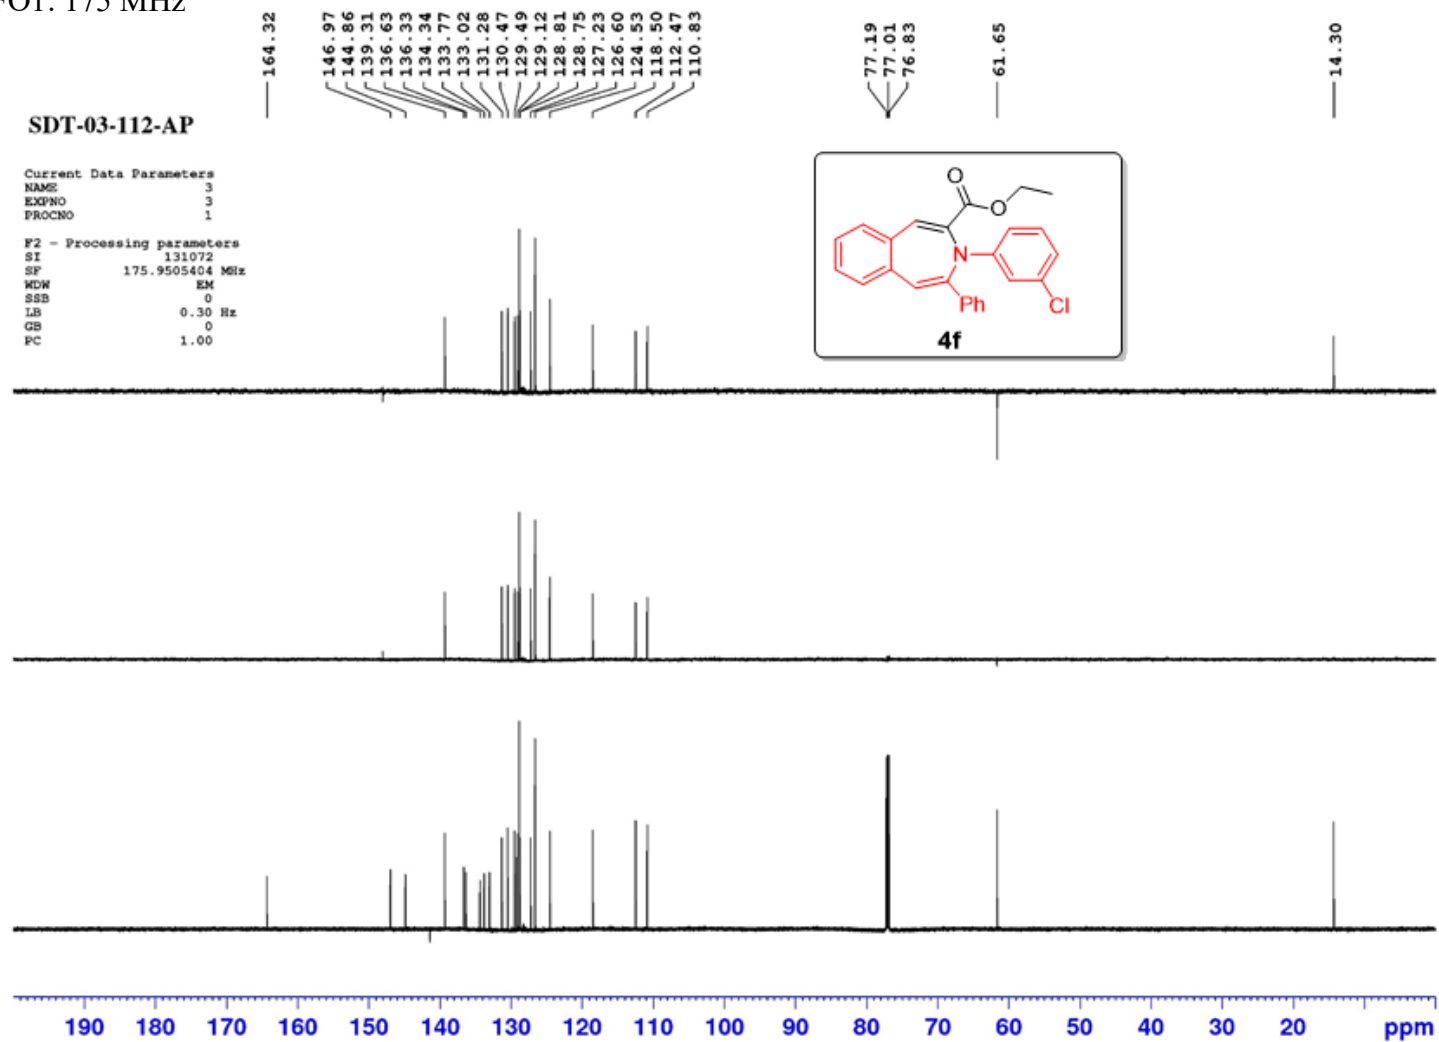

Solvent: CDCl<sub>3</sub>  
SFO1: 500 MHz

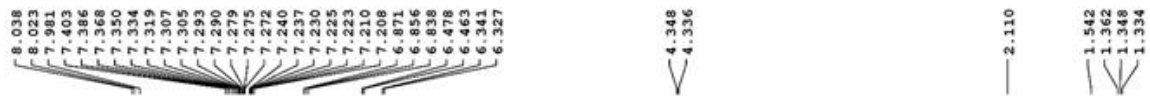

SDT-03-111-AP

Current Data Parameters  
NAME SDT-03-111-Final-AP  
EXPNO 1  
PROCNO 1

F2 - Processing parameters  
SI 32768  
SF 499.7727708 MHz  
WDW EM  
SSB 0  
LB 0.30 Hz  
GB 0  
PC 1.00

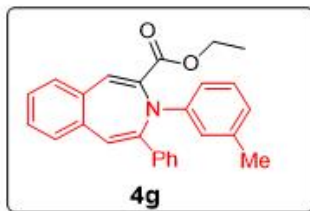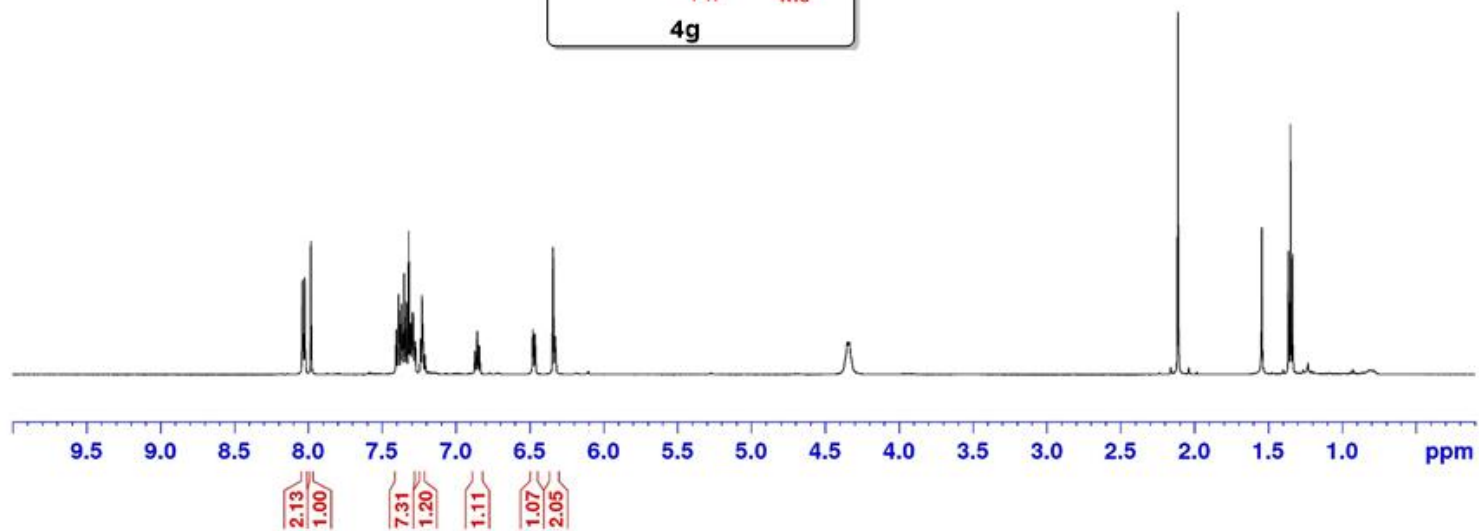

Solvent: CDCl<sub>3</sub>  
SFO1: 175 MHz

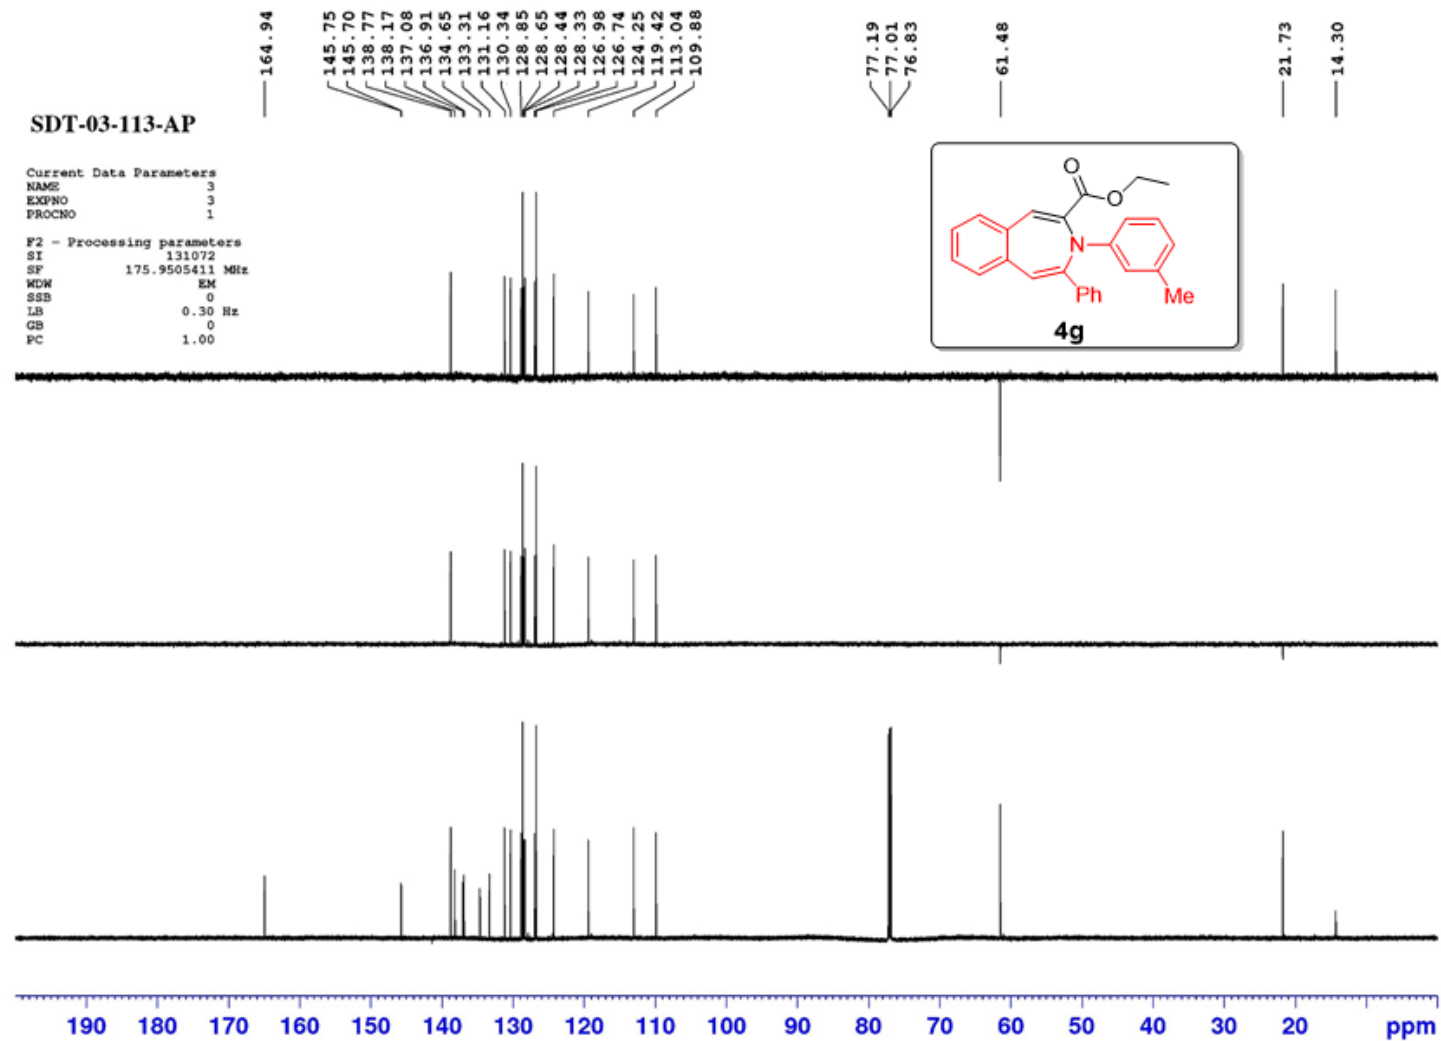

Solvent: CDCl<sub>3</sub>  
SFO1: 500 MHz

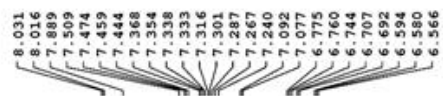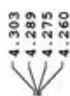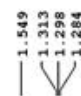

SDT-03-113-AP

Current Data Parameters  
NAME SDT-03-113-Final-AP  
EXPNO 1  
PROCNO 1  
  
F2 - Processing parameters  
SI 32768  
SF 499.7727656 MHz  
WDW EM  
SSB 0  
LB 0.30 Hz  
GB 0  
PC 1.00

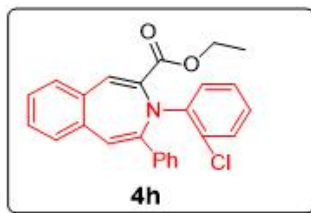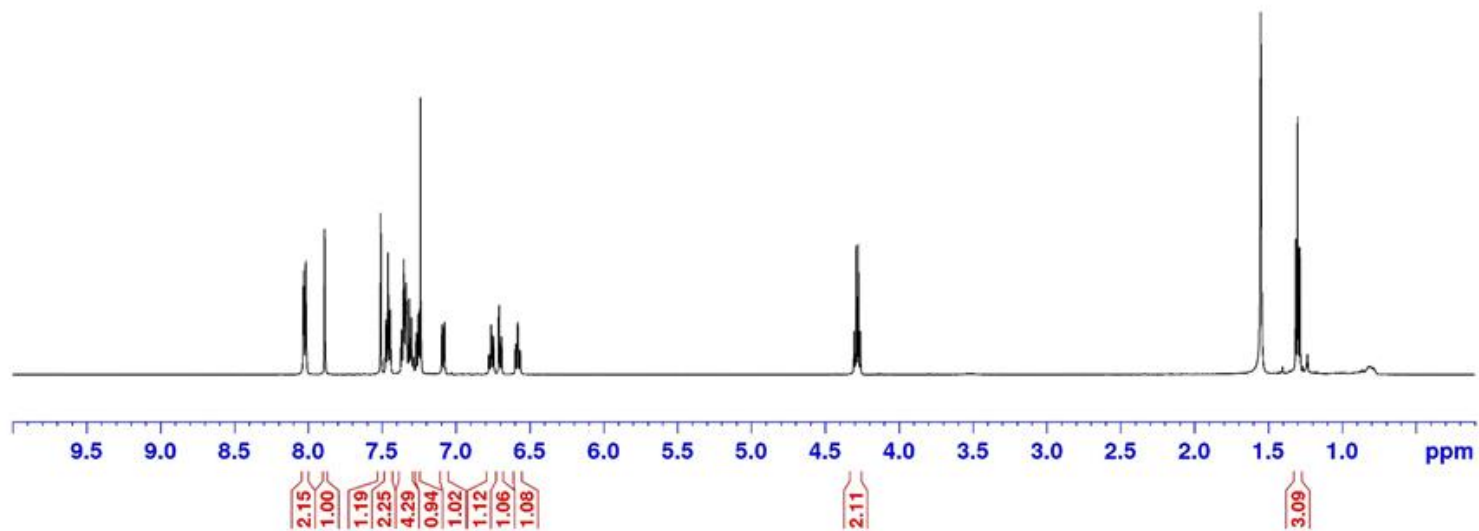

Solvent: CDCl<sub>3</sub>  
SFO1: 175 MHz

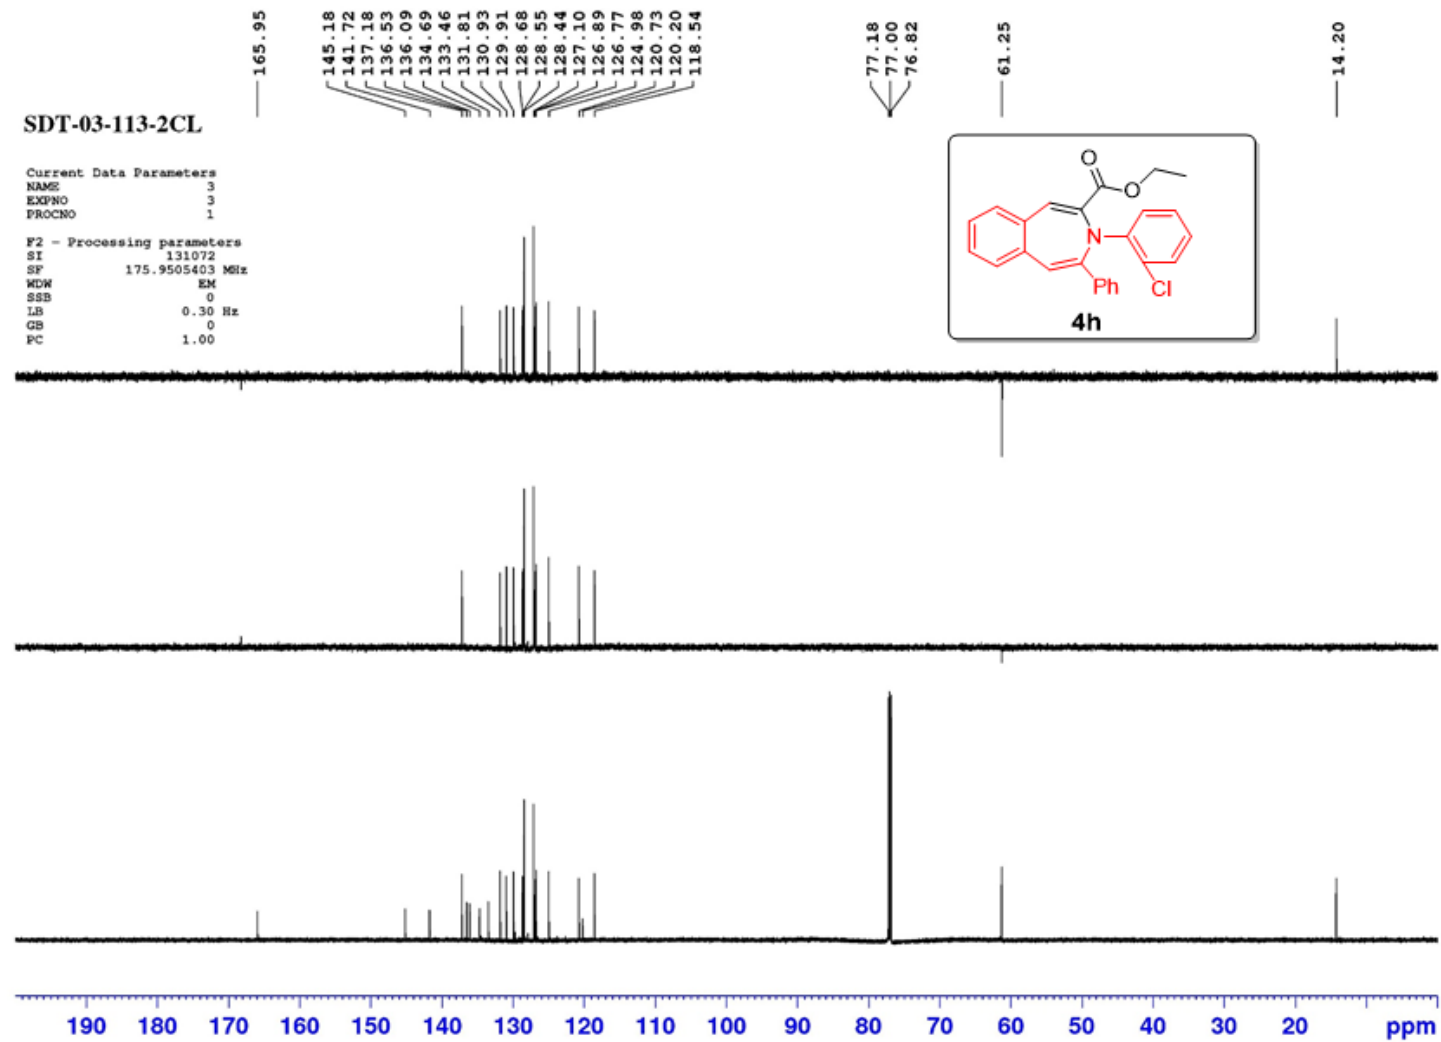

Solvent: CDCl<sub>3</sub>  
SFO1: 700 MHz

SDT-03-124-AP

Current Data Parameters  
NAME SDT-03-124-AP-H.fid  
EXPNO 1  
PROCNO 1

F2 - Processing parameters  
SI 65536  
SF 699.7431016 MHz  
WDW EM  
SSB 0  
LB 0.30 Hz  
GB 0  
PC 1.00

7.987  
7.975  
7.408  
7.397  
7.378  
7.367  
7.324  
7.312  
7.305  
7.290  
7.256  
7.245  
7.240  
7.005  
6.992  
6.982  
6.679  
6.668  
6.514  
6.502

4.346

1.538  
1.367  
1.357  
1.347

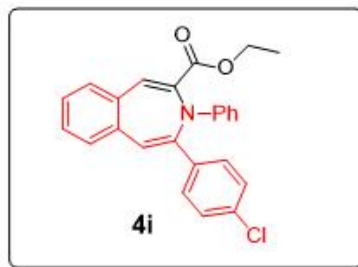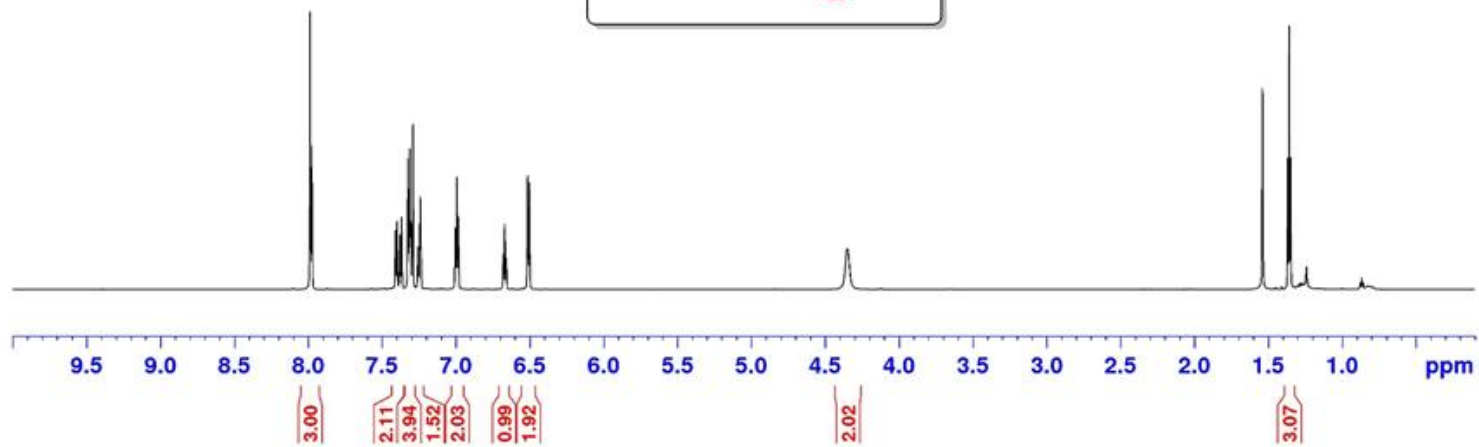

Solvent: CDCl<sub>3</sub>  
SFO1: 175 MHz

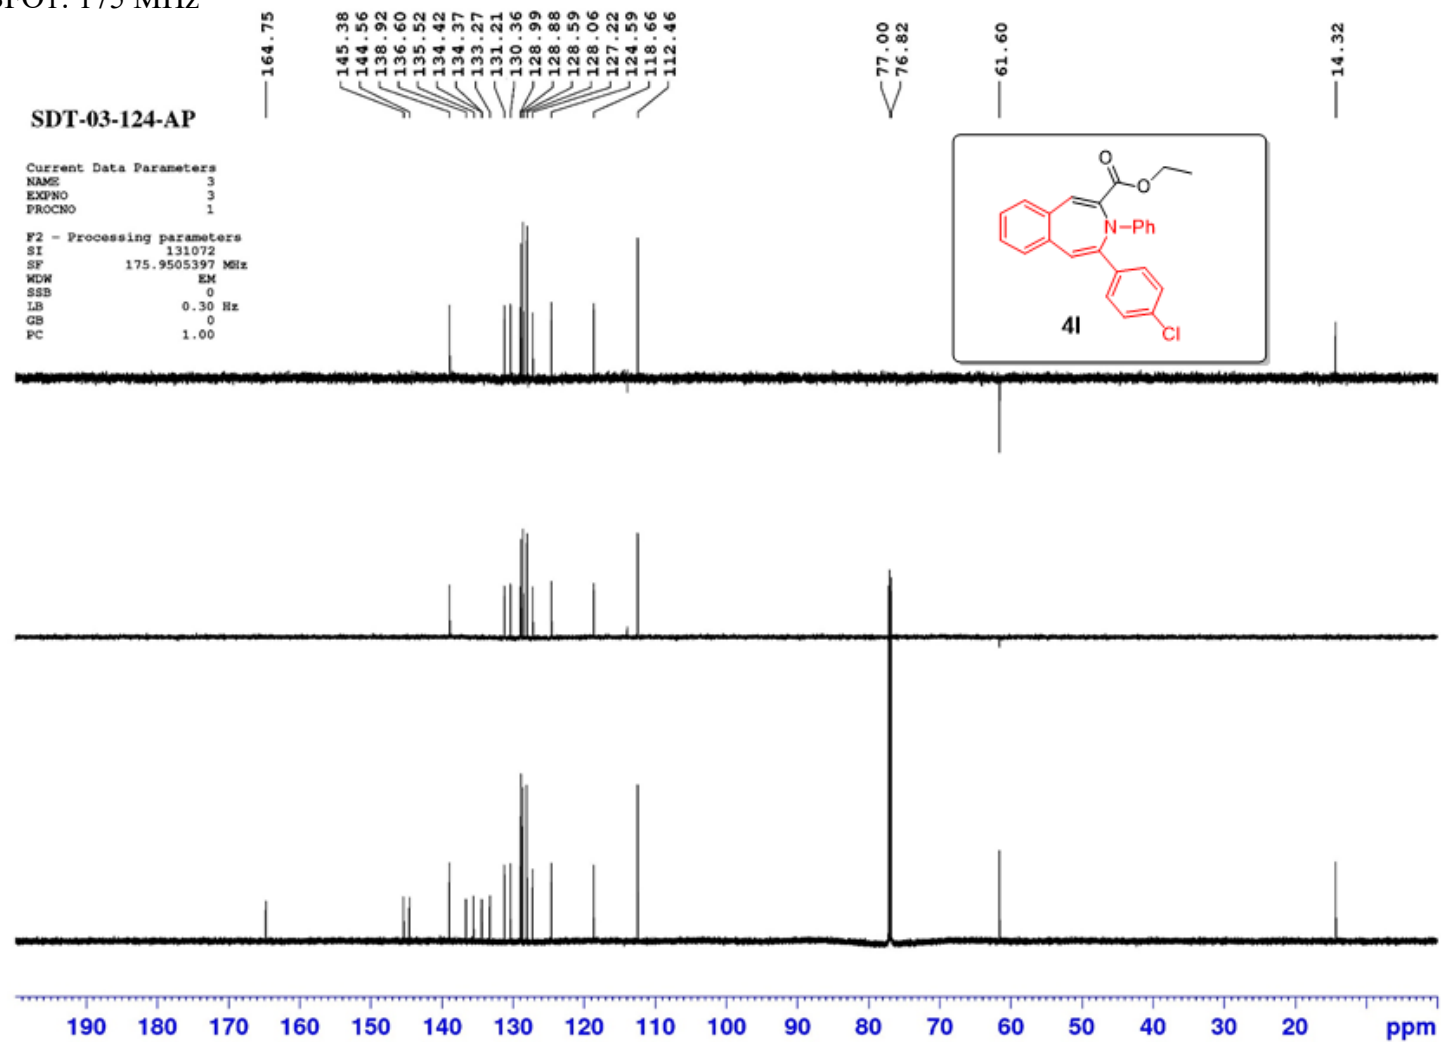

Solvent: CDCl<sub>3</sub>  
SFO1: 700 MHz

7.995  
7.952  
7.920  
7.400  
7.389  
7.377  
7.366  
7.298  
7.288  
7.240  
7.230  
7.220  
7.210  
7.169  
7.158  
6.996  
6.984  
6.973  
6.657  
6.646  
6.636  
6.548  
6.536

4.344

2.350

1.539  
1.363  
1.353  
1.343

SDT-03-125-AP

Current Data Parameters  
NAME SDT-03-125-AP-H.fid  
EXPNO 1  
PROCNO 1

F2 - Processing parameters  
SI 65536  
SF 699.7431014 MHz  
WDW EM  
SSB 0  
LB 0.30 Hz  
GB 0  
PC 1.00

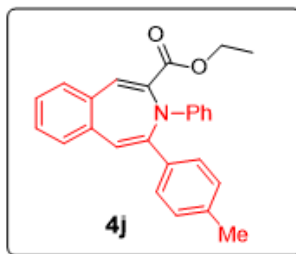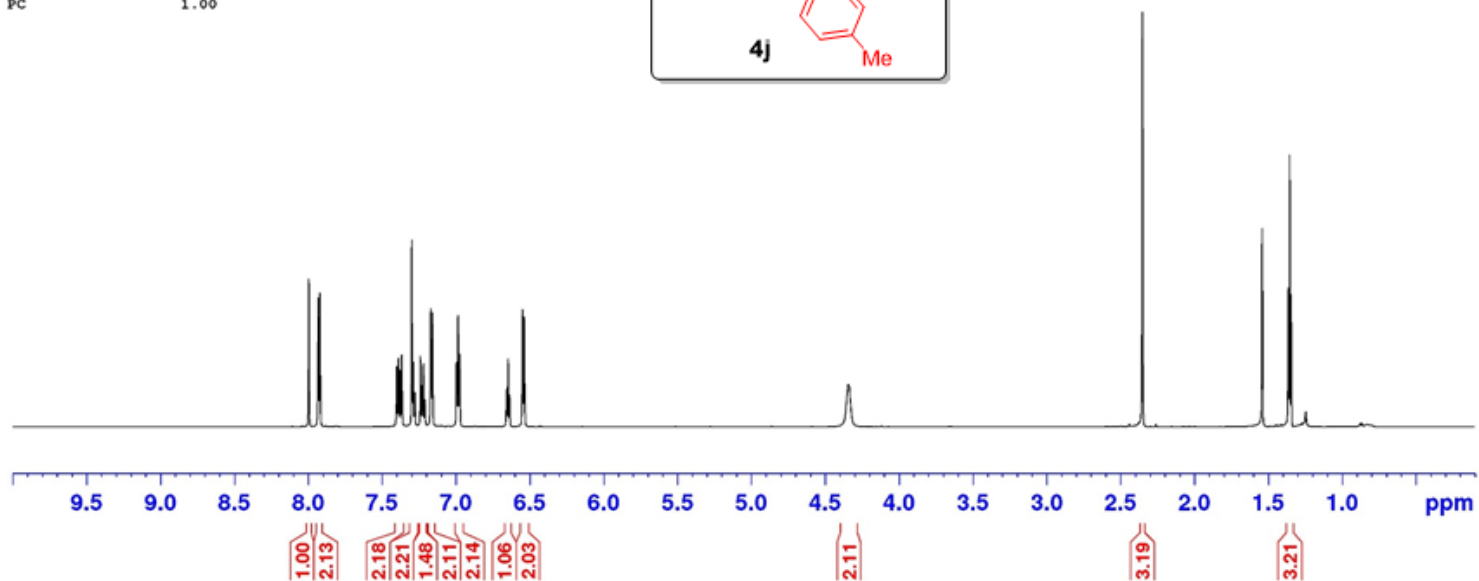



Solvent: CDCl<sub>3</sub>  
SFO1: 175 MHz

SDT-03-125-AP

Current Data Parameters  
NAME 3  
EXPNO 3  
PROCNO 1

F2 - Processing parameters  
SI 131072  
SF 175.9505397 MHz  
WDW EM  
SSB 0  
LB 0.30 Hz  
GB 0  
PC 1.00

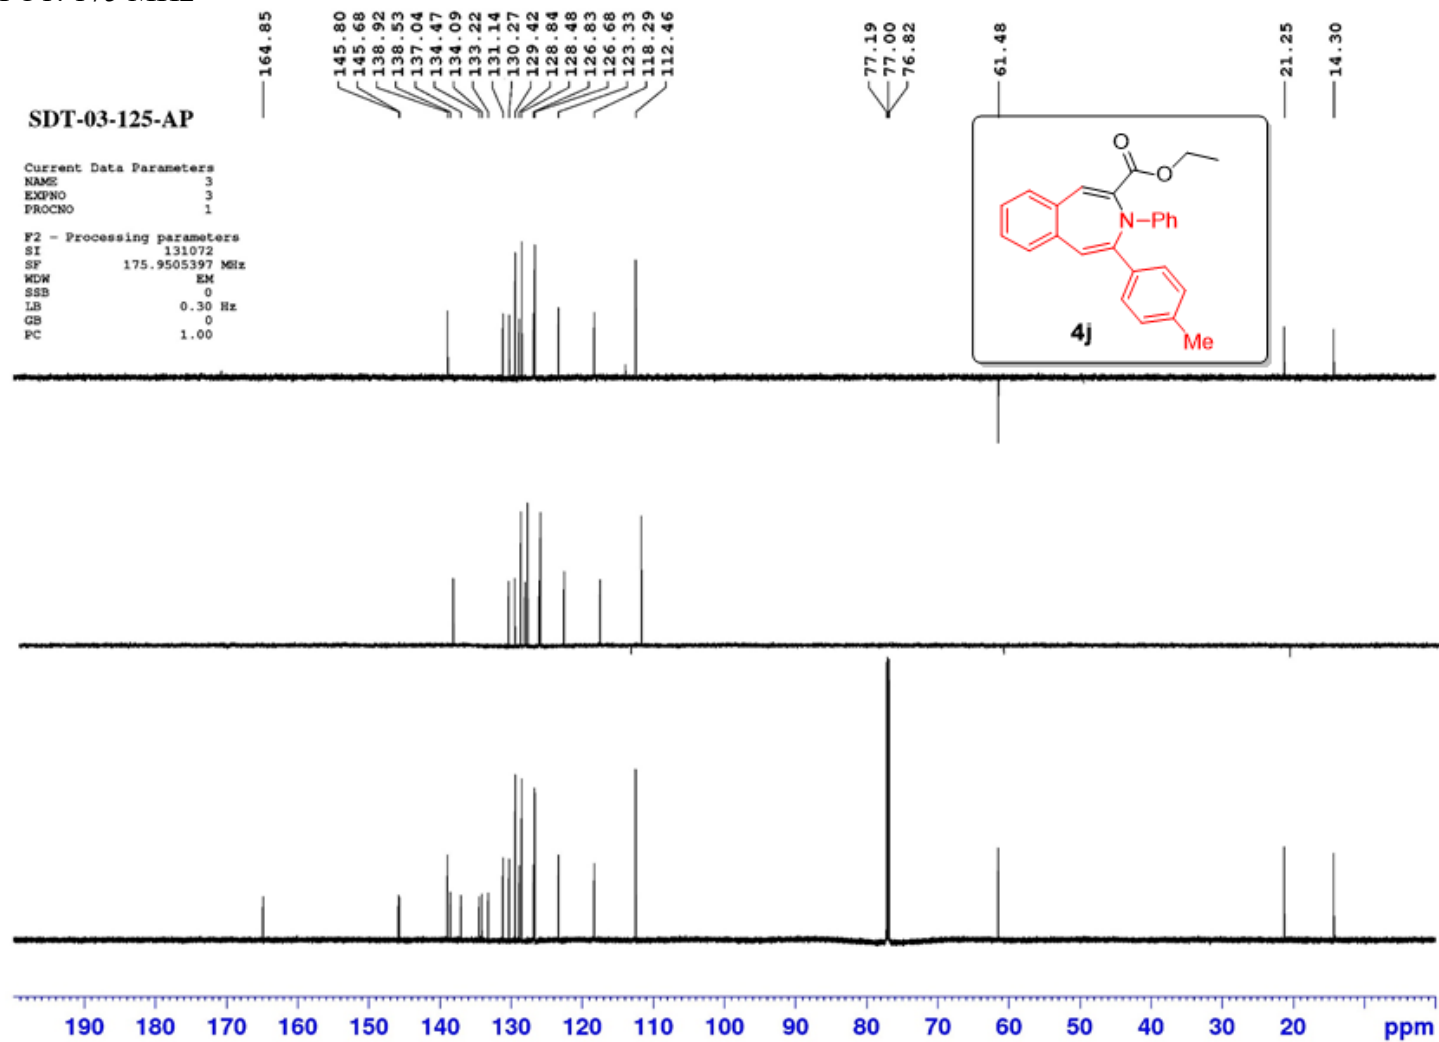

Solvent: CDCl<sub>3</sub>  
SFO1: 500 MHz

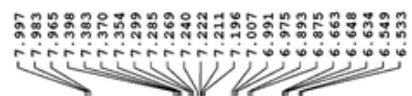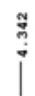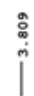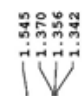

### SDT-03-134-AP

Current Data Parameters  
NAME SDT-03-134-HPLC-AP.  
EXPNO 1  
PROCNO 1

F2 - Processing parameters  
SI 32768  
SF 499.7727655 MHz  
WDW EM  
SSB 0  
LB 0.30 Hz  
GB 0  
PC 1.00

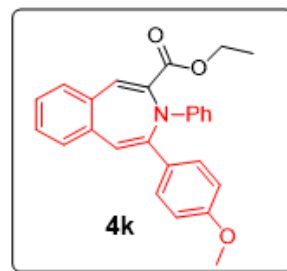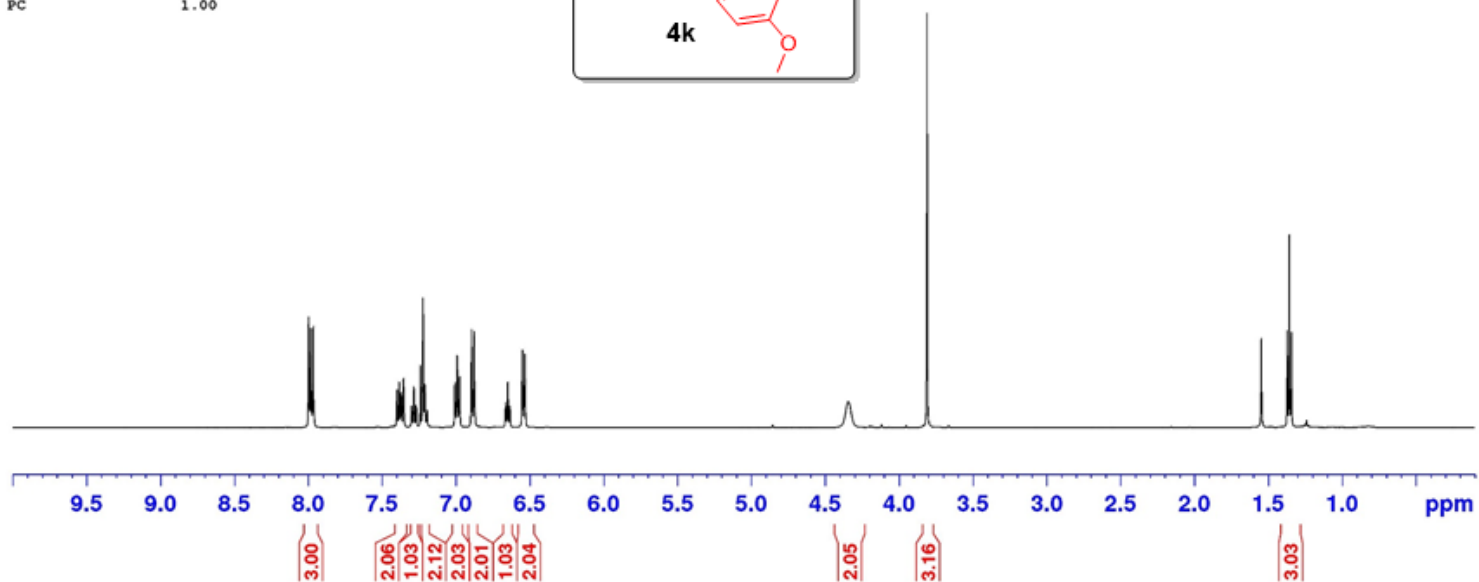

Solvent: CDCl<sub>3</sub>  
SFO1: 175 MHz

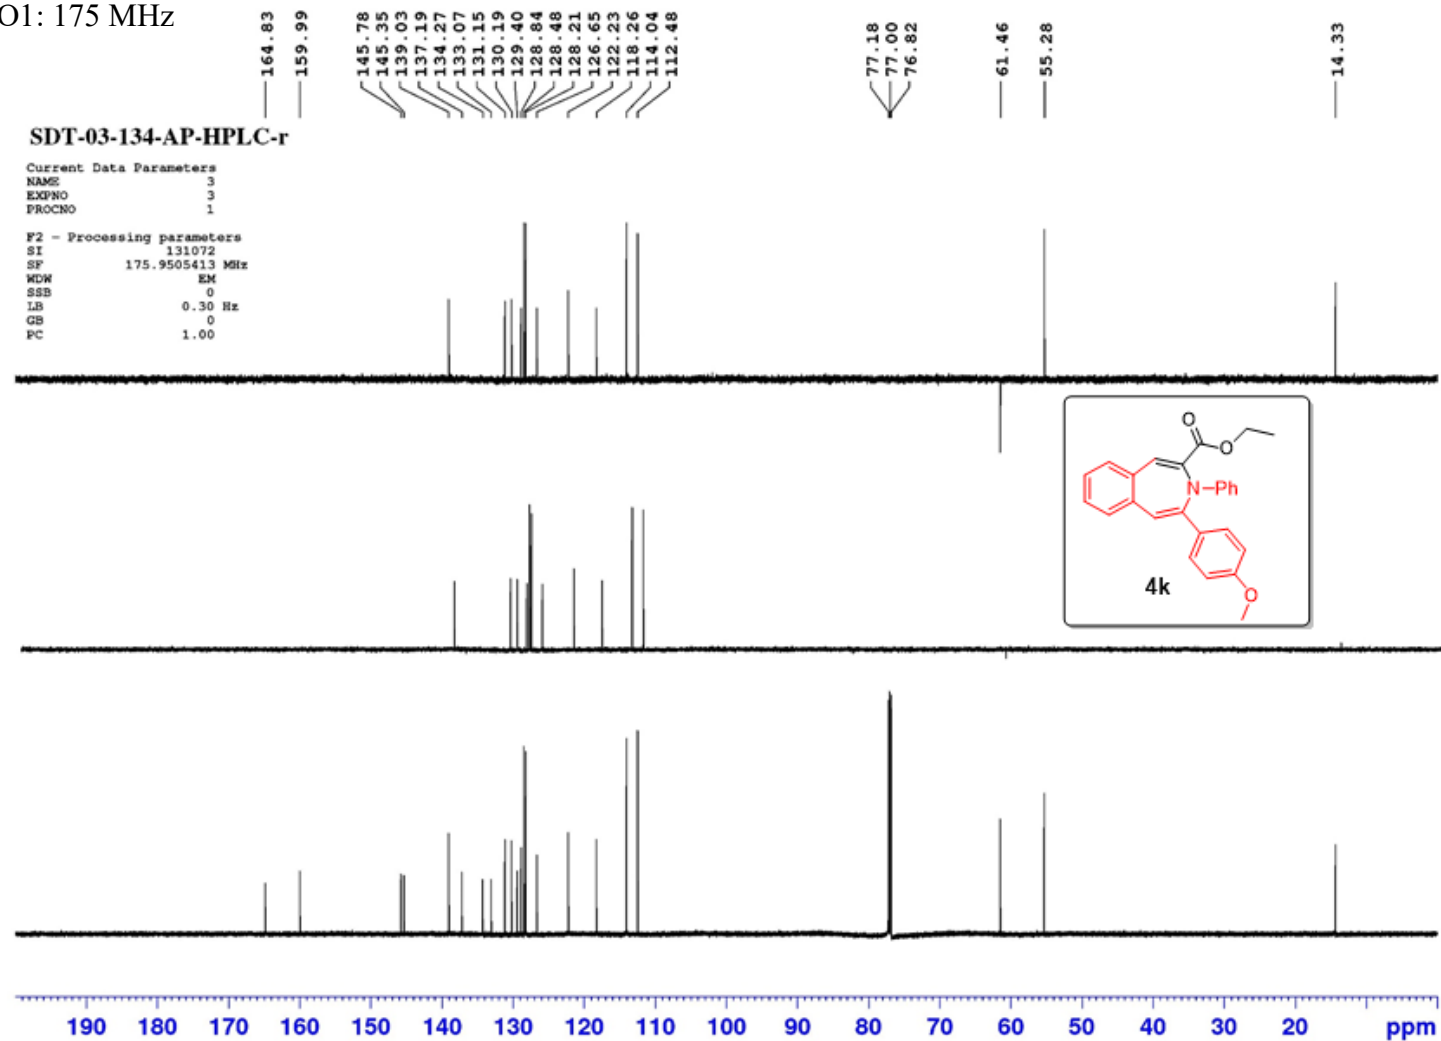

Solvent: CDCl<sub>3</sub>  
SFO1: 700 MHz

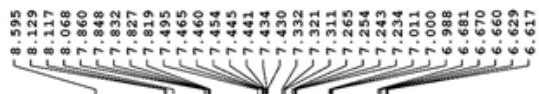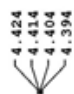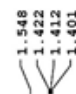

SDT-03-150-AP

Current Data Parameters  
NAME SDT-03-150-AP-H.fid  
EXPNO 1  
PROCNO 1

F2 - Processing parameters  
SI 65536  
SF 699.7431058 MHz  
WDW EM  
SSB 0  
LB 0.30 Hz  
GB 0  
PC 1.00

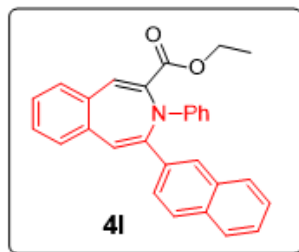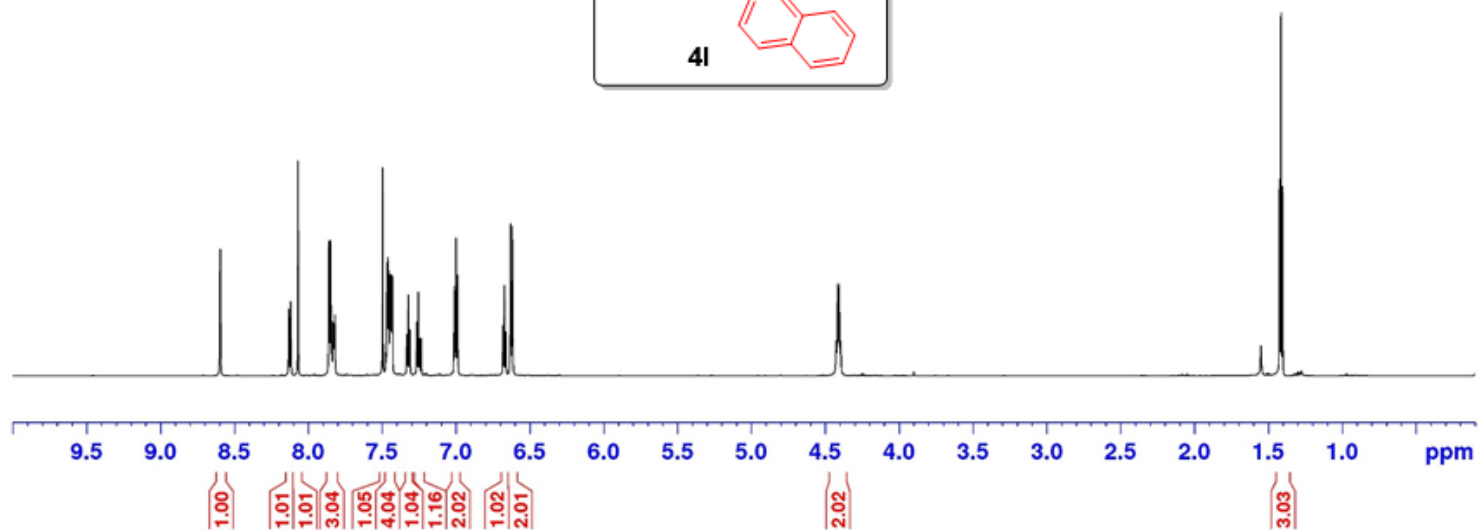

SDT-03-150-AP

Solvent: CDCl<sub>3</sub>  
SFO1: 175 MHz

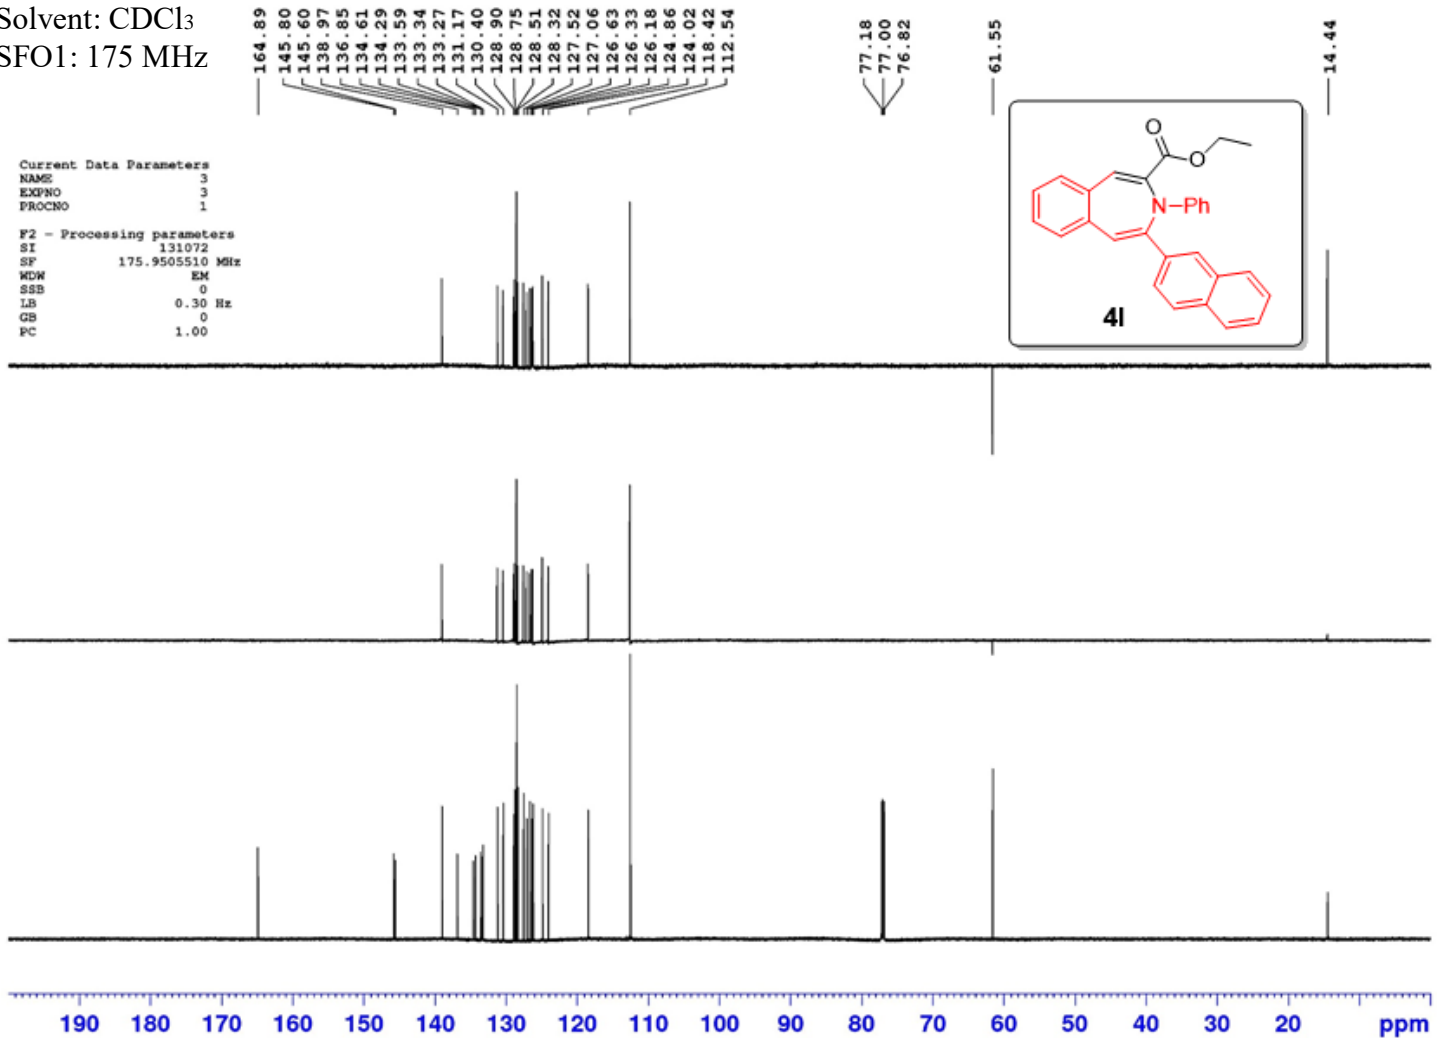

Solvent: CDCl<sub>3</sub>  
SFO1: 400 MHz

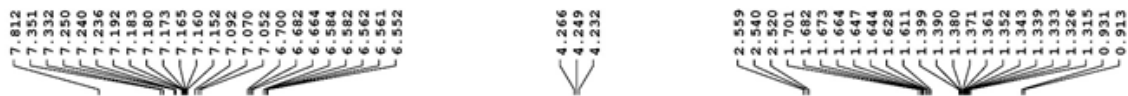

SDT-03-137-AP-A

Current Data Parameters  
NAME SDT-03-137-AP-A  
EXPNO 1  
PROCNO 1

F2 - Acquisition Parameters  
Date\_ 20220422  
Time 22.48  
INSTRUM spect  
PROBHD 5 mm DUL 13C-1  
PULPROG zg30  
TD 32768  
SOLVENT CDCl<sub>3</sub>  
NS 6  
DS 0  
SWH 6410.256 Hz  
FIDRES 0.195625 Hz  
AQ 2.5559039 sec  
RG 362  
DW 78.000 usec  
DE 6.00 usec  
TE 300.0 K  
D1 2.00000000 sec  
TD0 1

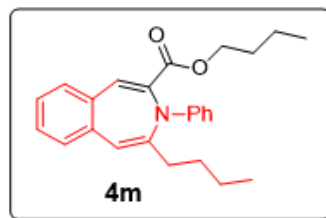

===== CHANNEL f1 =====  
NUC1 1H  
P1 10.00 usec  
PL1 -2.40 dB  
SFO1 400.1528010 MHz

F2 - Processing parameters  
SI 16384  
SF 400.1500175 MHz  
WDW EM  
SSB 0  
LB 0 Hz  
GB 0  
PC 1.00

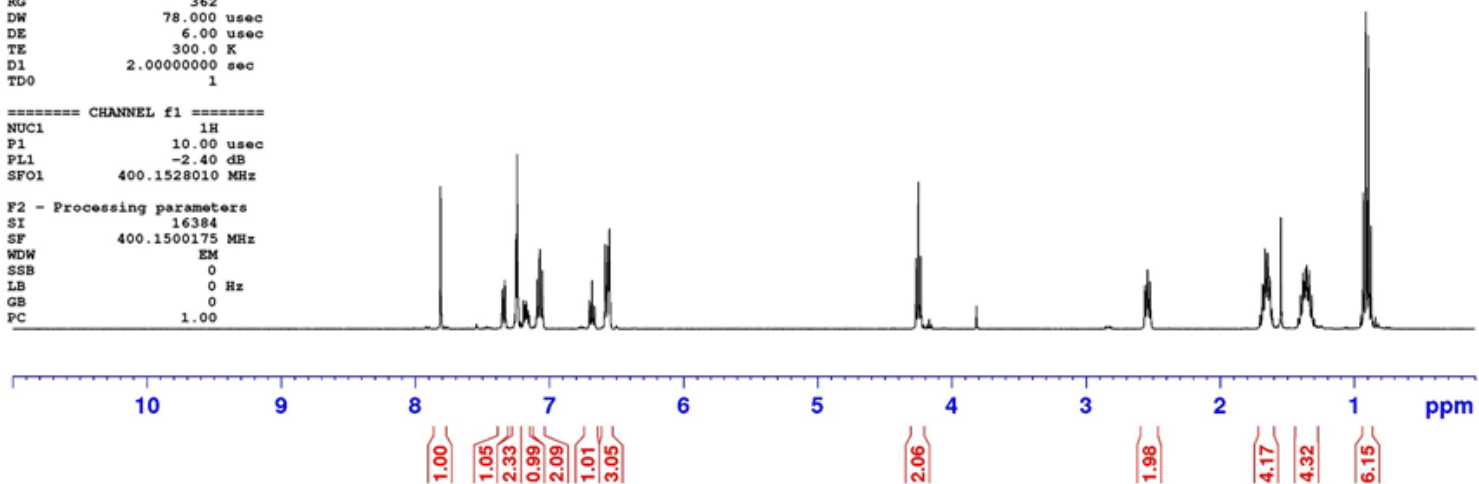

Solvent: CDCl<sub>3</sub>  
SFO1: 175 MHz

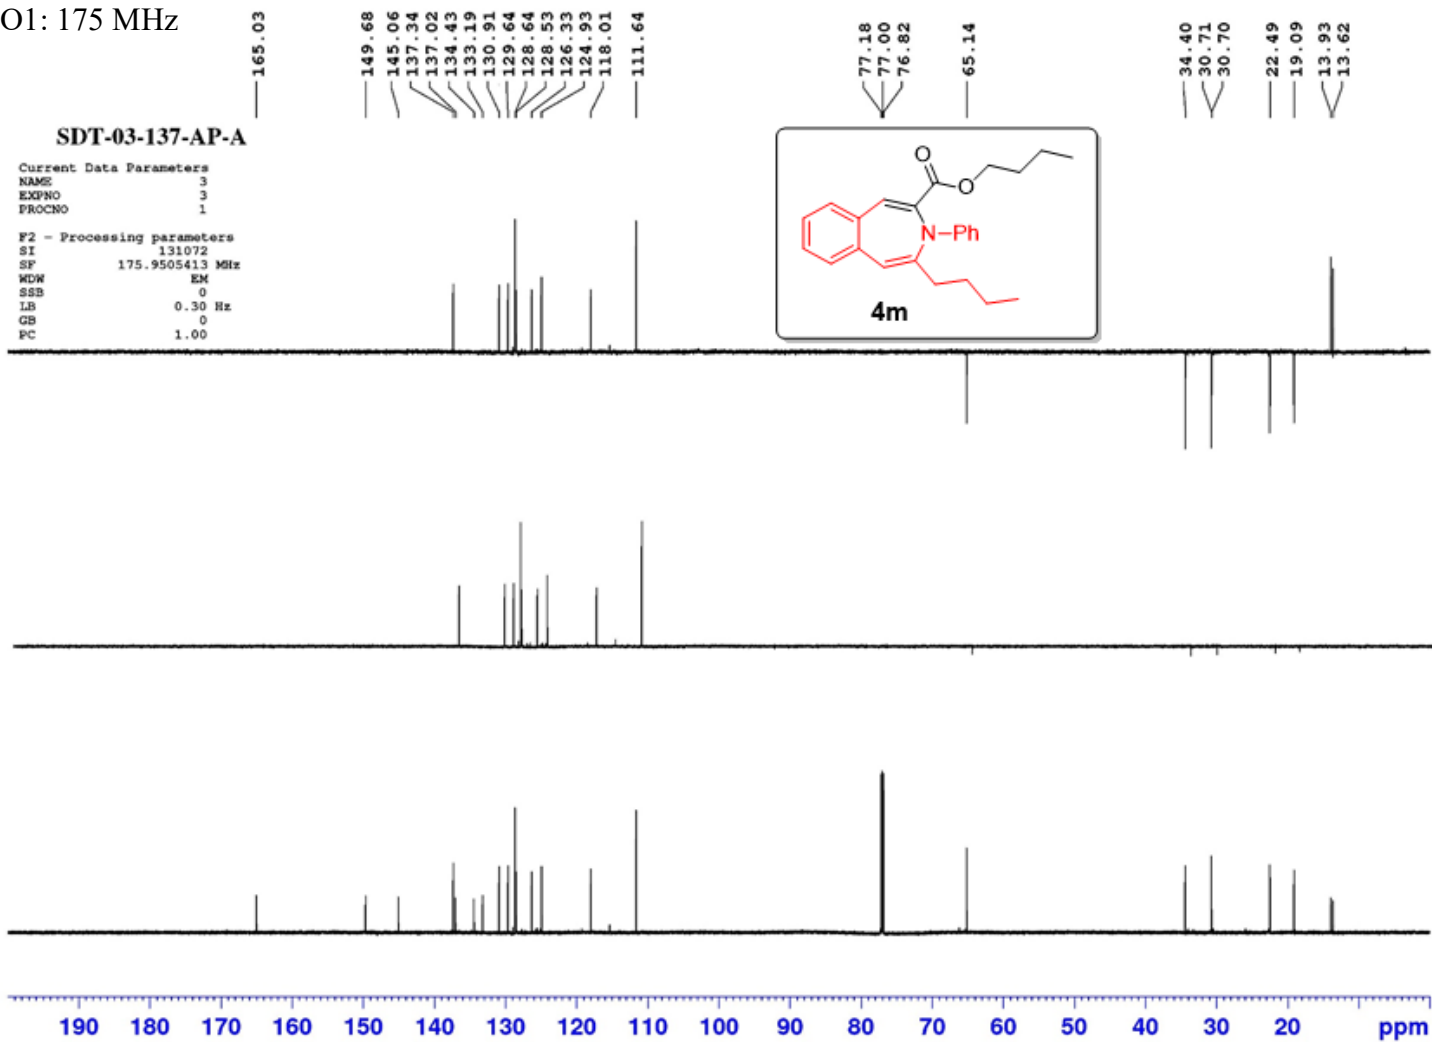

Solvent: CDCl<sub>3</sub>  
SFO1: 700 MHz

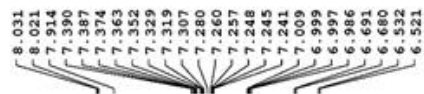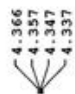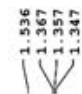

SDT-03-135-AP

Current Data Parameters  
NAME SDT-03-135-AP-H.fid  
EXPNO 1  
PROCNO 1

F2 - Processing parameters  
SI 65536  
SF 699.7430960 MHz  
WDW EM  
SSB 0  
LB 0.30 Hz  
GB 0  
PC 1.00

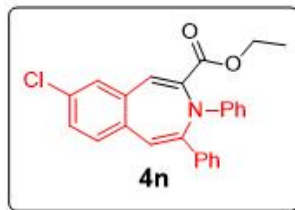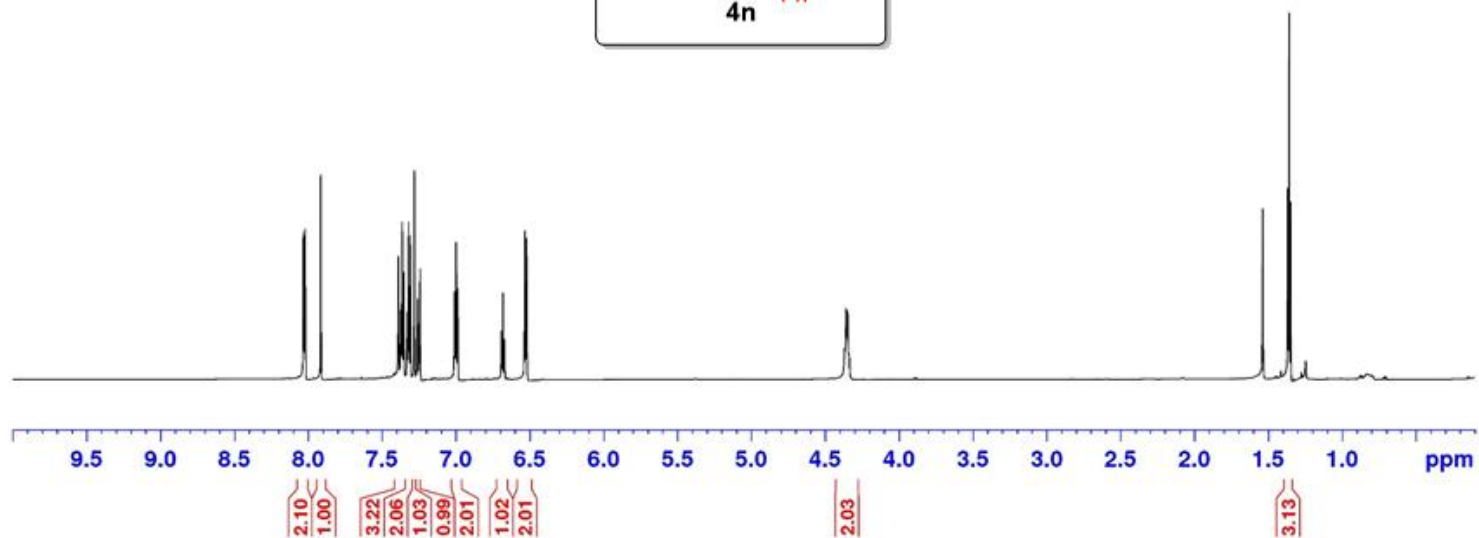



Solvent: CDCl<sub>3</sub>  
SFO1: 175 MHz

SDT-03-135-AP

Current Data Parameters  
NAME 3  
EXPNO 3  
PROCNO 1

F2 - Processing parameters  
SI 131072  
SF 175.9505382 MHz  
WDW EM  
SSB 0  
LB 0.30 Hz  
GB 0  
PC 1.00

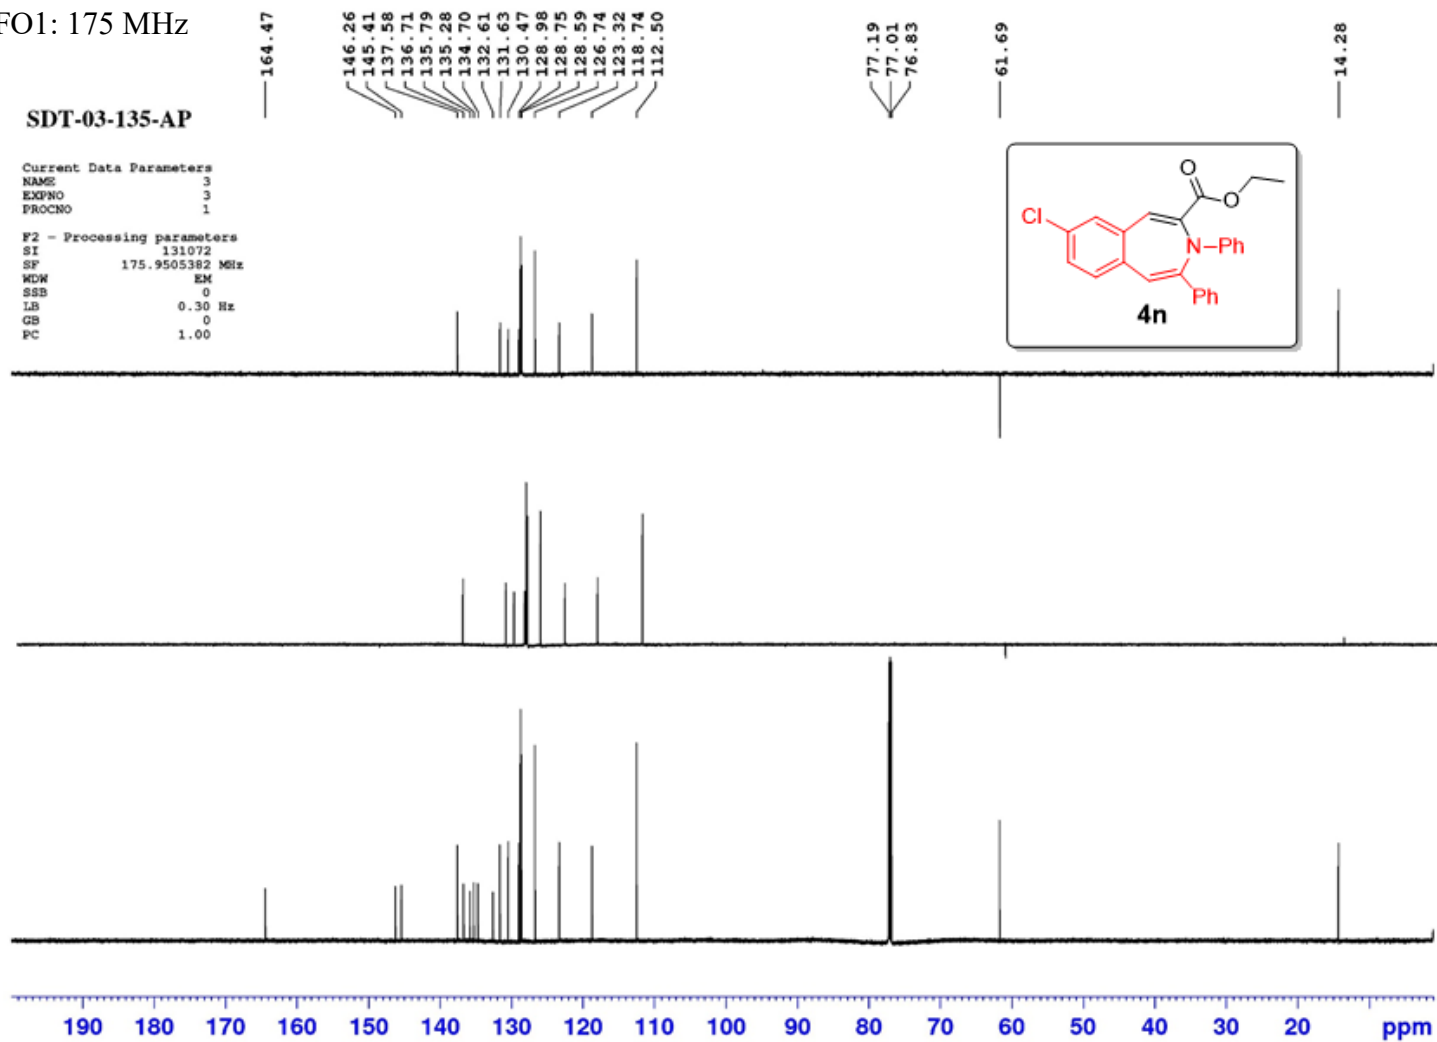

Solvent: CDCl<sub>3</sub>  
SFO1: 700 MHz

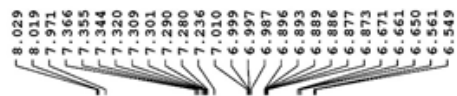

4.351

3.785

1.547  
1.368  
1.358  
1.348

SDT-03-148-AP-r

Current Data Parameters  
NAME SDT-03-148-AP-r-H.f  
EXPNO 1  
PROCNO 1

F2 - Processing parameters  
SI 65536  
SF 699.7431048 MHz  
WDW EM  
SSB 0  
LB 0.30 Hz  
GB 0  
PC 1.00

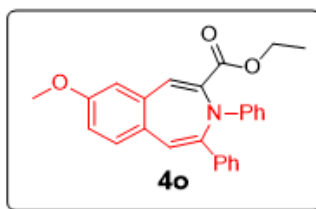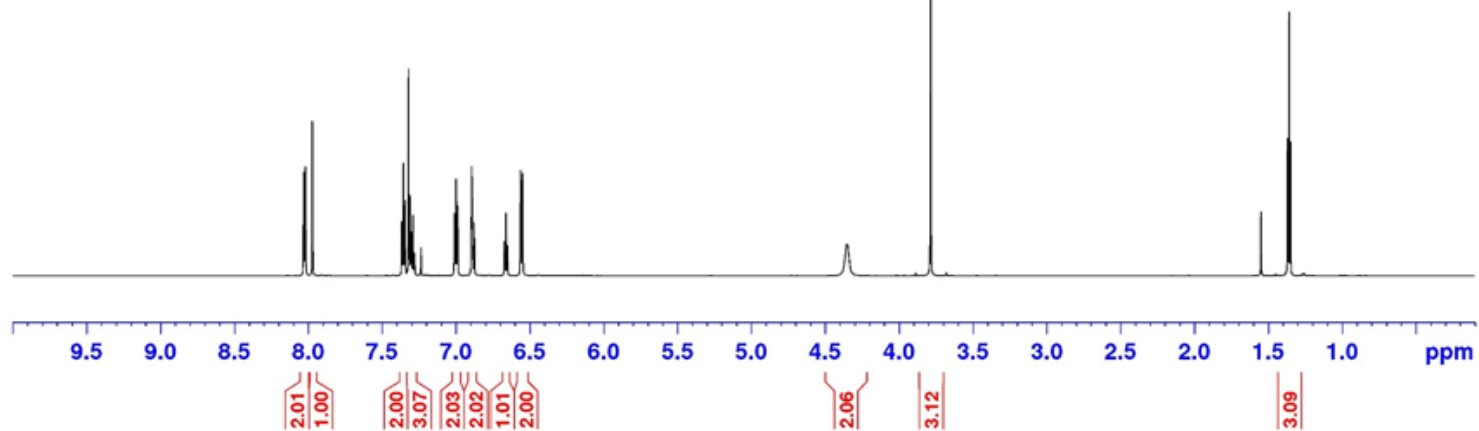

SDT-03-148-AP-r

Solvent: CDCl<sub>3</sub>  
SFO1: 175 MHz

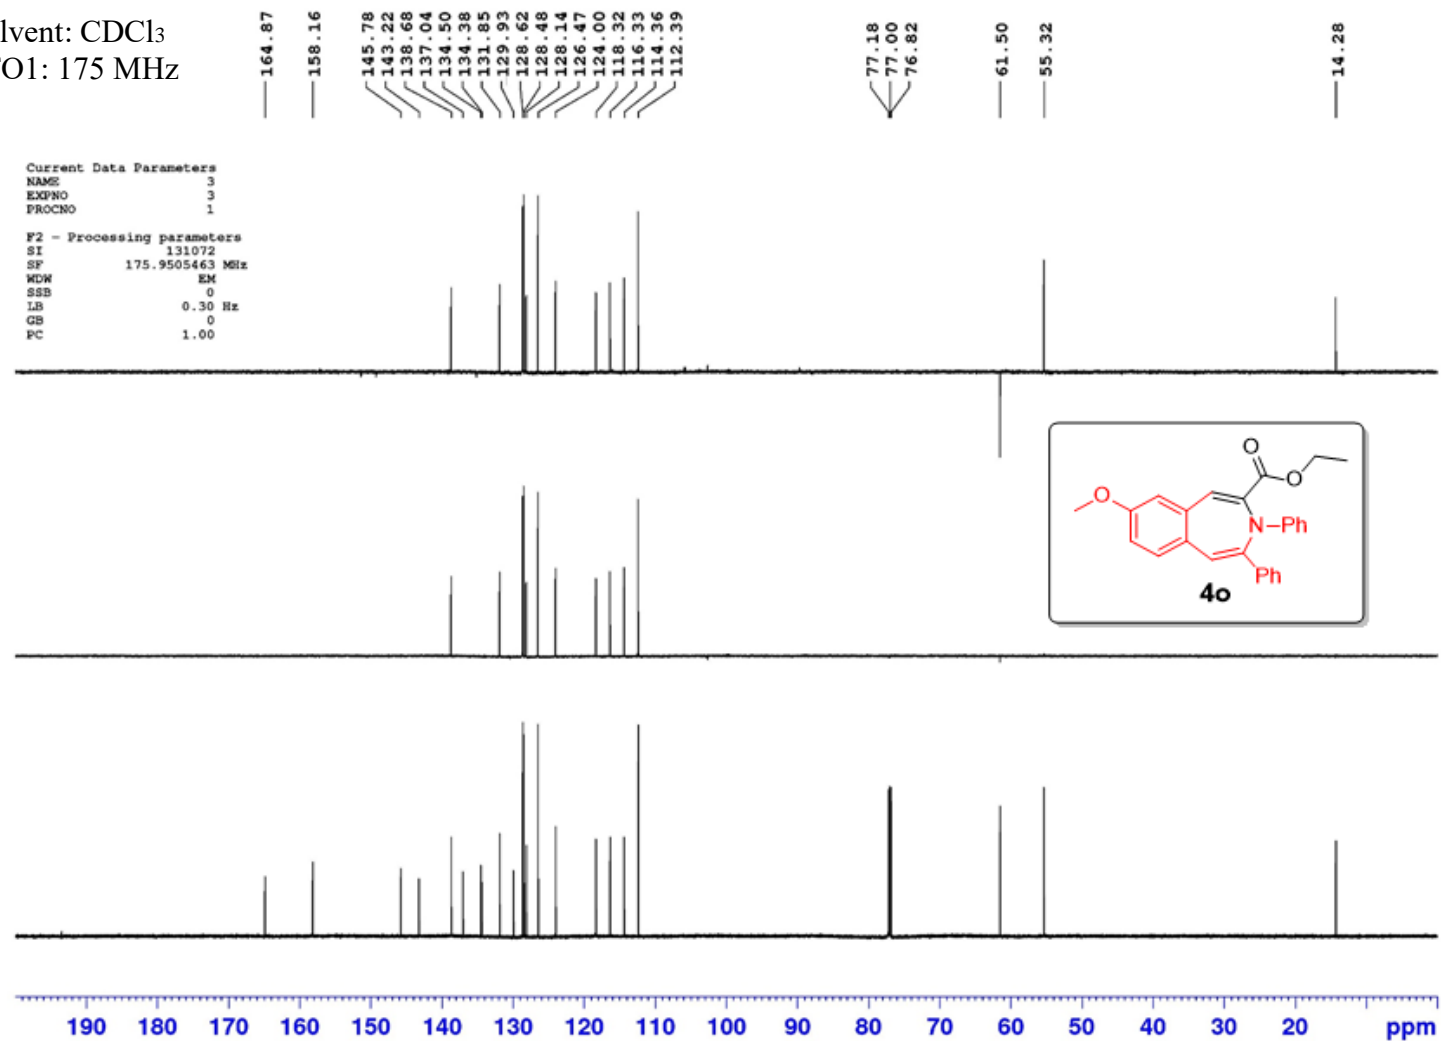

Solvent: CDCl<sub>3</sub>  
SFO1: 700 MHz

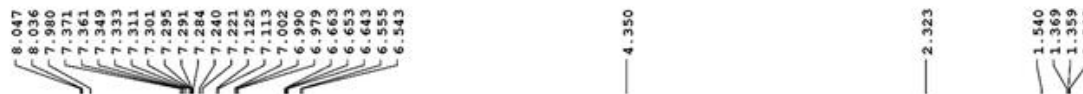

SDT-03-168-AP

Current Data Parameters  
NAME SDT-03-168-AP-H.fid  
EXPNO 1  
PROCNO 1

F2 - Processing parameters  
SI 65536  
SF 699.7431023 MHz  
WDW EM  
SSB 0  
LB 0.30 Hz  
GB 0  
PC 1.00

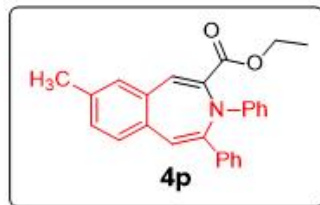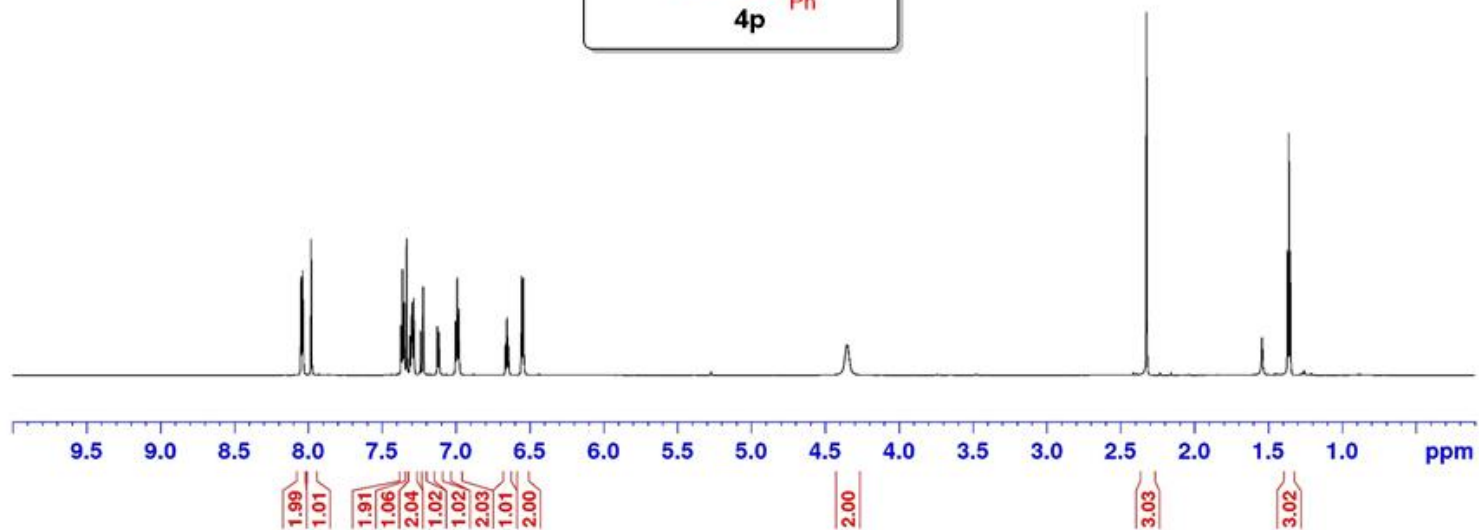

Solvent: CDCl<sub>3</sub>  
SFO1: 175 MHz

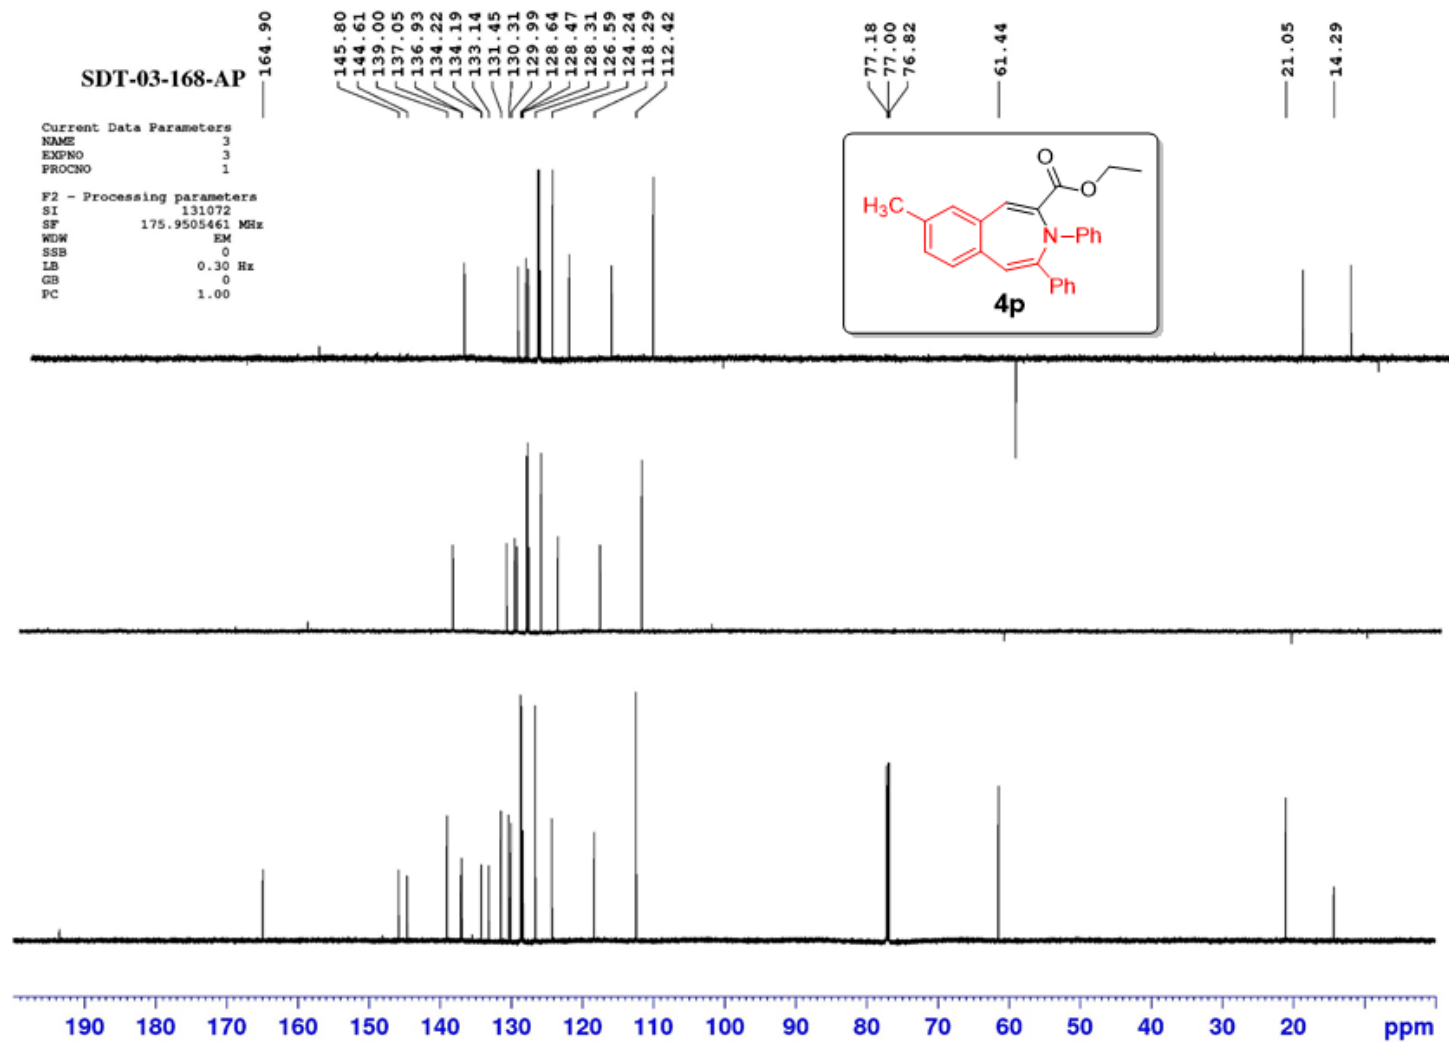

Solvent: CDCl<sub>3</sub>  
SFO1: 700 MHz

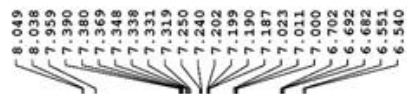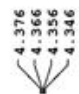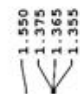

SDT-03-157-AP

Current Data Parameters  
NAME SDT-03-157-AP-H.fid  
EXPNO 1  
PROCNO 1

F2 - Processing parameters  
SI 65536  
SF 699.7431019 MHz  
WDW EM  
SSB 0  
LB 0.30 Hz  
GB 0  
PC 1.00

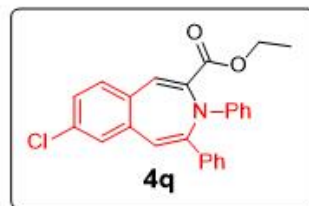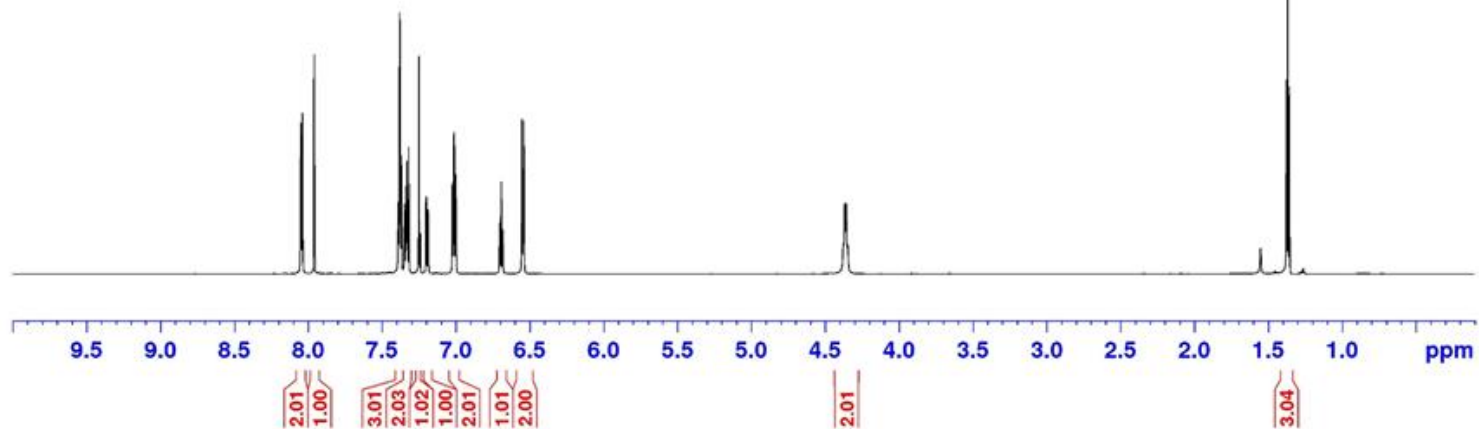

Solvent: CDCl<sub>3</sub>  
SFO1: 175 MHz

SDT-03-157-AP

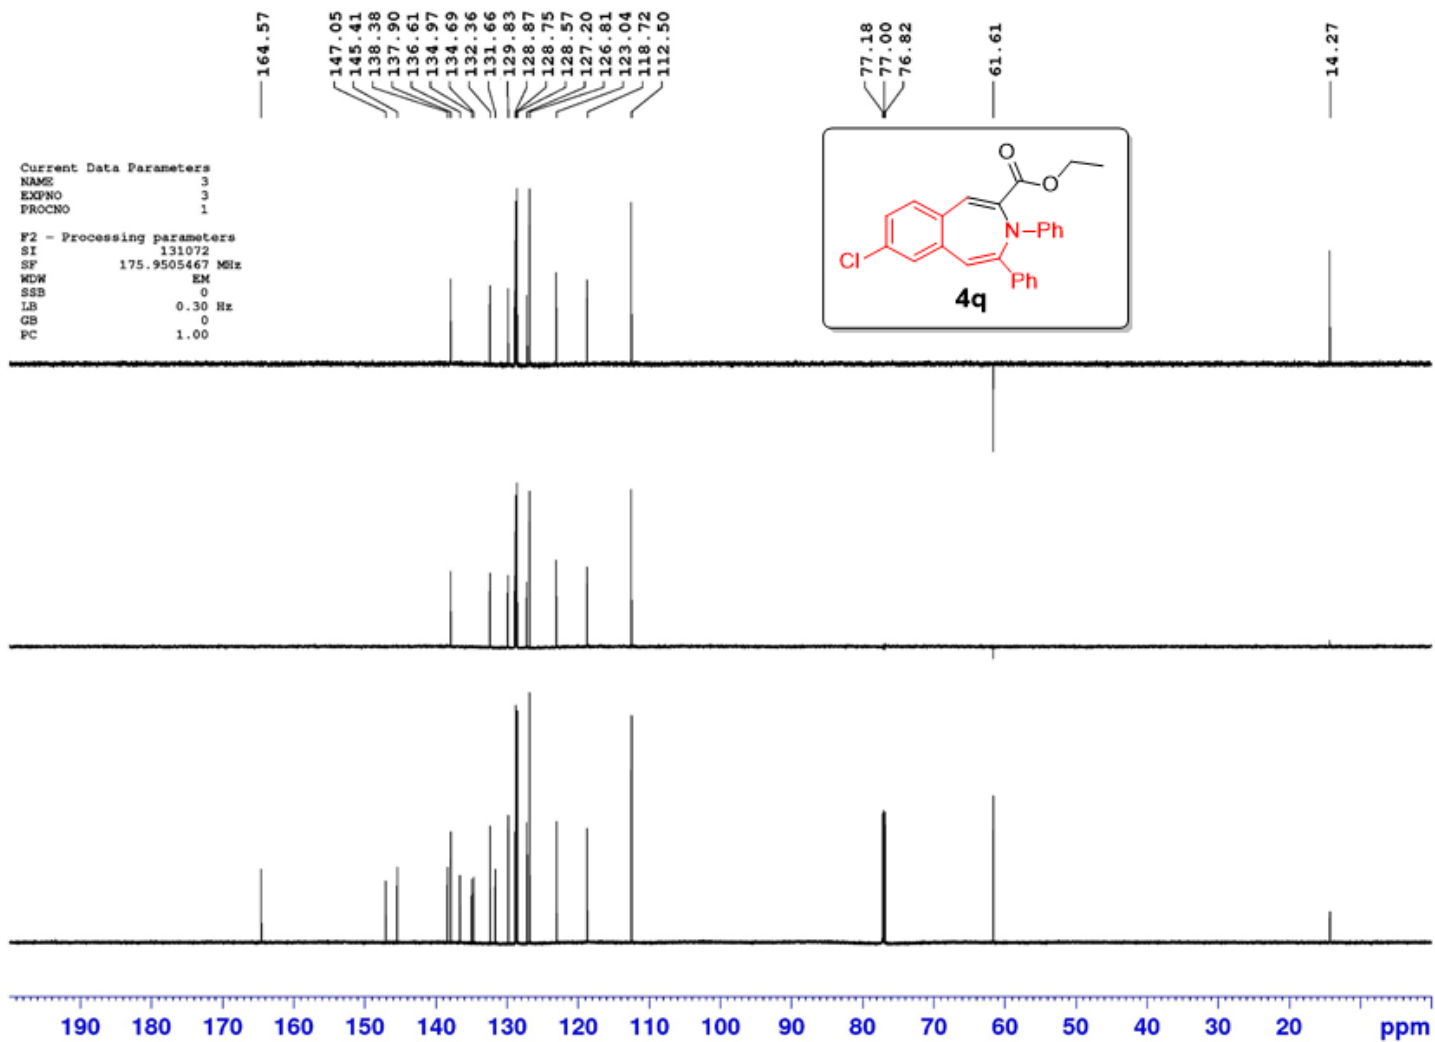

Solvent: CDCl<sub>3</sub>  
SFO1: 700 MHz

8.057  
8.047  
7.977  
7.395  
7.390  
7.387  
7.380  
7.374  
7.368  
7.347  
7.339  
7.333  
7.326  
7.269  
7.240  
7.085  
7.072  
7.068  
7.022  
7.010  
6.999  
6.964  
6.960  
6.952  
6.949  
6.941  
6.937  
6.697  
6.687  
6.676  
6.557  
6.546

4.366  
4.356

1.556  
1.376  
1.365  
1.355

SDT-03-151-AP

Current Data Parameters  
NAME SDT-03-151-AP-H.fid  
EXPNO 1  
PROCNO 1

F2 - Processing parameters  
SI 65536  
SF 699.7431018 MHz  
WDW EM  
SSB 0  
LB 0.30 Hz  
GB 0  
PC 1.00

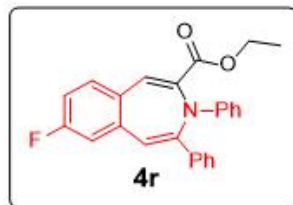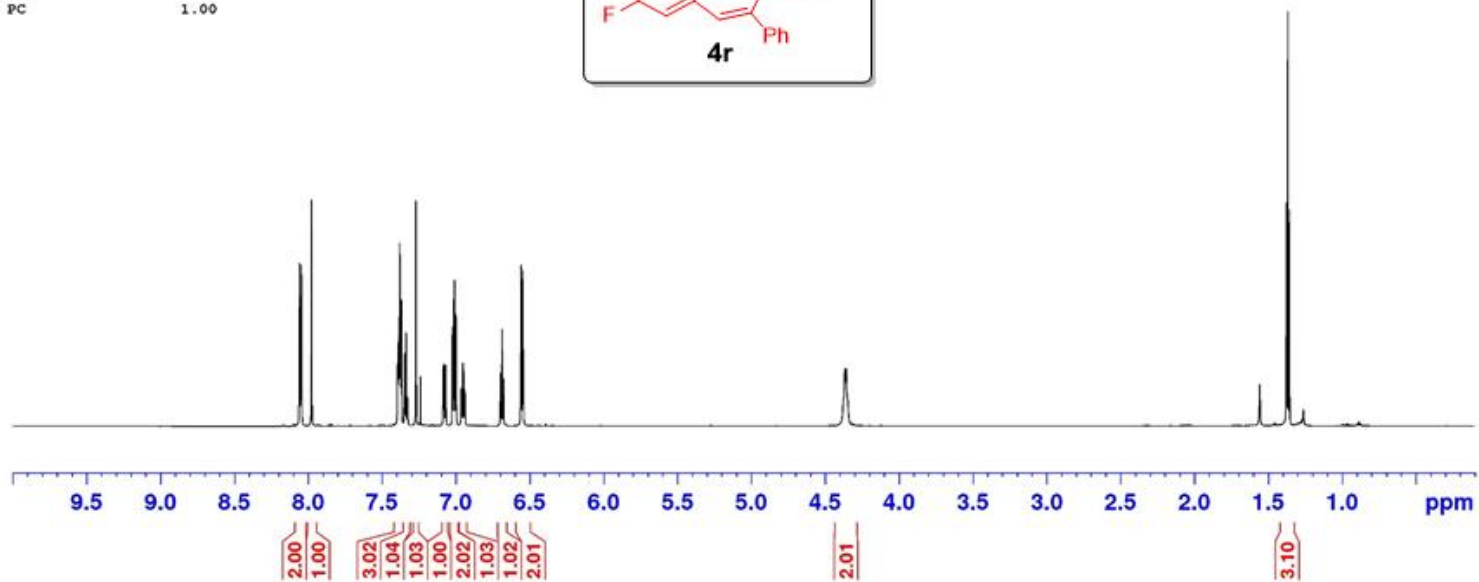



SDT-03-151-AP

Solvent: CDCl<sub>3</sub>  
SFO1: 175 MHz

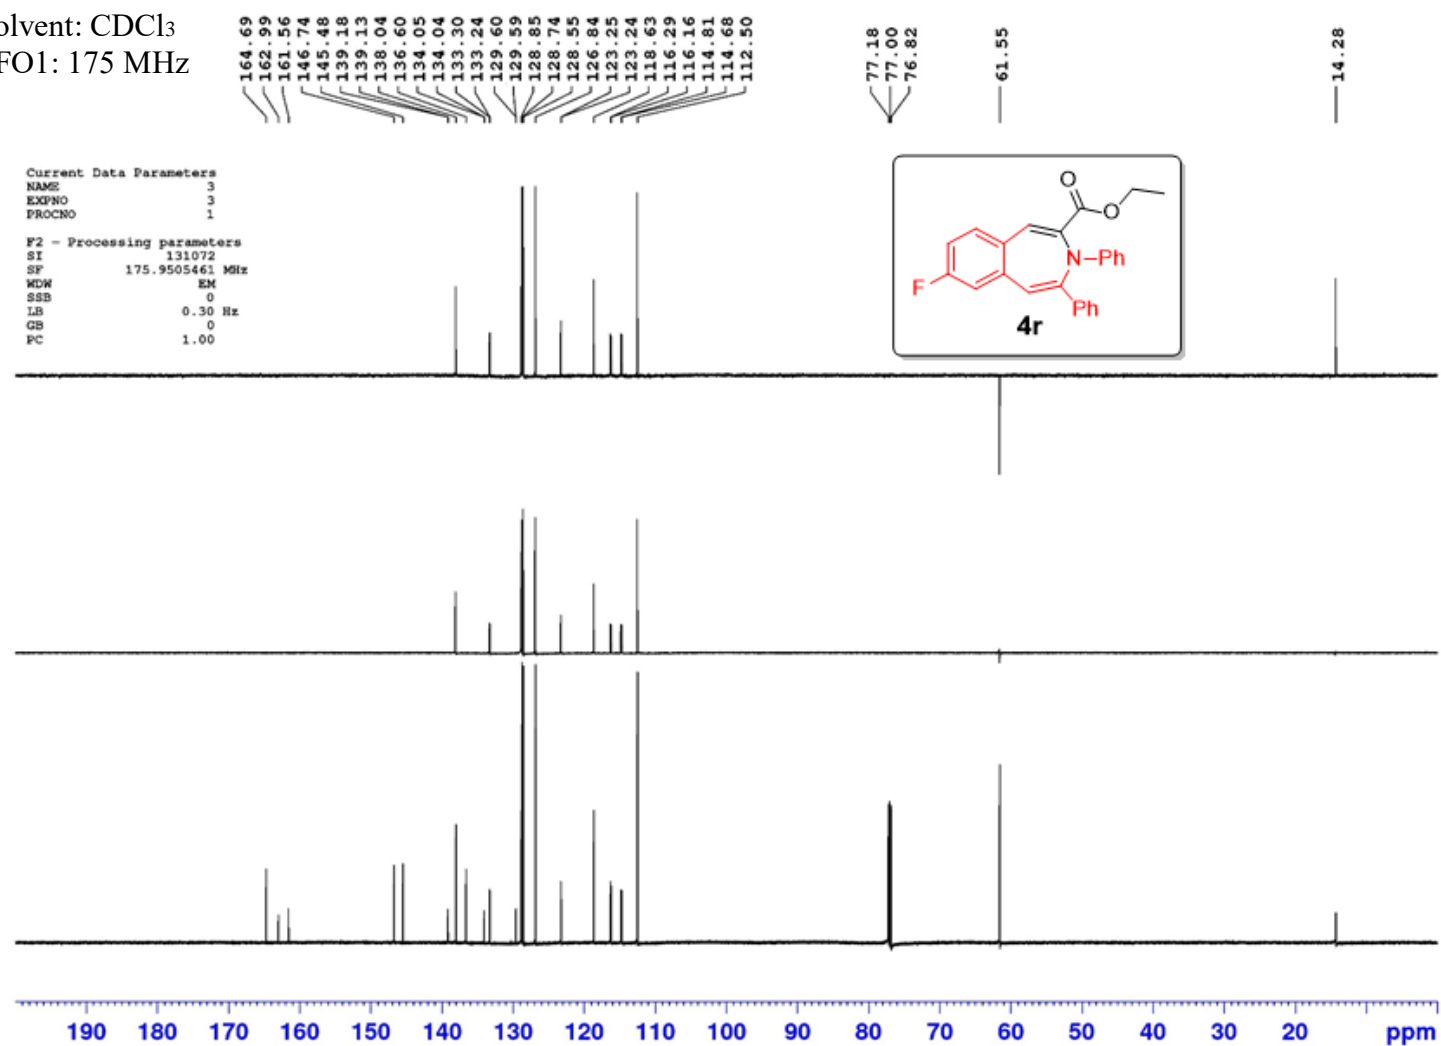

Solvent: CDCl<sub>3</sub>  
SFO1: 500 MHz

DT-03-151-AP-19F

```
Current Data Parameters
ME 1100220512.001
PNO 1
OCNO 1

! - Acquisition Parameters
te_ 20220512
se 9.42 h
STRUM spect
ICBD 2119470 0234
PLPRG zqf1qgn.2
) 131072
SOLVENT CDCl3
I 128
L 4
IN 170454.547 Hz
IPRES 1.300485 Hz
) 0.3844779 sec
I 191.01
E 2.933 usec
I 6.50 usec
I 300.4 K
I 1.00000000 sec
II 0.03000000 sec
I2 0.00002000 sec
D0 1
FO1 470.5735434 MHz
PC1 19F
I 15.00 usec
WI 48.50000000 M
FO2 500.1620004 MHz
PC2 1H
IPPRG2 waltz16
PC3 80.00 usec
WI 29.50000000 M
WI2 0.46094000 M

! - Processing parameters
I 65536
F 470.6206054 MHz
SF 120
IB 0
S 0 3.00 Hz
: 1.00
```

--111.031

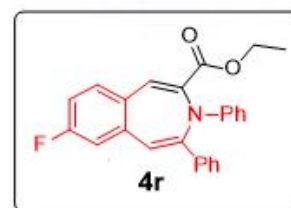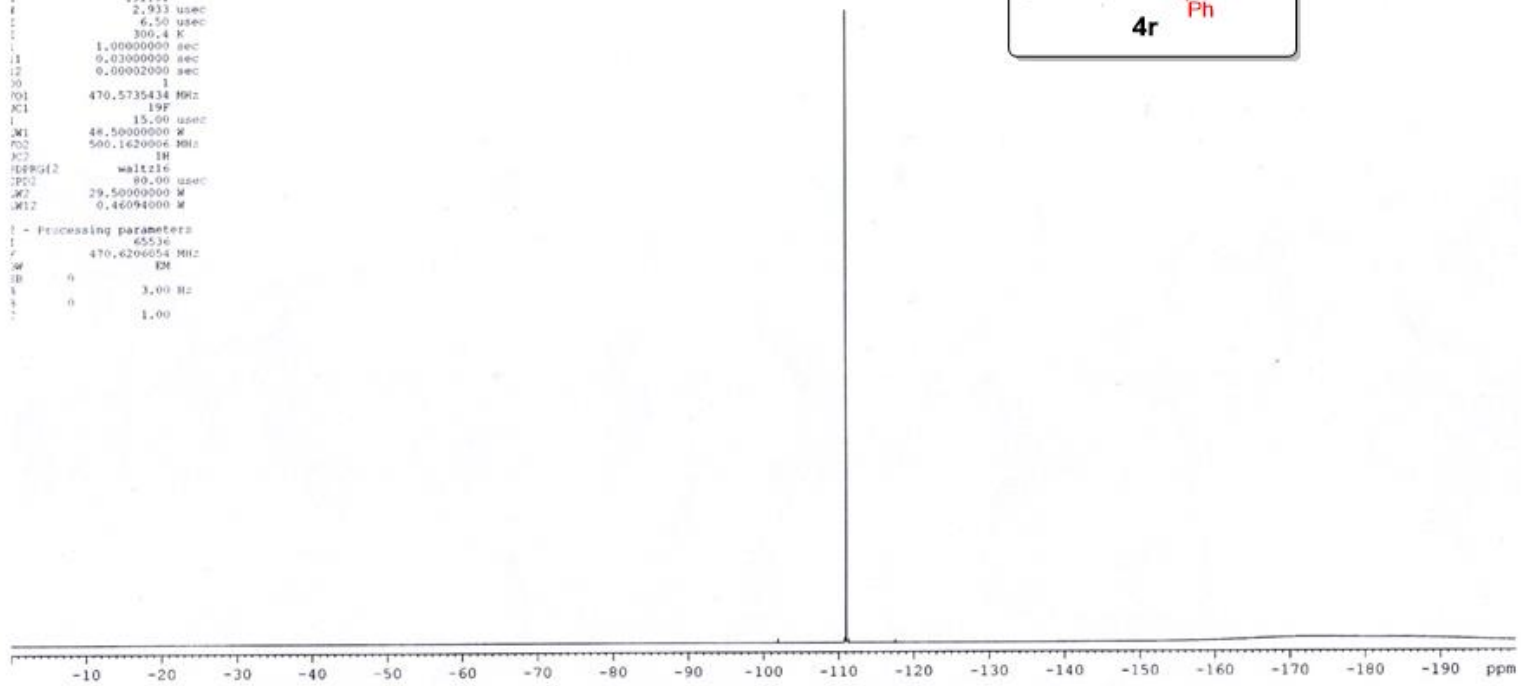

Solvent: CDCl<sub>3</sub>  
SFO1: 500 MHz

8.041  
8.026  
7.983  
7.369  
7.355  
7.339  
7.306  
7.298  
7.292  
7.240  
7.201  
7.060  
7.045  
6.994  
6.977  
6.962  
6.654  
6.639  
6.625  
6.536  
6.519

4.333

2.330

1.560  
1.560  
1.546  
1.332  
1.232

SDT-03-158-AP-B

Current Data Parameters  
NAME SDT-03-158-Au-AP-B  
EXPNO 1  
PROCNO 1

F2 - Processing parameters  
SI 32768  
SF 499.7727655 MHz  
WDW EM  
SSB 0  
LB 0.30 Hz  
GB 0  
PC 1.00

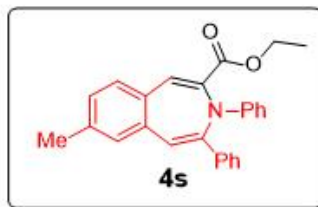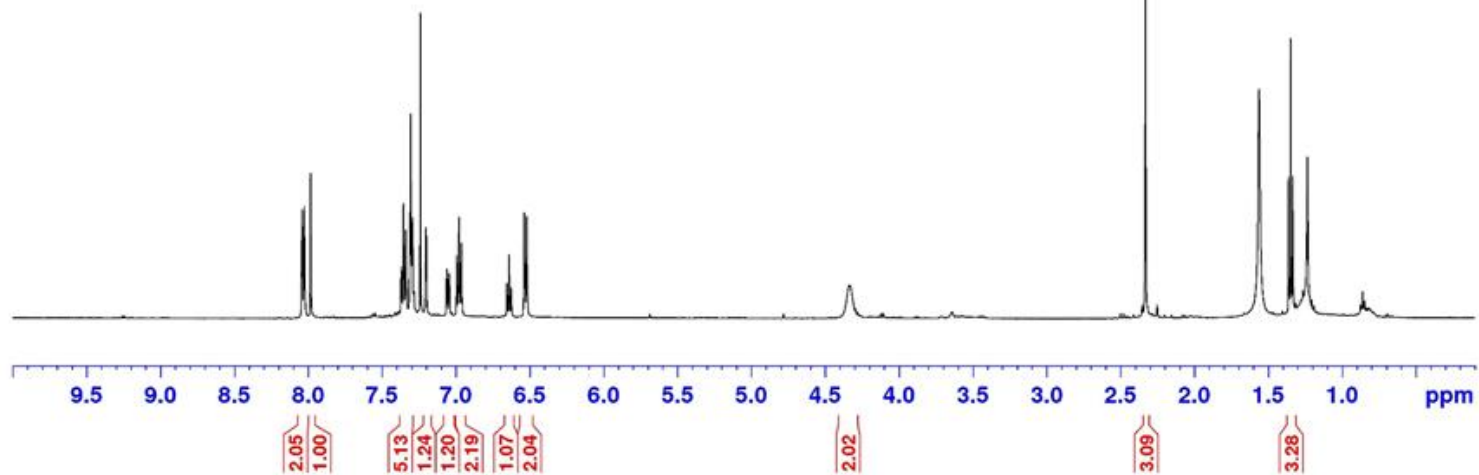

Solvent: CDCl<sub>3</sub>  
SFO1: 100 MHz

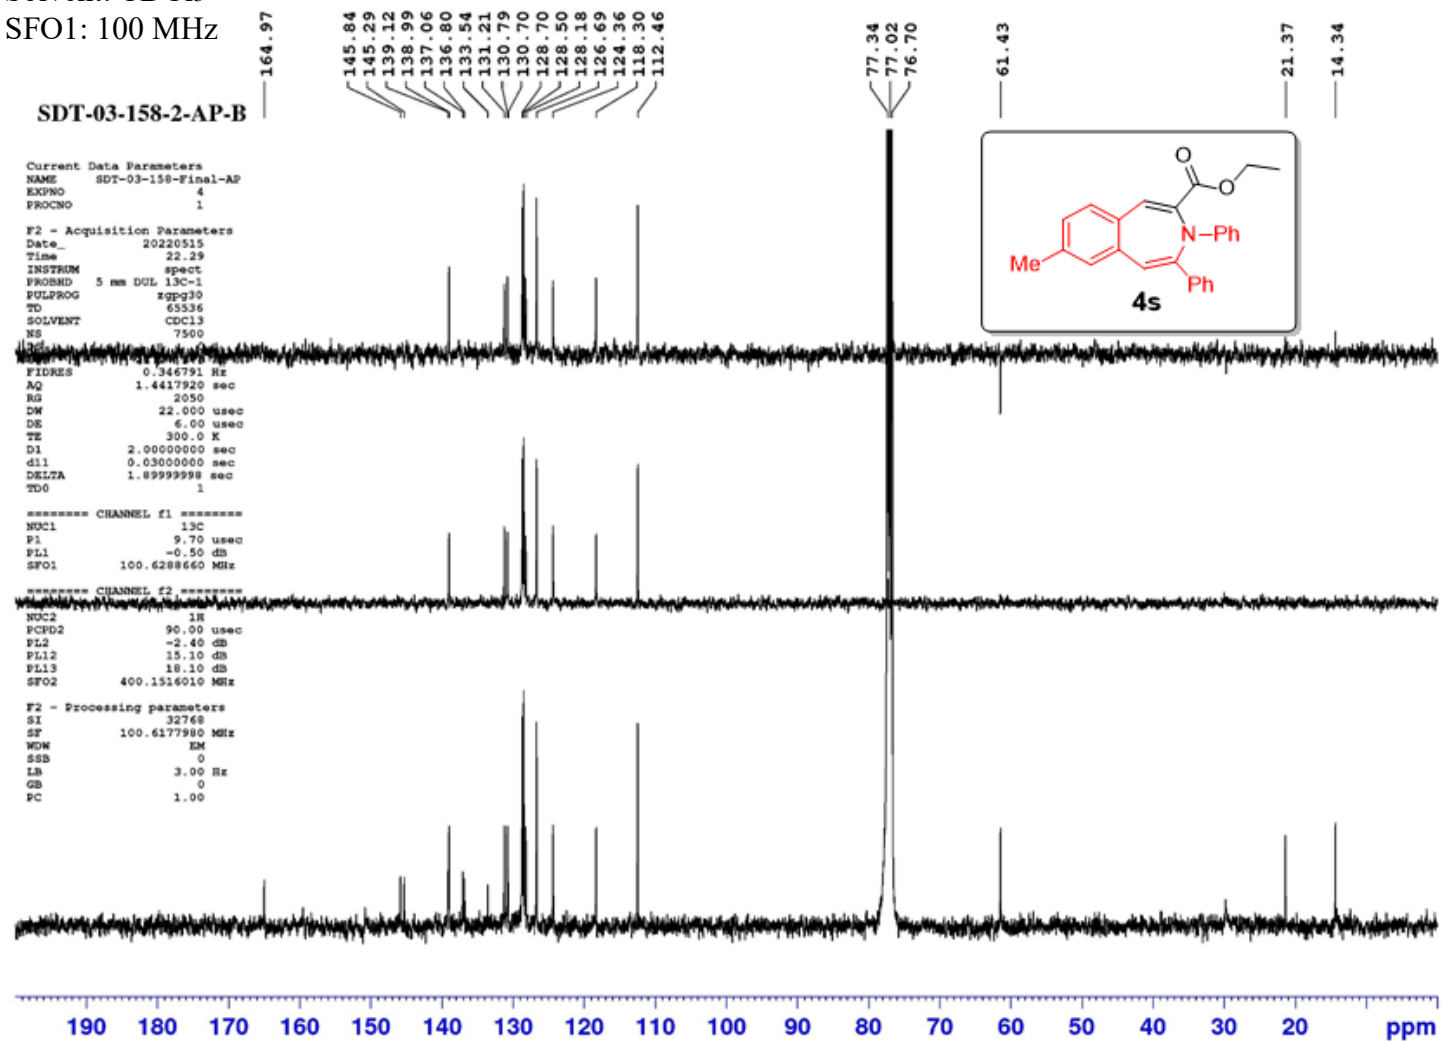

Solvent: CDCl<sub>3</sub>  
SFO1: 400 MHz

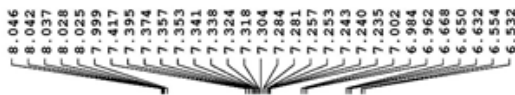

4.081  
4.064

2.067  
2.051  
2.034  
2.017  
2.000  
1.538  
0.940  
0.923

### SDT-03-93-IBu-AP

Current Data Parameters  
NAME SDT-03-93-IBu-AP  
EXPNO 1  
PROCNO 1

F2 - Acquisition Parameters  
Date\_ 20220309  
Time 16.28  
INSTRUM spect  
PROBHD 5 mm DUL 13C-1  
PULPROG zg30  
TD 32768  
SOLVENT CDCl<sub>3</sub>  
NS 7  
DS 0  
SWH 6410.256 Hz  
FIDRES 0.195625 Hz  
AQ 2.5559039 sec  
RG 724  
DW 78.000 usec  
DE 6.00 usec  
TE 300.0 K  
D1 2.00000000 sec  
TD0 1

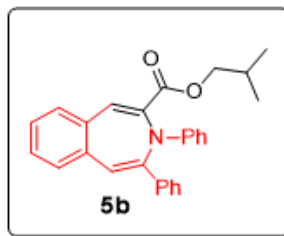

===== CHANNEL f1 =====  
NUC1 1H  
P1 10.00 usec  
PL1 -2.40 dB  
SFO1 400.1528010 MHz

F2 - Processing parameters  
SI 16384  
SF 400.1500168 MHz  
WDW EM  
SSB 0  
LB 0 Hz  
GB 0  
PC 1.00

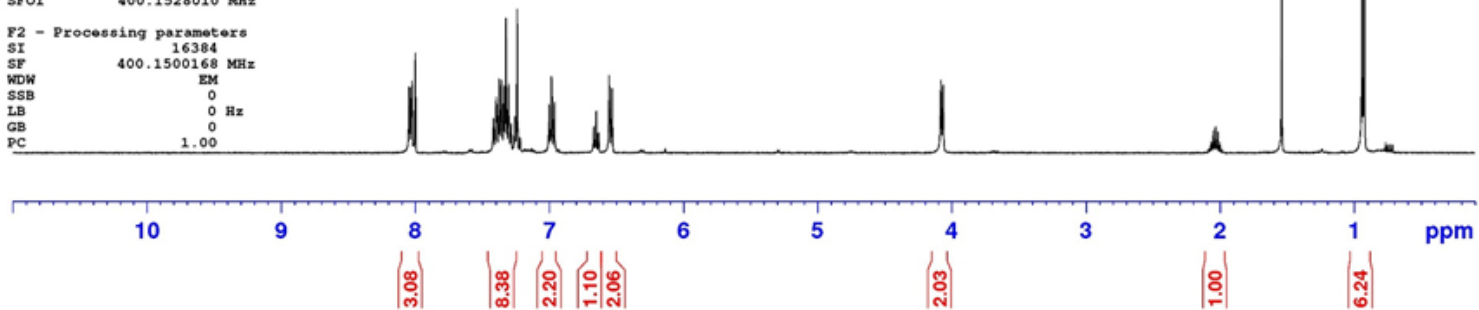

Solvent: CDCl<sub>3</sub>  
SFO1: 175 MHz

SDT-03-93-AP

Current Data Parameters  
NAME 3  
EXPNO 3  
PROCNO 1  
F2 - Processing parameters  
SI 131072  
SF 175.9505419 MHz  
WDW EM  
SSB 0  
LB 0.30 Hz  
GB 0  
PC 1.00

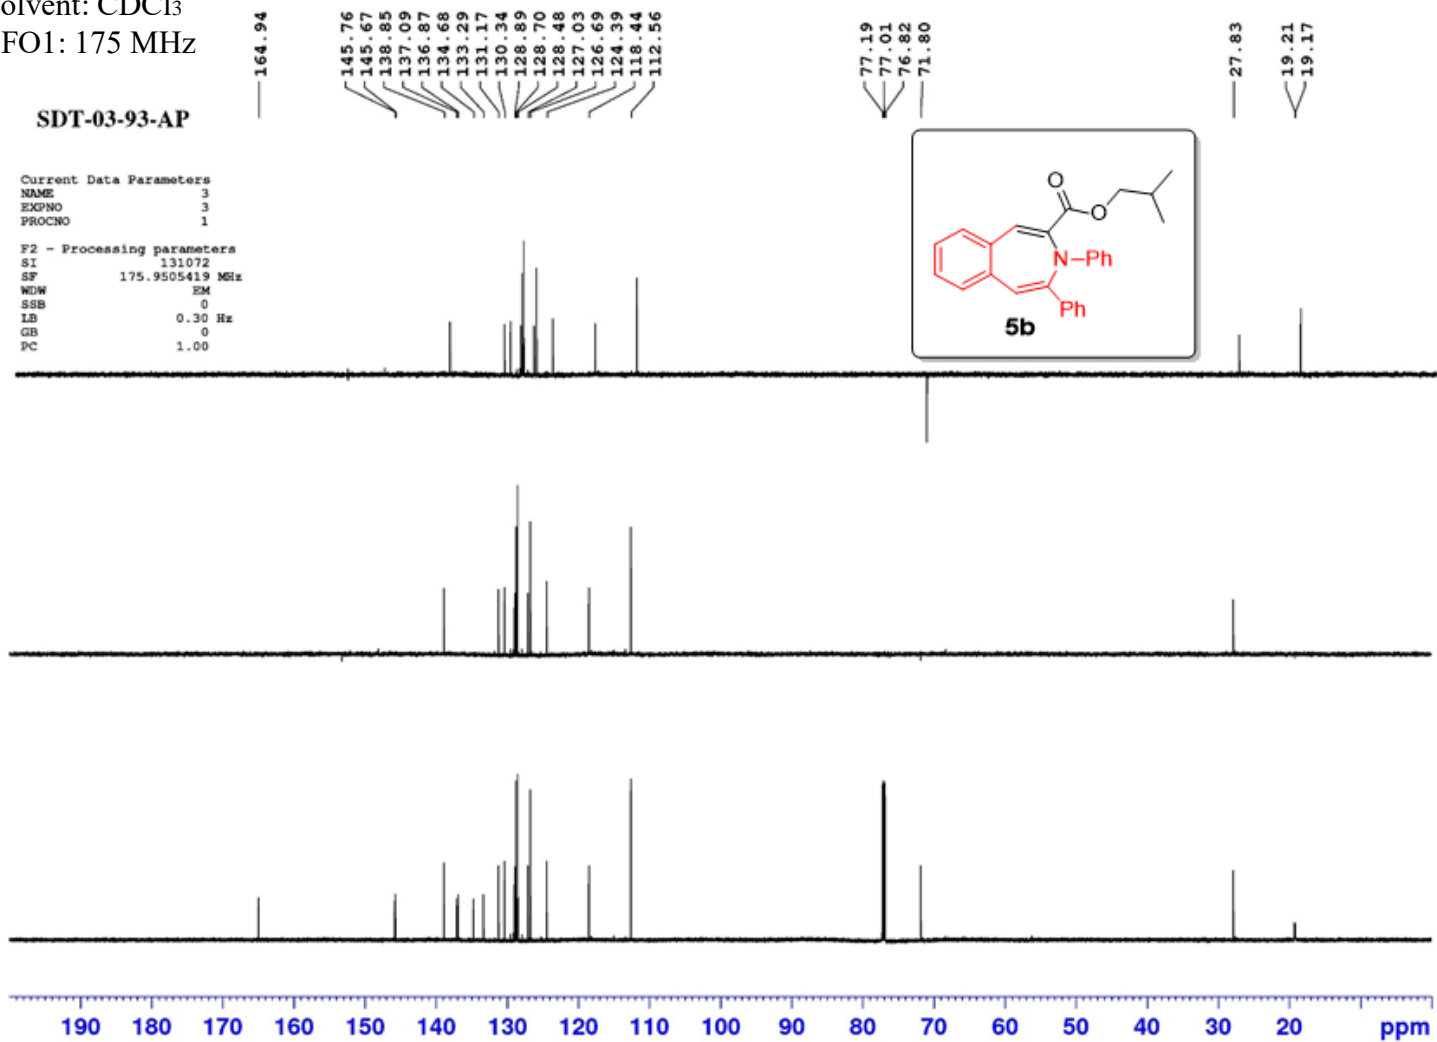

Solvent: CDCl<sub>3</sub>  
SFO1: 700 MHz

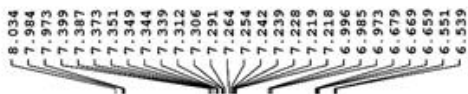

5.325

1.537

SDT-03-106-AP

Current Data Parameters  
NAME SDT-03-106-AP-H.fid  
EXPNO 1  
PROCNO 1

F2 - Processing parameters  
SI 65536  
SF 699.7430993 MHz  
WDW EM  
SSB 0  
LB 0.30 Hz  
GB 0  
PC 1.00

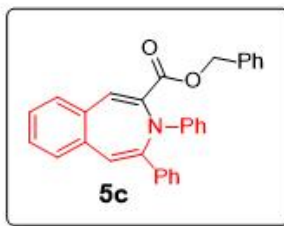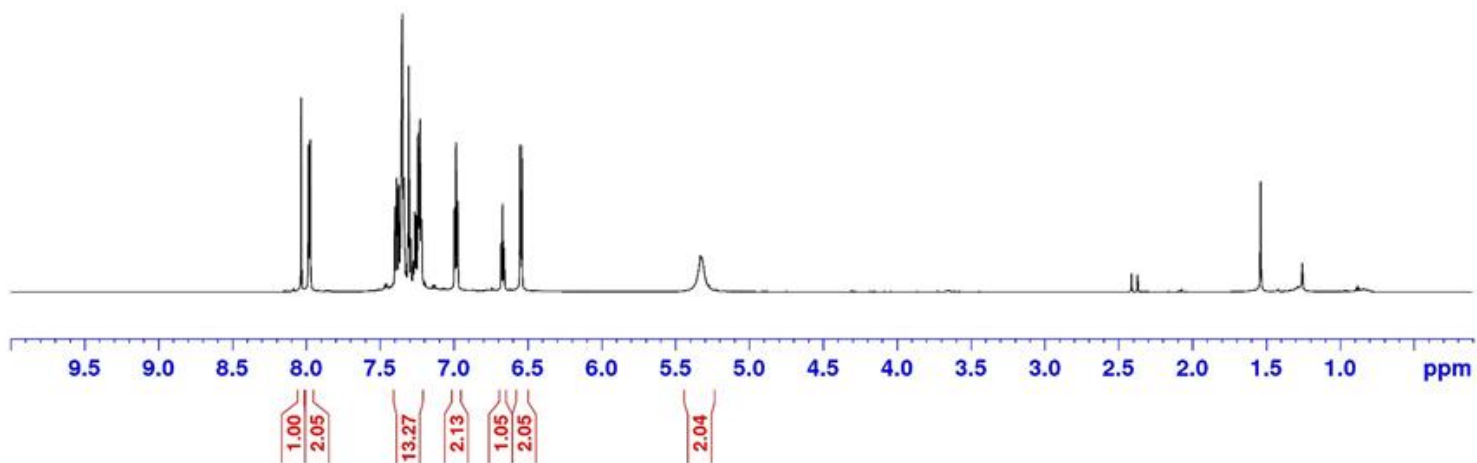

Solvent: CDCl<sub>3</sub>  
SFO1: 175 MHz

SDT-03-106-AP

Current Data Parameters  
NAME 3  
EXPNO 3  
PROCNO 1

F2 - Processing parameters  
SI 131072  
SF 175.9505411 MHz  
WDW EM  
SSB 0  
LB 0.30 Hz  
GB 0  
PC 1.00

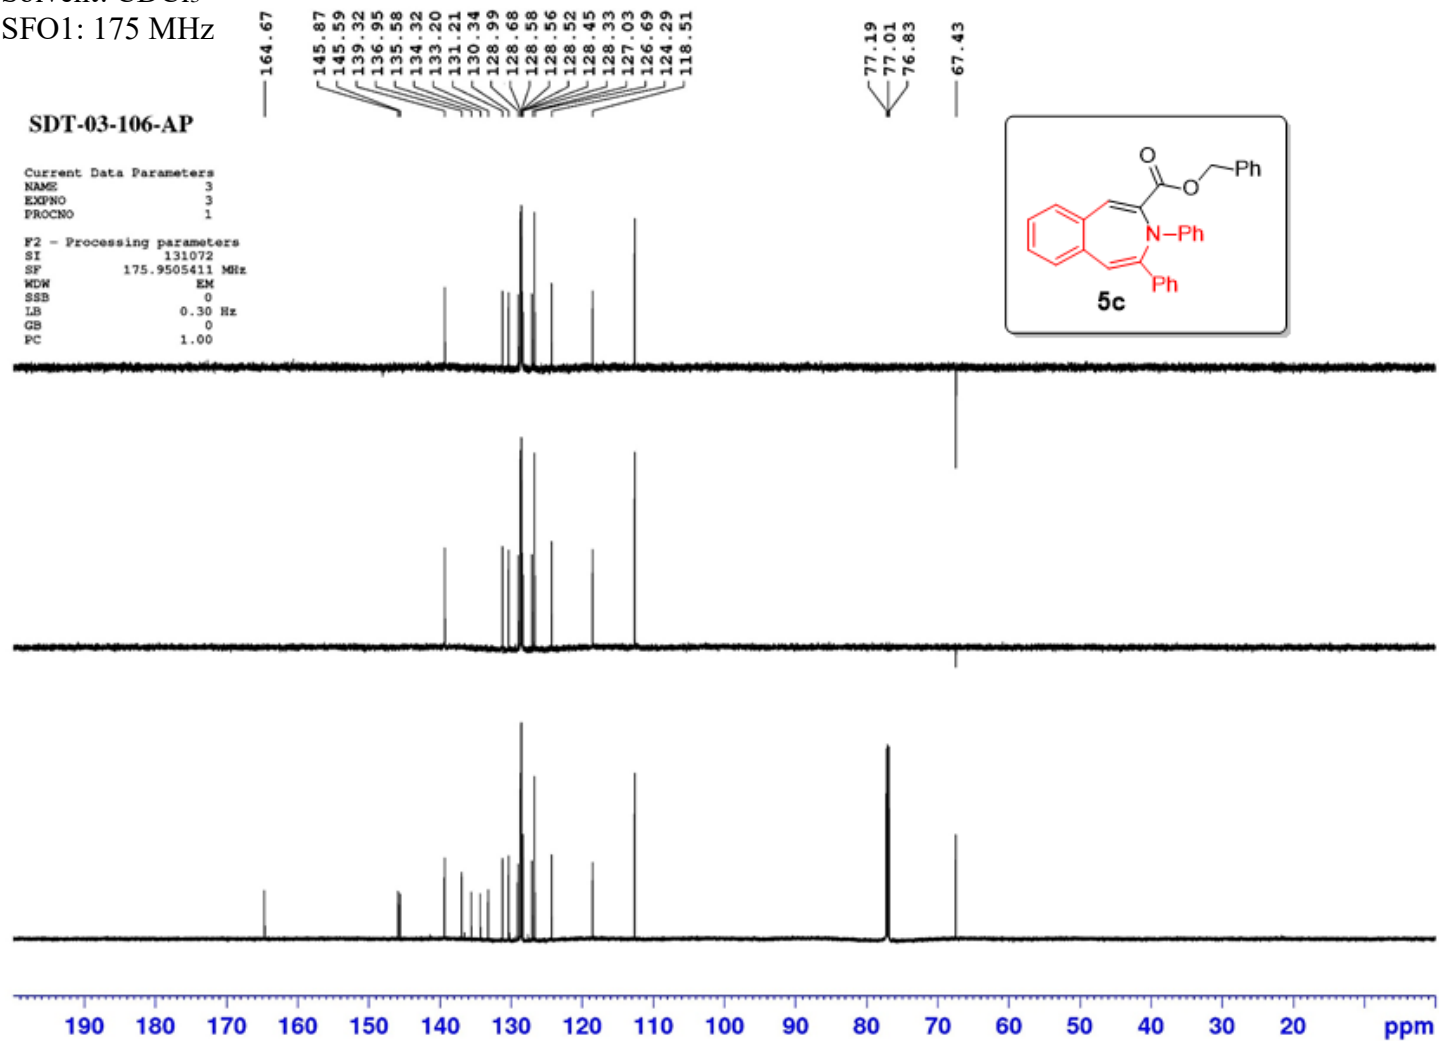



Solvent: CDCl<sub>3</sub>  
SFO1: 400 MHz

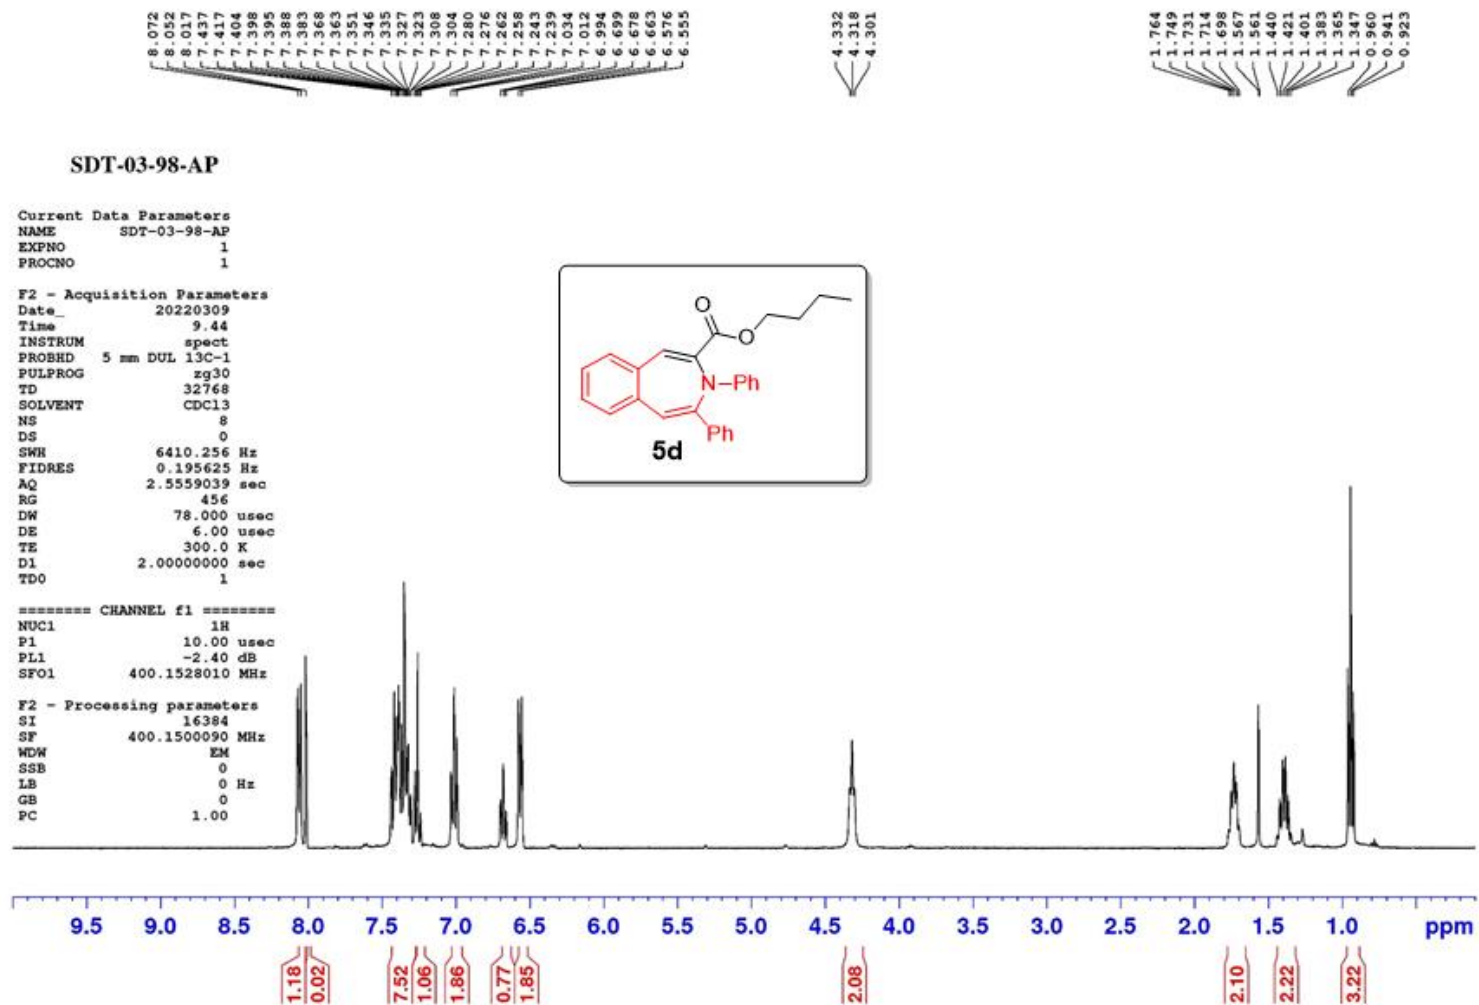

Solvent: CDCl<sub>3</sub>  
SFO1: 175 MHz

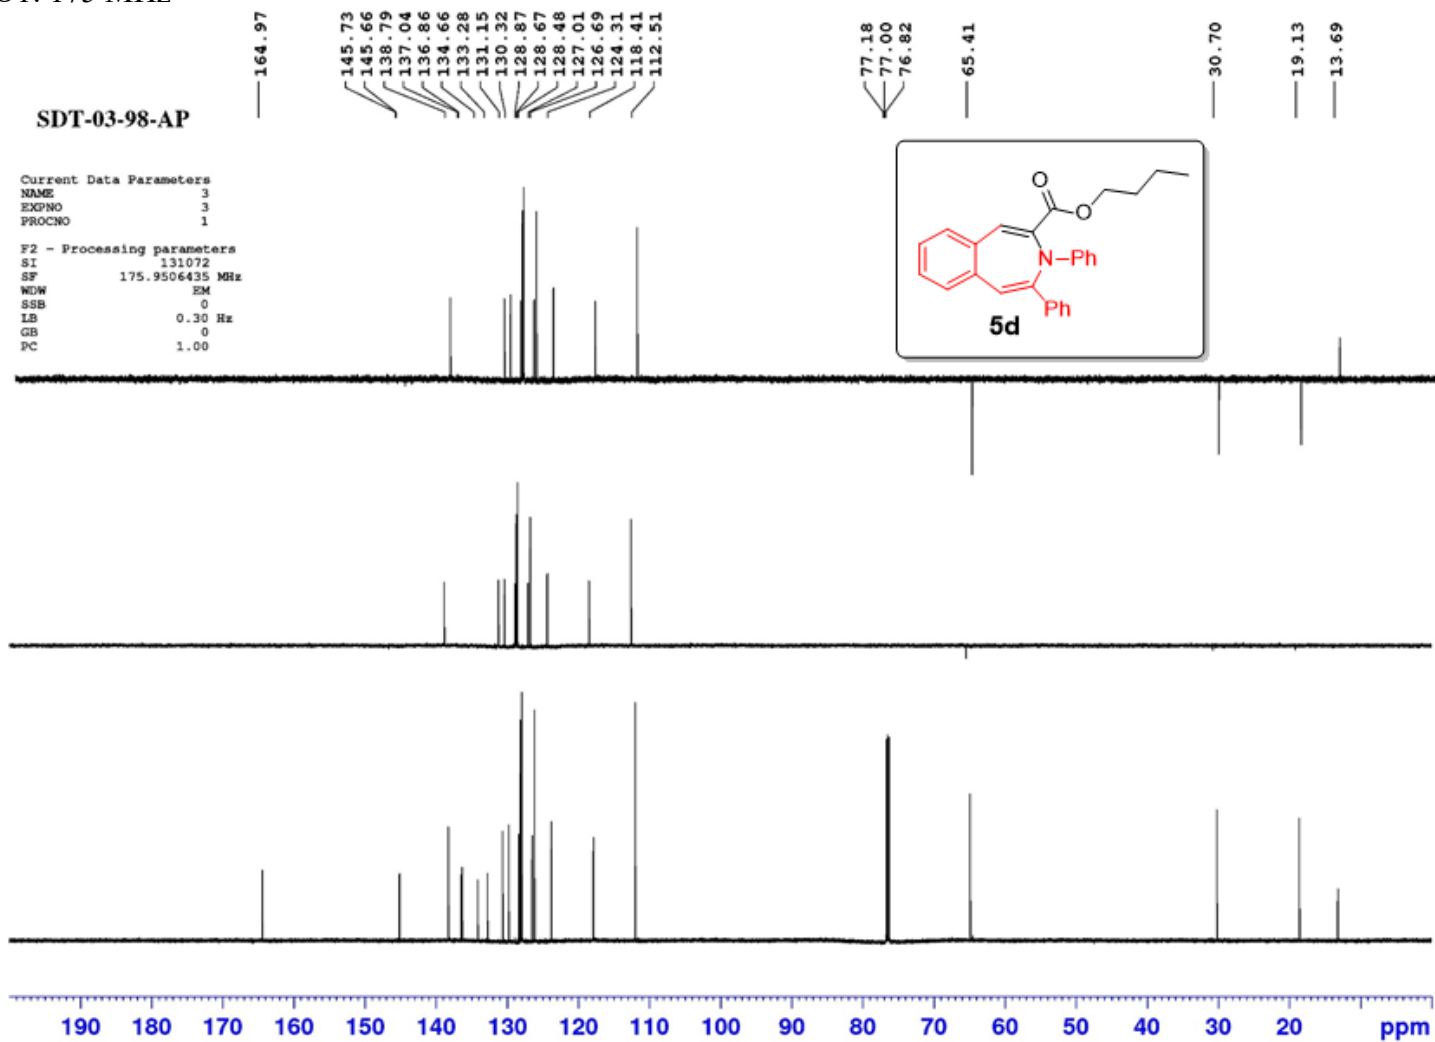

Solvent: CDCl<sub>3</sub>  
SFO1: 700 MHz

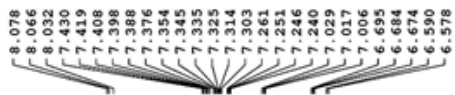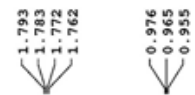

SDT-03-178-AP

Current Data Parameters  
NAME SDT-03-178-AP-H.fid  
EXPNO 1  
PROCNO 1

F2 - Processing parameters  
SI 65536  
SF 699.7430965 MHz  
WDW EM  
SSB 0  
LB 0.30 Hz  
GB 0  
PC 1.00

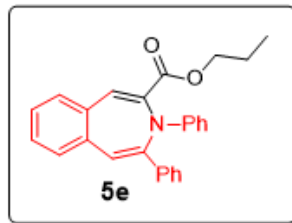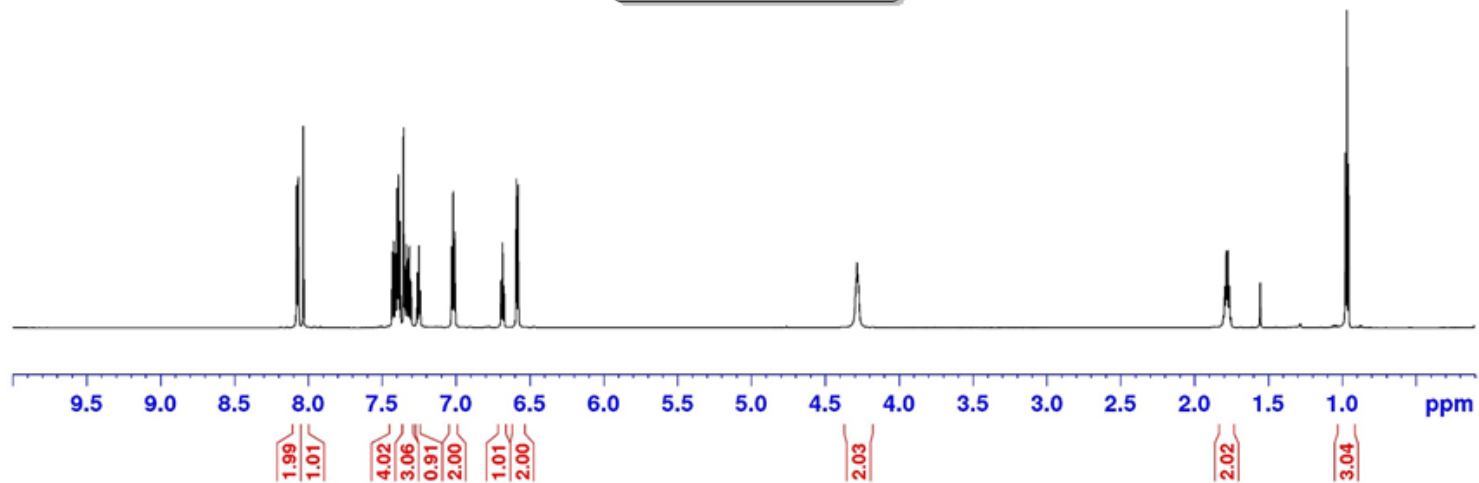

Solvent: CDCl<sub>3</sub>  
SFO1: 175 MHz

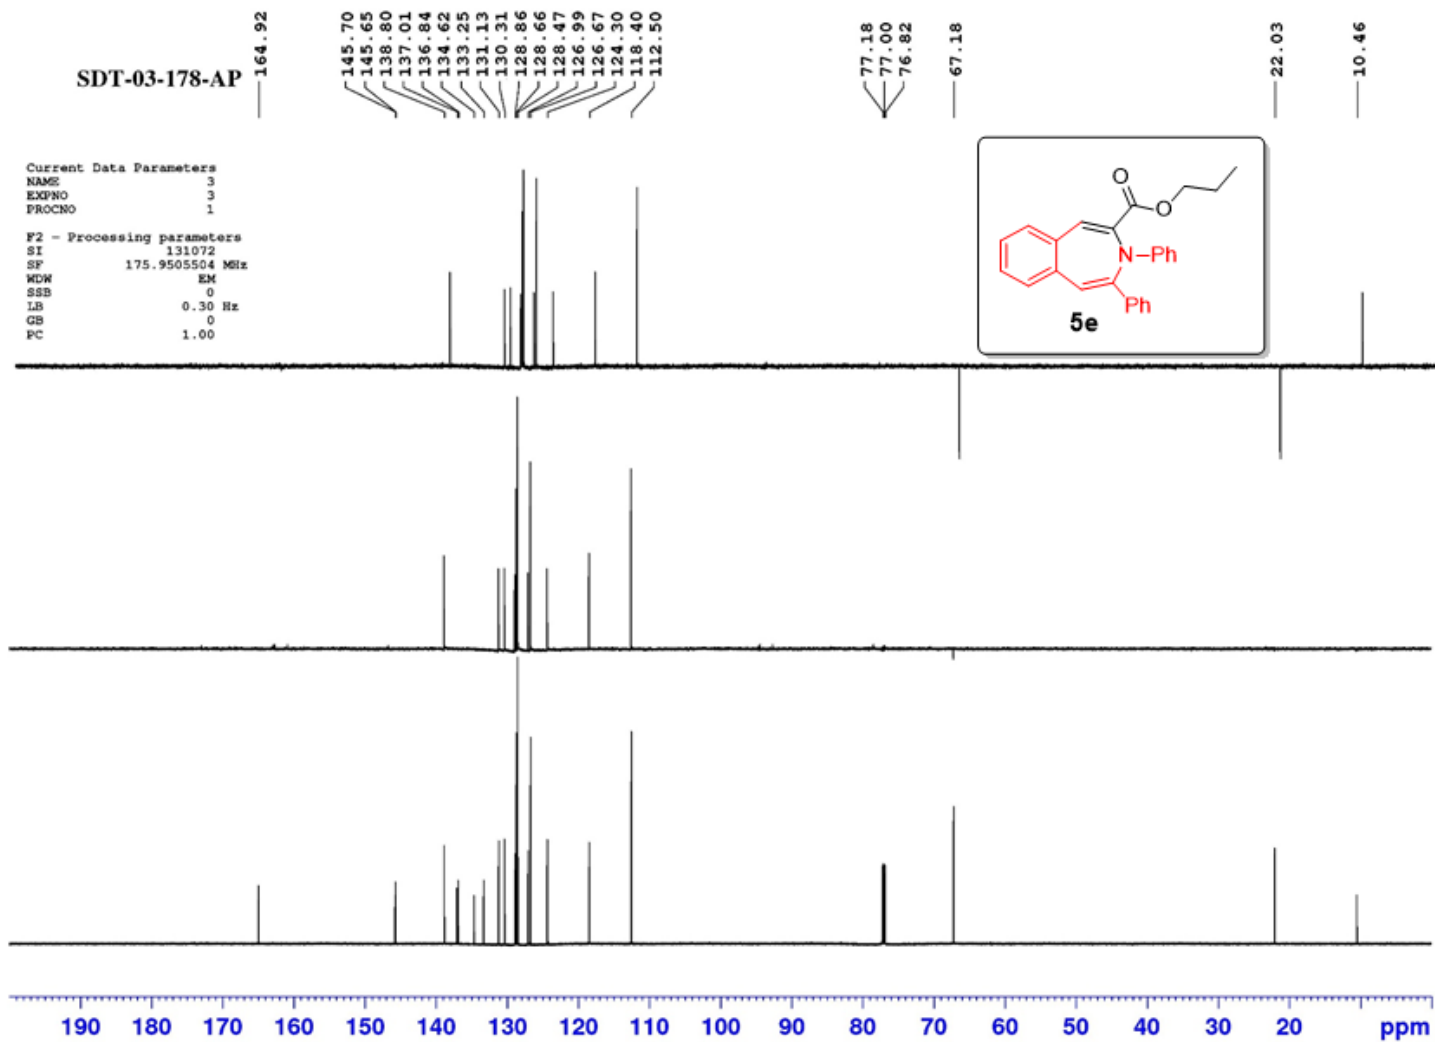

Solvent: CDCl<sub>3</sub>  
SFO1: 500 MHz

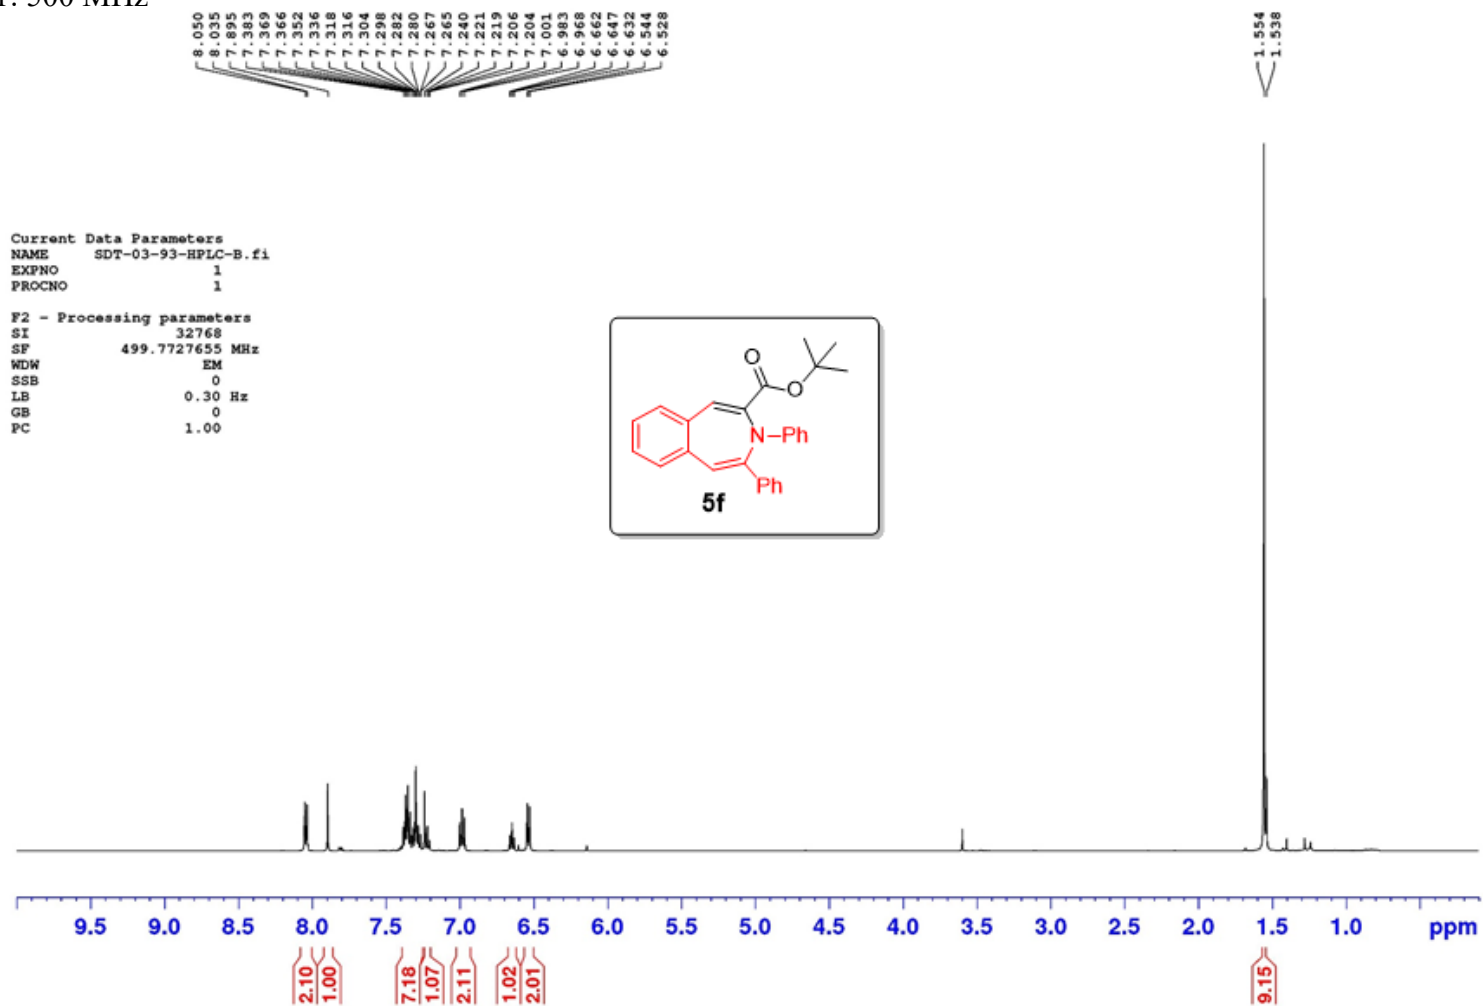

Solvent: CDCl<sub>3</sub>  
SFO1: 175 MHz

SDT-03-93-HPLC-B

Current Data Parameters  
NAME 3  
EXPNO 3  
PROCNO 1  
  
F2 - Processing parameters  
SI 131072  
SF 175.9505404 MHz  
WDW EM  
SSB 0  
LB 0.30 Hz  
GB 0  
PC 1.00

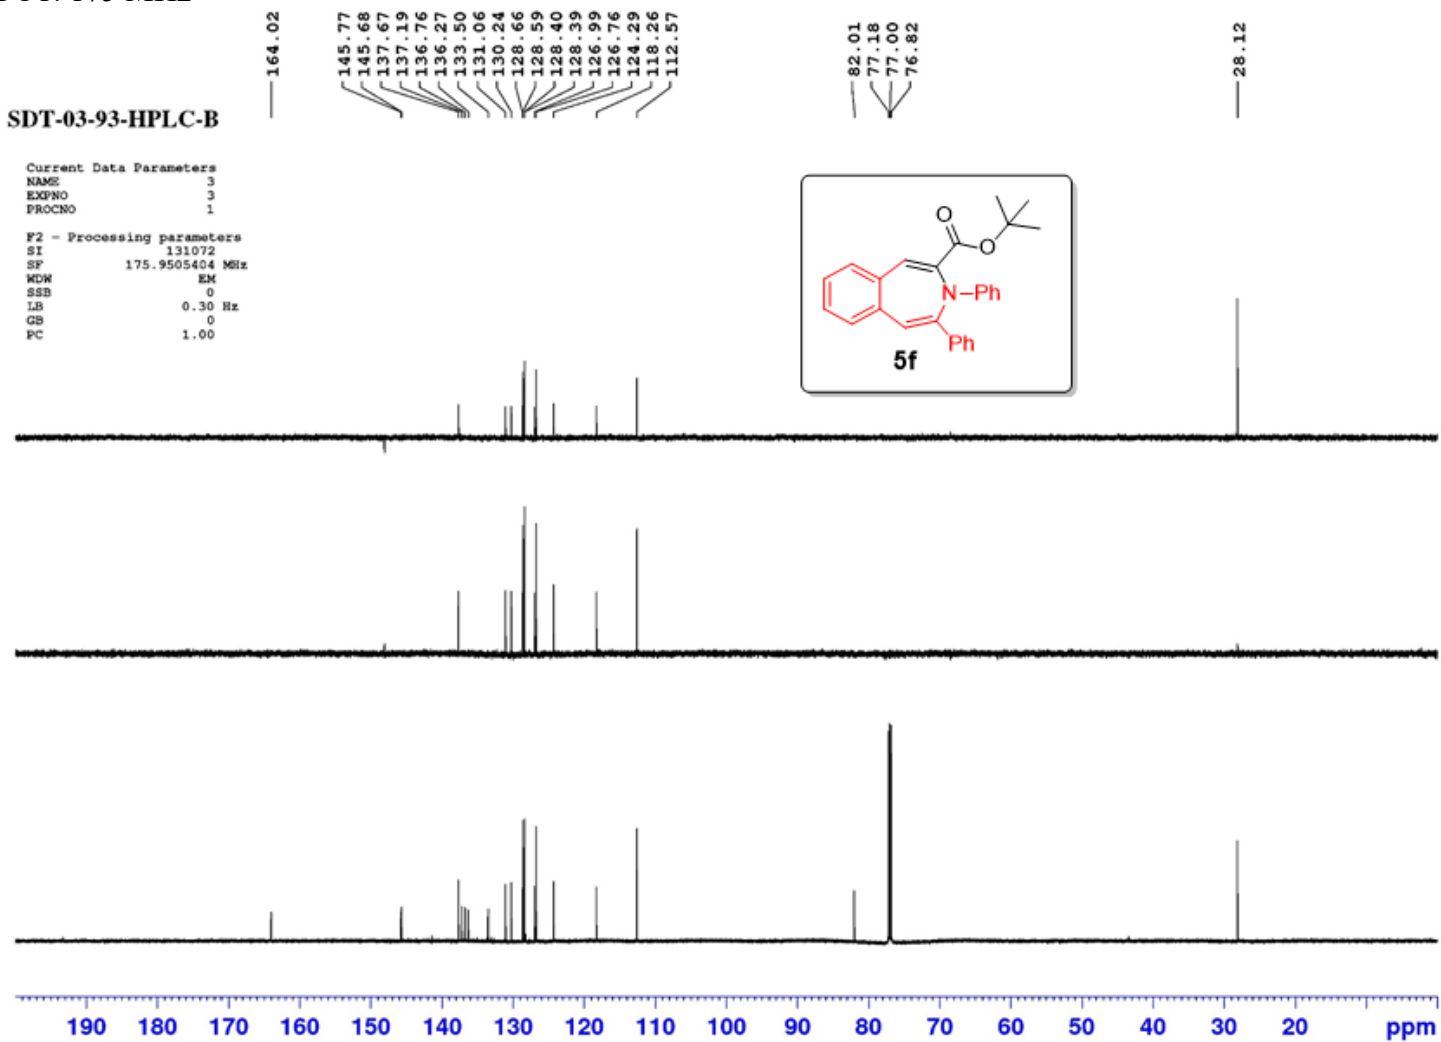

Solvent: CDCl<sub>3</sub>  
SFO1: 500 MHz

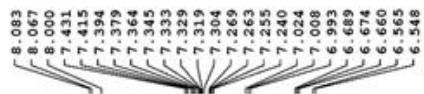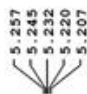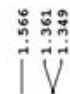

SDT-03-160-AP

Current Data Parameters  
NAME SDT-03-160-Final-AP  
EXPNO 1  
PROCNO 1

F2 - Processing parameters  
SI 32768  
SF 499.7727540 MHz  
WDW EM  
SSB 0  
LB 0.30 Hz  
GB 0  
PC 1.00

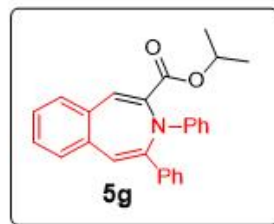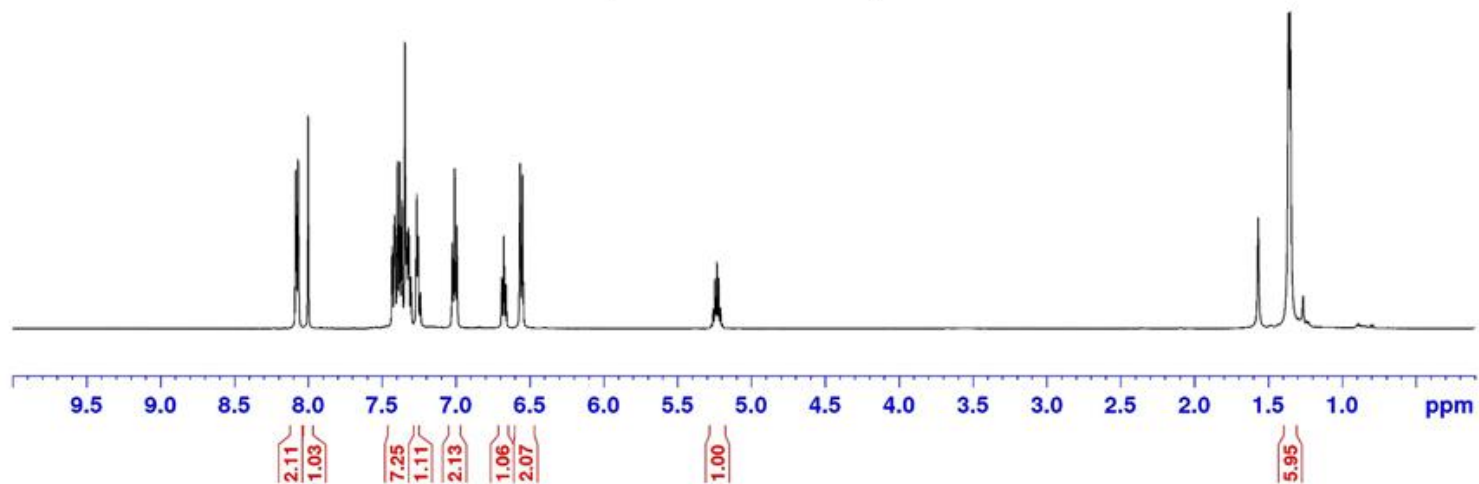

Solvent: CDCl<sub>3</sub>  
SFO1: 175 MHz

SDT-03-160-AP

Current Data Parameters  
NAME 3  
EXPNO 3  
PROCNO 1  
  
F2 - Processing parameters  
SI 131072  
SF 175.9505436 MHz  
WDW EM  
SSB 0  
LB 0.30 Hz  
GB 0  
PC 1.00

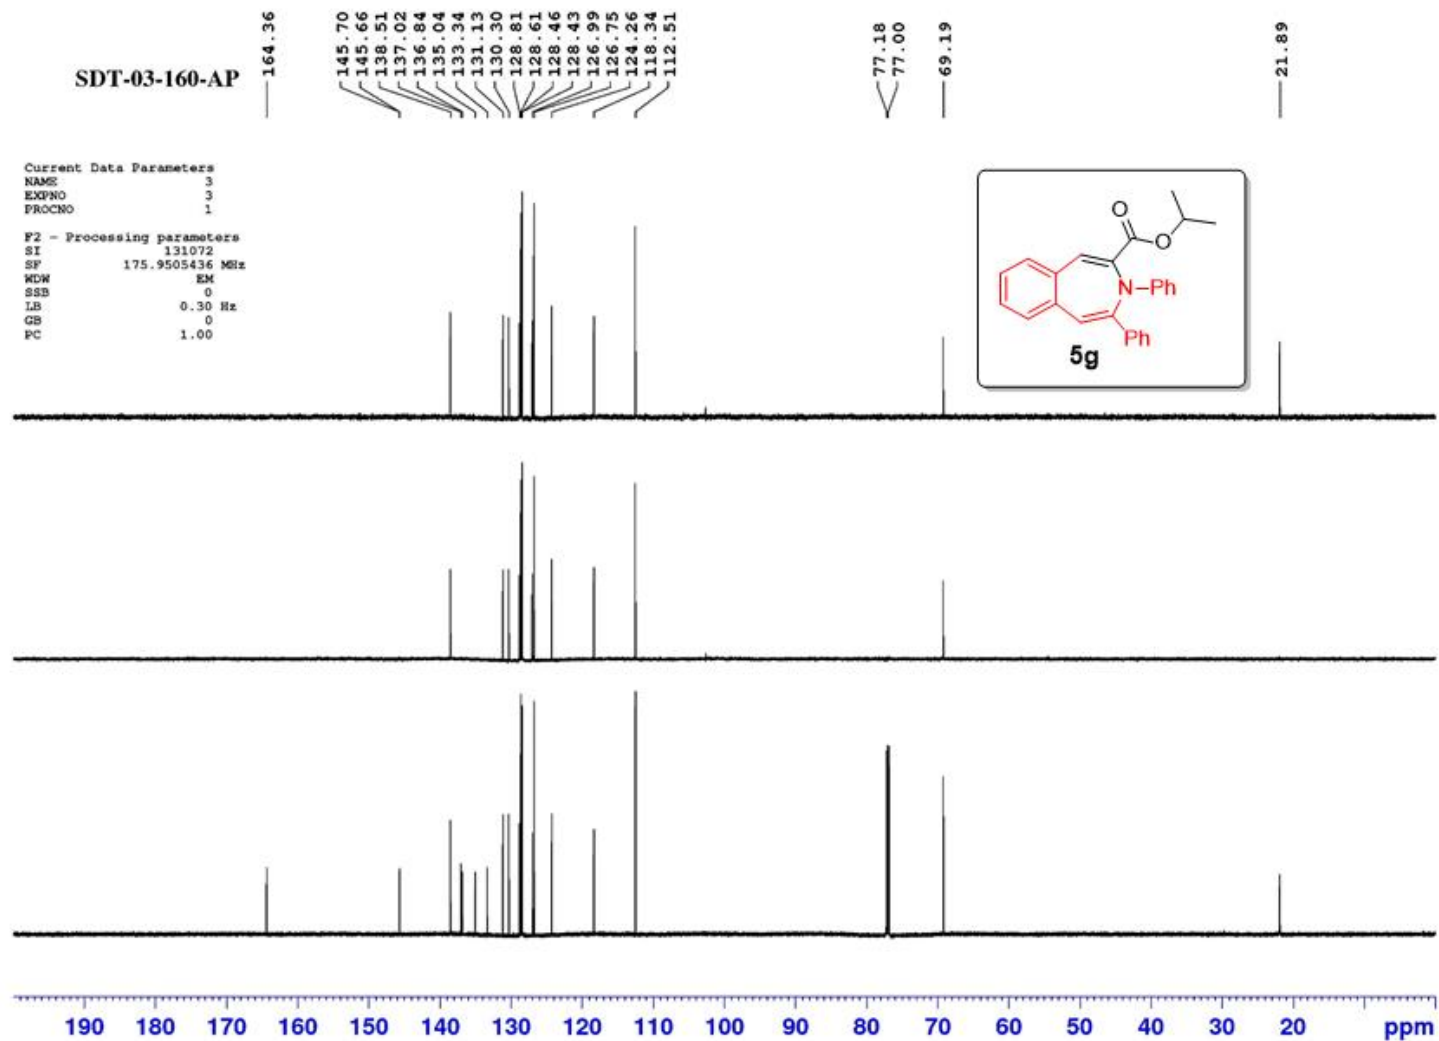



Solvent: CDCl<sub>3</sub>  
SFO1: 700 MHz

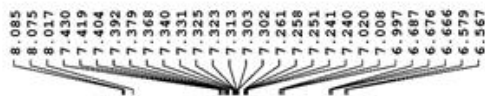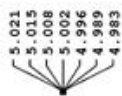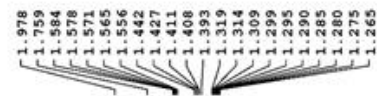

SDT-03-171-AP

Current Data Parameters  
NAME SDT-03-171-AP-H.fid  
EXPNO 1  
PROCNO 1

F2 - Processing parameters  
SI 65536  
SF 699.7430877 MHz  
WDW EM  
SSB 0  
LB 0.30 Hz  
GB 0  
PC 1.00

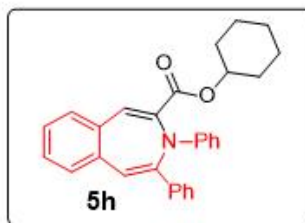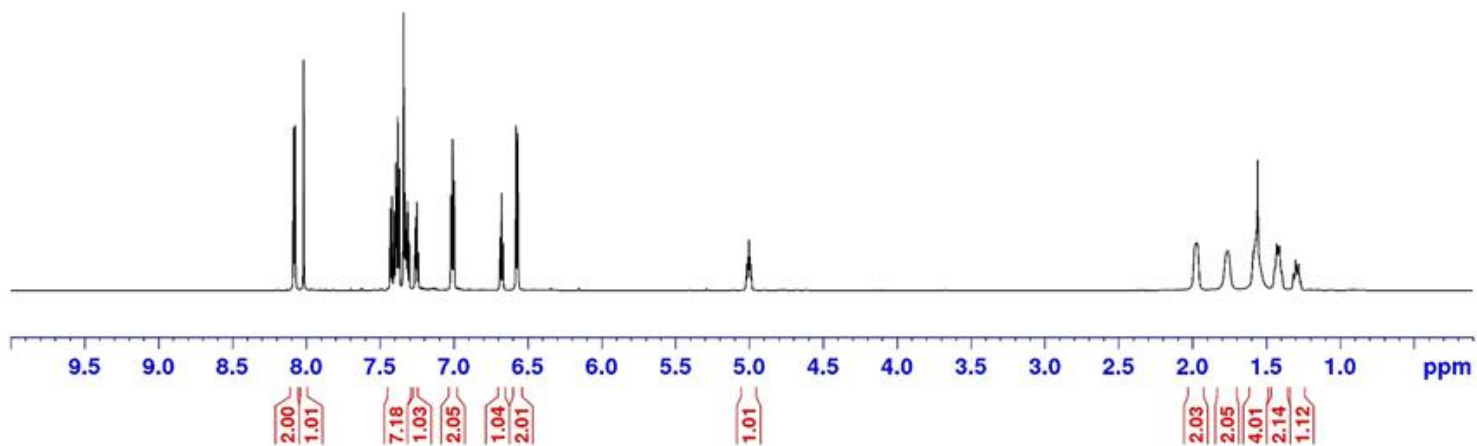

Solvent: CDCl<sub>3</sub>  
SFO1: 175 MHz

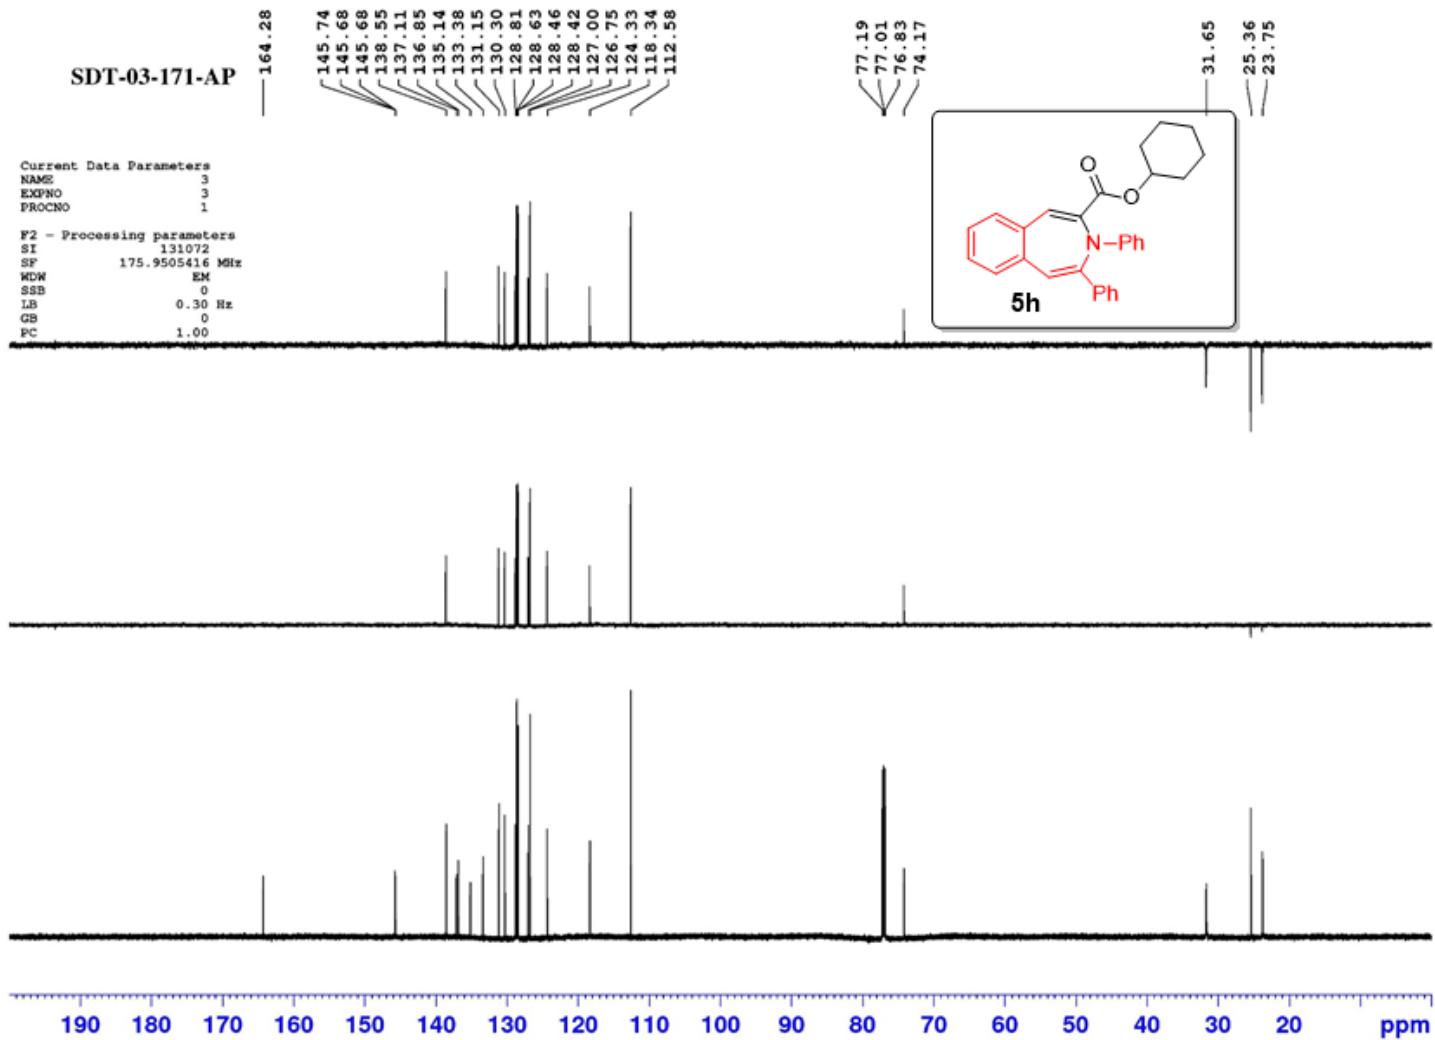

Solvent: CDCl<sub>3</sub>  
SFO1: 700 MHz

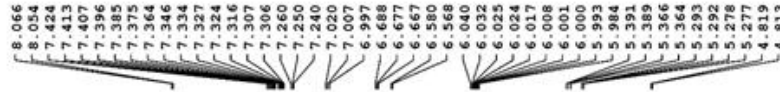

1.546

SDT-03-173-AP

Current Data Parameters  
NAME SDT-03-173-AP-H.fid  
EXPNO 1  
PROCNO 1

F2 - Processing parameters  
SI 65536  
SF 699.7430953 MHz  
WDW EM  
SSB 0  
LB 0.30 Hz  
GB 0  
PC 1.00

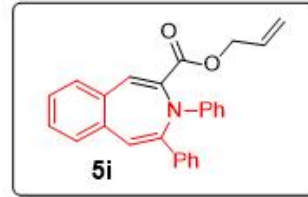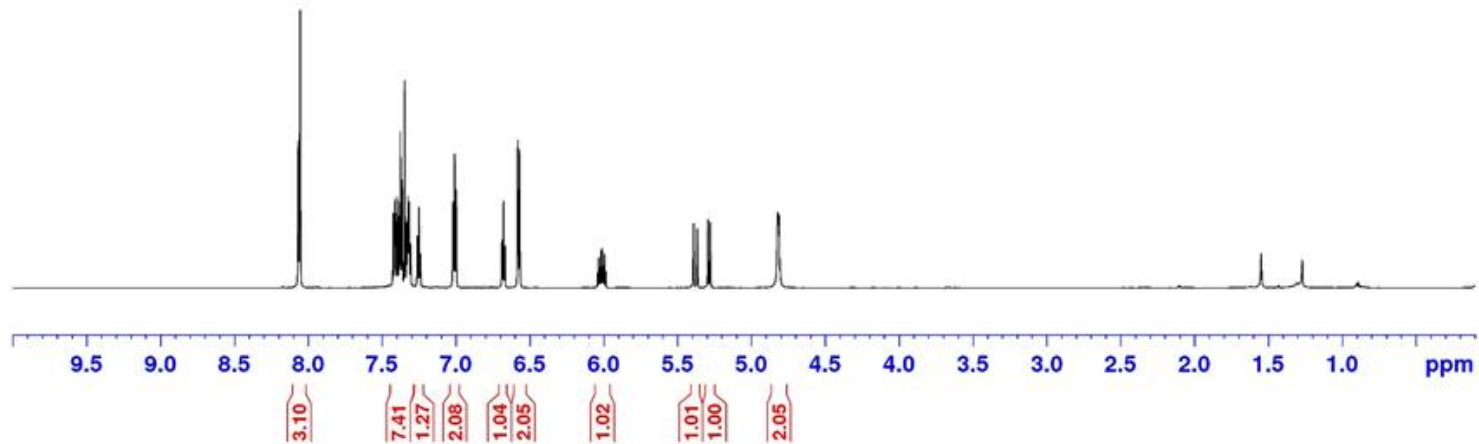

Solvent: CDCl<sub>3</sub>  
SFO1: 175 MHz

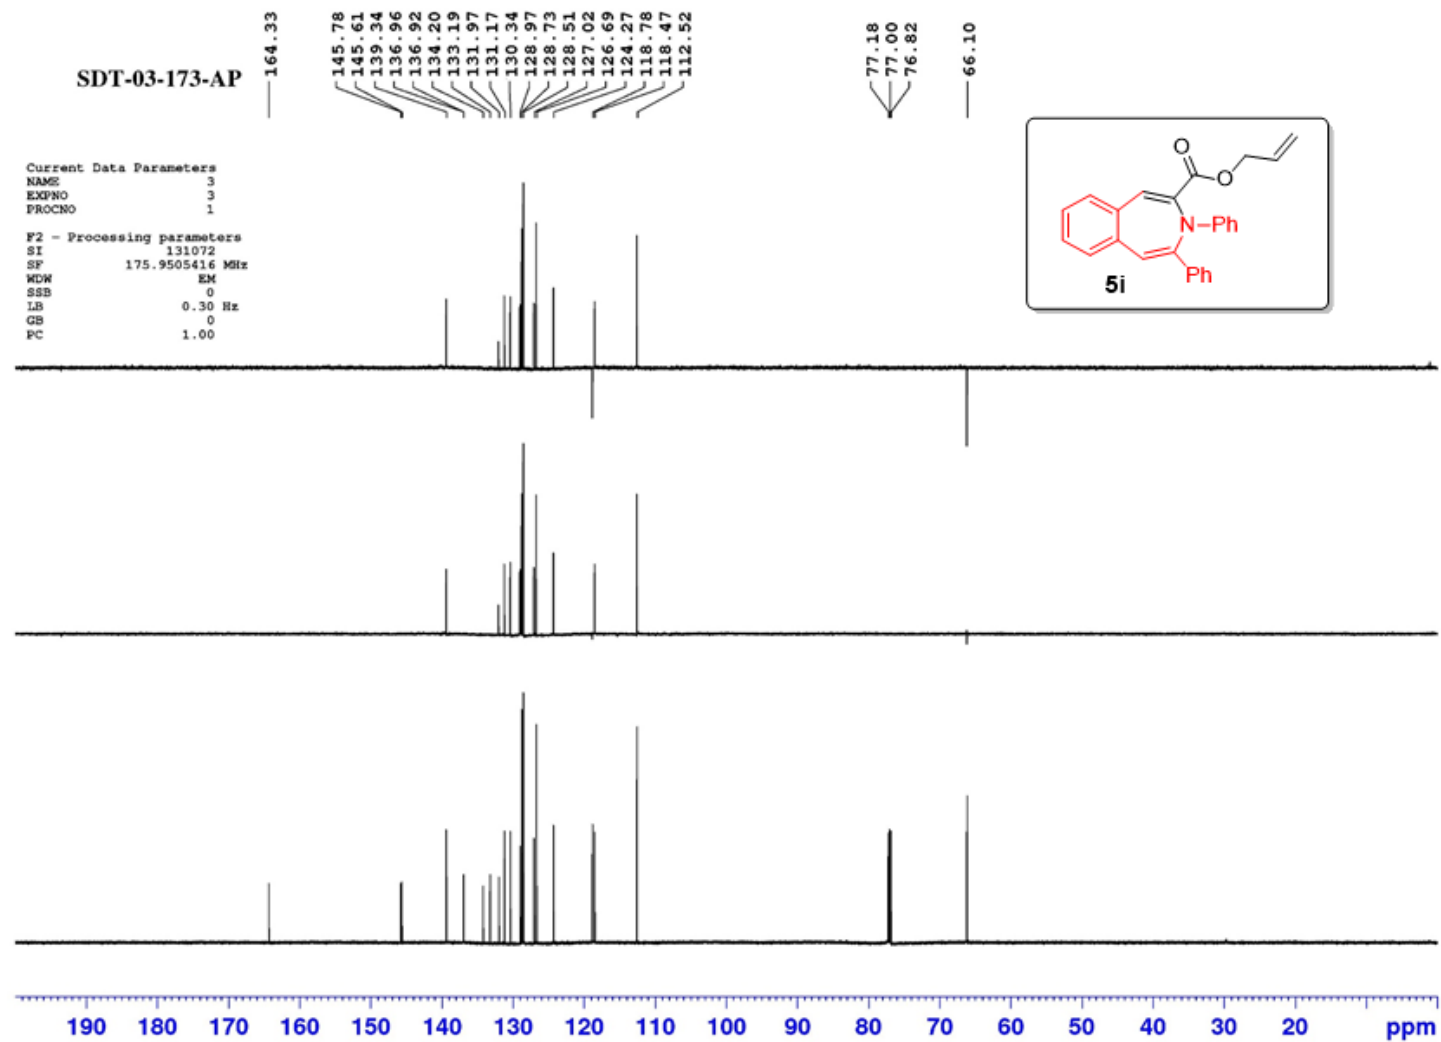

Solvent: CDCl<sub>3</sub>  
SFO1: 500 MHz

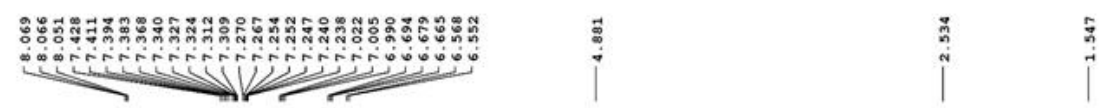

SDT-03-175-AP

Current Data Parameters  
NAME SDT-03-175-Final-AP  
EXPNO 1  
PROCNO 1

F2 - Processing parameters  
SI 32768  
SF 499.7727620 MHz  
WDW EM  
SSB 0  
LB 0.30 Hz  
GB 0  
PC 1.00

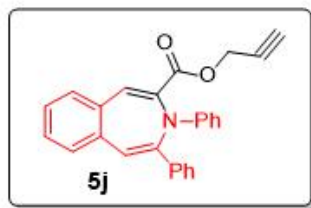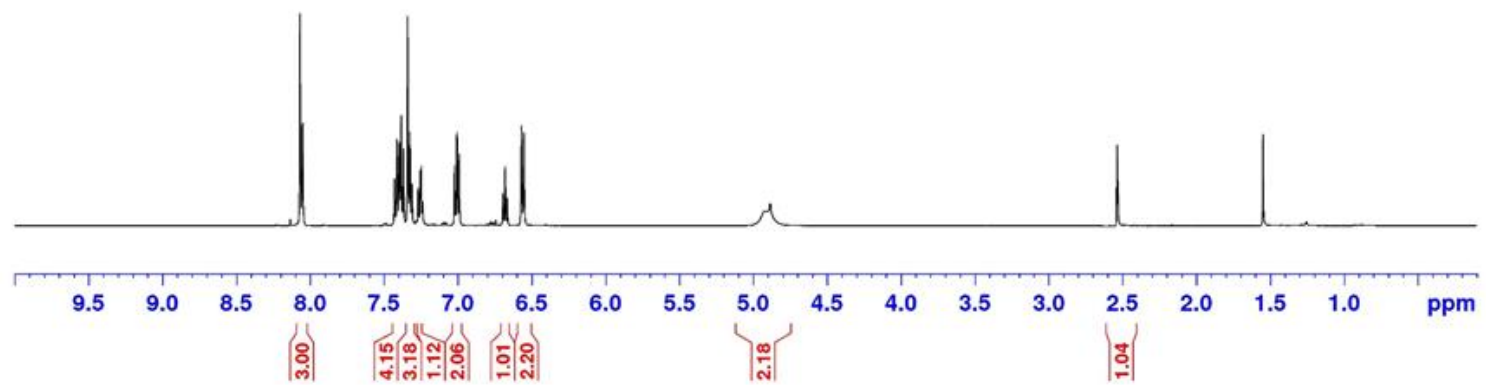

Solvent: CDCl<sub>3</sub>  
SFO1: 175 MHz

SDT-03-175-AP

163.84

145.87  
145.50  
140.18  
137.02  
136.89  
133.42  
133.02  
131.27  
130.39  
129.18  
128.79  
128.57  
128.56  
127.07  
126.69  
124.23  
118.62  
112.55

77.45  
77.18  
77.00  
76.82  
75.28

52.88

Current Data Parameters  
NAME SDT-03-175-AP-c.fid  
EXPNO 1  
PROCNO 1  
  
F2 - Processing parameters  
SI 131072  
SF 175.9505420 MHz  
WDW EM  
SSB 0  
LB 0.30 Hz  
GB 0  
PC 1.00

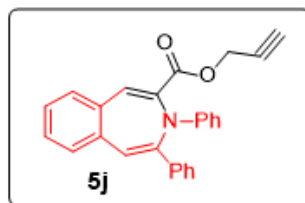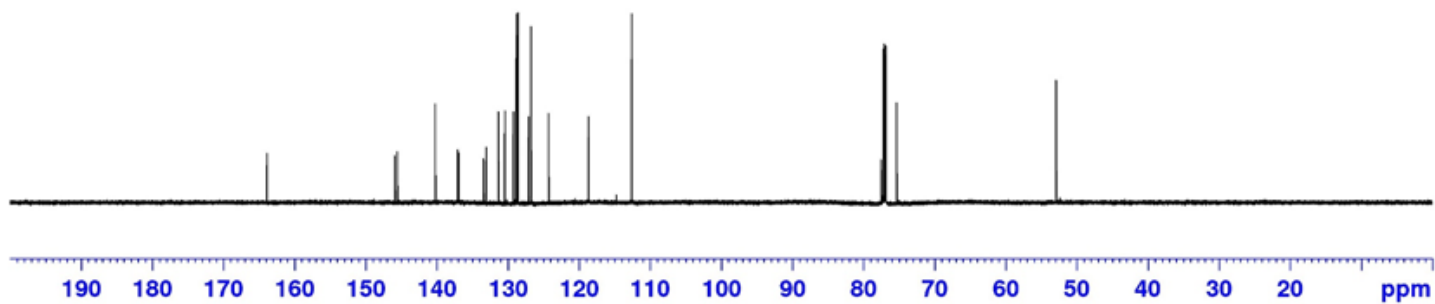

Solvent: CDCl<sub>3</sub>  
SFO1: 500 MHz

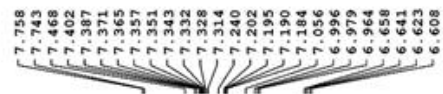

SDT-03-191-AP

Current Data Parameters  
NAME SDT-03-191-AP.fid  
EXPNO 1  
PROCNO 1

F2 - Processing parameters  
SI 32768  
SF 499.7727656 MHz  
WDW EM  
SSB 0  
LB 0.30 Hz  
GB 0  
PC 1.00

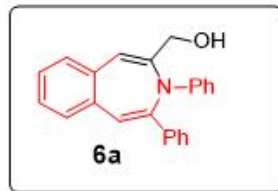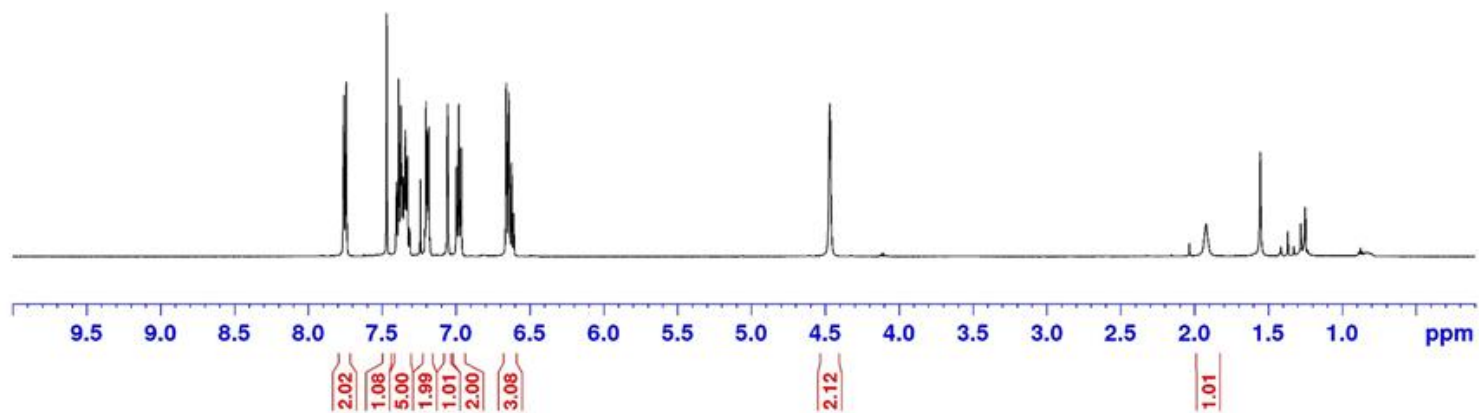

Solvent: CDCl<sub>3</sub>  
SFO1: 175 MHz

SDT-03-191-AP

Current Data Parameters  
NAME 3  
EXPNO 3  
PROCNO 1  
  
F2 - Processing parameters  
SI 131072  
SF 175.9505388 MHz  
WDW EM  
SSB 0  
LB 0.30 Hz  
GB 0  
PC 1.00

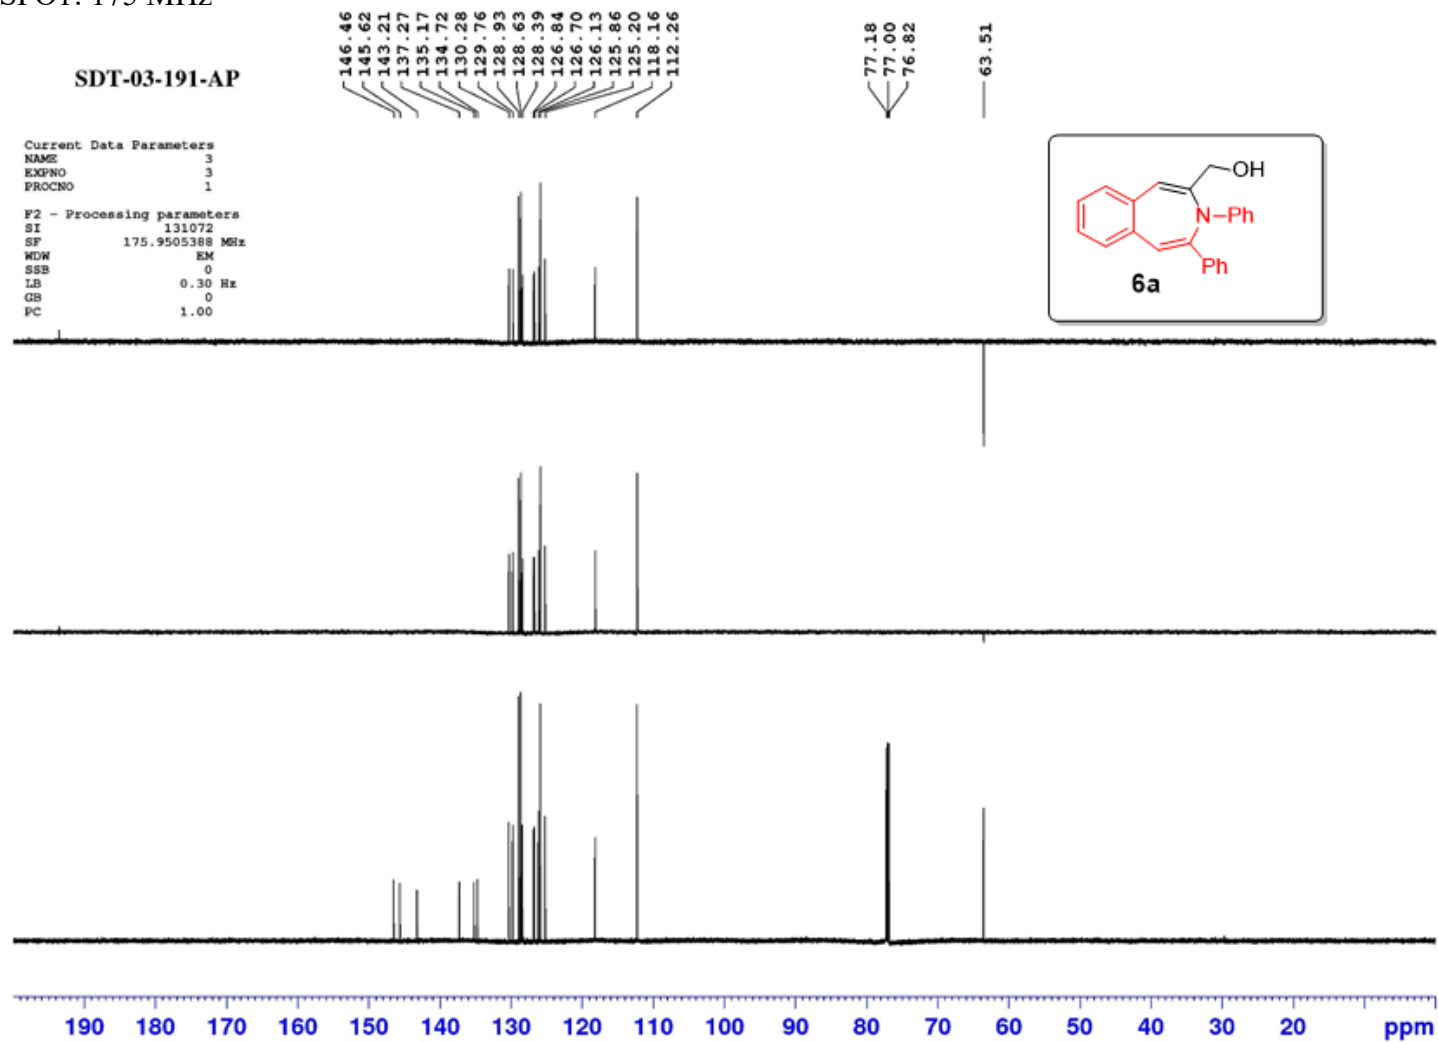



Solvent: CDCl<sub>3</sub>  
SFO1: 700 MHz

SDT-03-193-AP

Current Data Parameters  
NAME SDT-03-193-AP-H.fid  
EXPNO 1  
PROCNO 1

F2 - Processing parameters  
SI 65536  
SF 699.7431042 MHz  
WDW EM  
SSB 0  
LB 0.30 Hz  
GB 0  
PC 1.00

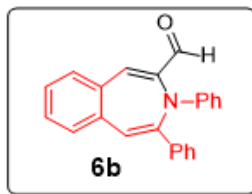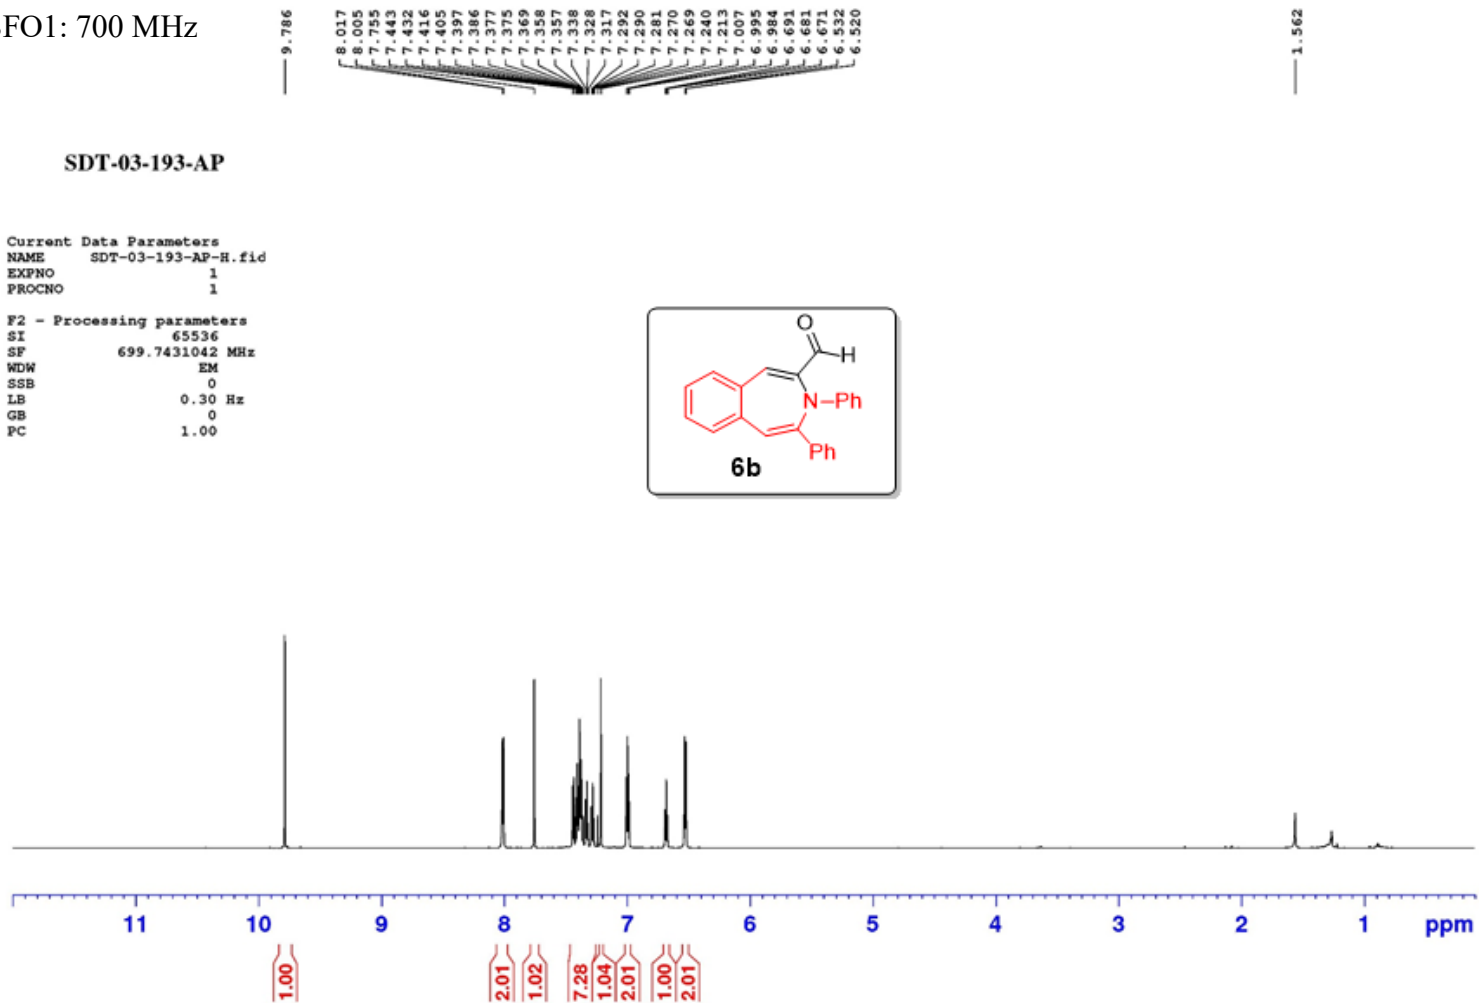

Solvent: CDCl<sub>3</sub>  
SFO1: 175 MHz

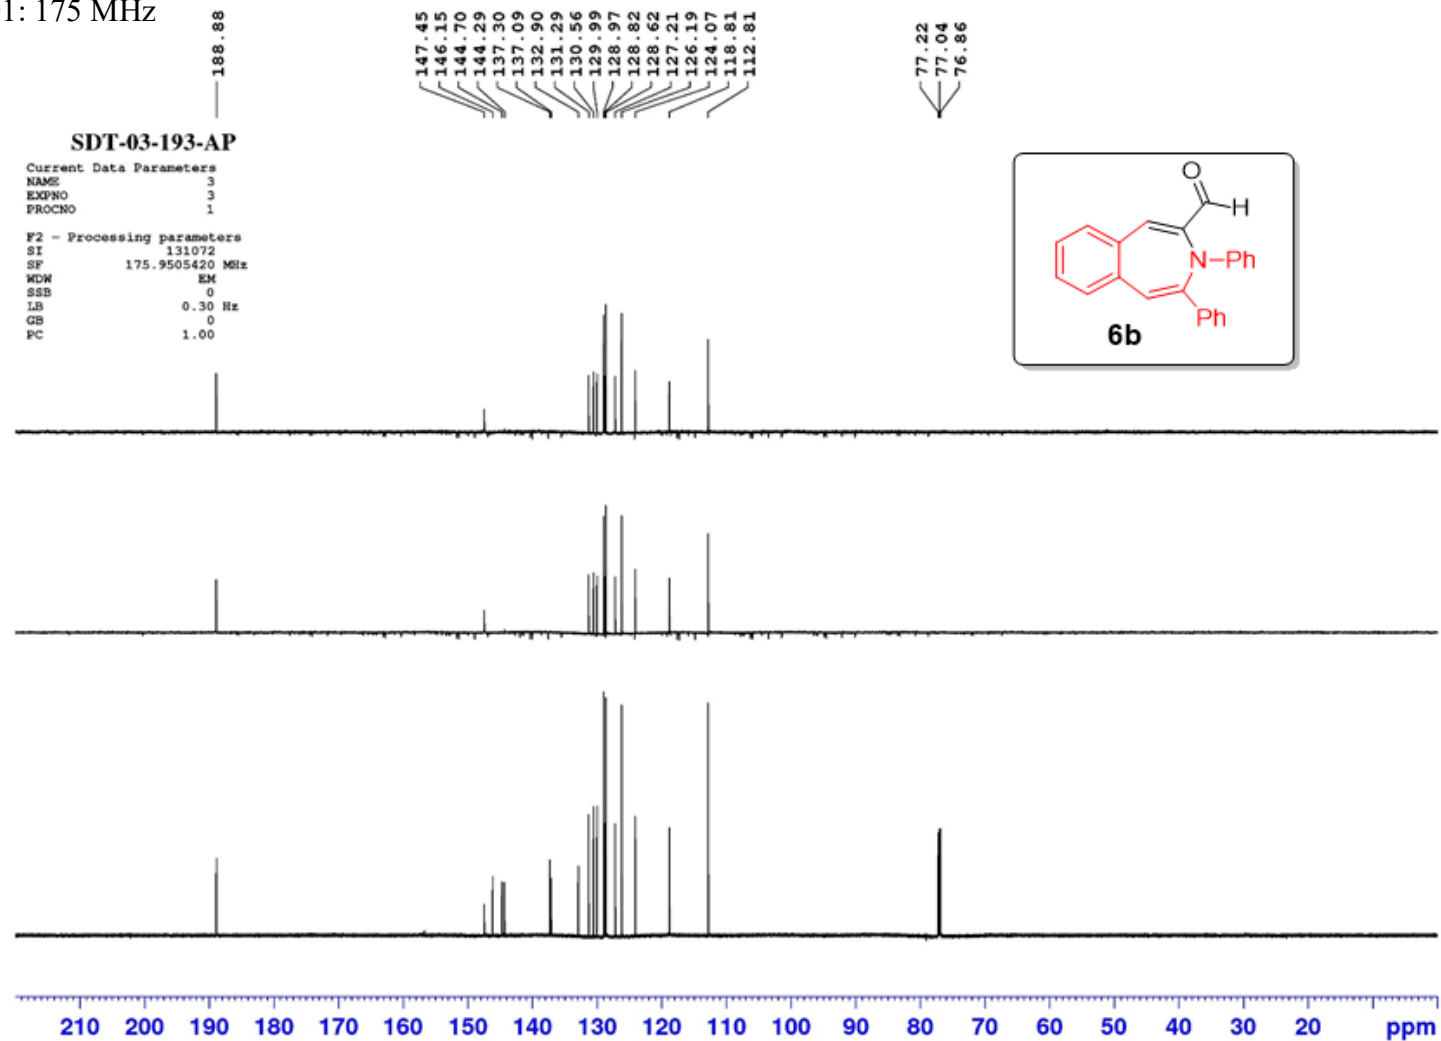

Solvent: CDCl<sub>3</sub>  
SFO1: 700 MHz

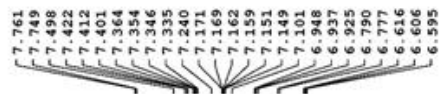

SDT-03-195-AP

Current Data Parameters  
NAME SDT-03-195-AP-H.fid  
EXPNO 1  
PROCNO 1

F2 - Processing parameters  
SI 65536  
SF 699.7431018 MHz  
WDW EM  
SSB 0  
LB 0.30 Hz  
GB 0  
PC 1.00

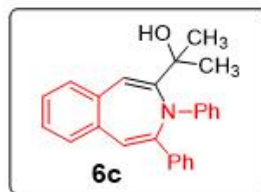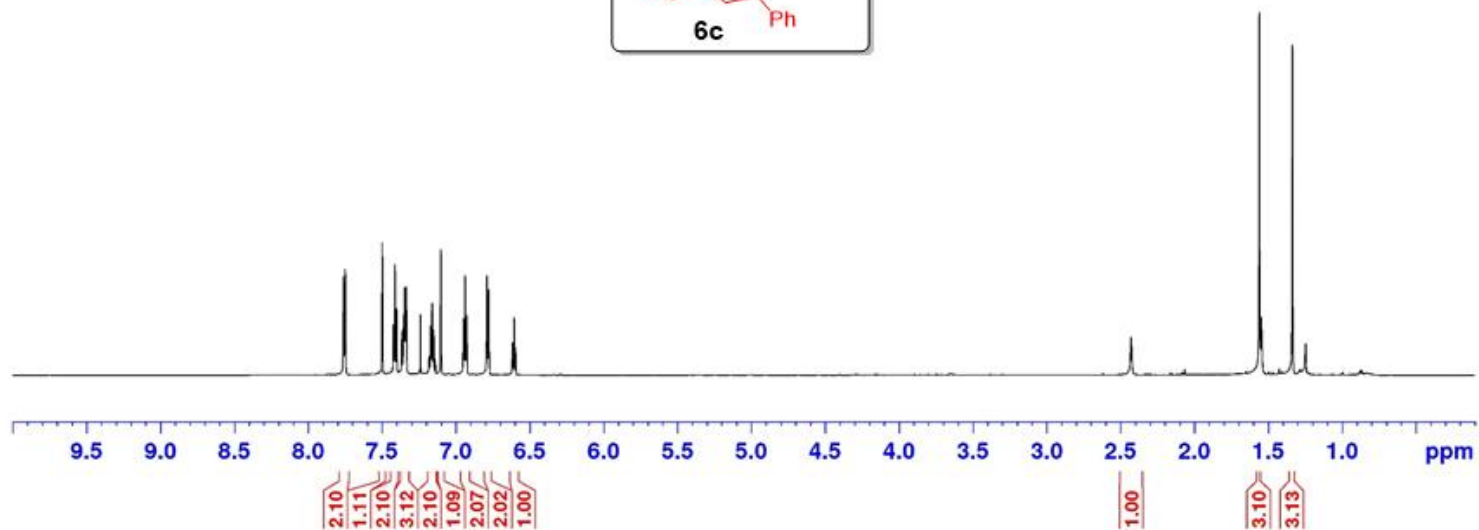

Solvent: CDCl<sub>3</sub>  
SFO1: 175 MHz

SDT-03-195-AP

Current Data Parameters  
NAME 3  
EXPNO 3  
PROCNO 1  
  
F2 - Processing parameters  
SI 131072  
SF 175.9505419 MHz  
WDW EM  
SSB 0  
LB 0.30 Hz  
GB 0  
PC 1.00

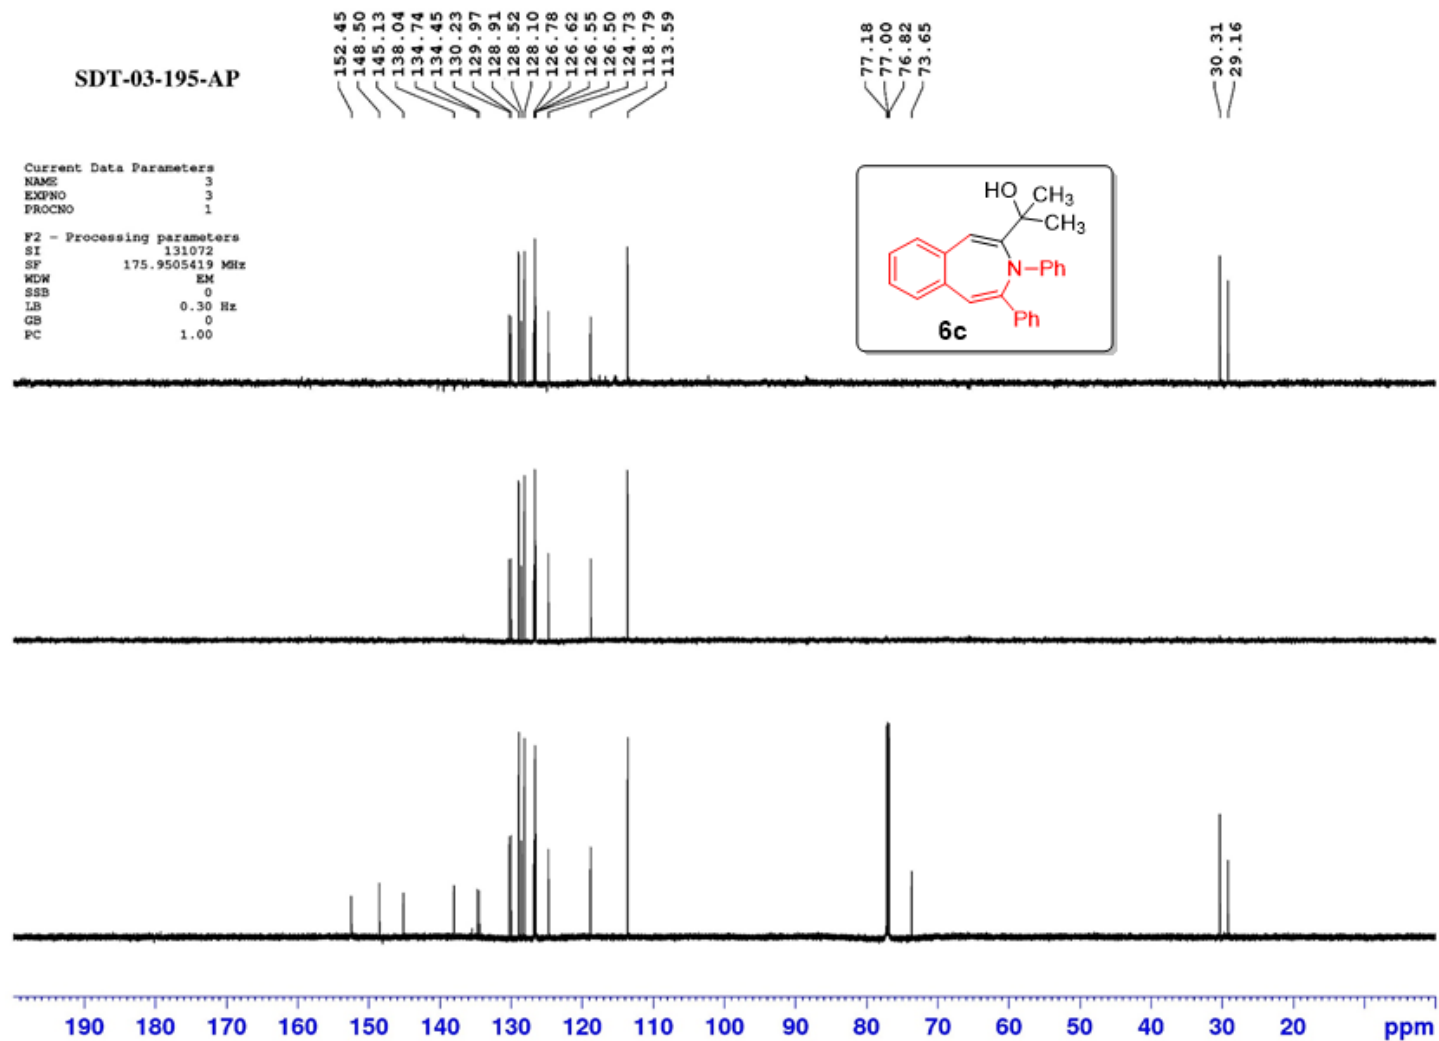

Solvent: CDCl<sub>3</sub>  
SFO1: 700 MHz

7.952  
7.950  
7.939  
7.454  
7.443  
7.433  
7.423  
7.411  
7.395  
7.384  
7.373  
7.341  
7.331  
7.322  
7.312  
7.269  
7.257  
7.247  
7.239  
6.996  
6.985  
6.973  
6.665  
6.654  
6.644  
6.532  
6.520

SDT-03-194-AP

Current Data Parameters  
NAME SDT-03-194-AP-H.fid  
EXPNO 1  
PROCNO 1

F2 - Processing parameters  
SI 65536  
SF 699.7431022 MHz  
WDW EM  
SSB 0  
LB 0.30 Hz  
GB 0  
PC 1.00

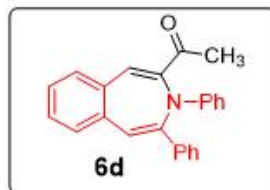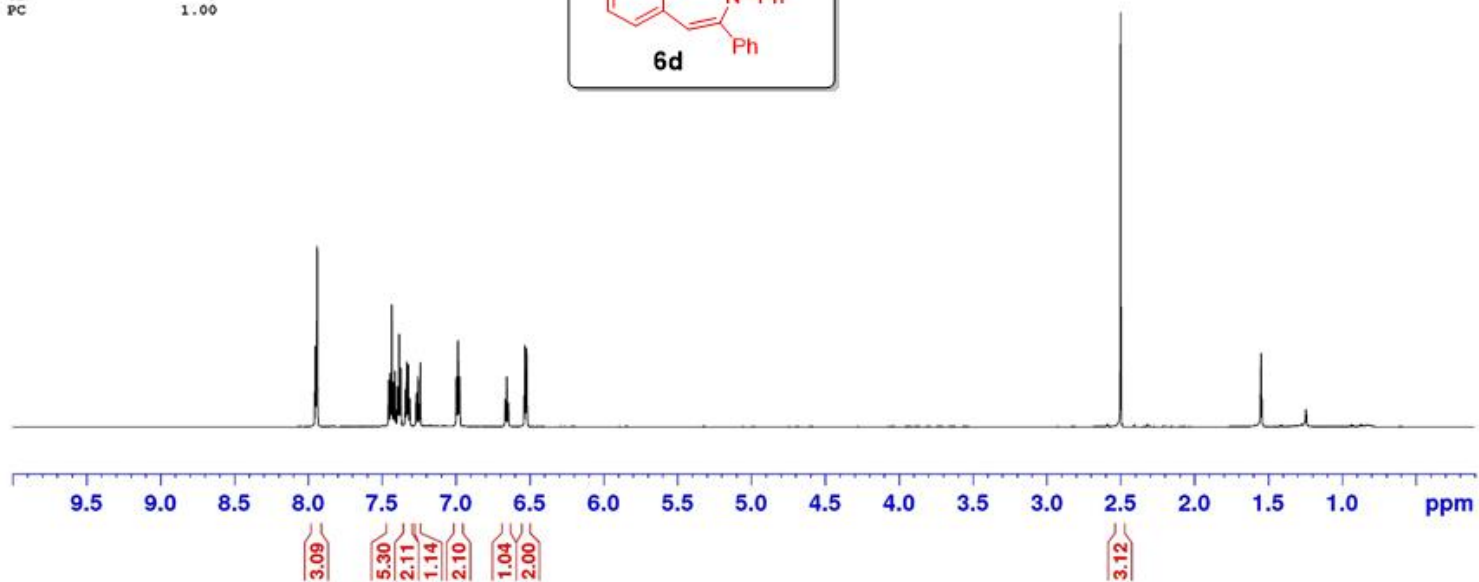

Solvent: CDCl<sub>3</sub>  
SFO1: 175 MHz

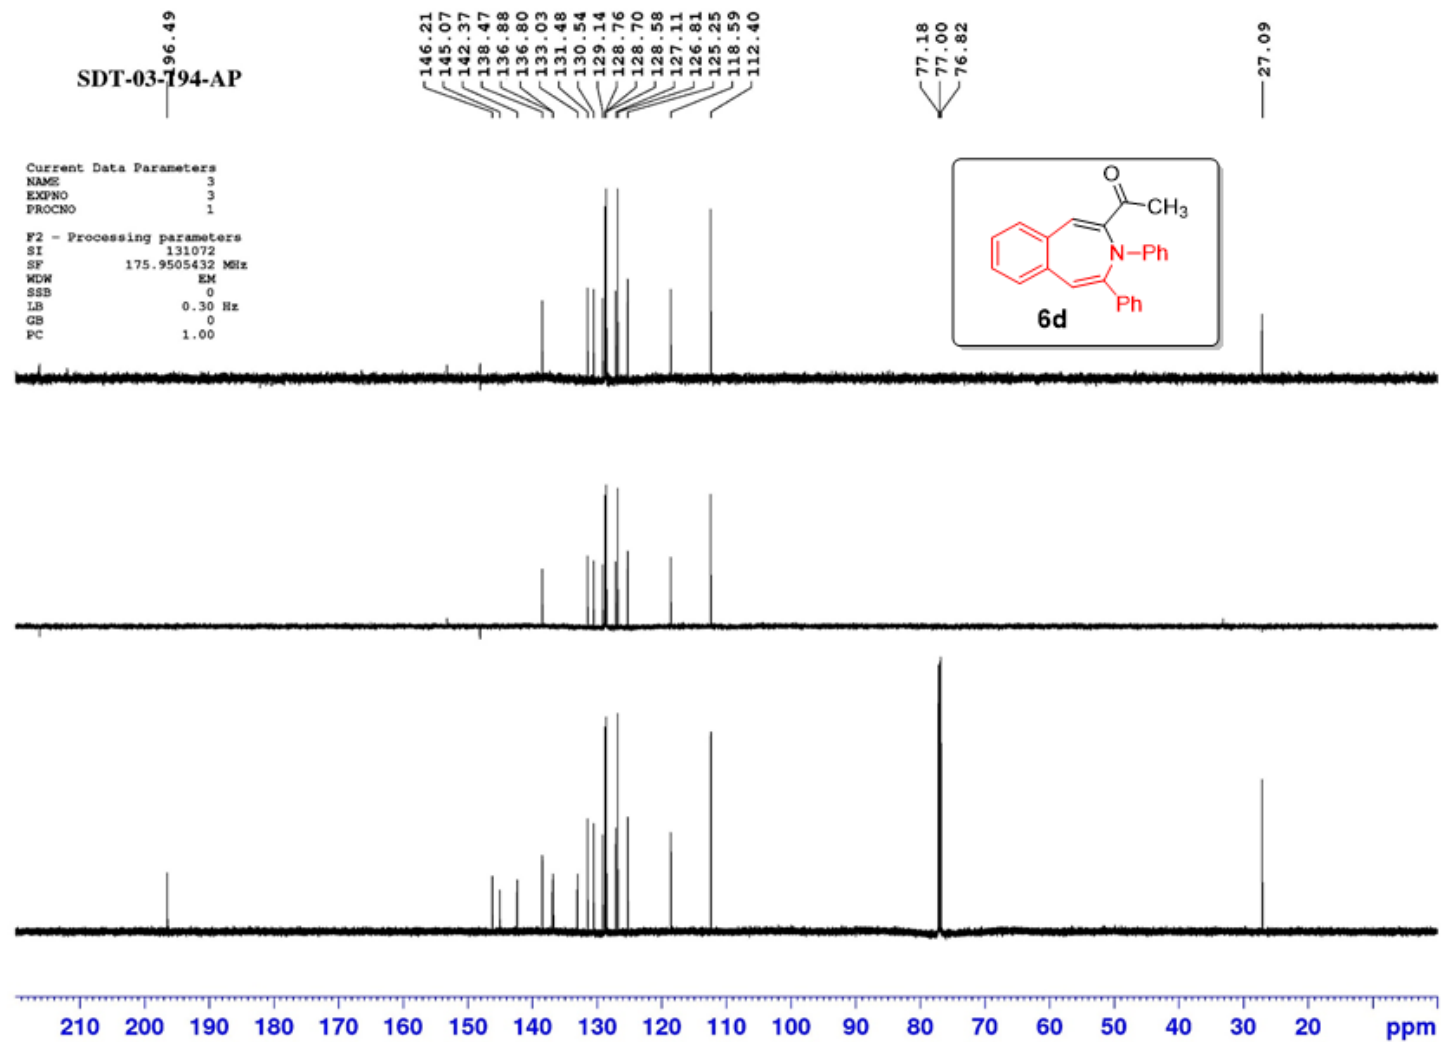

Solvent: CDCl<sub>3</sub>  
SFO1: 400 MHz

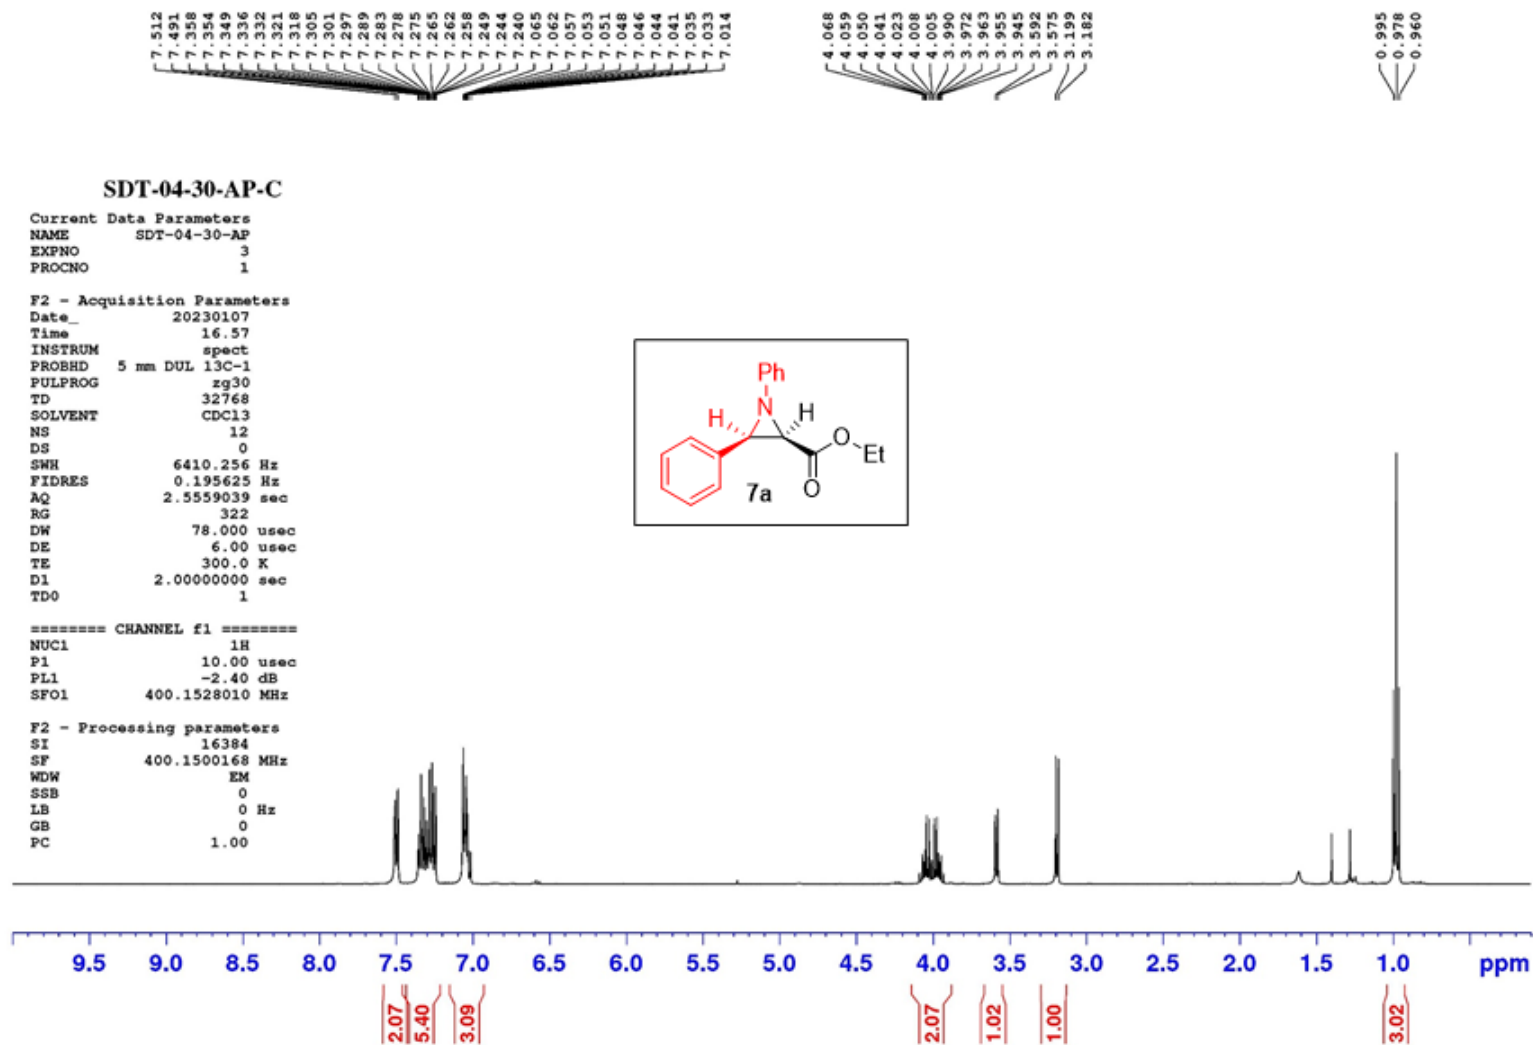

Solvent: CDCl<sub>3</sub>  
SFO1: 100 MHz

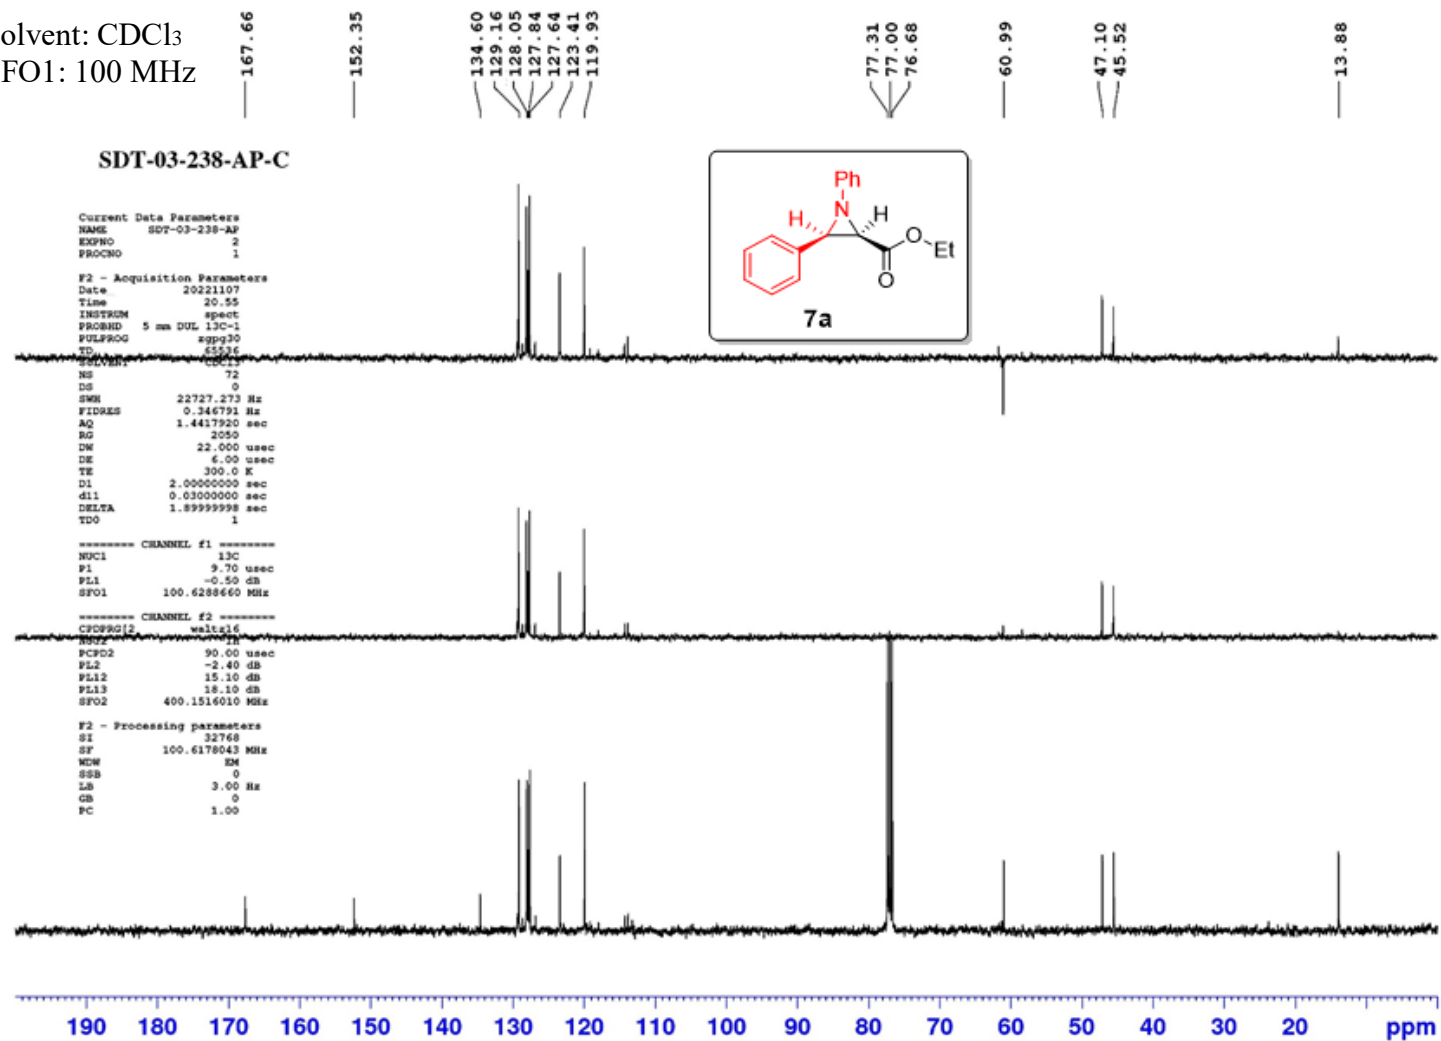



Solvent: CDCl<sub>3</sub>  
SFO1: 400 MHz

Jørgensen procedure Crude <sup>1</sup>H NMR Data

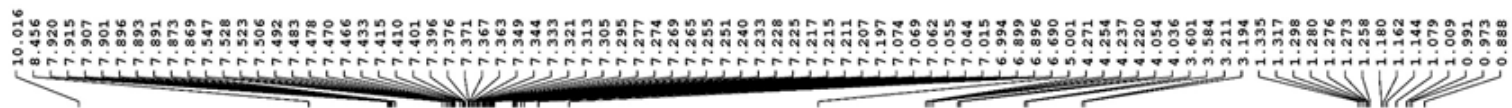

**SDT-04-29-3-CR**

Current Data Parameters  
 NAME SDT-04-29-3  
 EXPNO 1  
 PROCNO 1

F2 - Acquisition Parameters  
 Date\_ 20230110  
 Time 12.02  
 INSTRUM spect  
 PROBHD 5 mm DUL 13C-1  
 PULPROG zg30  
 TD 32768  
 SOLVENT CDCl3  
 NS 12  
 DS 0  
 SWH 6410.256 Hz  
 FIDRES 0.195625 Hz  
 AQ 2.5559039 sec  
 RG 144  
 DW 78.000 usec  
 DE 6.00 usec  
 TE 300.0 K  
 D1 2.00000000 sec  
 TD0 1

==== CHANNEL f1 =====  
 NUC1 1H  
 P1 10.00 usec  
 PL1 -2.40 dB  
 SFO1 400.1528010 MHz

F2 - Processing parameters  
 SI 16384  
 SF 400.1500168 MHz  
 WDW EM  
 SSB 0  
 LB 0 Hz  
 GB 0  
 PC 1.00

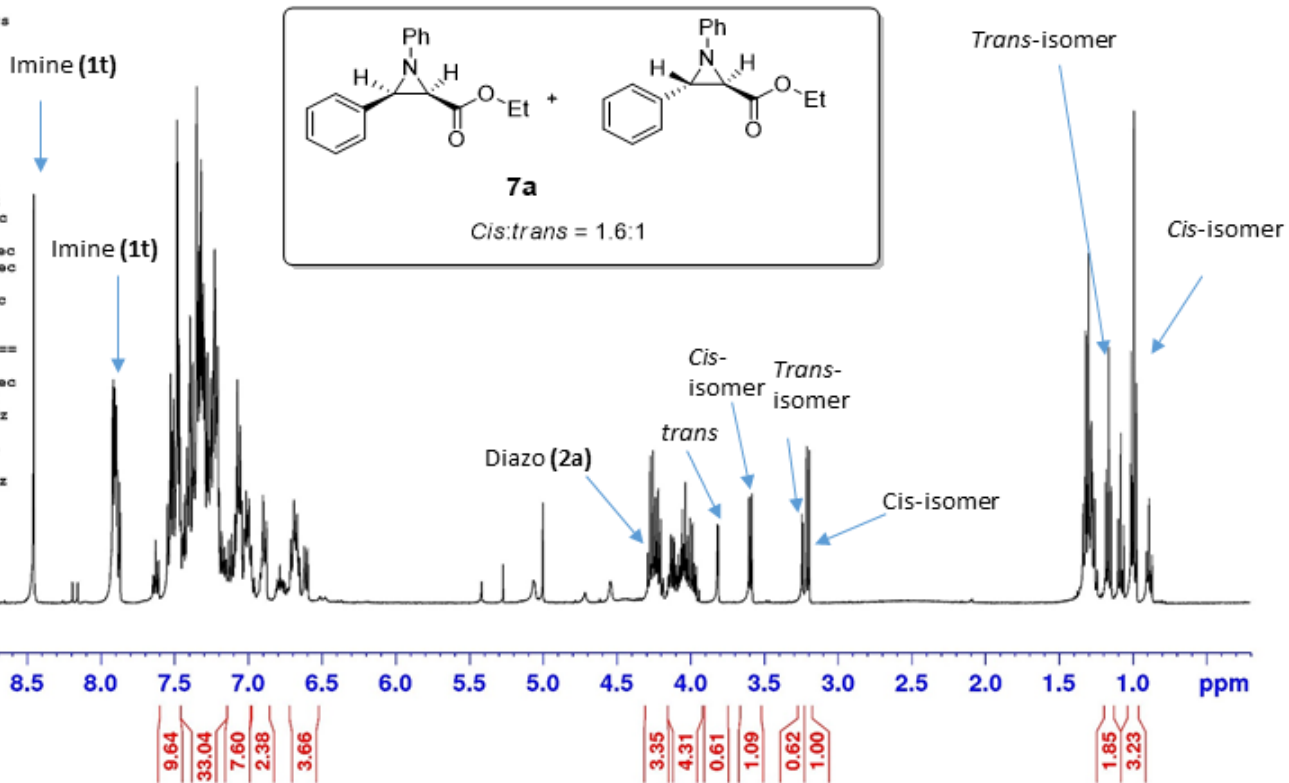

Solvent: CDCl<sub>3</sub>  
SFO1: 700 MHz

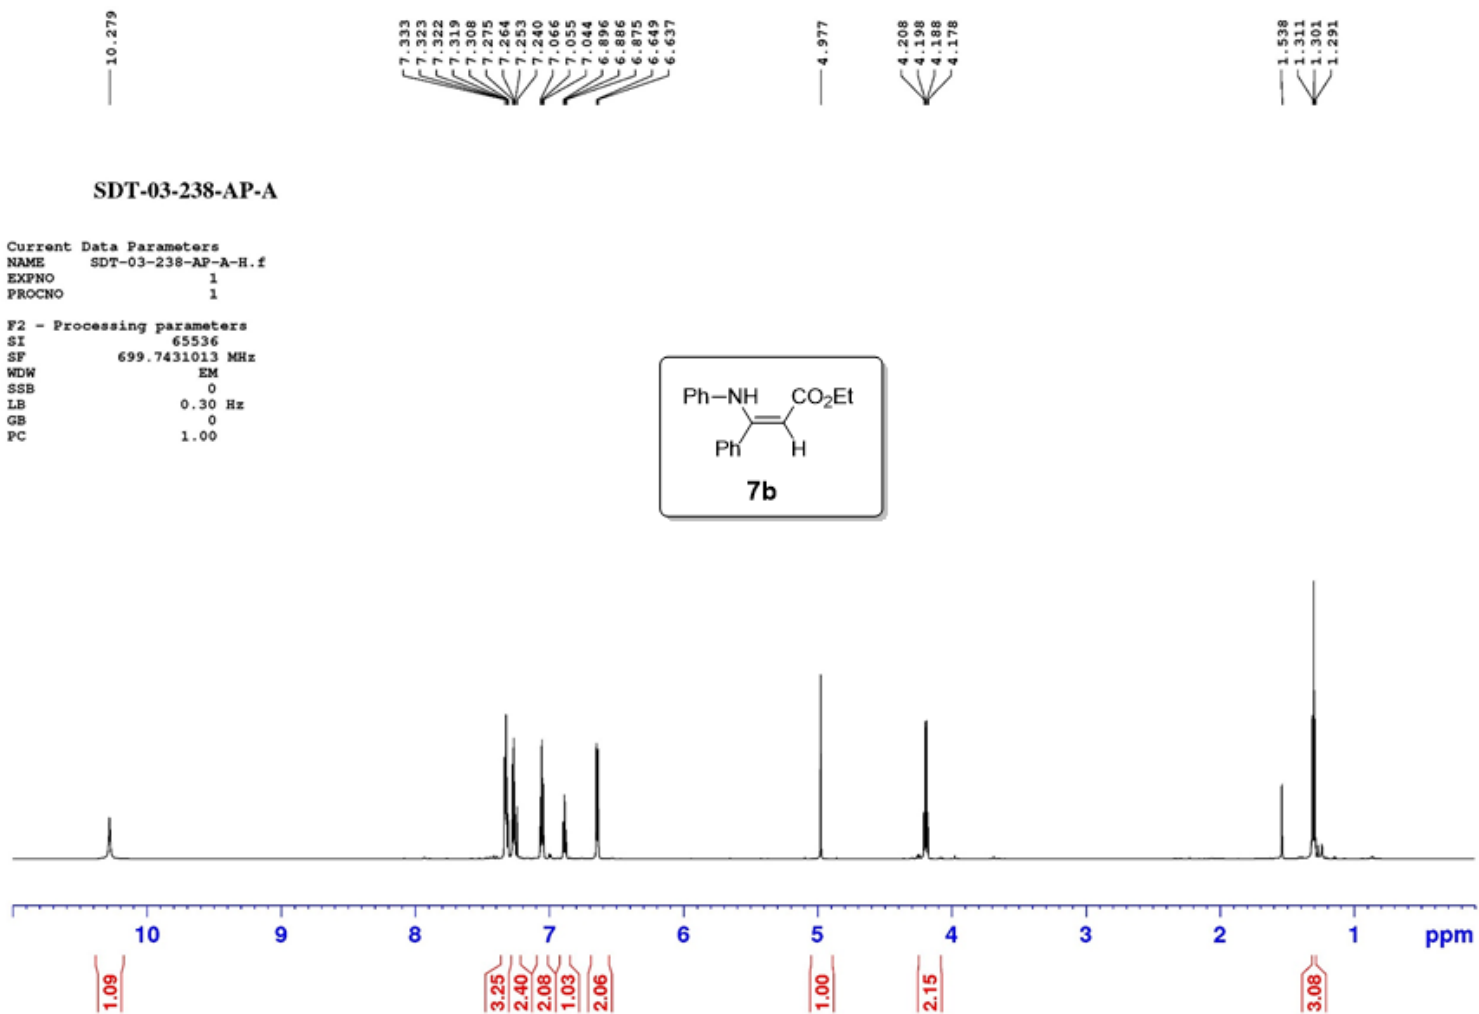

Solvent: CDCl<sub>3</sub>  
SFO1: 175 MHz

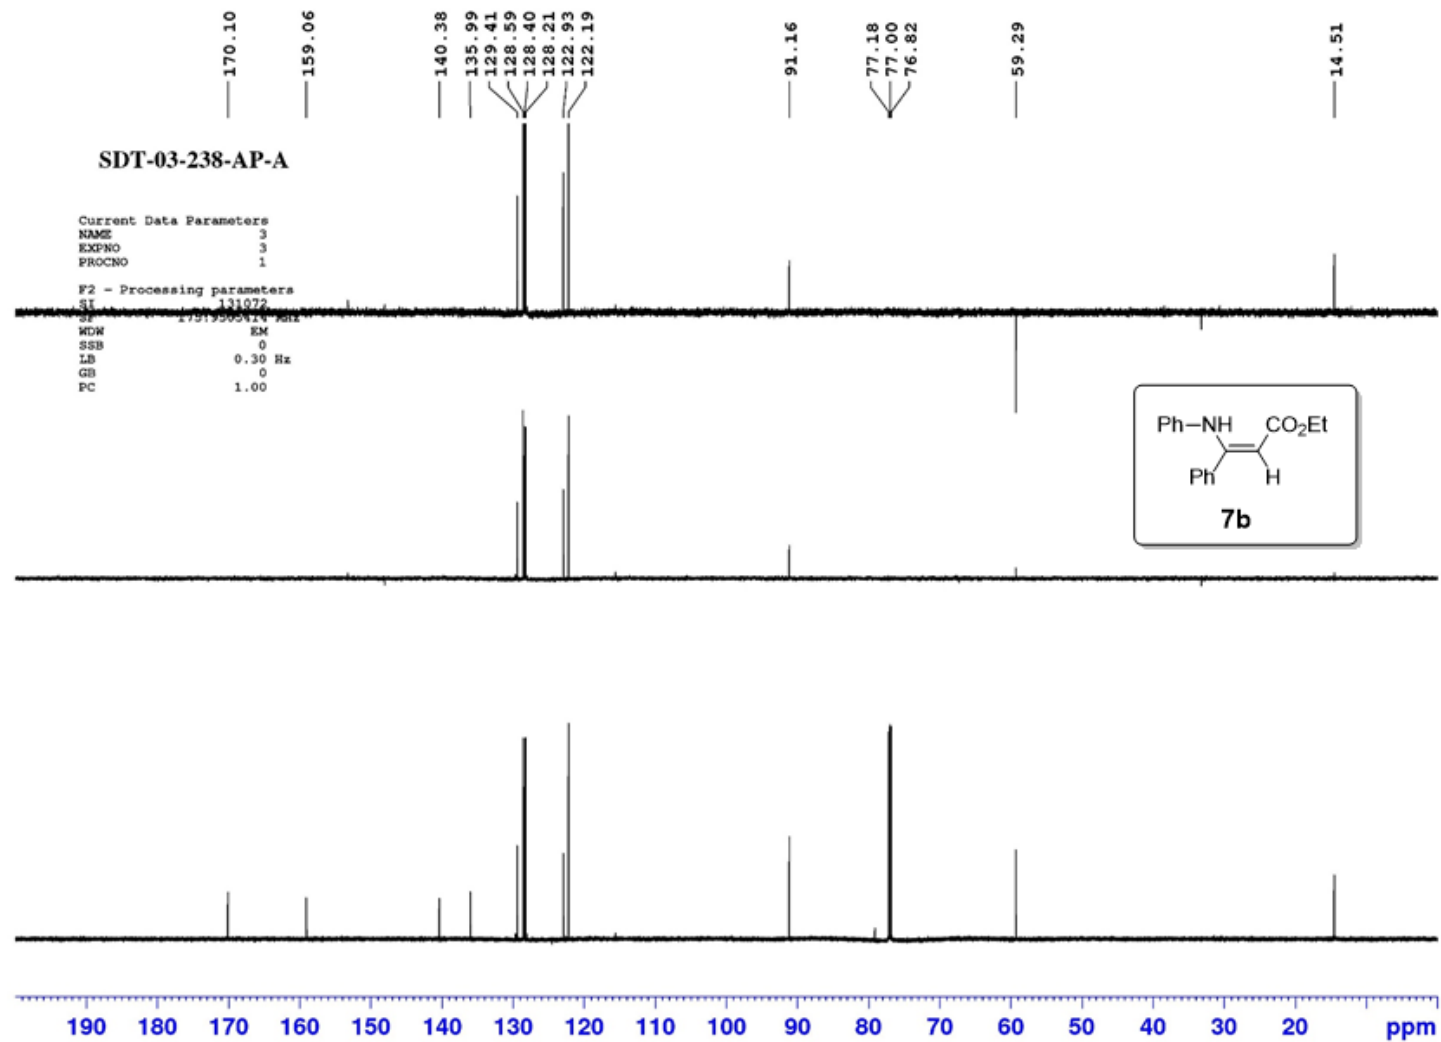

Solvent: CDCl<sub>3</sub>  
SFO1: 400 MHz

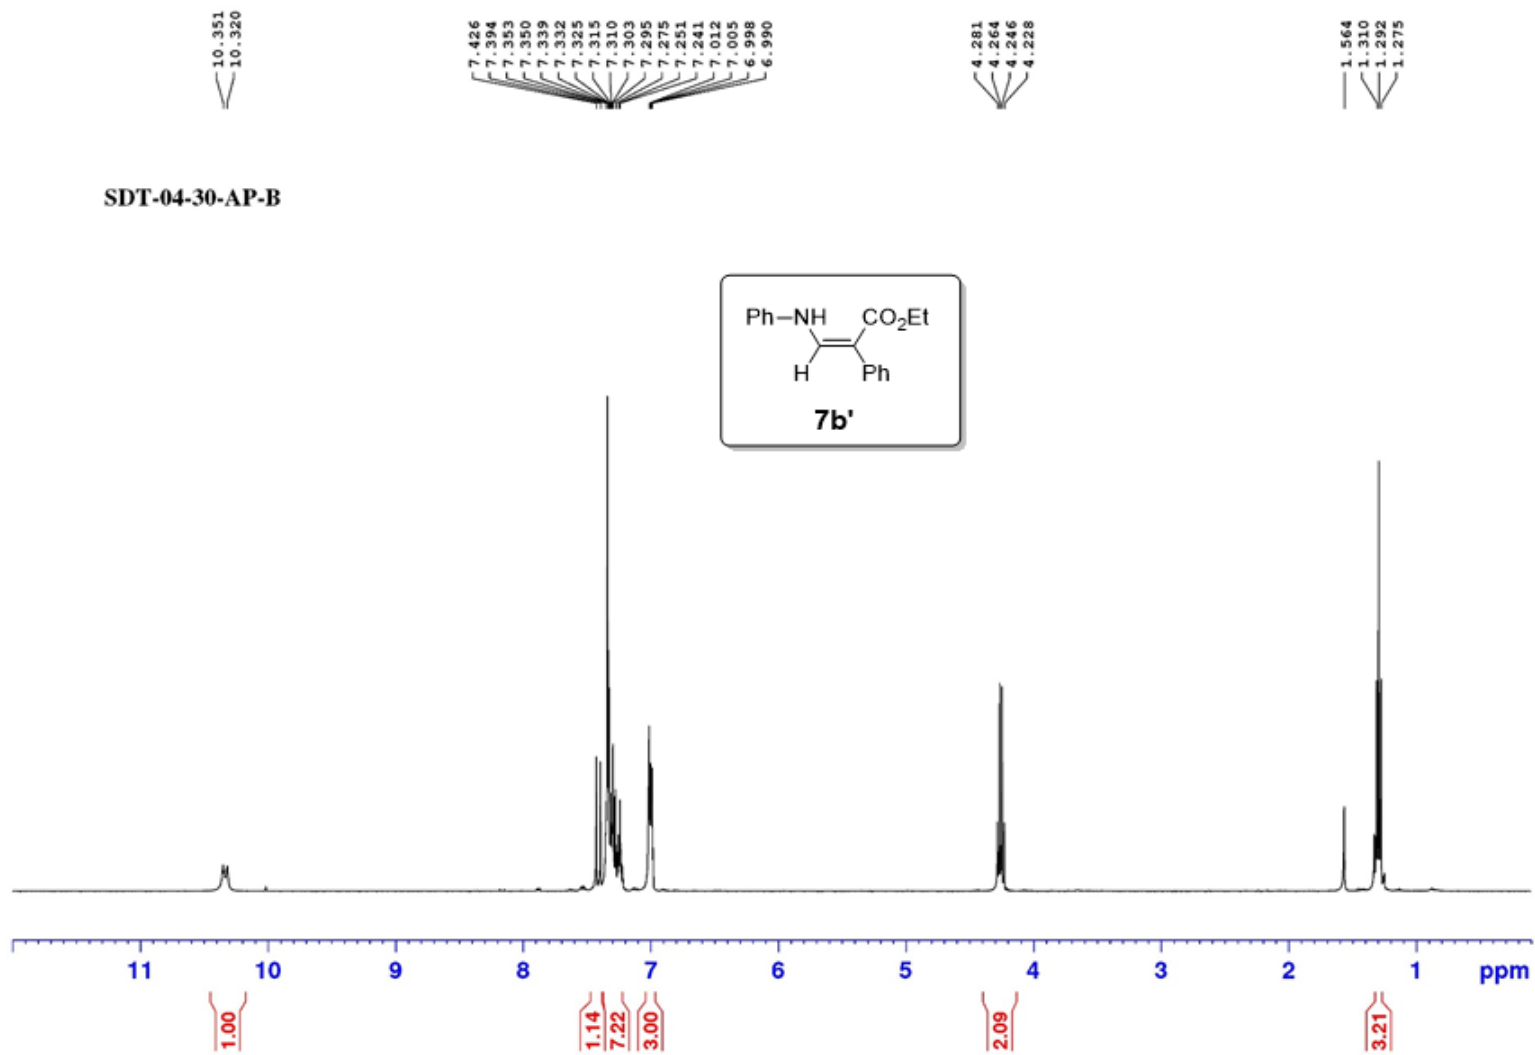

Solvent: CDCl<sub>3</sub>  
SFO1: 100 MHz

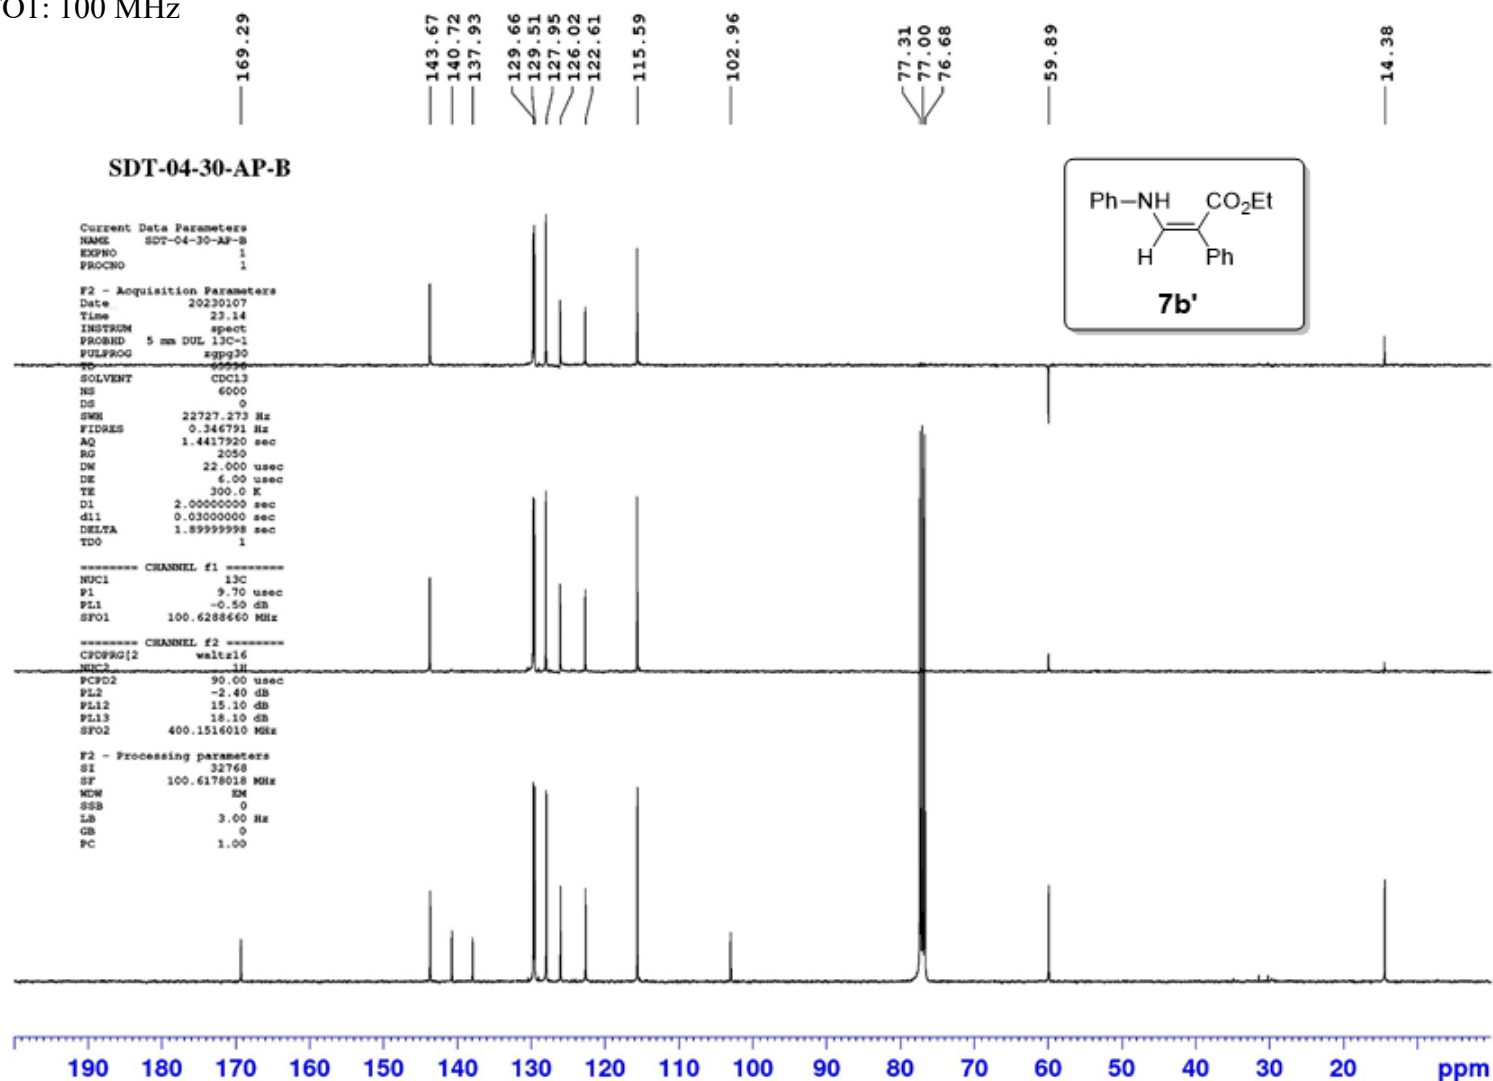

Solvent: CDCl<sub>3</sub>  
 SFO1: 400 MHz

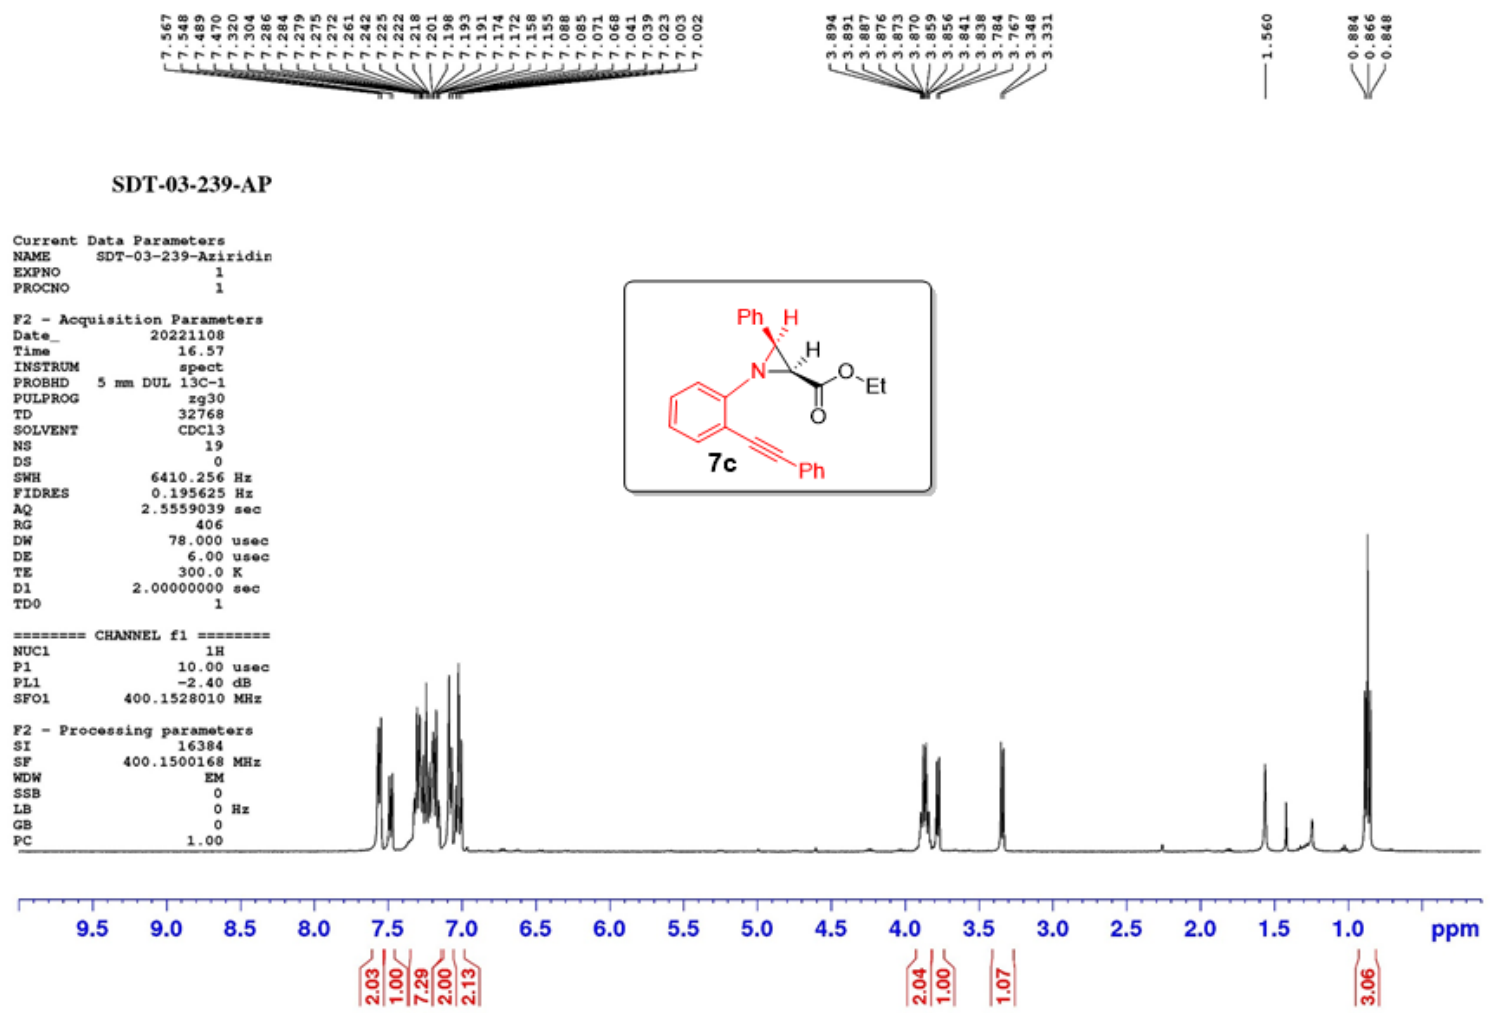

Solvent: CDCl<sub>3</sub>  
SFO1: 100 MHz

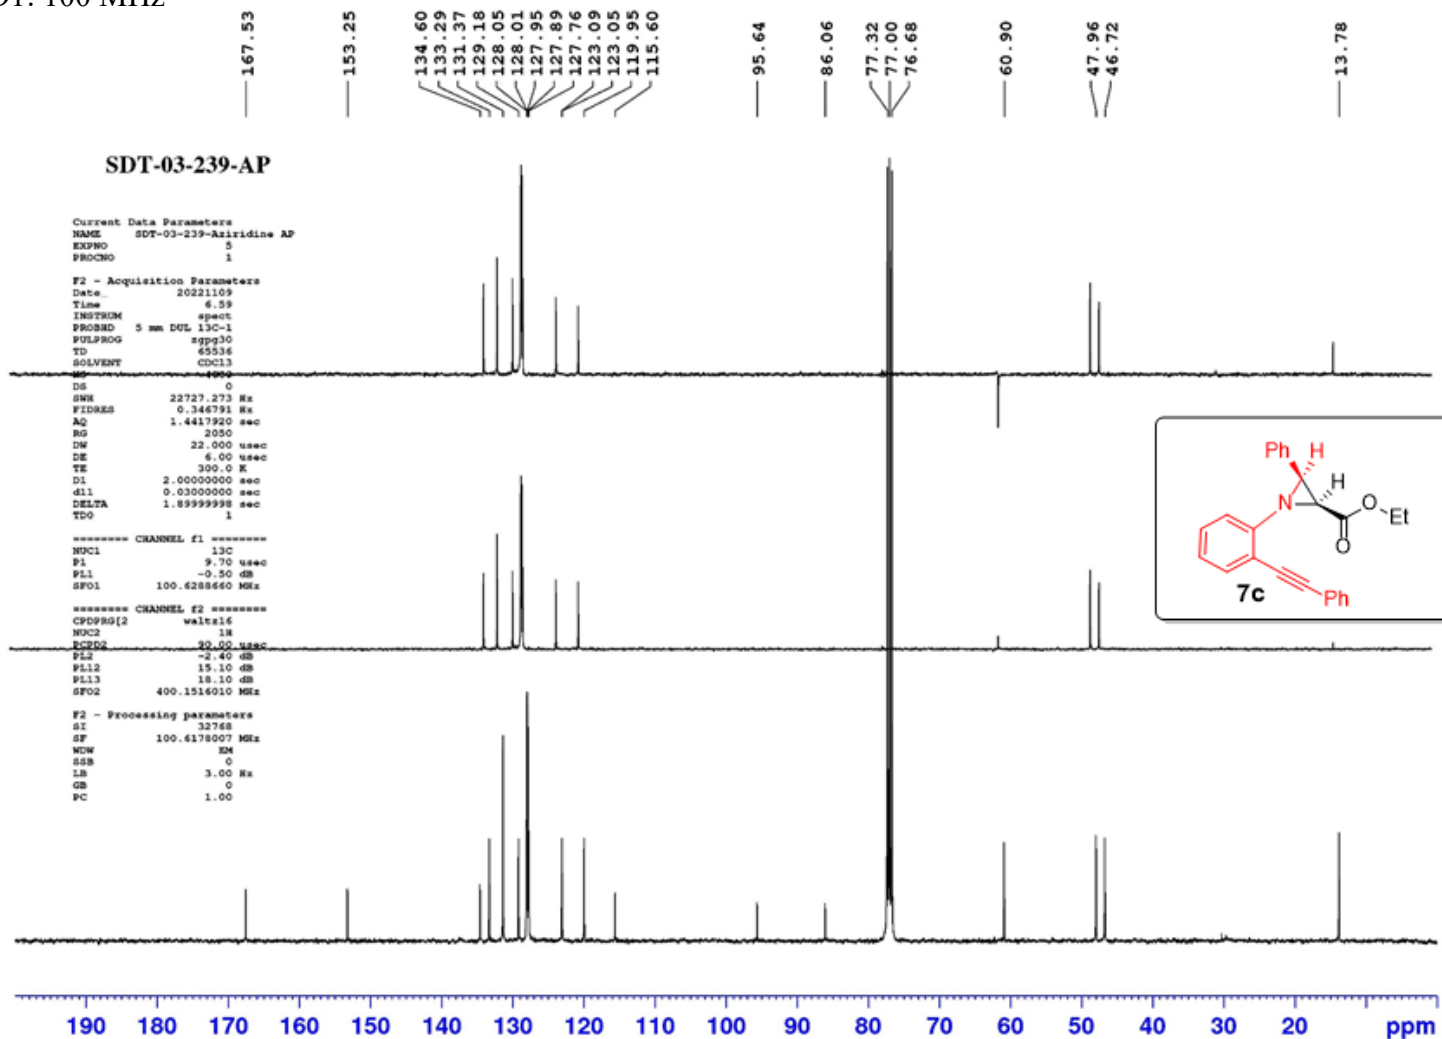

Supplement: d3qo00134b1.pdf [file d3qo00134b1.pdf]
